# Supplementary material for: De novo genome assembly of Geosmithia morbida, the causal agent of thousand cankers disease
Source: PeerJ. 2016 May 2;4:e1952. doi: 10.7717/peerj.1952 (PMC4860301; doi:10.7717/peerj.1952)
Supplement: Supplemental Information 2 [file peerj-04-1952-s002.xlsx]

## Sheet: Sheet1
queryID	subjectID	percIdentity	alnLength	mismatch	gapopen	start_of_aln in query	end_of_aln in query	start_of_aln in subject	end_of_aln in subject	evalue	bitscore
NechaP56811	1161|PHI:1161|MgMfs1|A4ZGP3|54734|Mycosphaerella	26.54	437	295	10	1	421	81	507	3e-40	150
NechaP11453	144|PHI:144|CHT42|AAC05829|29875|Trichoderma	26.03	292	152	11	352	605	34	299	2e-12	67
NechaP89550	1788|PHI:1788|GzZC103|I1S1N1|5518|Gibberella	23.43	653	340	23	12	573	15	598	9e-22	97.4
NechaP89546	3630	24.15	443	271	20	51	467	54	457	4e-13	69.7
NechaP89542	1905|PHI:1905|GzZC220|I1RHN3|5518|Gibberella	30.3	99	66	3	13	111	317	412	5e-07	45.1
NechaP56770	261|PHI:261|ICL1|AAM89498|5022|Leptosphaeria	36.15	520	304	9	8	503	4	519	1e-102	319
NechaP73318	2247|PHI:2247|Sch1|EAT82552|13684|Phaeosphaeria	36.43	269	161	6	5	271	16	276	2e-42	147
NechaP56726	404|PHI:404|PTH11|AAD30436|318829|Magnaporthe	27.27	363	253	6	32	388	32	389	7e-37	140
NechaP89517	2279|PHI:2279|Conserved	28.88	277	159	7	21	265	15	285	4e-27	105
NechaP73313	267|PHI:267|MLT1|AAD51594|5476|Candida	28.52	1455	775	46	43	1317	234	1603	1e-158	519
NechaP56714	538|PHI:538|FRT1|AAU87358|40559|Botrytis	25	440	287	15	104	522	140	557	7e-21	93.6
NechaP56711	191|PHI:191|TOM1|AAB08446|39703|Septoria	32.12	439	206	13	16	367	54	487	3e-41	160
NechaP56711	191|PHI:191|TOM1|AAB08446|39703|Septoria	30.5	282	167	6	572	824	521	802	2e-29	122
NechaP89515	1743|PHI:1743|GzZC058|I1S8J4|5518|Gibberella	40.94	657	301	16	22	647	9	609	8e-138	420
NechaP56710	1260|PHI:1260|FGSG_13944|I1RUC7|5518|Gibberella	31.61	155	100	2	1	154	449	598	9e-10	54.3
NechaP56710	1260|PHI:1260|FGSG_13944|I1RUC7|5518|Gibberella	32.28	127	85	1	3	128	484	610	1e-08	51.2
NechaP89500	438|PHI:438|BcBOT1	27.31	454	284	13	9	428	17	458	2e-40	149
NechaP56692	1710|PHI:1710|GzZC025|I1RIH3|5518|Gibberella	33.72	172	109	1	29	200	218	384	6e-31	117
NechaP56685	2240|PHI:2240|Srt1|Q4PBY9|5270|Ustilago	26.29	483	338	8	50	523	25	498	5e-43	159
NechaP98465	2315|PHI:2315|ChLae1|G4XKY9|5016|Cochliobolus	26.85	149	98	2	123	260	142	290	6e-09	53.1
NechaP56680	1992|PHI:1992|GzZC307|I1R983|5518|Gibberella	26.34	205	137	4	8	200	464	666	2e-14	71.6
NechaP56667	1741|PHI:1741|GzZC056|I1S780|5518|Gibberella	32.05	677	365	22	1	642	42	658	5e-85	281
NechaP89486	112|PHI:112|MAK1|AAC49410|140110|Nectria	29.27	123	78	5	56	176	263	378	8e-09	51.2
NechaP98461	2247|PHI:2247|Sch1|EAT82552|13684|Phaeosphaeria	26.54	211	149	4	5	211	35	243	7e-11	58.5
NechaP9125	2251|PHI:2251|Gox1|Q696X2|13684|Phaeosphaeria	30.47	128	76	4	13	138	8	124	2e-13	63.5
NechaP9125	2251|PHI:2251|Gox1|Q696X2|13684|Phaeosphaeria	31.97	122	71	4	13	131	167	279	1e-11	58.5
NechaP89474	1820|PHI:1820|GzZC135|I1S8F7|5518|Gibberella	29.58	355	164	10	272	606	1	289	4e-25	103
NechaP56640	191|PHI:191|TOM1|AAB08446|39703|Septoria	39.83	821	408	18	25	801	17	795	2e-180	540
NechaP89467	404|PHI:404|PTH11|AAD30436|318829|Magnaporthe	25.08	315	206	9	19	313	109	413	2e-23	99.4
NechaP89468	2321|PHI:2321|SidI|Q4WR83|746128|Aspergillus	21.08	536	287	16	62	541	21	476	3e-12	66.6
NechaP73308	2605|PHI:2605|hgc1|Q5ABE2	77.18	425	95	1	31	455	15	437	0	707
NechaP56620	2927|PHI:2927|lip5|J9N2Z8|59765|Fusarium	32.59	537	285	18	37	521	22	533	3e-74	245
NechaP56618	541|PHI:541|LIP1|AAU87359|332648|Botrytis	31.42	592	335	17	12	564	10	569	1e-64	221
NechaP89460	2336|PHI:2336|NIA1|O00101|13684|Stagonospora	25.36	343	203	17	22	327	89	415	2e-15	75.1
NechaP56607	404|PHI:404|PTH11|AAD30436|318829|Magnaporthe	23.05	269	193	6	18	279	121	382	4e-11	60.8
NechaP98450	413|PHI:413|MPD1|AAT84078|13684|Stagonospora	25.53	380	242	14	4	354	10	377	2e-16	79.7
NechaP89456	1955|PHI:1955|GzZC270|I1RM02|5518|Gibberella	36.3	799	438	18	16	787	2	756	9e-153	466
NechaP102313	1788|PHI:1788|GzZC103|I1S1N1|5518|Gibberella	24.55	660	358	22	12	607	15	598	5e-30	124
NechaP56589	2693|PHI:2693|GcABC-G1|F0XP73|226899|Grosmannia	68.37	1451	444	8	42	1487	91	1531	0	2044
NechaP98443	1824|PHI:1824|GzZC139|I1RYC6|5518|Gibberella	39.46	555	270	10	200	696	32	578	3e-129	396
NechaP56579	2329|PHI:2329|CTB4|A0ST42|29003|Cercospora	36.77	465	281	8	7	465	51	508	1e-95	299
NechaP98445	1904|PHI:1904|GzZC219|I1RHR0|5518|Gibberella	55.1	49	22	0	7	55	25	73	2e-12	67.8
NechaP56578	157|PHI:157|TOXF|AAD45321|5017|Cochliobolus	25.81	372	240	13	13	378	4	345	8e-23	95.5
NechaP19921	2009|PHI:2009|HOS4|EDK06449|148305|Magnaporthe	36.47	85	51	2	1	83	423	506	4e-08	47.8
NechaP89432	197|PHI:197|ALO1|AAC98913|5476|Candida	22.42	223	144	7	30	232	53	266	3e-08	52.8
NechaP89430	1260|PHI:1260|FGSG_13944|I1RUC7|5518|Gibberella	35.94	192	112	7	799	984	449	635	7e-14	74.3
NechaP89430	1260|PHI:1260|FGSG_13944|I1RUC7|5518|Gibberella	30.49	223	117	6	703	920	451	640	4e-09	58.5
NechaP12611	1956|PHI:1956|GzZC271|I1RLT2|5518|Gibberella	34.1	481	274	13	1	449	126	595	5e-85	275
NechaP89428	2976|PHI:2976|CgOPT1|C6ZRH8|29905|Colletotrichum	42.82	703	387	7	8	700	47	744	0	593
NechaP89421	1401|PHI:1401|GzC2H064|I1RVY6|5518|Gibberella	23.24	241	167	6	332	559	349	584	7e-07	50.1
NechaP56548	112|PHI:112|MAK1|AAC49410|140110|Nectria	75.98	458	110	0	1	458	1	458	0	759
NechaP89404	1835|PHI:1835|GzZC150|I1RIL1|5518|Gibberella	29.91	107	70	2	1	106	466	568	7e-11	57.4
NechaP56534	1927|PHI:1927|GzZC242|I1RR79|5518|Gibberella	58.12	554	217	3	1	544	1	549	0	647
NechaP105766	2806|PHI:2806|SsSOD1|A7E5X4|5180|Sclerotinia	71.43	154	44	0	1	154	1	154	2e-80	236
NechaP98426	143|PHI:143|CHT|AAA33353|5563|Gloeocercospora	34.8	296	170	9	6	293	7	287	5e-49	169
NechaP56504	404|PHI:404|PTH11|AAD30436|318829|Magnaporthe	25	228	150	7	94	308	186	405	5e-12	64.3
NechaP56509	2378|PHI:2378|DEP4|D2E9W9|29001|Alternaria	30.53	190	118	8	17	198	6	189	9e-13	68.2
NechaP105765	2976|PHI:2976|CgOPT1|C6ZRH8|29905|Colletotrichum	28.8	618	368	14	109	699	163	735	1e-67	237
NechaP56499	2825|PHI:2825|SET1|Q5ABG1|5476|Candida	41.38	87	48	1	3	86	953	1039	1e-18	78.6
NechaP56483	2839|PHI:2839|RED1|Q8NJQ2|5016|Cochliobolus	27.84	176	106	5	142	317	121	275	4e-07	48.5
NechaP89351	1883|PHI:1883|GzZC198|I1RJ71|5518|Gibberella	31.67	480	258	18	24	453	40	499	5e-48	178
NechaP89354	2393|PHI:2393|Related	24.11	423	262	12	55	452	3	391	7e-24	101
NechaP56470	2844|PHI:2844|BRM2|O93802|5599|Alternaria	33.96	268	155	8	3	257	9	267	8e-38	134
NechaP98423	112|PHI:112|MAK1|AAC49410|140110|Nectria	25.73	377	246	13	13	377	24	378	9e-25	103
NechaP64996	1520|PHI:1520|GzHOMEL024|I1RWS3|5518|Gibberella	27.85	79	56	1	16	94	145	222	5e-07	43.9
NechaP73279	310|PHI:310|MgAtr4|AAK15314|54734|Mycosphaerella	50.25	1421	673	11	33	1436	122	1525	0	1419
NechaP56444	255|PHI:255|FUM1	30	170	98	7	17	182	1867	2019	2e-08	53.1
NechaP56446	881|PHI:881|MGG_04556|EDJ96020|318829|Magnaporthe	30.25	314	196	9	29	329	33	336	2e-33	125
NechaP56442	2895|PHI:2895|F-avi4330|B9JV05|373|Agrobacterium	28.72	195	110	6	34	219	1807	1981	3e-09	55.8
NechaP89330	1721|PHI:1721|GzZC036|I1S914|5518|Gibberella	24.04	441	257	14	4	427	13	392	1e-20	90.5
NechaP73270	2269|PHI:2269|Mdh1|0|13684|Phaeosphaeria	23.6	267	164	9	23	272	3	246	3e-07	48.5
NechaP89325	1998|PHI:1998|GzZC313|I1R9B9|5518|Gibberella	31.75	359	195	9	9	356	5	324	3e-48	168
NechaP98408	1832|PHI:1832|GzZC147|I1RH29|5518|Gibberella	81.94	454	77	2	271	724	32	480	0	790
NechaP14093	2704|PHI:2704|Tri12|F6MFB4|5518|Fusarium	30.06	499	334	9	1	486	50	546	6e-63	214
NechaP56363	112|PHI:112|MAK1|AAC49410|140110|Nectria	38.02	434	250	8	10	439	25	443	6e-91	285
NechaP56358	358|PHI:358|ILV2|AAR29084|5207|Cryptococcus	25.16	159	105	4	27	183	141	287	1e-07	52
NechaP89306	1877|PHI:1877|GzZC192|I1RPI7|5518|Gibberella	33.64	107	62	3	19	118	7	111	5e-08	53.1
NechaP56368	358|PHI:358|ILV2|AAR29084|5207|Cryptococcus	25.93	594	373	17	14	563	126	696	6e-34	134
NechaP56375	2844|PHI:2844|BRM2|O93802|5599|Alternaria	30.86	256	163	4	6	249	10	263	2e-31	116
NechaP18057	1391|PHI:1391|GzC2H054|I1RU55|5518|Gibberella	32.14	84	57	0	86	169	624	707	4e-08	50.4
NechaP56352	1161|PHI:1161|MgMfs1|A4ZGP3|54734|Mycosphaerella	24.01	504	349	10	57	538	84	575	5e-39	147
NechaP56330	2362|PHI:2362|XlnR|A8QJI7	37.35	573	308	12	1	539	265	820	7e-95	309
NechaP56319	438|PHI:438|BcBOT1	30.1	103	70	1	1	103	83	183	4e-09	51.2
NechaP56321	438|PHI:438|BcBOT1	39.22	102	60	1	98	199	307	406	5e-14	67.8
NechaP56320	225|PHI:225|PEP5|AAK16922|140110|Nectria	83.47	242	39	1	80	321	1	241	2e-134	384
NechaP56314	1742|PHI:1742|GzZC057|I1S7H5|5518|Gibberella	26.86	484	296	14	91	537	160	622	2e-44	165
NechaP56283	2968|PHI:2968|Hxs1|J9VQA5|5207|Cryptococcus	26.99	478	309	13	26	490	21	471	2e-35	135
NechaP89269	4211	25.22	452	298	14	123	543	184	626	9e-30	121
NechaP56310	511|PHI:511|CaNAG4|EAK93098|5476|Candida	26.8	194	116	6	38	212	119	305	2e-09	56.2
NechaP89271	2654|PHI:2654|DUR1,2|Q59VF3|5476|Candida	24.55	440	243	18	123	539	69	442	1e-15	77.4
NechaP56269	1852|PHI:1852|GzZC167|I1S170|5518|Gibberella	41.85	399	203	3	1	396	1	373	3e-106	319
NechaP56268	2227|PHI:2227|pao|D4III8|5270|Ustilago	29.69	128	66	4	42	150	19	141	2e-07	50.4
NechaP15869	1895|PHI:1895|GzZC210|I1RNU2|5518|Gibberella	25.39	445	276	8	1	406	222	649	2e-30	120
NechaP98378	2377|PHI:2377|DEP3|D2E9W8|29001|Alternaria	34.78	506	310	6	36	527	45	544	2e-82	268
NechaP56277	287|PHI:287|CLNR1|AAN65464|290576|Colletotrichum	45.22	157	62	5	60	214	678	812	6e-24	99.8
NechaP56259	2844|PHI:2844|BRM2|O93802|5599|Alternaria	38.87	265	146	7	1	254	8	267	6e-50	165
NechaP56258	1888|PHI:1888|GzZC203|I1RHY2|5518|Gibberella	27.06	170	105	5	1	163	2	159	8e-10	57.8
NechaP56257	1704|PHI:1704|GzZC019|I1RPF7|5518|Gibberella	56.58	456	198	0	17	472	84	539	0	535
NechaP56243	2968|PHI:2968|Hxs1|J9VQA5|5207|Cryptococcus	28.79	455	304	7	18	464	23	465	3e-53	187
NechaP89232	1555|PHI:1555|GzMyb019|I1RDG6|5518|Gibberella	26.63	492	333	9	46	521	66	545	2e-49	177
NechaP56227	2834|PHI:2834|LAM1|C3PTB1|5016|Cochliobolus	37.75	151	91	3	753	900	6	156	4e-24	104
NechaP56228	2025|PHI:2025|HDL1|G4MQZ9|148305|Magnaporthe	31.31	99	63	1	98	191	214	312	6e-10	57.8
NechaP98368	1555|PHI:1555|GzMyb019|I1RDG6|5518|Gibberella	23.24	426	304	8	23	435	68	483	4e-24	102
NechaP89238	1814|PHI:1814|GzZC129|I1RV04|5518|Gibberella	32.35	714	374	20	15	676	5	661	3e-87	291
NechaP56211	3415	26.18	275	176	7	212	476	133	390	4e-22	97.1
NechaP18435	2269|PHI:2269|Mdh1|0|13684|Phaeosphaeria	26.75	228	140	7	28	240	15	230	1e-12	62.8
NechaP89225	441|PHI:441|BTP1|CAE55153|40559|Botrytis	27.78	324	201	13	7	306	31	345	1e-19	86.3
NechaP56206	541|PHI:541|LIP1|AAU87359|332648|Botrytis	28.55	585	314	17	6	541	8	537	4e-51	184
NechaP56199	441|PHI:441|BTP1|CAE55153|40559|Botrytis	25.29	261	181	9	29	284	39	290	2e-09	55.8
NechaP89209	1865|PHI:1865|GzZC180|I1S9C5|5518|Gibberella	28.36	134	94	2	236	368	207	339	7e-09	55.8
NechaP89214	1958|PHI:1958|GzZC273|I1RMD1|5518|Gibberella	23.89	473	284	14	22	424	74	540	1e-13	71.2
NechaP56159	2022|PHI:2022|BUF1|MGG_02252|148305|Magnaporthe	29.1	189	124	3	13	197	26	208	5e-16	73.6
NechaP56158	2570|PHI:2570|CYB2|Q6FM61|5478|Candida	41.68	475	264	8	2	464	85	558	1e-115	354
NechaP89187	1902|PHI:1902|GzZC217|I1RJS7|5518|Gibberella	28.57	245	117	5	177	378	273	502	1e-23	102
NechaP56145	2251|PHI:2251|Gox1|Q696X2|13684|Phaeosphaeria	33.8	142	77	5	30	167	4	132	3e-19	81.6
NechaP56145	2251|PHI:2251|Gox1|Q696X2|13684|Phaeosphaeria	39.85	133	69	4	32	161	164	288	1e-18	80.1
NechaP64974	225|PHI:225|PEP5|AAK16922|140110|Nectria	34.57	162	105	1	203	364	81	241	9e-16	74.3
NechaP89179	2022|PHI:2022|BUF1|MGG_02252|148305|Magnaporthe	28.43	204	136	3	13	212	26	223	3e-17	77
NechaP56146	2570|PHI:2570|CYB2|Q6FM61|5478|Candida	41.68	475	264	8	2	464	85	558	1e-115	354
NechaP89182	1902|PHI:1902|GzZC217|I1RJS7|5518|Gibberella	28.99	238	125	4	249	450	273	502	2e-23	103
NechaP19696	2099|PHI:2099|Pmc1|MGG_07971|148305|Magnaporthe	44.44	135	70	4	1	134	968	1098	9e-34	124
NechaP56121	55|PHI:55|PKS1|AAB08104|5016|Cochliobolus	22.59	332	208	10	30	347	1842	2138	2e-12	66.2
NechaP98341	2256|PHI:2256|Xdh1|Q0UA24|13684|Phaeosphaeria	27.97	379	200	12	25	379	31	360	2e-20	88.6
NechaP56119	1949|PHI:1949|GzZC264|I1RI60|5518|Gibberella	32.77	354	213	7	6	342	4	349	1e-51	177
NechaP98344	26|PHI:26|CaMDR1|CAA37820|5476|Candida	33.11	438	239	9	138	532	114	540	1e-64	220
NechaP56071	2315|PHI:2315|ChLae1|G4XKY9|5016|Cochliobolus	34.24	295	181	7	43	331	3	290	5e-48	164
NechaP56106	1939|PHI:1939|GzZC254|I1RMX8|5518|Gibberella	44.03	243	120	3	5	233	22	262	3e-66	212
NechaP56076	3028	23.12	359	247	11	46	395	74	412	3e-13	68.6
NechaP89153	1765|PHI:1765|GzZC080|I1RY91|5518|Gibberella	24.08	652	373	18	30	656	43	597	4e-38	147
NechaP56107	2968|PHI:2968|Hxs1|J9VQA5|5207|Cryptococcus	26.88	413	277	12	84	485	61	459	2e-23	101
NechaP56041	2042|PHI:2042|ABC3|Q3Y5V5|148305|Magnaporthe	32.16	1312	790	23	39	1267	26	1320	0	623
NechaP56041	2042|PHI:2042|ABC3|Q3Y5V5|148305|Magnaporthe	33.15	543	317	14	761	1271	108	636	1e-63	235
NechaP56037	513|PHI:513|ARN1	28.42	570	372	15	4	557	37	586	3e-57	201
NechaP56055	441|PHI:441|BTP1|CAE55153|40559|Botrytis	28.9	263	168	12	23	270	35	293	2e-20	88.6
NechaP89138	538|PHI:538|FRT1|AAU87358|40559|Botrytis	23.24	512	348	16	15	517	77	552	5e-22	97.4
NechaP56032	1699|PHI:1699|GzZC014|I1RL94|5518|Gibberella	49.31	578	239	9	32	592	64	604	0	532
NechaP56027	1566|PHI:1566|GzOB006|I1RC95|5518|Gibberella	31.58	171	99	4	44	205	170	331	3e-15	72.4
NechaP89121	2020|PHI:2020|Tup1|XP_759427|5270|Ustilago	35.95	306	164	6	845	1119	382	686	4e-44	169
NechaP89121	2020|PHI:2020|Tup1|XP_759427|5270|Ustilago	37.07	259	139	3	881	1115	466	724	5e-42	163
NechaP89121	2020|PHI:2020|Tup1|XP_759427|5270|Ustilago	39.82	221	117	7	919	1124	415	634	5e-35	141
NechaP89121	2020|PHI:2020|Tup1|XP_759427|5270|Ustilago	37.05	224	117	3	874	1073	501	724	2e-32	133
NechaP89121	2020|PHI:2020|Tup1|XP_759427|5270|Ustilago	35.29	204	116	6	961	1149	415	617	2e-23	104
NechaP89121	2020|PHI:2020|Tup1|XP_759427|5270|Ustilago	42.31	78	45	0	870	947	647	724	4e-10	61.2
NechaP89122	1543|PHI:1543|GzMyb007|I1RFQ3|5518|Gibberella	41.07	56	29	1	475	530	154	205	9e-08	51.2
NechaP102284	1903|PHI:1903|GzZC218|I1RHR4|5518|Gibberella	28.61	346	200	9	6	310	3	342	8e-28	113
NechaP56014	438|PHI:438|BcBOT1	36.36	165	91	5	236	393	306	463	1e-22	97.8
NechaP17059	1884|PHI:1884|GzZC199|I1RJ58|5518|Gibberella	41.51	53	31	0	46	98	453	505	2e-08	49.7
NechaP55991	541|PHI:541|LIP1|AAU87359|332648|Botrytis	28.93	515	277	14	52	523	56	524	3e-50	181
NechaP89106	1963|PHI:1963|GzZC278|I1RR01|5518|Gibberella	32.97	273	168	7	305	565	200	469	3e-32	130
NechaP89106	1963|PHI:1963|GzZC278|I1RR01|5518|Gibberella	28.64	206	128	7	5	198	12	210	6e-13	68.9
NechaP89082	469|PHI:469|TOXG|AAD47837|5017|Cochliobolus	25.54	325	217	13	6	316	33	346	1e-08	53.5
NechaP89085	1863|PHI:1863|GzZC178|I1RL85|5518|Gibberella	27.73	357	211	12	3	352	66	382	1e-23	100
NechaP55962	3126	31.17	308	175	9	24	330	31	302	8e-34	129
NechaP55976	2553|PHI:2553|VPS4|Q5AG40|5476|Candida	31.72	268	147	6	2	236	170	434	3e-36	132
NechaP55951	2968|PHI:2968|Hxs1|J9VQA5|5207|Cryptococcus	22.26	337	239	7	166	488	174	501	2e-11	63.2
NechaP55935	2930|PHI:2930|ctf2|J9MFF7|59765|Fusarium	23.06	399	256	12	2	370	14	391	1e-11	63.9
NechaP55927	2968|PHI:2968|Hxs1|J9VQA5|5207|Cryptococcus	23.47	409	303	6	66	471	62	463	3e-24	103
NechaP55920	748|PHI:748|um00446|Not	32.78	360	202	10	4	341	98	439	6e-43	165
NechaP55920	748|PHI:748|um00446|Not	29.26	311	175	10	547	825	515	812	1e-26	114
NechaP98298	441|PHI:441|BTP1|CAE55153|40559|Botrytis	24.7	247	168	5	79	322	130	361	2e-14	71.2
NechaP55923	716|PHI:716|ZEB1|ABB90284|5518|Fusarium	30.19	583	352	17	23	593	24	563	5e-62	214
NechaP55950	273|PHI:273|SPT3|AAD33888|5476|Candida	32.78	241	149	4	1	229	16	255	1e-39	141
NechaP55916	2237|PHI:2237|Rbf1|Q4P9P1|5270|Ustilago	68.13	91	27	1	1	91	27	115	3e-37	129
NechaP55916	2237|PHI:2237|Rbf1|Q4P9P1|5270|Ustilago	49.23	65	33	0	20	84	16	80	1e-15	69.3
NechaP55916	2237|PHI:2237|Rbf1|Q4P9P1|5270|Ustilago	38.36	73	45	0	1	73	85	157	1e-09	52
NechaP55916	2237|PHI:2237|Rbf1|Q4P9P1|5270|Ustilago	46	50	23	1	50	95	16	65	7e-08	46.6
NechaP55911	438|PHI:438|BcBOT1	23.78	370	256	9	7	370	130	479	9e-24	100
NechaP16483	441|PHI:441|BTP1|CAE55153|40559|Botrytis	25.48	263	181	9	19	273	44	299	4e-17	78.2
NechaP89022	1759|PHI:1759|GzZC074|I1RXS2|5518|Gibberella	22.2	509	320	16	2	456	22	508	6e-13	68.2
NechaP55883	1555|PHI:1555|GzMyb019|I1RDG6|5518|Gibberella	28.22	489	332	6	16	487	58	544	6e-50	178
NechaP55852	2837|PHI:2837|OXI1|D2SZX7|5016|Cochliobolus	30.8	224	133	7	42	250	14	230	1e-20	85.9
NechaP12238	1994|PHI:1994|GzZC309|I1R9S1|5518|Gibberella	39.83	590	321	9	1	567	50	628	6e-135	412
NechaP98282	2025|PHI:2025|HDL1|G4MQZ9|148305|Magnaporthe	36.11	108	63	2	115	216	214	321	8e-12	63.5
NechaP89030	1743|PHI:1743|GzZC058|I1S8J4|5518|Gibberella	46.58	672	302	14	12	637	6	666	0	571
NechaP89031	538|PHI:538|FRT1|AAU87358|40559|Botrytis	26.68	446	296	16	99	529	140	569	6e-25	106
NechaP55882	323|PHI:323|VFGLU1|AAO63562|93591|Verticillium	22.01	268	169	9	23	252	48	313	3e-07	50.1
NechaP98286	105|PHI:105|PLB1|AAC61890|5476|Candida	41.16	588	293	16	27	601	22	569	3e-136	413
NechaP55819	1161|PHI:1161|MgMfs1|A4ZGP3|54734|Mycosphaerella	56.5	508	217	3	2	507	78	583	0	587
NechaP55822	1047|PHI:1047|CTB6|ABK64183|29003|Cercospora	31.91	141	82	3	15	144	4	141	1e-15	74.3
NechaP55847	2175|PHI:2175|NMR3|MGG_09705|148305|Magnaporthe	36.16	318	174	11	5	303	9	316	1e-48	165
NechaP55833	1719|PHI:1719|GzZC034|I1S9U4|5518|Gibberella	34.77	555	317	12	1	519	26	571	5e-99	312
NechaP55811	1719|PHI:1719|GzZC034|I1S9U4|5518|Gibberella	36.9	561	305	12	3	526	9	557	5e-110	341
NechaP55843	1662|PHI:1662|GzCCHC002|I1REJ1|5518|Gibberella	31.35	421	277	6	24	440	642	1054	1e-70	244
NechaP102279	1810|PHI:1810|GzZC125|I1RUJ0|5518|Gibberella	23.04	625	368	22	1	579	1	558	2e-28	117
NechaP98276	1555|PHI:1555|GzMyb019|I1RDG6|5518|Gibberella	32.33	430	284	4	8	433	69	495	2e-64	217
NechaP88991	1556|PHI:1556|GzNH001|I1RZY2|5518|Gibberella	54.86	175	69	3	227	395	15	185	1e-54	181
NechaP98262	2199|PHI:2199|MoRgs8|XP_001405673|148305|Magnaporthe	47.77	561	241	10	14	532	19	569	9e-176	511
NechaP88967	1739|PHI:1739|GzZC054|I1S7B9|5518|Gibberella	40	265	136	4	55	317	150	393	3e-57	204
NechaP88967	1739|PHI:1739|GzZC054|I1S7B9|5518|Gibberella	27.7	148	93	5	353	487	508	654	3e-08	53.9
NechaP98255	3381	37.22	454	277	5	19	469	188	636	8e-83	271
NechaP88969	2533|PHI:2533|FKS1|Q4WLT4|746128|Aspergillus	59.17	1925	683	23	5	1858	12	1904	0	2273
NechaP1729	1809|PHI:1809|GzZC124|I1REW1|5518|Gibberella	31.54	577	330	18	1	528	24	584	2e-70	239
NechaP98257	823|PHI:823|beta-tubulin|CAA56936|38038|Rhynchosporium	83.72	430	70	0	1	430	1	430	0	768
NechaP88986	1689|PHI:1689|GzZC004|I1S018|5518|Gibberella	30.34	323	202	7	94	400	152	467	2e-36	142
NechaP55741	364|PHI:364|MIT1|EAK95175|5476|Candida	41.23	228	107	7	106	323	58	268	7e-48	169
NechaP88959	364|PHI:364|MIT1|EAK95175|5476|Candida	35.71	154	96	3	82	234	58	209	4e-29	115
NechaP88962	223|PHI:223|PEP1|AAK11166|140110|Nectria	42.86	70	40	0	99	168	257	326	6e-12	62.4
NechaP55738	2968|PHI:2968|Hxs1|J9VQA5|5207|Cryptococcus	23.25	456	299	13	64	495	35	463	1e-21	95.5
NechaP88923	4194	23.58	492	298	15	7	451	16	476	2e-28	114
NechaP55718	3225	40.11	379	215	6	1	372	32	405	7e-104	314
NechaP88925	2393|PHI:2393|Related	39.5	119	71	1	195	313	219	336	7e-22	92.8
NechaP19679	1755|PHI:1755|GzZC070|I1S1A5|5518|Gibberella	45.54	101	49	2	5	100	290	389	4e-20	82.8
NechaP19938	1757|PHI:1757|GzZC072|I1RYY1|5518|Gibberella	41.07	56	30	2	1	55	34	87	3e-10	52.8
NechaP88930	1938|PHI:1938|GzZC253|I1RMZ4|5518|Gibberella	26.69	607	352	15	52	600	67	638	7e-59	210
NechaP98245	2802|PHI:2802|3hnr|B2ZRQ4|93612|Setosphaeria	31.46	267	144	10	1	237	10	267	6e-26	101
NechaP88936	2393|PHI:2393|Related	25.79	190	121	6	204	391	232	403	2e-10	59.7
NechaP98246	413|PHI:413|MPD1|AAT84078|13684|Stagonospora	46.15	429	217	6	6	425	11	434	7e-128	378
NechaP55724	3385	54.42	419	188	3	13	428	9	427	6e-160	460
NechaP88939	112|PHI:112|MAK1|AAC49410|140110|Nectria	28.57	406	249	10	2	396	46	421	2e-37	140
NechaP98248	2171|PHI:2171|Peroxisomal	35.01	674	371	15	39	682	32	668	7e-110	350
NechaP88944	1958|PHI:1958|GzZC273|I1RMD1|5518|Gibberella	23.23	297	167	7	252	494	459	748	4e-12	66.6
NechaP88946	4194	23.38	432	295	10	104	517	75	488	2e-23	101
NechaP88947	1046|PHI:1046|CTB5|ABK64182|29003|Cercospora	37.85	214	112	6	57	265	1	198	5e-31	122
NechaP88949	2196|PHI:2196|MoRgs5|XP_363151|148305|Magnaporthe	39.29	112	68	0	297	408	610	721	1e-21	96.7
NechaP88951	2240|PHI:2240|Srt1|Q4PBY9|5270|Ustilago	22.89	450	296	9	73	491	46	475	3e-23	100
NechaP88894	1814|PHI:1814|GzZC129|I1RV04|5518|Gibberella	52.93	820	306	14	4	792	2	772	0	800
NechaP88899	2393|PHI:2393|Related	25.89	197	138	5	293	488	212	401	2e-10	60.1
NechaP88900	2247|PHI:2247|Sch1|EAT82552|13684|Phaeosphaeria	29.82	218	121	7	15	230	38	225	9e-08	50.1
NechaP88902	3126	29.94	314	201	7	9	314	5	307	3e-32	124
NechaP88905	1762|PHI:1762|GzZC077|I1RXJ4|5518|Gibberella	23.06	360	253	10	196	537	240	593	7e-17	81.6
NechaP98229	1047|PHI:1047|CTB6|ABK64183|29003|Cercospora	31.01	287	161	12	2	269	4	272	7e-26	103
NechaP55673	1662|PHI:1662|GzCCHC002|I1REJ1|5518|Gibberella	28.25	485	311	12	3	475	648	1107	9e-59	209
NechaP55664	1910|PHI:1910|GzZC225|I1RHG2|5518|Gibberella	39.39	754	394	19	16	728	6	737	2e-161	486
NechaP73240	1392|PHI:1392|GzC2H055|I1RU67|5518|Gibberella	63.57	582	189	11	1	568	1	573	0	688
NechaP106594	2511|PHI:2511|Pes1|Q4WT66|746128|Aspergillus	47.27	275	137	5	14	284	416	686	6e-76	255
NechaP106594	2511|PHI:2511|Pes1|Q4WT66|746128|Aspergillus	40.12	324	185	6	5	324	4075	4393	3e-74	250
NechaP106594	2511|PHI:2511|Pes1|Q4WT66|746128|Aspergillus	37.5	328	194	5	5	323	2983	3308	1e-66	228
NechaP106594	2511|PHI:2511|Pes1|Q4WT66|746128|Aspergillus	34.76	328	186	7	9	317	1949	2267	3e-51	183
NechaP55638	1862|PHI:1862|GzZC177|I1RL97|5518|Gibberella	27.44	543	327	19	44	535	23	549	1e-49	179
NechaP98226	2227|PHI:2227|pao|D4III8|5270|Ustilago	36.84	76	30	3	40	97	18	93	3e-07	50.1
NechaP64954	2247|PHI:2247|Sch1|EAT82552|13684|Phaeosphaeria	29.37	252	169	6	24	272	35	280	7e-20	84.7
NechaP55600	1420|PHI:1420|GzC2H088|I1S172|5518|Gibberella	22	450	314	17	213	635	198	637	1e-12	68.9
NechaP55610	2315|PHI:2315|ChLae1|G4XKY9|5016|Cochliobolus	33.56	292	185	6	69	354	3	291	2e-49	168
NechaP55529	1133|PHI:1133|Lmepi|B9DR51|5022|Leptosphaeria	36.43	398	179	7	65	434	6	357	4e-65	214
NechaP88738	1046|PHI:1046|CTB5|ABK64182|29003|Cercospora	26.77	467	302	14	62	510	11	455	1e-35	136
NechaP88739	508|PHI:508|AFT1|BAB69076|5599|Alternaria	33.64	107	63	2	129	229	465	569	8e-10	55.5
NechaP106591	144|PHI:144|CHT42|AAC05829|29875|Trichoderma	22.71	273	164	8	96	339	44	298	4e-13	69.7
NechaP14316	2926|PHI:2926|lip3|J9NE50|59765|Fusarium	37.38	214	115	7	50	251	53	259	3e-28	112
NechaP55517	2329|PHI:2329|CTB4|A0ST42|29003|Cercospora	22.73	484	331	14	54	530	57	504	2e-15	76.3
NechaP55503	784|PHI:784|MGG_00056|EDK03390|318829|Magnaporthe	27.5	200	131	5	21	215	20	210	6e-10	56.2
NechaP88750	2034|PHI:2034|MFP1|G4MZY1|148305|Magnaporthe	25.1	247	149	8	15	261	313	523	4e-09	55.1
NechaP55545	1760|PHI:1760|GzZC075|I1RXP9|5518|Gibberella	57.75	774	299	10	1	765	1	755	0	862
NechaP98197	2032|PHI:2032|VTL1|G4NGA7|148305|Magnaporthe	27.55	432	249	17	15	430	35	418	2e-26	110
NechaP98203	881|PHI:881|MGG_04556|EDJ96020|318829|Magnaporthe	28.88	322	211	9	36	356	33	337	6e-31	119
NechaP55481	513|PHI:513|ARN1	25.26	582	401	13	19	575	22	594	2e-44	164
NechaP88762	1924|PHI:1924|GzZC239|I1RH93|5518|Gibberella	24.34	608	347	21	12	519	99	693	5e-25	107
NechaP88763	413|PHI:413|MPD1|AAT84078|13684|Stagonospora	32.42	438	237	20	2	408	11	420	4e-52	181
NechaP88767	668|PHI:668|GNO1|AAP41027|178876|Cryptococcus	27.93	376	244	12	17	384	19	375	3e-30	117
NechaP19236	1260|PHI:1260|FGSG_13944|I1RUC7|5518|Gibberella	30.57	193	127	6	3	195	452	637	9e-13	63.9
NechaP88769	1814|PHI:1814|GzZC129|I1RV04|5518|Gibberella	33.52	522	264	8	227	672	123	637	9e-78	269
NechaP88772	1662|PHI:1662|GzCCHC002|I1REJ1|5518|Gibberella	28.04	453	266	11	62	472	676	1110	2e-43	165
NechaP55526	881|PHI:881|MGG_04556|EDJ96020|318829|Magnaporthe	29.96	257	165	6	1	255	1	244	2e-30	117
NechaP88779	4194	29.73	481	297	11	4	448	1	476	3e-64	216
NechaP88780	1752|PHI:1752|GzZC067|I1RZR8|5518|Gibberella	23.12	519	334	17	67	549	4	493	2e-16	80.9
NechaP55495	3146	26.62	541	337	15	25	549	38	534	1e-43	162
NechaP88782	1942|PHI:1942|GzZC257|I1RG47|5518|Gibberella	25.5	706	438	20	11	693	17	657	1e-44	167
NechaP88783	4194	25.42	177	123	4	323	496	310	480	8e-08	52
NechaP88786	2376|PHI:2376|DEP2|D2E9W7|29001|Alternaria	25.19	397	250	16	3	376	6	378	6e-10	58.2
NechaP98215	2968|PHI:2968|Hxs1|J9VQA5|5207|Cryptococcus	24.11	448	309	11	28	451	23	463	8e-25	104
NechaP55518	1456|PHI:1456|GzAra004|I1RN15|5518|Gibberella	30.23	440	228	14	27	404	315	737	1e-47	173
NechaP88789	1972|PHI:1972|GzZC287|I1RF57|5518|Gibberella	23.17	328	192	10	17	319	11	303	2e-12	67
NechaP55556	419|PHI:419|CSH1|AAP93915|5476|Candida	28.19	298	195	8	13	295	24	317	9e-24	97.4
NechaP55554	2240|PHI:2240|Srt1|Q4PBY9|5270|Ustilago	23.91	481	321	15	53	509	28	487	3e-19	88.2
NechaP55541	1690|PHI:1690|GzZC005|I1S463|5518|Gibberella	27.13	494	285	14	4	470	36	481	1e-49	177
NechaP88798	1935|PHI:1935|GzZC250|I1RFP7|5518|Gibberella	33.78	74	46	2	12	83	51	123	7e-08	50.4
NechaP55537	2959|PHI:2959|mdh|C5BF98|67780|Edwardsiella	48.31	325	152	7	2	324	1	311	7e-89	270
NechaP55419	1662|PHI:1662|GzCCHC002|I1REJ1|5518|Gibberella	65.08	484	149	4	6	488	647	1111	0	646
NechaP88673	1810|PHI:1810|GzZC125|I1RUJ0|5518|Gibberella	26.67	255	155	10	216	460	144	376	6e-12	65.5
NechaP88674	1555|PHI:1555|GzMyb019|I1RDG6|5518|Gibberella	24.36	505	295	20	24	455	53	543	1e-26	110
NechaP55433	2022|PHI:2022|BUF1|MGG_02252|148305|Magnaporthe	28.08	203	125	8	5	205	26	209	7e-19	80.1
NechaP88694	3039	36.67	60	38	0	176	235	554	613	3e-07	49.7
NechaP88695	1269|PHI:1269|FGSG_02838|I1RFK9|5518|Gibberella	24.71	255	170	8	19	258	161	408	3e-14	68.9
NechaP88697	784|PHI:784|MGG_00056|EDK03390|318829|Magnaporthe	27.54	138	85	5	21	144	78	214	8e-09	54.3
NechaP88699	2393|PHI:2393|Related	37.5	80	44	2	4	81	246	321	3e-09	52
NechaP102269	1256|PHI:1256|FGSG_02153|I1RAA6|5518|Gibberella	32.35	306	144	11	468	730	287	572	2e-23	103
NechaP98184	2256|PHI:2256|Xdh1|Q0UA24|13684|Phaeosphaeria	33.5	197	106	9	25	199	31	224	1e-17	80.5
NechaP88713	2247|PHI:2247|Sch1|EAT82552|13684|Phaeosphaeria	32.46	268	154	11	45	310	40	282	9e-22	90.9
NechaP88714	1046|PHI:1046|CTB5|ABK64182|29003|Cercospora	37.1	186	87	6	61	217	4	188	3e-20	90.1
NechaP55446	1939|PHI:1939|GzZC254|I1RMX8|5518|Gibberella	31.82	264	156	8	1	248	1	256	9e-28	108
NechaP55457	1662|PHI:1662|GzCCHC002|I1REJ1|5518|Gibberella	27.37	285	151	8	26	264	688	962	3e-17	81.6
NechaP55464	1161|PHI:1161|MgMfs1|A4ZGP3|54734|Mycosphaerella	26.54	437	295	10	1	421	81	507	3e-40	150
NechaP55455	1458|PHI:1458|GzAra006|Q4I7F9|5518|Gibberella	29.47	190	104	6	143	324	496	663	4e-10	58.2
NechaP88354	1458|PHI:1458|GzAra006|Q4I7F9|5518|Gibberella	33.02	106	69	2	311	415	565	669	2e-10	61.2
NechaP55048	438|PHI:438|BcBOT1	26.38	489	311	16	39	508	41	499	9e-42	155
NechaP22487	1992|PHI:1992|GzZC307|I1R983|5518|Gibberella	31.62	234	148	7	13	239	419	647	1e-24	103
NechaP98099	223|PHI:223|PEP1|AAK11166|140110|Nectria	41.39	302	149	3	7	284	33	330	1e-76	244
NechaP55092	404|PHI:404|PTH11|AAD30436|318829|Magnaporthe	29.01	355	229	6	12	364	63	396	2e-39	147
NechaP55065	3381	23.92	393	254	9	1	372	221	589	8e-11	61.2
NechaP64914	2175|PHI:2175|NMR3|MGG_09705|148305|Magnaporthe	34.73	167	79	9	7	163	9	155	1e-08	53.1
NechaP73198	1936|PHI:1936|GzZC251|I1RFG1|5518|Gibberella	37.74	575	287	14	14	546	9	554	1e-103	331
NechaP73201	1371|PHI:1371|GzC2H034|I1RM60|5518|Gibberella	39.71	272	153	7	10	277	5	269	1e-59	191
NechaP98109	2315|PHI:2315|ChLae1|G4XKY9|5016|Cochliobolus	40	280	149	8	37	298	1	279	1e-59	193
NechaP88427	1346|PHI:1346|GzC2H006|I1RB57|5518|Gibberella	34.83	89	54	2	201	287	63	149	2e-07	47
NechaP102251	1284|PHI:1284|FGSG_13509|I1RI73|5518|Gibberella	30.54	203	118	11	613	800	265	459	2e-13	70.9
NechaP102251	1284|PHI:1284|FGSG_13509|I1RI73|5518|Gibberella	25.86	232	136	8	305	515	30	246	7e-08	53.1
NechaP55194	144|PHI:144|CHT42|AAC05829|29875|Trichoderma	56.2	395	168	4	28	419	25	417	4e-162	466
NechaP55159	1317|PHI:1317|GzBrom002|I1RQE9|5518|Gibberella	37.14	105	64	2	242	344	319	423	2e-15	74.7
NechaP64925	1458|PHI:1458|GzAra006|Q4I7F9|5518|Gibberella	29.46	112	79	0	936	1047	565	676	3e-08	55.1
NechaP88457	3024	38.89	198	115	2	42	238	66	258	9e-45	157
NechaP25351	874|PHI:874|MGG_00435|EDK02952|318829|Magnaporthe	25.64	234	145	8	19	238	33	251	2e-08	52.4
NechaP55169	3415	25.93	270	187	7	149	411	224	487	3e-14	72
NechaP88485	1501|PHI:1501|GzHMG033|I1S4R6|5518|Gibberella	32.67	202	136	0	354	555	246	447	1e-28	115
NechaP55178	144|PHI:144|CHT42|AAC05829|29875|Trichoderma	58.84	413	162	2	20	426	20	430	3e-180	511
NechaP88510	881|PHI:881|MGG_04556|EDJ96020|318829|Magnaporthe	28.57	343	230	6	13	351	2	333	3e-31	119
NechaP55186	2101|PHI:2101|Vacuolar	57.57	469	159	8	2	431	27	494	5e-169	486
NechaP98124	3024	38.78	263	136	4	51	306	104	348	3e-55	187
NechaP88533	2376|PHI:2376|DEP2|D2E9W7|29001|Alternaria	28.28	442	299	10	38	468	8	442	2e-52	189
NechaP16652	144|PHI:144|CHT42|AAC05829|29875|Trichoderma	29.14	302	170	14	1	286	117	390	1e-17	79.7
NechaP12678	1713|PHI:1713|GzZC028|I1RGG4|5518|Gibberella	44.31	492	248	6	6	496	80	546	1e-139	417
NechaP98134	443|PHI:443|CBL1||5518|Fusarium	23.01	352	227	11	82	408	74	406	3e-17	80.5
NechaP88556	191|PHI:191|TOM1|AAB08446|39703|Septoria	33.76	394	195	12	15	352	57	440	3e-49	183
NechaP88556	191|PHI:191|TOM1|AAB08446|39703|Septoria	28.99	276	133	7	576	795	520	788	2e-25	109
NechaP98136	199|PHI:199|AOX1|AAF82788|5499|Cladosporium	37.96	648	330	13	12	599	5	640	2e-140	424
NechaP55359	441|PHI:441|BTP1|CAE55153|40559|Botrytis	26.54	358	220	13	22	353	42	382	2e-25	103
NechaP55230	1887|PHI:1887|GzZC202|I1RHZ6|5518|Gibberella	23.8	332	223	5	41	357	198	514	1e-26	111
NechaP105749	2654|PHI:2654|DUR1,2|Q59VF3|5476|Candida	34.36	163	90	4	122	284	69	214	2e-10	61.2
NechaP55285	2171|PHI:2171|Peroxisomal	35.24	664	385	12	5	652	31	665	9e-119	372
NechaP98146	1337|PHI:1337|GzbZIP019|I1S674|5518|Gibberella	56.32	261	110	2	109	367	179	437	5e-100	306
NechaP55236	1883|PHI:1883|GzZC198|I1RJ71|5518|Gibberella	57.41	54	22	1	12	65	40	92	6e-16	69.7
NechaP88588	2393|PHI:2393|Related	34.07	91	58	2	193	282	302	391	6e-11	60.5
NechaP88592	2844|PHI:2844|BRM2|O93802|5599|Alternaria	32.84	268	158	8	3	257	9	267	2e-34	124
NechaP98155	112|PHI:112|MAK1|AAC49410|140110|Nectria	26.05	357	232	12	3	348	22	357	5e-21	92
NechaP98159	3301	28.11	249	140	8	9	226	12	252	1e-13	65.5
NechaP13000	1711|PHI:1711|GzZC026|I1REQ5|5518|Gibberella	33.84	263	144	8	12	251	166	421	1e-24	103
NechaP88613	1514|PHI:1514|GzHOME012|I1RYV5|5518|Gibberella	45.75	623	280	10	84	658	188	800	2e-162	505
NechaP88613	1514|PHI:1514|GzHOME012|I1RYV5|5518|Gibberella	65.38	78	27	0	739	816	916	993	3e-27	116
NechaP88613	1514|PHI:1514|GzHOME012|I1RYV5|5518|Gibberella	47.62	63	29	1	744	806	796	854	3e-08	54.7
NechaP98163	1963|PHI:1963|GzZC278|I1RR01|5518|Gibberella	28.82	170	114	3	17	183	305	470	1e-15	73.6
NechaP98164	1963|PHI:1963|GzZC278|I1RR01|5518|Gibberella	28.86	201	112	5	35	220	18	202	9e-15	73.2
NechaP73960	225|PHI:225|PEP5|AAK16922|140110|Nectria	100	247	0	0	1	247	1	247	3e-177	489
NechaP64937	4194	26.02	492	314	15	21	483	12	482	1e-38	145
NechaP73962	224|PHI:224|PEP2|AAK11167|140110|Nectria	99.57	233	1	0	1	233	1	233	3e-178	491
NechaP73963	223|PHI:223|PEP1|AAK11166|140110|Nectria	100	330	0	0	1	330	1	330	0	681
NechaP55247	438|PHI:438|BcBOT1	37.9	124	70	3	79	199	287	406	4e-14	68.2
NechaP19176	438|PHI:438|BcBOT1	28.03	157	109	2	1	155	44	198	2e-16	73.9
NechaP88641	1913|PHI:1913|GzZC228|I1RP37|5518|Gibberella	58.54	41	16	1	22	62	24	63	1e-10	60.8
NechaP55271	511|PHI:511|CaNAG4|EAK93098|5476|Candida	23.25	542	350	18	6	524	80	578	4e-19	88.2
NechaP73231	784|PHI:784|MGG_00056|EDK03390|318829|Magnaporthe	25.43	232	152	6	6	224	17	240	2e-07	48.5
NechaP19766	233|PHI:233|TOXE|AAD13811|5017|Cochliobolus	33.73	83	55	0	5	87	294	376	3e-07	44.7
NechaP88655	2240|PHI:2240|Srt1|Q4PBY9|5270|Ustilago	22.89	450	296	9	73	491	46	475	3e-23	100
NechaP88657	2196|PHI:2196|MoRgs5|XP_363151|148305|Magnaporthe	39.29	112	68	0	297	408	610	721	1e-21	96.7
NechaP88659	1046|PHI:1046|CTB5|ABK64182|29003|Cercospora	37.85	214	112	6	57	265	1	198	5e-31	122
NechaP88660	4194	23.38	432	295	10	104	517	75	488	2e-23	101
NechaP54400	419|PHI:419|CSH1|AAP93915|5476|Candida	26.26	179	116	4	20	185	1	176	8e-12	62.4
NechaP87923	1974|PHI:1974|GzZC289|I1RQN6|5518|Gibberella	25.89	448	259	20	8	407	15	437	3e-10	59.7
NechaP97887	2175|PHI:2175|NMR3|MGG_09705|148305|Magnaporthe	35.04	254	145	8	7	240	8	261	8e-33	122
NechaP54383	1835|PHI:1835|GzZC150|I1RIL1|5518|Gibberella	33.27	508	308	10	3	483	53	556	1e-86	279
NechaP54387	2968|PHI:2968|Hxs1|J9VQA5|5207|Cryptococcus	26.01	519	360	12	20	534	8	506	2e-44	163
NechaP87934	404|PHI:404|PTH11|AAD30436|318829|Magnaporthe	24.05	262	184	7	13	268	112	364	2e-13	68.6
NechaP54364	2835|PHI:2835|RED2|C3JXE8|5016|Cochliobolus	37.95	224	127	4	51	272	46	259	3e-38	137
NechaP97892	881|PHI:881|MGG_04556|EDJ96020|318829|Magnaporthe	27.22	327	198	10	26	329	29	338	3e-30	116
NechaP87945	541|PHI:541|LIP1|AAU87359|332648|Botrytis	27.27	517	292	22	153	612	55	544	6e-27	113
NechaP87946	1872|PHI:1872|GzZC187|I1RTU2|5518|Gibberella	24.93	337	201	13	7	307	26	346	3e-13	67.4
NechaP54353	3381	22.05	449	296	7	80	519	250	653	1e-12	67.8
NechaP54349	2240|PHI:2240|Srt1|Q4PBY9|5270|Ustilago	28.03	478	320	8	52	513	24	493	2e-45	166
NechaP87950	748|PHI:748|um00446|Not	31.97	416	228	13	14	384	105	510	1e-47	179
NechaP87950	748|PHI:748|um00446|Not	30.89	314	178	10	554	841	519	819	1e-27	117
NechaP54423	2022|PHI:2022|BUF1|MGG_02252|148305|Magnaporthe	26.32	266	165	9	1	244	26	282	2e-14	68.2
NechaP87953	419|PHI:419|CSH1|AAP93915|5476|Candida	27.94	315	196	8	11	300	1	309	4e-30	115
NechaP54408	2376|PHI:2376|DEP2|D2E9W7|29001|Alternaria	29.18	449	266	12	2	415	6	437	8e-44	159
NechaP54418	1939|PHI:1939|GzZC254|I1RMX8|5518|Gibberella	48.3	176	89	1	1	176	99	272	3e-57	186
NechaP54370	2357|PHI:2357|CYP52X1|E2EAF6|475271|Beauveria	23.33	420	273	12	45	435	90	489	4e-20	90.5
NechaP87977	2315|PHI:2315|ChLae1|G4XKY9|5016|Cochliobolus	33.1	290	188	6	53	337	3	291	8e-49	166
NechaP87982	1047|PHI:1047|CTB6|ABK64183|29003|Cercospora	30.23	86	54	2	5	85	7	91	6e-07	44.7
NechaP97906	881|PHI:881|MGG_04556|EDJ96020|318829|Magnaporthe	26.79	209	142	5	16	216	19	224	2e-17	79
NechaP54362	538|PHI:538|FRT1|AAU87358|40559|Botrytis	23.95	476	325	13	12	472	95	548	3e-18	85.1
NechaP54342	2968|PHI:2968|Hxs1|J9VQA5|5207|Cryptococcus	25.22	464	315	13	4	450	12	460	2e-34	132
NechaP87996	1456|PHI:1456|GzAra004|I1RN15|5518|Gibberella	26.34	448	263	13	45	441	330	761	7e-35	136
NechaP87997	1958|PHI:1958|GzZC273|I1RMD1|5518|Gibberella	22.99	696	387	24	4	610	69	704	2e-26	112
NechaP54365	2597|PHI:2597|Pir32|Q59PW0	25.48	208	133	5	3	188	24	231	2e-07	49.3
NechaP54394	2654|PHI:2654|DUR1,2|Q59VF3|5476|Candida	30.05	213	126	4	108	316	53	246	3e-10	60.5
NechaP88001	2802|PHI:2802|3hnr|B2ZRQ4|93612|Setosphaeria	26.01	296	165	11	5	281	3	263	9e-16	72.8
NechaP54339	2393|PHI:2393|Related	20.29	340	240	8	200	525	120	442	2e-11	63.2
NechaP64790	903|PHI:903|um01888||5270|Ustilago	43.82	477	253	8	34	502	65	534	2e-138	414
NechaP97913	1514|PHI:1514|GzHOME012|I1RYV5|5518|Gibberella	45.09	1191	474	33	10	1080	26	1156	0	879
NechaP88008	1742|PHI:1742|GzZC057|I1S7H5|5518|Gibberella	23.65	203	134	4	29	210	456	658	3e-11	59.3
NechaP88015	1938|PHI:1938|GzZC253|I1RMZ4|5518|Gibberella	29.3	645	386	13	43	672	45	634	4e-71	250
NechaP102188	1235|PHI:1235|FGSG_04416|I1RWQ2|5518|Gibberella	92.14	318	25	0	4	321	28	345	0	599
NechaP54453	143|PHI:143|CHT|AAA33353|5563|Gloeocercospora	39.08	325	170	8	10	319	2	313	7e-67	216
NechaP88022	1916|PHI:1916|GzZC231|I1RSG1|5518|Gibberella	24.62	260	154	8	60	279	227	484	1e-08	53.5
NechaP15701	1555|PHI:1555|GzMyb019|I1RDG6|5518|Gibberella	24.61	321	179	7	8	272	70	383	6e-26	105
NechaP88027	225|PHI:225|PEP5|AAK16922|140110|Nectria	30.3	231	158	3	255	485	9	236	8e-23	96.3
NechaP88030	1844|PHI:1844|GzZC159|I1S708|5518|Gibberella	33.18	431	233	11	24	436	102	495	5e-51	185
NechaP54475	2393|PHI:2393|Related	27.12	472	287	13	62	512	1	436	3e-40	149
NechaP88032	2844|PHI:2844|BRM2|O93802|5599|Alternaria	31.18	263	165	7	3	255	9	265	1e-27	112
NechaP97923	438|PHI:438|BcBOT1	26.19	462	307	8	9	445	20	472	1e-39	148
NechaP54470	1555|PHI:1555|GzMyb019|I1RDG6|5518|Gibberella	25.11	442	319	6	1	438	80	513	7e-45	163
NechaP54479	1161|PHI:1161|MgMfs1|A4ZGP3|54734|Mycosphaerella	23.64	368	259	9	9	362	47	406	2e-10	60.5
NechaP102190	1925|PHI:1925|GzZC240|I1RH59|5518|Gibberella	45.83	72	32	1	5	69	23	94	4e-14	72.8
NechaP88054	3415	25.3	423	222	13	251	653	161	509	6e-27	114
NechaP54524	1396|PHI:1396|GzC2H059|I1RUM9|5518|Gibberella	76.3	730	144	12	1	706	1	725	0	979
NechaP73084	242|PHI:242|CaTPS2|CAC17748|5476|Candida	46.6	867	391	12	28	871	26	843	0	763
NechaP97941	1807|PHI:1807|GzZC122|I1RUM5|5518|Gibberella	85.44	735	95	4	13	738	12	743	0	1257
NechaP54538	538|PHI:538|FRT1|AAU87358|40559|Botrytis	21.53	548	355	14	123	643	104	603	3e-22	98.6
NechaP88068	1424|PHI:1424|GzC2H092|I1S3J7|5518|Gibberella	37.3	319	154	10	3	284	135	444	4e-55	193
NechaP88069	1279|PHI:1279|FGSG_12132|I1RU59|5518|Gibberella	26.25	579	333	26	23	531	40	594	5e-35	141
NechaP19162	1279|PHI:1279|FGSG_12132|I1RU59|5518|Gibberella	39.88	173	90	6	8	173	417	582	1e-30	117
NechaP102195	1400|PHI:1400|GzC2H063|I1RVH0|5518|Gibberella	42.86	63	36	0	171	233	61	123	3e-14	72.8
NechaP54574	1269|PHI:1269|FGSG_02838|I1RFK9|5518|Gibberella	40.82	147	80	4	1	142	20	164	8e-26	99.4
NechaP97943	2839|PHI:2839|RED1|Q8NJQ2|5016|Cochliobolus	29.44	360	223	12	6	350	3	346	8e-36	132
NechaP54505	1046|PHI:1046|CTB5|ABK64182|29003|Cercospora	27.85	456	293	13	61	489	10	456	6e-40	148
NechaP54522	1662|PHI:1662|GzCCHC002|I1REJ1|5518|Gibberella	30.82	425	274	10	22	437	651	1064	2e-62	220
NechaP88078	1709|PHI:1709|GzZC024|I1RR13|5518|Gibberella	24.71	425	251	17	6	407	112	490	2e-20	92.4
NechaP19025	2269|PHI:2269|Mdh1|0|13684|Phaeosphaeria	32.38	210	138	4	26	235	56	261	5e-31	115
NechaP54550	2240|PHI:2240|Srt1|Q4PBY9|5270|Ustilago	24.11	423	293	5	77	494	92	491	3e-27	112
NechaP88084	1280|PHI:1280|FGSG_11614|I1RU62|5518|Gibberella	29.08	478	238	15	471	929	30	425	4e-51	185
NechaP54587	1395|PHI:1395|GzC2H058|I1RUL5|5518|Gibberella	68.14	609	183	4	1	603	1	604	0	820
NechaP54513	1394|PHI:1394|GzC2H057|I1RUL1|5518|Gibberella	51.5	765	290	16	7	761	59	752	0	729
NechaP102197	1875|PHI:1875|GzZC190|I1RTS3|5518|Gibberella	36.96	322	178	7	21	335	29	332	4e-60	205
NechaP54993	1581|PHI:1581|GzOB021|I1RPX8|5518|Gibberella	52.08	265	126	1	5	269	10	273	1e-95	288
NechaP102200	1974|PHI:1974|GzZC289|I1RQN6|5518|Gibberella	25	228	130	7	5	194	8	232	5e-10	58.9
NechaP97964	2194|PHI:2194|MoRgs3|XP_360603|148305|Magnaporthe	46.63	356	143	6	7	319	13	364	2e-99	298
NechaP97965	2174|PHI:2174|NMR2|MGG_02860|148305|Magnaporthe	24.35	271	184	7	2	263	3	261	1e-10	59.7
NechaP88118	1323|PHI:1323|GzbZIP005|I1RGR6|5518|Gibberella	26.56	256	161	6	10	248	16	261	9e-09	53.9
NechaP88119	2835|PHI:2835|RED2|C3JXE8|5016|Cochliobolus	26.04	169	118	3	4	172	85	246	3e-10	57
NechaP54624	2309|PHI:2309|BcatrB|Q9UW03|40559|Botrytis	65.62	1402	466	8	2	1392	43	1439	0	1904
NechaP88126	1555|PHI:1555|GzMyb019|I1RDG6|5518|Gibberella	27.88	434	305	5	62	491	97	526	2e-47	172
NechaP54731	1909|PHI:1909|GzZC224|I1RHG6|5518|Gibberella	24.79	363	214	13	55	397	116	439	2e-19	87.8
NechaP4173	72|PHI:72|SAP2|AAM21050|5476|Candida	33.04	342	186	13	1	323	74	391	2e-37	137
NechaP64817	1810|PHI:1810|GzZC125|I1RUJ0|5518|Gibberella	67.73	409	128	2	2	406	150	558	0	576
NechaP88136	672|PHI:672|CAS1|AAL35099|192011|Cryptococcus	30.92	841	434	24	37	795	47	822	1e-103	343
NechaP54805	1830|PHI:1830|GzZC145|I1RUJ4|5518|Gibberella	52.19	274	130	1	98	371	1	273	3e-102	308
NechaP54715	1161|PHI:1161|MgMfs1|A4ZGP3|54734|Mycosphaerella	24.3	395	274	13	50	426	103	490	9e-16	77.4
NechaP64827	3457	51.74	545	231	8	23	554	4	529	0	538
NechaP88150	1503|PHI:1503|GzHMG035|I1S828|5518|Gibberella	26.3	270	178	7	343	594	239	505	4e-11	63.2
NechaP88152	3383	48.9	319	159	2	7	321	18	336	3e-109	327
NechaP88155	1910|PHI:1910|GzZC225|I1RHG2|5518|Gibberella	24.49	780	445	32	1	706	1	710	2e-38	150
NechaP88163	1974|PHI:1974|GzZC289|I1RQN6|5518|Gibberella	26.94	542	308	19	1	489	1	507	9e-39	146
NechaP88172	1747|PHI:1747|GzZC062|I1S6W1|5518|Gibberella	30.12	259	152	8	1	241	89	336	7e-26	102
NechaP54819	438|PHI:438|BcBOT1	26.69	472	313	13	25	482	35	487	1e-44	163
NechaP54795	404|PHI:404|PTH11|AAD30436|318829|Magnaporthe	26.26	278	160	7	3	244	105	373	2e-17	80.1
NechaP88179	1047|PHI:1047|CTB6|ABK64183|29003|Cercospora	35.67	356	211	10	1	345	1	349	3e-62	203
NechaP88186	1936|PHI:1936|GzZC251|I1RFG1|5518|Gibberella	25.28	538	315	17	22	497	8	520	7e-32	129
NechaP88187	2247|PHI:2247|Sch1|EAT82552|13684|Phaeosphaeria	34.12	170	96	7	7	165	42	206	6e-12	62.8
NechaP97999	1662|PHI:1662|GzCCHC002|I1REJ1|5518|Gibberella	26.2	229	159	3	41	269	653	871	3e-20	91.7
NechaP106567	323|PHI:323|VFGLU1|AAO63562|93591|Verticillium	33.09	417	232	14	1	381	1	406	3e-64	212
NechaP98004	2357|PHI:2357|CYP52X1|E2EAF6|475271|Beauveria	29.07	258	141	9	200	431	255	496	8e-20	91.7
NechaP73130	2895|PHI:2895|F-avi4330|B9JV05|373|Agrobacterium	30.59	219	122	7	2	208	1782	1982	3e-09	56.2
NechaP54623	254|PHI:254|FOW1|BAB85760|5507|Fusarium	26.62	154	93	5	146	287	167	312	1e-07	49.3
NechaP102224	1330|PHI:1330|GzbZIP012|I1RUH0|5518|Gibberella	53.8	171	52	4	46	196	1	164	1e-34	120
NechaP88223	438|PHI:438|BcBOT1	35.44	158	91	6	329	485	316	463	5e-15	74.7
NechaP4143	1233|PHI:1233|FGSG_13944|I1RUG2|5518|Gibberella	86.29	423	56	2	1	423	55	475	0	745
NechaP88234	2968|PHI:2968|Hxs1|J9VQA5|5207|Cryptococcus	24.8	504	337	16	32	510	22	508	8e-33	128
NechaP54810	2087|PHI:2087|Moatg26|MGG_03459|148305|Magnaporthe	60.51	1489	459	29	1	1387	52	1513	0	1693
NechaP88249	1322|PHI:1322|GzbZIP004|I1RG94|5518|Gibberella	50.65	77	38	0	187	263	179	255	5e-21	88.6
NechaP105739	508|PHI:508|AFT1|BAB69076|5599|Alternaria	29.77	524	306	17	103	611	86	562	1e-40	153
NechaP73178	1864|PHI:1864|GzZC179|I1SAX2|5518|Gibberella	40.77	520	272	9	62	571	2	495	1e-132	398
NechaP64899	812|PHI:812|MGG_10702|EDJ94108|318829|Magnaporthe	31.89	323	212	6	26	345	54	371	4e-46	163
NechaP98044	716|PHI:716|ZEB1|ABB90284|5518|Fusarium	48.9	544	265	8	12	548	25	562	0	524
NechaP88258	404|PHI:404|PTH11|AAD30436|318829|Magnaporthe	25.12	418	283	8	27	421	36	446	2e-36	139
NechaP54669	2171|PHI:2171|Peroxisomal	31.69	688	422	18	6	662	26	696	1e-110	350
NechaP54774	2022|PHI:2022|BUF1|MGG_02252|148305|Magnaporthe	33.98	259	156	6	9	257	27	280	3e-39	137
NechaP54879	1811|PHI:1811|GzZC126|I1RUD7|5518|Gibberella	75.57	221	54	0	314	534	174	394	1e-124	373
NechaP54879	1811|PHI:1811|GzZC126|I1RUD7|5518|Gibberella	40.24	169	80	3	16	179	18	170	1e-27	112
NechaP54753	438|PHI:438|BcBOT1	26.6	470	286	16	4	422	17	478	2e-32	126
NechaP88267	1903|PHI:1903|GzZC218|I1RHR4|5518|Gibberella	26.9	420	250	16	7	406	1	383	2e-31	123
NechaP88270	479|PHI:479|MEP1|AAQ07436|199306|Coccidioides	40.47	215	116	9	55	267	57	261	3e-47	162
NechaP106573	2451|PHI:2451|FAEB1|I1S3N8|5518|Gibberella	45.7	291	149	4	2	286	9	296	5e-80	245
NechaP54712	1891|PHI:1891|GzZC206|I1RRM0|5518|Gibberella	26.09	460	297	10	50	488	199	636	7e-39	150
NechaP88283	1161|PHI:1161|MgMfs1|A4ZGP3|54734|Mycosphaerella	24.31	436	276	12	19	420	8	423	4e-18	84.7
NechaP15726	404|PHI:404|PTH11|AAD30436|318829|Magnaporthe	25.27	277	187	9	30	303	128	387	1e-11	62.8
NechaP88288	716|PHI:716|ZEB1|ABB90284|5518|Fusarium	36.6	582	344	9	76	653	2	562	6e-118	365
NechaP88291	1713|PHI:1713|GzZC028|I1RGG4|5518|Gibberella	27.84	510	262	11	62	469	37	542	4e-48	175
NechaP54709	438|PHI:438|BcBOT1	26.98	493	299	15	1	453	1	472	7e-42	155
NechaP1812	2930|PHI:2930|ctf2|J9MFF7|59765|Fusarium	24.9	482	292	12	106	535	238	701	3e-39	150
NechaP54651	2535|PHI:2535|ERG11B	24.75	396	244	11	177	543	148	518	7e-19	87
NechaP54614	2336|PHI:2336|NIA1|O00101|13684|Stagonospora	26.98	467	266	16	19	453	461	884	5e-32	127
NechaP54614	2336|PHI:2336|NIA1|O00101|13684|Stagonospora	33.33	78	47	2	11	88	542	614	7e-07	48.9
NechaP98065	2834|PHI:2834|LAM1|C3PTB1|5016|Cochliobolus	45.49	477	239	8	144	607	6	474	5e-137	409
NechaP54864	1636|PHI:1636|FgFlbB|I1RIG5|5518|Gibberella	70.25	484	134	3	3	486	1	474	0	660
NechaP73184	538|PHI:538|FRT1|AAU87358|40559|Botrytis	31.2	468	310	6	116	580	103	561	4e-57	202
NechaP88312	1695|PHI:1695|GzZC010|I1S2I3|5518|Gibberella	23.74	396	245	13	192	538	160	547	2e-15	76.6
NechaP88315	1662|PHI:1662|GzCCHC002|I1REJ1|5518|Gibberella	30.3	439	294	5	46	482	646	1074	2e-66	233
NechaP98075	479|PHI:479|MEP1|AAQ07436|199306|Coccidioides	51.37	255	114	5	6	256	25	273	1e-86	260
NechaP88319	1959|PHI:1959|GzZC274|I1RM85|5518|Gibberella	26.23	427	241	14	281	689	126	496	3e-22	99
NechaP54877	191|PHI:191|TOM1|AAB08446|39703|Septoria	34.37	387	191	10	1	332	57	435	9e-50	185
NechaP54877	191|PHI:191|TOM1|AAB08446|39703|Septoria	33.82	272	139	8	579	814	521	787	3e-32	131
NechaP54845	2240|PHI:2240|Srt1|Q4PBY9|5270|Ustilago	24.14	464	288	10	48	462	43	491	2e-21	95.1
NechaP88322	468|PHI:468|EPA1|AAQ82691|5478|Candida	30.63	111	76	1	693	803	140	249	3e-11	64.3
NechaP54734	1047|PHI:1047|CTB6|ABK64183|29003|Cercospora	34.62	130	77	3	13	134	4	133	2e-14	70.9
NechaP13089	1763|PHI:1763|GzZC078|I1RXE8|5518|Gibberella	41.1	511	276	8	1	491	133	638	8e-127	387
NechaP106576	748|PHI:748|um00446|Not	42.15	650	336	11	33	670	77	698	2e-154	475
NechaP102239	1047|PHI:1047|CTB6|ABK64183|29003|Cercospora	33.82	346	218	7	1	337	1	344	1e-63	207
NechaP55037	2315|PHI:2315|ChLae1|G4XKY9|5016|Cochliobolus	25.83	120	88	1	10	128	171	290	3e-15	67.8
NechaP55027	2247|PHI:2247|Sch1|EAT82552|13684|Phaeosphaeria	33.96	265	169	4	7	268	15	276	5e-36	130
NechaP73192	1047|PHI:1047|CTB6|ABK64183|29003|Cercospora	28.44	211	130	6	1	195	1	206	2e-13	67.8
NechaP88337	1662|PHI:1662|GzCCHC002|I1REJ1|5518|Gibberella	22.22	486	314	9	16	453	599	1068	2e-32	129
NechaP98088	2038|PHI:2038|Mir1|MGG_02370|148305|Magnaporthe	22.85	267	176	8	12	259	23	278	2e-07	48.5
NechaP55035	1879|PHI:1879|GzZC194|I1RJB8|5518|Gibberella	65.3	856	205	17	16	781	32	885	0	1058
NechaP64912	1159|PHI:1159|MgAtr7|A5H456|54734|Mycosphaerella	45.12	164	89	1	1	163	1646	1809	5e-45	158
NechaP55015	748|PHI:748|um00446|Not	35.93	167	99	2	5	168	112	273	1e-24	98.6
NechaP55040	2849|PHI:2849|cutA|Q99174|70790|Fusarium	54.71	223	101	0	1	223	1	223	4e-84	251
NechaP52827	143|PHI:143|CHT|AAA33353|5563|Gloeocercospora	35.03	314	188	4	9	312	7	314	3e-65	210
NechaP52845	2745|PHI:2745|treY|Q02LV5|287|Pseudomonas	35.21	71	45	1	50	119	25	95	6e-08	52.8
NechaP87060	2240|PHI:2240|Srt1|Q4PBY9|5270|Ustilago	27.39	471	333	6	67	533	46	511	6e-41	153
NechaP97478	1787|PHI:1787|GzZC102|I1S1P9|5518|Gibberella	69.44	481	121	6	1	457	1	479	0	678
NechaP52943	352|PHI:352|GLO1|CAD79488|5270|Ustilago	27.53	563	298	24	444	910	84	632	9e-39	152
NechaP52988	1950|PHI:1950|GzZC265|I1RDP6|5518|Gibberella	30.14	511	311	13	5	482	23	520	1e-58	202
NechaP52835	3126	22.92	349	244	11	83	424	73	403	1e-15	75.5
NechaP87072	1878|PHI:1878|GzZC193|I1RPF6|5518|Gibberella	22.95	440	264	10	155	523	200	635	1e-23	103
NechaP52952	576|PHI:576|NoxA|BAE72680|35717|Epichloe	71.2	559	155	3	5	560	2	557	0	861
NechaP87075	419|PHI:419|CSH1|AAP93915|5476|Candida	26.56	320	213	9	27	327	1	317	2e-26	105
NechaP52950	479|PHI:479|MEP1|AAQ07436|199306|Coccidioides	38.73	284	143	13	6	276	9	274	5e-52	172
NechaP87077	1825|PHI:1825|GzZC140|I1RY88|5518|Gibberella	27.81	543	324	5	48	549	42	557	6e-69	233
NechaP52825	1963|PHI:1963|GzZC278|I1RR01|5518|Gibberella	31.54	130	87	1	50	179	343	470	9e-17	77
NechaP52972	1963|PHI:1963|GzZC278|I1RR01|5518|Gibberella	32.5	160	79	7	26	160	18	173	1e-11	61.6
NechaP87084	1791|PHI:1791|GzZC106|I1RVN8|5518|Gibberella	42.45	106	54	5	271	372	384	486	4e-13	68.2
NechaP97495	1048|PHI:1048|CTB7|ABK64184|29003|Cercospora	28.67	443	246	15	5	402	7	424	2e-38	143
NechaP52860	441|PHI:441|BTP1|CAE55153|40559|Botrytis	24.53	265	186	7	19	275	44	302	2e-15	74.3
NechaP87097	922|PHI:922|um03615||5270|Ustilago	36.22	613	329	16	35	609	84	672	1e-98	317
NechaP97501	112|PHI:112|MAK1|AAC49410|140110|Nectria	25.8	407	266	13	12	401	22	409	8e-25	103
NechaP52921	1708|PHI:1708|GzZC023|I1RP73|5518|Gibberella	42.54	623	321	11	32	638	6	607	3e-158	470
NechaP87111	2393|PHI:2393|Related	20	475	311	9	72	527	9	433	1e-15	77
NechaP97506	2844|PHI:2844|BRM2|O93802|5599|Alternaria	22.89	284	180	5	7	275	4	263	1e-14	69.7
NechaP52907	1976|PHI:1976|GzZC291|I1RLP8|5518|Gibberella	47.26	402	183	8	17	413	17	394	4e-119	355
NechaP97509	1555|PHI:1555|GzMyb019|I1RDG6|5518|Gibberella	44.27	506	278	3	88	591	41	544	4e-156	461
NechaP52876	2315|PHI:2315|ChLae1|G4XKY9|5016|Cochliobolus	35.05	291	180	7	36	320	4	291	2e-51	172
NechaP13130	2000|PHI:2000|GzZC315|I1R9D4|5518|Gibberella	62.14	523	180	5	3	508	11	532	0	664
NechaP87129	2240|PHI:2240|Srt1|Q4PBY9|5270|Ustilago	30.67	150	102	1	224	373	354	501	7e-13	67.4
NechaP97514	2968|PHI:2968|Hxs1|J9VQA5|5207|Cryptococcus	27.66	488	315	12	18	492	12	474	7e-41	152
NechaP87133	2926|PHI:2926|lip3|J9NE50|59765|Fusarium	78.78	542	109	3	2	542	1	537	0	901
NechaP52870	441|PHI:441|BTP1|CAE55153|40559|Botrytis	25.22	341	214	10	8	311	34	370	1e-16	77.8
NechaP87137	1282|PHI:1282|FGSG_07745|I1S9H8|5518|Gibberella	25.59	422	265	15	33	427	245	644	6e-30	125
NechaP87138	1279|PHI:1279|FGSG_12132|I1RU59|5518|Gibberella	29.71	478	269	15	178	635	112	542	5e-52	190
NechaP87139	1918|PHI:1918|GzZC233|I1RT69|5518|Gibberella	80.13	156	22	2	10	162	176	325	1e-68	247
NechaP87154	2968|PHI:2968|Hxs1|J9VQA5|5207|Cryptococcus	26.18	466	271	12	28	429	12	468	3e-36	137
NechaP87156	1944|PHI:1944|GzZC259|I1RFR7|5518|Gibberella	24.03	362	204	15	257	593	353	668	3e-13	69.7
NechaP87156	1944|PHI:1944|GzZC259|I1RFR7|5518|Gibberella	31.19	109	61	4	20	115	13	120	9e-07	49.3
NechaP64568	2315|PHI:2315|ChLae1|G4XKY9|5016|Cochliobolus	36.18	293	170	7	54	333	2	290	1e-55	184
NechaP6337	860|PHI:860|MSP1|AAX07670|318829|Magnaporthe	37.39	238	143	2	1	232	108	345	3e-45	156
NechaP87166	1380|PHI:1380|GzC2H043|I1RRG4|5518|Gibberella	28.44	211	133	7	21	215	110	318	9e-14	68.9
NechaP87166	1380|PHI:1380|GzC2H043|I1RRG4|5518|Gibberella	34.43	122	74	4	49	166	109	228	5e-12	63.9
NechaP87166	1380|PHI:1380|GzC2H043|I1RRG4|5518|Gibberella	28.16	174	88	7	49	216	79	221	1e-08	53.1
NechaP53137	3038	22.3	444	289	14	68	484	87	501	9e-17	80.1
NechaP87170	1738|PHI:1738|GzZC053|I1S4B9|5518|Gibberella	27.32	582	356	15	14	576	8	541	4e-63	218
NechaP102077	2183|PHI:2183|CPXB|EHA48040.1|148305|Magnaporthe	73.28	786	204	4	1	781	1	785	0	1155
NechaP106504	3095	72.47	316	87	0	2	317	106	421	0	513
NechaP87177	2315|PHI:2315|ChLae1|G4XKY9|5016|Cochliobolus	32.65	291	189	5	67	351	3	292	7e-50	169
NechaP87181	413|PHI:413|MPD1|AAT84078|13684|Stagonospora	25.66	452	270	17	3	424	11	426	1e-23	100
NechaP72849	3301	25.39	193	130	8	11	198	13	196	4e-07	47.4
NechaP53126	2357|PHI:2357|CYP52X1|E2EAF6|475271|Beauveria	30.45	220	136	6	278	491	304	512	5e-14	71.6
NechaP87192	2644|PHI:2644|thioredoxin	35	100	63	1	32	131	2	99	6e-20	79.3
NechaP19448	1447|PHI:1447|GzGATA005|I1RUP1|5518|Gibberella	66.89	148	49	0	1	148	337	484	3e-70	227
NechaP53068	1662|PHI:1662|GzCCHC002|I1REJ1|5518|Gibberella	30.53	475	294	11	24	484	614	1066	3e-64	226
NechaP87205	1739|PHI:1739|GzZC054|I1S7B9|5518|Gibberella	35.35	99	54	2	2	100	10	98	1e-10	61.6
NechaP97537	419|PHI:419|CSH1|AAP93915|5476|Candida	23.86	306	185	9	24	299	8	295	1e-18	82.4
NechaP53101	2269|PHI:2269|Mdh1|0|13684|Phaeosphaeria	31.46	267	169	8	4	266	5	261	3e-25	100
NechaP53111	181|PHI:181|PGX1|AAK81847|5507|Fusarium	81.12	429	80	1	26	454	28	455	0	721
NechaP53038	1755|PHI:1755|GzZC070|I1S1A5|5518|Gibberella	36.36	572	327	9	14	554	8	573	1e-125	385
NechaP72858	255|PHI:255|FUM1	39.2	2607	1373	49	60	2519	31	2572	0	1696
NechaP53052	2247|PHI:2247|Sch1|EAT82552|13684|Phaeosphaeria	30.77	195	110	6	4	185	40	222	2e-12	63.9
NechaP53044	55|PHI:55|PKS1|AAB08104|5016|Cochliobolus	26.64	229	149	7	32	248	1847	2068	3e-13	68.6
NechaP53166	1260|PHI:1260|FGSG_13944|I1RUC7|5518|Gibberella	31.09	119	80	1	49	165	437	555	7e-10	54.7
NechaP53166	1260|PHI:1260|FGSG_13944|I1RUC7|5518|Gibberella	29.37	126	89	0	40	165	463	588	4e-08	49.3
NechaP97545	3128	36.24	149	86	4	3	149	4	145	2e-21	87.8
NechaP52994	180|PHI:180|PELD|AAC49420|140110|Nectria	79.4	233	46	1	1	231	1	233	6e-139	390
NechaP53061	923|PHI:923|um03616||5270|Ustilago	23.55	467	212	22	7	363	266	697	1e-13	70.1
NechaP53012	1552|PHI:1552|GzMyb016|I1S0N5|5518|Gibberella	27.12	306	197	10	164	458	171	461	7e-22	98.2
NechaP53012	1552|PHI:1552|GzMyb016|I1S0N5|5518|Gibberella	30.52	154	99	4	535	684	468	617	1e-14	74.7
NechaP102084	1420|PHI:1420|GzC2H088|I1S172|5518|Gibberella	23.86	591	364	16	325	859	260	820	3e-32	133
NechaP102084	1420|PHI:1420|GzC2H088|I1S172|5518|Gibberella	30.16	126	84	2	16	138	15	139	6e-12	67.4
NechaP53159	1701|PHI:1701|GzZC016|I1RKS9|5518|Gibberella	47.8	454	218	3	5	440	27	479	2e-149	438
NechaP72861	2315|PHI:2315|ChLae1|G4XKY9|5016|Cochliobolus	33.11	293	185	7	66	351	3	291	5e-48	164
NechaP53037	397|PHI:397|LAC2|AAV64894|5207|Cryptococcus	29.28	526	284	18	96	558	59	559	2e-47	173
NechaP87250	1381|PHI:1381|GzC2H044|I1RRI0|5518|Gibberella	44.8	221	102	3	389	589	291	511	9e-55	194
NechaP53003	267|PHI:267|MLT1|AAD51594|5476|Candida	27.15	1219	735	28	1	1085	375	1574	1e-115	392
NechaP53179	901|PHI:901|um01886||5270|Ustilago	26.32	380	242	9	31	385	140	506	5e-41	150
NechaP26554	2315|PHI:2315|ChLae1|G4XKY9|5016|Cochliobolus	37.54	293	171	8	63	348	3	290	4e-53	177
NechaP87262	1930|PHI:1930|GzZC245|I1RER7|5518|Gibberella	23.42	269	135	7	1	213	18	271	7e-12	63.5
NechaP53006	1047|PHI:1047|CTB6|ABK64183|29003|Cercospora	27.91	215	129	9	12	212	4	206	2e-12	63.2
NechaP72877	397|PHI:397|LAC2|AAV64894|5207|Cryptococcus	31.56	583	352	14	94	660	27	578	2e-90	294
NechaP87276	4194	27.8	482	286	18	78	512	14	480	2e-41	154
NechaP102094	544|PHI:544|BCMFS1|AAF64435|332648|Botrytis	22.97	431	294	14	4	411	39	454	7e-15	74.7
NechaP5106	1736|PHI:1736|GzZC051|I1S4F3|5518|Gibberella	24.08	407	259	12	11	377	90	486	8e-12	63.9
NechaP53054	3387	31.34	201	104	8	30	224	1732	1904	8e-12	63.9
NechaP53235	2837|PHI:2837|OXI1|D2SZX7|5016|Cochliobolus	37.33	225	133	4	39	257	7	229	1e-36	130
NechaP53260	2174|PHI:2174|NMR2|MGG_02860|148305|Magnaporthe	26.83	123	86	2	5	125	5	125	1e-07	50.1
NechaP64609	3415	23.99	296	162	9	281	532	182	458	6e-18	85.1
NechaP72896	2266|PHI:2266|Ptr2|0|13684|Phaeosphaeria	36.75	566	341	7	4	557	18	578	6e-123	377
NechaP53227	270|PHI:270|RHO1|BAA24262|5476|Candida	44.88	127	70	0	1	127	57	183	1e-36	125
NechaP97579	2315|PHI:2315|ChLae1|G4XKY9|5016|Cochliobolus	30.9	288	190	7	40	324	3	284	6e-45	155
NechaP53292	740|PHI:740|BeNEP1|ABB43265|278938|Botrytis	56.85	241	98	2	6	243	8	245	1e-96	284
NechaP97581	547|PHI:547|CEL5A|AAT40313|40559|Botrytis	54.9	306	133	4	84	384	118	423	2e-117	349
NechaP87315	4194	26.8	194	125	6	290	479	295	475	1e-10	60.8
NechaP53223	538|PHI:538|FRT1|AAU87358|40559|Botrytis	22.86	560	348	21	24	543	95	610	4e-17	81.6
NechaP102105	521|PHI:521|CgDN24|AAB92223|5457|Colletotrichum	80.39	51	10	0	95	145	135	185	3e-10	55.8
NechaP102106	1555|PHI:1555|GzMyb019|I1RDG6|5518|Gibberella	24.17	360	243	6	12	350	43	393	3e-29	117
NechaP53239	2927|PHI:2927|lip5|J9N2Z8|59765|Fusarium	66.67	537	174	2	3	537	1	534	0	751
NechaP53334	3225	44.44	351	188	5	1	346	4	352	1e-110	330
NechaP102108	1413|PHI:1413|GzC2H080|I1RZD4|5518|Gibberella	24.19	583	362	18	434	980	449	987	2e-40	159
NechaP102108	1413|PHI:1413|GzC2H080|I1RZD4|5518|Gibberella	43.48	92	49	1	8	96	36	127	8e-13	69.7
NechaP87338	112|PHI:112|MAK1|AAC49410|140110|Nectria	28.5	414	267	15	10	419	14	402	6e-31	121
NechaP87341	413|PHI:413|MPD1|AAT84078|13684|Stagonospora	20.79	356	240	14	15	340	2	345	8e-07	48.9
NechaP64633	2269|PHI:2269|Mdh1|0|13684|Phaeosphaeria	37.01	254	151	6	6	254	15	264	4e-40	139
NechaP87344	1555|PHI:1555|GzMyb019|I1RDG6|5518|Gibberella	26.51	464	312	11	35	473	74	533	2e-39	147
NechaP97598	1835|PHI:1835|GzZC150|I1RIL1|5518|Gibberella	70.75	629	168	3	45	661	8	632	0	939
NechaP53266	2844|PHI:2844|BRM2|O93802|5599|Alternaria	28.12	256	159	11	9	250	10	254	5e-16	72.8
NechaP53304	1555|PHI:1555|GzMyb019|I1RDG6|5518|Gibberella	23.63	491	318	11	49	508	69	533	2e-38	145
NechaP53241	1949|PHI:1949|GzZC264|I1RI60|5518|Gibberella	51.69	356	143	6	1	333	1	350	6e-121	357
NechaP53268	2247|PHI:2247|Sch1|EAT82552|13684|Phaeosphaeria	28.62	283	164	10	24	295	15	270	1e-21	90.1
NechaP53240	2837|PHI:2837|OXI1|D2SZX7|5016|Cochliobolus	39.91	228	130	3	39	261	6	231	7e-52	169
NechaP53430	133|PHI:133|AKT1|BAA36588|5599|Alternaria	41.39	575	314	11	1	565	1	562	3e-142	426
NechaP53484	2393|PHI:2393|Related	37.95	477	234	8	50	513	1	428	1e-105	325
NechaP87371	404|PHI:404|PTH11|AAD30436|318829|Magnaporthe	26.26	198	110	5	133	302	184	373	2e-16	78.2
NechaP53663	1828|PHI:1828|GzZC143|I1S351|5518|Gibberella	32.98	376	208	10	1	336	228	599	2e-48	173
NechaP53519	419|PHI:419|CSH1|AAP93915|5476|Candida	23.76	202	127	4	8	186	24	221	1e-08	52.8
NechaP87379	2393|PHI:2393|Related	25.05	475	293	15	60	515	6	436	3e-34	132
NechaP53596	2928|PHI:2928|lip22|J9NNZ8|59765|Fusarium	43.6	406	210	5	28	422	30	427	1e-109	332
NechaP53382	1856|PHI:1856|GzZC171|I1S377|5518|Gibberella	26.01	419	266	12	3	399	60	456	3e-30	118
NechaP97619	26|PHI:26|CaMDR1|CAA37820|5476|Candida	32.84	475	296	10	16	477	95	559	2e-75	248
NechaP87386	405|PHI:405|PDE1|AAK07740|318829|Magnaporthe	42.91	874	412	21	454	1252	612	1473	0	611
NechaP87386	405|PHI:405|PDE1|AAK07740|318829|Magnaporthe	47.03	472	208	4	7	437	42	512	5e-134	447
NechaP53444	4194	28.48	467	272	15	2	432	15	455	3e-51	180
NechaP53697	1730|PHI:1730|GzZC045|I1S6C7|5518|Gibberella	73.55	707	171	7	246	946	17	713	0	1059
NechaP87396	1675|PHI:1675|GzDHHC003|Q4I8B6|5518|Gibberella	25.51	247	140	6	374	601	37	258	1e-10	61.6
NechaP53410	1662|PHI:1662|GzCCHC002|I1REJ1|5518|Gibberella	41	422	217	4	40	460	69	459	4e-94	313
NechaP53539	1953|PHI:1953|GzZC268|I1RKB4|5518|Gibberella	44	425	199	5	3	392	20	440	2e-116	352
NechaP87404	1982|PHI:1982|GzZC297|I1RIT3|5518|Gibberella	65.41	688	223	4	14	692	19	700	0	930
NechaP53442	413|PHI:413|MPD1|AAT84078|13684|Stagonospora	28.24	393	227	13	7	364	11	383	8e-27	108
NechaP64655	2315|PHI:2315|ChLae1|G4XKY9|5016|Cochliobolus	38.06	289	173	6	46	328	2	290	4e-54	179
NechaP53378	1662|PHI:1662|GzCCHC002|I1REJ1|5518|Gibberella	33.47	472	285	6	20	476	653	1110	2e-86	290
NechaP53661	541|PHI:541|LIP1|AAU87359|332648|Botrytis	36.9	290	139	14	33	299	56	324	3e-36	139
NechaP53620	2377|PHI:2377|DEP3|D2E9W8|29001|Alternaria	64.3	493	176	0	3	495	55	547	0	638
NechaP87420	2380|PHI:2380|DEP6|D2E9X1|29001|Alternaria	33.75	634	378	16	9	611	15	637	2e-95	307
NechaP87421	3381	50.71	562	252	2	19	580	155	691	0	555
NechaP87425	3387	26.12	134	93	4	112	240	1791	1923	6e-07	48.5
NechaP97645	2731|PHI:2731|VdSge1|G2XD29|27337|Verticillium	54.42	509	232	0	25	533	64	572	0	571
NechaP97646	1046|PHI:1046|CTB5|ABK64182|29003|Cercospora	31.53	463	285	9	81	520	3	456	3e-58	201
NechaP64661	2836|PHI:2836|RED3|C3JXE9|5016|Cochliobolus	56.92	130	56	0	31	160	67	196	3e-46	153
NechaP22481	1260|PHI:1260|FGSG_13944|I1RUC7|5518|Gibberella	34.07	135	81	4	482	611	468	599	8e-09	55.8
NechaP87433	922|PHI:922|um03615||5270|Ustilago	28.55	557	318	14	9	543	142	640	2e-49	180
NechaP87435	1381|PHI:1381|GzC2H044|I1RRI0|5518|Gibberella	77.31	119	27	0	349	467	290	408	7e-65	218
NechaP53503	1772|PHI:1772|GzZC087|I1S053|5518|Gibberella	36.87	198	106	2	15	193	447	644	1e-37	136
NechaP53569	1724|PHI:1724|GzZC039|I1SAE9|5518|Gibberella	57.41	479	198	3	87	562	197	672	0	581
NechaP53569	1724|PHI:1724|GzZC039|I1SAE9|5518|Gibberella	62.79	43	16	0	7	49	12	54	4e-12	65.9
NechaP53468	1423|PHI:1423|GzC2H091|I1S2R1|5518|Gibberella	43.08	318	164	7	20	330	124	431	9e-80	258
NechaP53386	1047|PHI:1047|CTB6|ABK64183|29003|Cercospora	27.85	316	186	13	13	308	4	297	4e-17	79
NechaP4612	413|PHI:413|MPD1|AAT84078|13684|Stagonospora	24.2	438	283	13	6	416	11	426	1e-26	108
NechaP87447	1662|PHI:1662|GzCCHC002|I1REJ1|5518|Gibberella	24.81	258	153	7	2	241	623	857	7e-17	81.3
NechaP53415	3236	25.33	454	280	18	36	453	95	525	8e-26	108
NechaP53463	3213	75.43	346	85	0	9	354	10	355	0	513
NechaP72948	191|PHI:191|TOM1|AAB08446|39703|Septoria	31.41	433	215	9	7	363	54	480	6e-49	183
NechaP72948	191|PHI:191|TOM1|AAB08446|39703|Septoria	32.07	290	155	9	566	823	513	792	2e-30	125
NechaP53390	2968|PHI:2968|Hxs1|J9VQA5|5207|Cryptococcus	27.89	398	266	11	86	475	79	463	9e-26	107
NechaP87455	1046|PHI:1046|CTB5|ABK64182|29003|Cercospora	30.11	176	103	4	41	197	17	191	2e-18	85.1
NechaP87457	2315|PHI:2315|ChLae1|G4XKY9|5016|Cochliobolus	35.48	279	161	6	55	314	1	279	4e-53	177
NechaP97659	413|PHI:413|MPD1|AAT84078|13684|Stagonospora	23.73	236	164	5	54	282	157	383	2e-20	89
NechaP53495	438|PHI:438|BcBOT1	22.95	536	315	19	21	538	35	490	7e-33	129
NechaP53532	438|PHI:438|BcBOT1	26.33	433	298	7	30	444	43	472	7e-43	157
NechaP87469	438|PHI:438|BcBOT1	24.95	493	309	16	1	460	1	465	4e-32	125
NechaP87471	1723|PHI:1723|GzZC038|I1S832|5518|Gibberella	31.19	202	104	7	3	188	24	206	6e-20	92.4
NechaP87471	1723|PHI:1723|GzZC038|I1S832|5518|Gibberella	25.35	213	147	4	391	595	390	598	8e-08	53.1
NechaP72954	1714|PHI:1714|GzZC029|I1RQU8|5518|Gibberella	58.5	682	258	8	1	669	21	690	0	801
NechaP53600	2393|PHI:2393|Related	23.74	455	305	11	72	506	9	441	4e-26	108
NechaP105674	2315|PHI:2315|ChLae1|G4XKY9|5016|Cochliobolus	35.05	291	181	6	56	338	2	292	1e-55	184
NechaP87478	541|PHI:541|LIP1|AAU87359|332648|Botrytis	30.62	565	318	23	20	547	33	560	2e-48	176
NechaP87480	2821|PHI:2821|SNF2|Q5ALP9|5476|Candida	28.16	309	167	12	371	660	804	1076	2e-20	94.7
NechaP87480	2821|PHI:2821|SNF2|Q5ALP9|5476|Candida	34.65	127	79	3	797	920	1119	1244	2e-16	81.6
NechaP87481	1420|PHI:1420|GzC2H088|I1S172|5518|Gibberella	21.61	671	408	27	256	849	194	823	1e-19	92.4
NechaP53445	1046|PHI:1046|CTB5|ABK64182|29003|Cercospora	25	172	121	2	75	238	15	186	2e-10	60.1
NechaP87483	441|PHI:441|BTP1|CAE55153|40559|Botrytis	25.22	341	201	14	30	351	42	347	4e-11	61.2
NechaP102131	184|PHI:184|RBT4|AAG09789|5476|Candida	37.4	131	73	4	118	245	216	340	4e-14	68.2
NechaP53641	2261|PHI:2261|NPS6|G8DNS9|45130|Cochliobolus	41.08	1278	695	20	35	1294	73	1310	0	961
NechaP53641	2261|PHI:2261|NPS6|G8DNS9|45130|Cochliobolus	33.4	515	333	8	1561	2068	1420	1931	7e-75	275
NechaP53641	2261|PHI:2261|NPS6|G8DNS9|45130|Cochliobolus	29.88	686	395	24	1330	1976	554	1192	5e-67	249
NechaP53641	2261|PHI:2261|NPS6|G8DNS9|45130|Cochliobolus	27.66	488	316	12	765	1235	1418	1885	4e-32	135
NechaP53641	2261|PHI:2261|NPS6|G8DNS9|45130|Cochliobolus	48.33	60	31	0	1558	1617	1346	1405	4e-09	59.3
NechaP53358	2322|PHI:2322|SidH|Q4WF54|746128|Aspergillus	47.33	281	131	5	11	291	7	270	2e-82	250
NechaP53625	513|PHI:513|ARN1	23.16	583	420	9	13	582	5	572	3e-47	173
NechaP102133	438|PHI:438|BcBOT1	24.77	222	161	4	241	458	258	477	1e-14	73.6
NechaP87494	1714|PHI:1714|GzZC029|I1RQU8|5518|Gibberella	24.76	517	328	12	100	600	178	649	2e-36	142
NechaP53387	4194	22.63	464	309	11	35	474	38	475	5e-27	111
NechaP87500	2909|PHI:2909|CYP51C|I1S2M5|5518|Fusarium	22.8	386	241	14	150	503	156	516	8e-18	83.6
NechaP64691	2022|PHI:2022|BUF1|MGG_02252|148305|Magnaporthe	26.43	280	170	8	18	286	26	280	6e-15	70.9
NechaP87507	1260|PHI:1260|FGSG_13944|I1RUC7|5518|Gibberella	29.91	214	119	7	818	1027	451	637	1e-09	60.8
NechaP25244	1903|PHI:1903|GzZC218|I1RHR4|5518|Gibberella	67.19	381	108	5	1	377	1	368	1e-179	508
NechaP87517	2025|PHI:2025|HDL1|G4MQZ9|148305|Magnaporthe	28.35	127	76	2	89	200	215	341	3e-08	52.4
NechaP53466	544|PHI:544|BCMFS1|AAF64435|332648|Botrytis	25.11	450	303	9	8	436	109	545	4e-30	120
NechaP53615	1555|PHI:1555|GzMyb019|I1RDG6|5518|Gibberella	29.17	432	287	9	14	436	93	514	4e-45	164
NechaP87525	1773|PHI:1773|GzZC088|I1S409|5518|Gibberella	25	296	186	8	56	335	115	390	5e-17	79.3
NechaP53594	2968|PHI:2968|Hxs1|J9VQA5|5207|Cryptococcus	27.58	475	323	11	66	531	12	474	9e-36	137
NechaP87530	922|PHI:922|um03615||5270|Ustilago	28.67	600	354	21	2	538	83	671	3e-47	173
NechaP87531	874|PHI:874|MGG_00435|EDK02952|318829|Magnaporthe	22.46	285	179	6	34	285	31	306	1e-12	66.2
NechaP87533	2315|PHI:2315|ChLae1|G4XKY9|5016|Cochliobolus	30.77	208	116	7	111	293	3	207	8e-24	97.1
NechaP97703	2357|PHI:2357|CYP52X1|E2EAF6|475271|Beauveria	23.13	454	283	16	55	476	77	496	3e-17	82
NechaP102141	1946|PHI:1946|GzZC261|I1RGI7|5518|Gibberella	42.22	90	39	2	3	91	12	89	1e-14	73.2
NechaP64703	2266|PHI:2266|Ptr2|0|13684|Phaeosphaeria	59.15	590	225	5	3	582	14	597	0	704
NechaP97708	1071|PHI:1071|Gas1|CAF05793|5270|Ustilago	23.95	526	265	16	327	833	402	811	4e-30	126
NechaP53587	2315|PHI:2315|ChLae1|G4XKY9|5016|Cochliobolus	35.86	290	180	4	19	302	2	291	2e-60	195
NechaP53469	1662|PHI:1662|GzCCHC002|I1REJ1|5518|Gibberella	26.53	441	295	11	62	490	652	1075	2e-42	161
NechaP87563	59|PHI:59|THR1|BAA18962|5462|Colletotrichum	28.47	144	99	3	21	163	24	164	1e-08	52.8
NechaP87571	404|PHI:404|PTH11|AAD30436|318829|Magnaporthe	22.87	341	234	10	61	384	143	471	1e-18	85.1
NechaP97716	716|PHI:716|ZEB1|ABB90284|5518|Fusarium	34.21	573	349	8	84	653	15	562	9e-104	328
NechaP54141	1732|PHI:1732|GzZC047|I1S6B4|5518|Gibberella	45.5	600	318	5	2	594	24	621	2e-166	504
NechaP53897	544|PHI:544|BCMFS1|AAF64435|332648|Botrytis	29.8	557	358	10	4	550	56	589	1e-59	208
NechaP105684	2240|PHI:2240|Srt1|Q4PBY9|5270|Ustilago	27.35	457	318	9	50	501	46	493	1e-39	149
NechaP87585	1424|PHI:1424|GzC2H092|I1S3J7|5518|Gibberella	29.31	481	248	19	51	517	44	446	3e-45	168
NechaP97722	2034|PHI:2034|MFP1|G4MZY1|148305|Magnaporthe	32.58	178	115	3	3	179	315	488	4e-19	85.1
NechaP97722	2034|PHI:2034|MFP1|G4MZY1|148305|Magnaporthe	33.06	124	73	2	61	179	76	194	1e-13	68.2
NechaP87587	1218|PHI:1218|FGSG_01559|I1RAY2|5518|Gibberella	48.39	248	120	2	19	265	78	318	7e-78	240
NechaP87589	3364	31.97	122	70	4	40	161	80	188	1e-07	48.9
NechaP97726	3381	33.19	455	297	5	19	468	188	640	3e-73	244
NechaP54246	1161|PHI:1161|MgMfs1|A4ZGP3|54734|Mycosphaerella	28.44	450	279	10	35	476	84	498	6e-37	142
NechaP53985	1071|PHI:1071|Gas1|CAF05793|5270|Ustilago	23.56	679	408	23	150	771	291	915	2e-30	126
NechaP54313	441|PHI:441|BTP1|CAE55153|40559|Botrytis	27.51	338	217	14	17	340	43	366	7e-25	101
NechaP53922	1959|PHI:1959|GzZC274|I1RM85|5518|Gibberella	28.31	544	341	15	30	562	54	559	3e-49	179
NechaP87604	2968|PHI:2968|Hxs1|J9VQA5|5207|Cryptococcus	24.07	486	336	13	40	508	3	472	5e-30	120
NechaP97732	1051|PHI:1051|CTB3|ABC79591|29003|Cercospora	27.18	412	258	13	3	385	452	850	4e-18	84.3
NechaP97733	441|PHI:441|BTP1|CAE55153|40559|Botrytis	26.39	360	240	11	9	351	22	373	1e-25	103
NechaP54329	1662|PHI:1662|GzCCHC002|I1REJ1|5518|Gibberella	30.14	428	281	6	33	449	626	1046	6e-57	205
NechaP53787	2279|PHI:2279|Conserved	25.45	279	159	9	17	254	13	283	1e-19	83.6
NechaP54161	1555|PHI:1555|GzMyb019|I1RDG6|5518|Gibberella	49.6	506	251	2	57	558	39	544	0	546
NechaP53745	2034|PHI:2034|MFP1|G4MZY1|148305|Magnaporthe	25.66	226	129	8	14	239	302	488	1e-08	53.5
NechaP87616	1420|PHI:1420|GzC2H088|I1S172|5518|Gibberella	24	325	207	11	329	629	330	638	7e-12	66.2
NechaP53917	922|PHI:922|um03615||5270|Ustilago	28.85	617	346	19	8	559	84	672	1e-53	192
NechaP72998	2171|PHI:2171|Peroxisomal	37.7	679	368	19	5	658	30	678	3e-131	405
NechaP8556	1675|PHI:1675|GzDHHC003|Q4I8B6|5518|Gibberella	32	150	89	1	2	138	111	260	1e-10	57.4
NechaP87628	2976|PHI:2976|CgOPT1|C6ZRH8|29905|Colletotrichum	31.46	766	472	15	30	781	7	733	2e-120	383
NechaP87630	1946|PHI:1946|GzZC261|I1RGI7|5518|Gibberella	32.52	532	287	9	4	518	9	485	2e-97	305
NechaP87632	1662|PHI:1662|GzCCHC002|I1REJ1|5518|Gibberella	28.66	478	312	8	57	521	646	1107	1e-60	216
NechaP54115	2038|PHI:2038|Mir1|MGG_02370|148305|Magnaporthe	23.36	244	172	6	4	232	5	248	4e-09	54.3
NechaP54115	2038|PHI:2038|Mir1|MGG_02370|148305|Magnaporthe	24.12	170	113	3	29	189	137	299	1e-07	49.7
NechaP54322	3384	27.17	854	509	34	53	857	195	984	1e-60	221
NechaP54021	419|PHI:419|CSH1|AAP93915|5476|Candida	21.4	299	170	10	26	263	19	313	3e-08	51.2
NechaP97753	2968|PHI:2968|Hxs1|J9VQA5|5207|Cryptococcus	27.08	480	316	12	32	495	2	463	7e-37	140
NechaP53871	1071|PHI:1071|Gas1|CAF05793|5270|Ustilago	23.17	492	315	17	225	680	397	861	3e-22	99.8
NechaP53888	812|PHI:812|MGG_10702|EDJ94108|318829|Magnaporthe	35	320	203	4	9	324	54	372	8e-55	186
NechaP87651	1984|PHI:1984|GzZC299|I1RB67|5518|Gibberella	28.48	474	304	13	107	553	145	610	2e-58	204
NechaP54095	482|PHI:482|LAEA|AAR01218|5085|Aspergillus	29.73	222	153	3	47	267	128	347	5e-34	125
NechaP53769	2968|PHI:2968|Hxs1|J9VQA5|5207|Cryptococcus	26.17	493	347	7	25	508	5	489	5e-47	170
NechaP54124	541|PHI:541|LIP1|AAU87359|332648|Botrytis	34.71	510	268	15	47	516	56	540	3e-69	234
NechaP97768	2322|PHI:2322|SidH|Q4WF54|746128|Aspergillus	33.21	271	155	7	7	268	13	266	4e-36	129
NechaP54080	3417	55.68	1013	398	12	16	1005	21	1005	0	1064
NechaP54199	244|PHI:244|CLAP1|AAN62846|290576|Colletotrichum	28.68	903	498	31	218	994	212	1094	2e-75	268
NechaP97771	511|PHI:511|CaNAG4|EAK93098|5476|Candida	22.53	506	332	20	40	528	119	581	2e-16	79.3
NechaP53993	1775|PHI:1775|GzZC090|I1S5X3|5518|Gibberella	35.64	289	168	7	1	277	94	376	9e-49	167
NechaP54182	465|PHI:465|KIN2|AAB63337|5270|Ustilago	23.11	238	162	4	5	241	2	219	5e-11	62
NechaP54182	465|PHI:465|KIN2|AAB63337|5270|Ustilago	36	100	56	2	337	435	234	326	7e-09	55.5
NechaP9981	1358|PHI:1358|GzC2H018|I1RG87|5518|Gibberella	60	50	20	0	1	50	47	96	1e-17	73.9
NechaP53791	1555|PHI:1555|GzMyb019|I1RDG6|5518|Gibberella	28.6	437	296	11	21	446	72	503	4e-45	164
NechaP53900	3387	25.55	364	208	16	8	352	1706	2025	2e-18	84.3
NechaP97783	2042|PHI:2042|ABC3|Q3Y5V5|148305|Magnaporthe	40.04	562	318	8	732	1278	764	1321	3e-117	397
NechaP97783	2042|PHI:2042|ABC3|Q3Y5V5|148305|Magnaporthe	33.59	643	387	9	26	641	2	631	5e-94	329
NechaP97783	2042|PHI:2042|ABC3|Q3Y5V5|148305|Magnaporthe	31.13	514	334	9	136	641	818	1319	4e-67	246
NechaP97783	2042|PHI:2042|ABC3|Q3Y5V5|148305|Magnaporthe	32.78	421	245	10	888	1277	219	632	1e-50	193
NechaP11912	1741|PHI:1741|GzZC056|I1S780|5518|Gibberella	29.33	624	361	18	1	608	43	602	2e-72	247
NechaP53709	500|PHI:500|YHB1|EAK91807|5476|Candida	32.1	162	95	8	255	407	155	310	6e-08	52.4
NechaP53958	2431|PHI:2431|ACTT2|C9K1M7|5599|Alternaria	30.23	258	147	8	131	384	1	229	9e-28	108
NechaP22507	1392|PHI:1392|GzC2H055|I1RU67|5518|Gibberella	53.17	442	172	8	1	436	159	571	1e-150	442
NechaP54014	1555|PHI:1555|GzMyb019|I1RDG6|5518|Gibberella	29.1	457	315	4	15	469	56	505	9e-66	222
NechaP6315	2315|PHI:2315|ChLae1|G4XKY9|5016|Cochliobolus	29.69	256	167	6	32	281	2	250	2e-21	89.7
NechaP53805	2839|PHI:2839|RED1|Q8NJQ2|5016|Cochliobolus	33.33	297	182	7	7	296	2	289	7e-39	141
NechaP54189	404|PHI:404|PTH11|AAD30436|318829|Magnaporthe	27.21	305	205	8	15	307	102	401	3e-21	92.4
NechaP105693	2038|PHI:2038|Mir1|MGG_02370|148305|Magnaporthe	79.12	297	61	1	27	323	14	309	9e-161	453
NechaP87714	2174|PHI:2174|NMR2|MGG_02860|148305|Magnaporthe	31.84	245	139	7	3	225	6	244	9e-27	105
NechaP54321	3225	79.37	412	85	0	3	414	2	413	0	712
NechaP97803	2336|PHI:2336|NIA1|O00101|13684|Stagonospora	28.25	361	212	12	9	341	542	883	1e-38	145
NechaP97804	2968|PHI:2968|Hxs1|J9VQA5|5207|Cryptococcus	26.64	443	303	9	1	433	36	466	6e-33	127
NechaP87727	1662|PHI:1662|GzCCHC002|I1REJ1|5518|Gibberella	27.05	440	293	11	44	471	652	1075	5e-40	153
NechaP53869	3281	27.04	196	102	8	3	183	4	173	2e-10	58.2
NechaP97808	2639|PHI:2639|Ilv3B|Q4WK65|746128|Aspergillus	63.96	555	185	4	54	606	1	542	0	699
NechaP53796	1835|PHI:1835|GzZC150|I1RIL1|5518|Gibberella	43.23	606	305	8	29	627	53	626	3e-175	514
NechaP87739	2731|PHI:2731|VdSge1|G2XD29|27337|Verticillium	24.11	282	183	10	131	397	152	417	2e-07	50.8
NechaP87743	2099|PHI:2099|Pmc1|MGG_07971|148305|Magnaporthe	43.14	1145	496	25	34	1046	11	1132	0	884
NechaP87744	1912|PHI:1912|GzZC227|I1RHF1|5518|Gibberella	73.84	646	150	8	1	640	1	633	0	944
NechaP87745	716|PHI:716|ZEB1|ABB90284|5518|Fusarium	28.78	490	281	16	62	527	116	561	2e-36	144
NechaP87746	1046|PHI:1046|CTB5|ABK64182|29003|Cercospora	25.7	467	288	16	52	483	14	456	9e-23	98.2
NechaP6107	256|PHI:256|GAS1|AAK52794|318829|Magnaporthe	33	200	120	7	1	193	6	198	8e-23	93.6
NechaP54043	2968|PHI:2968|Hxs1|J9VQA5|5207|Cryptococcus	25.32	462	317	10	1	449	54	500	6e-46	166
NechaP54017	2376|PHI:2376|DEP2|D2E9W7|29001|Alternaria	31.47	448	273	13	4	433	6	437	3e-51	180
NechaP54176	2147|PHI:2147|Erl1|G5EH97|148305|Magnaporthe	35.22	230	139	5	10	238	22	242	2e-38	140
NechaP54135	2147|PHI:2147|Erl1|G5EH97|148305|Magnaporthe	39.08	238	130	7	8	242	21	246	2e-49	172
NechaP26993	441|PHI:441|BTP1|CAE55153|40559|Botrytis	24.57	293	178	9	29	294	48	324	8e-15	71.6
NechaP53867	874|PHI:874|MGG_00435|EDK02952|318829|Magnaporthe	27.18	195	119	4	66	241	116	306	1e-12	65.5
NechaP87767	2032|PHI:2032|VTL1|G4NGA7|148305|Magnaporthe	27.19	526	340	15	35	540	24	526	4e-54	191
NechaP54291	2279|PHI:2279|Conserved	25.44	283	174	10	5	257	6	281	5e-18	78.6
NechaP54249	1910|PHI:1910|GzZC225|I1RHG2|5518|Gibberella	72.29	747	174	13	2	727	3	737	0	1069
NechaP53916	2103|PHI:2103|Vacuolar	43.98	191	105	2	51	239	95	285	6e-37	143
NechaP53916	2103|PHI:2103|Vacuolar	43.59	156	82	2	386	540	588	738	2e-36	141
NechaP87786	2817|PHI:2817|Aapg1|Q9C4A0|5599|Alternaria	67.34	349	110	3	28	374	32	378	5e-155	443
NechaP53746	2020|PHI:2020|Tup1|XP_759427|5270|Ustilago	25.48	263	172	7	64	305	466	725	1e-16	78.6
NechaP53746	2020|PHI:2020|Tup1|XP_759427|5270|Ustilago	26.02	196	126	6	153	334	422	612	1e-09	57
NechaP87791	1555|PHI:1555|GzMyb019|I1RDG6|5518|Gibberella	26.92	509	318	16	36	507	53	544	3e-45	165
NechaP53879	2393|PHI:2393|Related	26.93	479	290	11	10	474	9	441	2e-50	178
NechaP87797	106|PHI:106|CAT1|AAC39448|5476|Candida	49.23	390	190	6	4	390	3	387	9e-127	379
NechaP97832	922|PHI:922|um03615||5270|Ustilago	29.9	612	376	20	10	582	84	681	1e-53	193
NechaP53975	1270|PHI:1270|FGSG_06420|I1RHA1|5518|Gibberella	40.61	293	160	5	87	379	1	279	2e-68	221
NechaP53726	2315|PHI:2315|ChLae1|G4XKY9|5016|Cochliobolus	35.97	278	158	6	15	272	2	279	9e-46	155
NechaP54093	922|PHI:922|um03615||5270|Ustilago	27.18	607	332	20	14	529	84	671	3e-48	176
NechaP87808	2863|PHI:2863|Lys144|Q5A7T6|5476|Candida	39.62	53	31	1	33	85	33	84	1e-08	54.7
NechaP87809	922|PHI:922|um03615||5270|Ustilago	28.95	608	341	20	3	528	75	673	5e-47	172
NechaP87817	1555|PHI:1555|GzMyb019|I1RDG6|5518|Gibberella	22.59	518	316	15	26	499	69	545	7e-32	125
NechaP53855	1956|PHI:1956|GzZC271|I1RLT2|5518|Gibberella	26.05	476	278	13	24	440	121	581	4e-38	146
NechaP54162	438|PHI:438|BcBOT1	25.83	453	278	15	24	446	44	468	4e-33	128
NechaP97845	1986|PHI:1986|GzZC301|I1RA77|5518|Gibberella	25.6	500	292	15	250	685	29	512	7e-28	117
NechaP54076	1662|PHI:1662|GzCCHC002|I1REJ1|5518|Gibberella	20.19	416	290	13	10	411	607	994	1e-13	71.2
NechaP106547	115|PHI:115|PGX1|AAC26146|5017|Cochliobolus	31.55	412	232	12	14	394	47	439	4e-44	159
NechaP97849	1555|PHI:1555|GzMyb019|I1RDG6|5518|Gibberella	23.77	446	317	7	18	444	74	515	6e-36	137
NechaP73052	538|PHI:538|FRT1|AAU87358|40559|Botrytis	63.73	557	192	7	7	558	28	579	0	682
NechaP28732	1260|PHI:1260|FGSG_13944|I1RUC7|5518|Gibberella	43.14	153	87	0	26	178	452	604	9e-27	104
NechaP28732	1260|PHI:1260|FGSG_13944|I1RUC7|5518|Gibberella	37.08	178	112	0	1	178	460	637	8e-22	90.5
NechaP28732	1260|PHI:1260|FGSG_13944|I1RUC7|5518|Gibberella	35.22	159	103	0	1	159	493	651	3e-19	83.2
NechaP28732	1260|PHI:1260|FGSG_13944|I1RUC7|5518|Gibberella	47.62	63	32	1	116	178	444	505	5e-09	52
NechaP53989	1260|PHI:1260|FGSG_13944|I1RUC7|5518|Gibberella	44.81	212	117	0	1	212	115	326	5e-62	204
NechaP54281	2968|PHI:2968|Hxs1|J9VQA5|5207|Cryptococcus	21.95	483	352	10	42	509	18	490	3e-18	85.1
NechaP87850	1820|PHI:1820|GzZC135|I1S8F7|5518|Gibberella	78.46	246	50	2	309	553	1	244	3e-141	412
NechaP87859	2490|PHI:2490|MCA|E9B636|5665|Leishmania	29.68	155	95	4	50	204	64	204	2e-10	60.5
NechaP27279	2032|PHI:2032|VTL1|G4NGA7|148305|Magnaporthe	25.44	114	77	1	43	148	109	222	5e-07	48.1
NechaP54226	504|PHI:504|LEU2|CAA42366|4932|Saccharomyces	31.52	368	222	15	7	358	6	359	4e-38	139
NechaP87866	3457	22.82	504	304	14	57	490	42	530	3e-17	82
NechaP54190	784|PHI:784|MGG_00056|EDK03390|318829|Magnaporthe	29.71	276	159	9	2	259	11	269	1e-16	75.1
NechaP87876	2968|PHI:2968|Hxs1|J9VQA5|5207|Cryptococcus	24.14	493	343	12	48	530	7	478	3e-34	133
NechaP54279	1662|PHI:1662|GzCCHC002|I1REJ1|5518|Gibberella	25.11	438	308	10	57	489	653	1075	4e-31	125
NechaP87881	2654|PHI:2654|DUR1,2|Q59VF3|5476|Candida	25.11	446	275	19	122	542	6	417	5e-17	82.8
NechaP102906	386|PHI:386|TSA1|AAP68994|5207|Cryptococcus	60.94	192	72	2	6	197	9	197	3e-85	252
NechaP53874	2315|PHI:2315|ChLae1|G4XKY9|5016|Cochliobolus	33.68	291	181	8	73	355	3	289	9e-50	169
NechaP87890	2802|PHI:2802|3hnr|B2ZRQ4|93612|Setosphaeria	36.05	258	146	5	2	243	9	263	1e-48	161
NechaP87892	3017	40.19	530	234	11	190	637	298	826	1e-114	363
NechaP87892	3017	30.2	149	95	5	1	143	1	146	1e-08	55.5
NechaP97873	2022|PHI:2022|BUF1|MGG_02252|148305|Magnaporthe	25.76	198	134	3	9	206	31	215	5e-14	67
NechaP54179	2476|PHI:2476|CcpelA|G8AA67|27358|Colletotrichum	62.71	295	106	3	27	318	32	325	3e-120	350
NechaP97875	2376|PHI:2376|DEP2|D2E9W7|29001|Alternaria	33.07	387	237	11	4	378	6	382	6e-51	179
NechaP87897	1923|PHI:1923|GzZC238|I1RHB3|5518|Gibberella	70.16	697	190	7	1	687	1	689	0	1021
NechaP54330	1662|PHI:1662|GzCCHC002|I1REJ1|5518|Gibberella	24.89	474	314	16	21	480	628	1073	1e-34	137
NechaP26975	441|PHI:441|BTP1|CAE55153|40559|Botrytis	24.35	271	168	8	14	265	37	289	2e-10	58.2
NechaP87909	438|PHI:438|BcBOT1	31.4	484	315	6	4	479	9	483	2e-75	247
NechaP54105	438|PHI:438|BcBOT1	27.25	499	339	12	22	510	21	505	3e-55	193
NechaP97884	44|PHI:44|TRI5|AAM90953|5518|Fusarium	40.17	361	211	2	1	359	1	358	3e-105	317
NechaP54125	3380	33.87	626	345	16	8	597	12	604	6e-99	317
NechaP53983	144|PHI:144|CHT42|AAC05829|29875|Trichoderma	29.26	229	123	8	113	318	32	244	5e-20	90.1
NechaP86235	2968|PHI:2968|Hxs1|J9VQA5|5207|Cryptococcus	24.84	459	319	12	78	523	61	506	2e-30	121
NechaP51570	144|PHI:144|CHT42|AAC05829|29875|Trichoderma	24.47	425	259	15	150	532	21	425	1e-21	94.7
NechaP51366	1503|PHI:1503|GzHMG035|I1S828|5518|Gibberella	28.27	237	145	6	257	474	264	494	1e-22	99
NechaP97074	441|PHI:441|BTP1|CAE55153|40559|Botrytis	22.93	266	193	6	85	344	115	374	2e-08	52.8
NechaP86247	1161|PHI:1161|MgMfs1|A4ZGP3|54734|Mycosphaerella	25.92	382	259	8	104	469	138	511	9e-23	100
NechaP97083	504|PHI:504|LEU2|CAA42366|4932|Saccharomyces	48.39	372	176	6	7	376	6	363	5e-113	335
NechaP51460	784|PHI:784|MGG_00056|EDK03390|318829|Magnaporthe	28.4	257	150	7	5	228	14	269	5e-19	80.9
NechaP51371	538|PHI:538|FRT1|AAU87358|40559|Botrytis	24.49	490	320	15	3	479	96	548	9e-22	96.3
NechaP86260	1377|PHI:1377|GzC2H040|I1RQ34|5518|Gibberella	25.43	232	160	4	350	569	510	740	3e-11	63.9
NechaP101978	1910|PHI:1910|GzZC225|I1RHG2|5518|Gibberella	27.47	597	339	21	33	568	107	670	1e-44	166
NechaP51365	1555|PHI:1555|GzMyb019|I1RDG6|5518|Gibberella	23.12	480	337	12	9	465	73	543	2e-33	129
NechaP12293	2654|PHI:2654|DUR1,2|Q59VF3|5476|Candida	26.12	467	252	19	72	535	69	445	2e-17	83.2
NechaP97092	2256|PHI:2256|Xdh1|Q0UA24|13684|Phaeosphaeria	28.88	329	197	13	16	312	28	351	5e-23	95.1
NechaP86270	2174|PHI:2174|NMR2|MGG_02860|148305|Magnaporthe	20.44	274	185	7	11	274	5	255	1e-07	49.7
NechaP72643	1806|PHI:1806|GzZC121|I1RUM8|5518|Gibberella	33.06	121	72	4	12	124	10	129	7e-13	68.9
NechaP86274	2432|PHI:2432|FgRgsA|I1RKA4|5518|Gibberella	36.99	173	89	5	2	166	61	221	1e-25	101
NechaP97095	2279|PHI:2279|Conserved	29.93	294	169	11	12	286	1	276	2e-26	103
NechaP51514	1401|PHI:1401|GzC2H064|I1RVY6|5518|Gibberella	36.15	603	296	10	7	584	294	832	2e-108	346
NechaP86278	2968|PHI:2968|Hxs1|J9VQA5|5207|Cryptococcus	27.25	499	331	13	24	510	21	499	4e-44	162
NechaP97097	2256|PHI:2256|Xdh1|Q0UA24|13684|Phaeosphaeria	26.1	364	238	10	1	351	12	357	4e-27	107
NechaP51493	881|PHI:881|MGG_04556|EDJ96020|318829|Magnaporthe	35.2	196	127	0	2	197	8	203	9e-36	132
NechaP86282	881|PHI:881|MGG_04556|EDJ96020|318829|Magnaporthe	35.53	228	137	4	5	232	2	219	7e-37	135
NechaP86287	2256|PHI:2256|Xdh1|Q0UA24|13684|Phaeosphaeria	25.58	344	228	9	5	335	16	344	8e-23	95.1
NechaP12626	1401|PHI:1401|GzC2H064|I1RVY6|5518|Gibberella	35.27	567	288	11	3	545	323	834	1e-92	302
NechaP51477	881|PHI:881|MGG_04556|EDJ96020|318829|Magnaporthe	28.37	349	220	9	1	348	1	320	1e-36	135
NechaP86290	2968|PHI:2968|Hxs1|J9VQA5|5207|Cryptococcus	23.9	523	369	13	1	515	1	502	1e-31	124
NechaP86296	2240|PHI:2240|Srt1|Q4PBY9|5270|Ustilago	23.86	503	374	5	28	526	3	500	5e-34	132
NechaP24175	167|PHI:167|CHIP3|AAF00024|5457|Colletotrichum	27.91	498	291	13	14	461	82	561	5e-38	143
NechaP86298	552|PHI:552|BcLCC2|AAK77953|40559|Botrytis	41.28	596	288	14	69	653	37	581	3e-139	421
NechaP51474	3364	31.73	104	65	3	32	135	82	179	5e-08	50.4
NechaP72647	2171|PHI:2171|Peroxisomal	35.54	664	380	16	6	648	32	668	1e-120	377
NechaP51315	1706|PHI:1706|GzZC021|I1RJ68|5518|Gibberella	54.62	584	230	7	9	587	21	574	0	621
NechaP51628	1555|PHI:1555|GzMyb019|I1RDG6|5518|Gibberella	25.21	484	336	8	4	466	36	514	3e-42	156
NechaP97110	538|PHI:538|FRT1|AAU87358|40559|Botrytis	21.53	548	305	17	9	437	8	549	3e-19	88.2
NechaP51597	267|PHI:267|MLT1|AAD51594|5476|Candida	32.99	591	352	10	556	1124	1033	1601	2e-90	318
NechaP51597	267|PHI:267|MLT1|AAD51594|5476|Candida	28.68	509	323	8	16	487	396	901	1e-52	199
NechaP51597	267|PHI:267|MLT1|AAD51594|5476|Candida	27.54	236	152	8	900	1128	686	909	3e-15	78.2
NechaP51597	267|PHI:267|MLT1|AAD51594|5476|Candida	24.92	317	189	10	198	475	1278	1584	2e-09	59.3
NechaP86308	901|PHI:901|um01886||5270|Ustilago	30.69	391	242	10	38	418	140	511	7e-45	164
NechaP51620	901|PHI:901|um01886||5270|Ustilago	26.47	374	244	14	29	388	150	506	2e-36	137
NechaP86310	1946|PHI:1946|GzZC261|I1RGI7|5518|Gibberella	42.86	56	32	0	4	59	9	64	6e-10	59.3
NechaP51498	2357|PHI:2357|CYP52X1|E2EAF6|475271|Beauveria	29.5	261	150	13	201	440	237	484	2e-12	66.2
NechaP86318	901|PHI:901|um01886||5270|Ustilago	29.93	461	279	13	32	467	144	585	1e-57	201
NechaP86321	1555|PHI:1555|GzMyb019|I1RDG6|5518|Gibberella	21.46	480	345	13	52	511	73	540	4e-18	84.7
NechaP86322	1193|PHI:1193|(Sc	26.54	471	249	14	69	455	20	477	2e-43	159
NechaP86324	26|PHI:26|CaMDR1|CAA37820|5476|Candida	21.11	398	273	8	2	390	106	471	1e-11	64.3
NechaP86331	922|PHI:922|um03615||5270|Ustilago	34.02	629	328	23	17	599	84	671	7e-87	285
NechaP97122	413|PHI:413|MPD1|AAT84078|13684|Stagonospora	23.69	401	240	15	6	369	15	386	2e-21	93.2
NechaP51406	2994|PHI:2994|MGG_06355.6|G4N7V2|148305|Magnaporthe	23.53	204	141	6	6	203	450	644	5e-09	54.7
NechaP51515	1675|PHI:1675|GzDHHC003|Q4I8B6|5518|Gibberella	34.18	158	93	4	2	155	81	231	2e-08	49.7
NechaP86341	1841|PHI:1841|GzZC156|I1RIY6|5518|Gibberella	29.98	637	396	18	21	630	10	623	2e-74	253
NechaP51327	1818|PHI:1818|GzZC133|I1S7V2|5518|Gibberella	68.6	242	74	1	61	302	28	267	2e-119	357
NechaP51531	143|PHI:143|CHT|AAA33353|5563|Gloeocercospora	37.9	314	189	4	1	311	1	311	8e-70	223
NechaP51619	3225	50.13	397	196	2	44	438	17	413	1e-158	456
NechaP86350	1887|PHI:1887|GzZC202|I1RHZ6|5518|Gibberella	32.96	358	217	7	82	422	164	515	2e-51	187
NechaP106448	1575|PHI:1575|GzOB015|I1RIQ3|5518|Gibberella	73.97	219	57	0	2	220	23	241	3e-119	341
NechaP72652	3038	79.8	495	100	0	20	514	28	522	0	836
NechaP51300	812|PHI:812|MGG_10702|EDJ94108|318829|Magnaporthe	36.75	332	181	7	5	313	46	371	4e-58	194
NechaP51584	1159|PHI:1159|MgAtr7|A5H456|54734|Mycosphaerella	51.8	278	133	1	42	318	19	296	4e-86	292
NechaP86363	236|PHI:236|WdCHS2|AAC34496|5970|Wangiella	30.86	162	92	6	309	460	198	349	3e-09	57
NechaP23495	243|PHI:243|CHIP6|AAD00894|5457|Colletotrichum	35.32	436	250	8	12	420	92	522	3e-75	251
NechaP86368	1662|PHI:1662|GzCCHC002|I1REJ1|5518|Gibberella	30.62	503	324	12	19	511	620	1107	1e-58	210
NechaP51418	3457	24.6	439	223	15	40	371	45	482	8e-16	77
NechaP51410	3663	26.2	374	242	7	32	383	19	380	2e-22	97.1
NechaP101990	2315|PHI:2315|ChLae1|G4XKY9|5016|Cochliobolus	40.21	291	168	6	44	329	2	291	1e-60	196
NechaP86392	697|PHI:697|ugt51E1|AAM81358|5022|Leptosphaeria	28.45	355	211	14	80	425	75	395	1e-26	107
NechaP86394	491|PHI:491|YVH1|EAK96144|5476|Candida	49.12	57	29	0	484	540	92	148	1e-10	60.5
NechaP51328	191|PHI:191|TOM1|AAB08446|39703|Septoria	42.15	790	358	20	27	744	32	794	0	558
NechaP51378	4194	25.11	231	121	8	337	555	294	484	5e-10	59.3
NechaP51314	1885|PHI:1885|GzZC200|I1RJ54|5518|Gibberella	65.07	544	170	6	1	542	28	553	0	682
NechaP51435	1662|PHI:1662|GzCCHC002|I1REJ1|5518|Gibberella	35.73	473	290	6	2	468	611	1075	2e-92	307
NechaP122895	2978|PHI:2978|MoCel12A|G4N5V2|148305|Magnaporthe	30.35	201	118	10	63	259	66	248	7e-11	58.9
NechaP86402	1260|PHI:1260|FGSG_13944|I1RUC7|5518|Gibberella	28.5	214	126	7	69	280	409	597	4e-08	53.5
NechaP26898	2597|PHI:2597|Pir32|Q59PW0	29.51	122	77	2	42	154	99	220	9e-09	53.1
NechaP97150	2315|PHI:2315|ChLae1|G4XKY9|5016|Cochliobolus	33.11	296	185	7	47	335	2	291	4e-52	174
NechaP97152	2315|PHI:2315|ChLae1|G4XKY9|5016|Cochliobolus	32.99	291	185	7	70	353	3	290	5e-49	167
NechaP86415	1183|PHI:1183|(Sc	28.77	212	130	9	338	546	28	221	1e-09	57.8
NechaP51427	4194	25.51	490	308	13	76	530	13	480	6e-39	147
NechaP51372	508|PHI:508|AFT1|BAB69076|5599|Alternaria	33.07	514	293	17	76	569	89	571	3e-65	223
NechaP51569	716|PHI:716|ZEB1|ABB90284|5518|Fusarium	30.11	176	113	5	70	236	117	291	6e-16	77.8
NechaP97163	1555|PHI:1555|GzMyb019|I1RDG6|5518|Gibberella	25.55	321	218	7	22	331	73	383	1e-23	101
NechaP51733	2269|PHI:2269|Mdh1|0|13684|Phaeosphaeria	37.36	265	149	6	53	314	15	265	1e-49	166
NechaP97165	2334|PHI:2334|BcNma|E2GL14|40559|Botrytis	53.67	954	424	11	30	968	51	1001	0	1009
NechaP97166	2247|PHI:2247|Sch1|EAT82552|13684|Phaeosphaeria	36.71	286	164	8	8	290	6	277	5e-43	149
NechaP105600	1795|PHI:1795|GzZC110|I1RSX8|5518|Gibberella	24.55	440	273	9	15	413	14	435	1e-28	117
NechaP14180	1707|PHI:1707|GzZC022|I1RJY6|5518|Gibberella	32.43	518	279	12	1	468	121	617	1e-76	255
NechaP86442	1048|PHI:1048|CTB7|ABK64184|29003|Cercospora	32.35	405	217	14	2	364	4	393	1e-44	160
NechaP51970	2549|PHI:2549|MAK5|Q4WMS3|746128|Aspergillus	31.05	409	215	13	93	444	219	617	3e-41	156
NechaP51853	364|PHI:364|MIT1|EAK95175|5476|Candida	39.93	268	140	8	58	319	16	268	2e-51	179
NechaP86448	1781|PHI:1781|GzZC096|I1S389|5518|Gibberella	20.09	702	419	28	9	610	44	703	3e-09	57.4
NechaP51851	3257	31.58	285	179	8	39	310	147	428	9e-28	111
NechaP51674	2746|PHI:2746|treZ|Q02LV7|287|Pseudomonas	28.03	157	95	5	59	214	121	260	1e-09	57.4
NechaP51736	441|PHI:441|BTP1|CAE55153|40559|Botrytis	27.88	269	166	7	128	387	128	377	1e-23	98.6
NechaP51832	1046|PHI:1046|CTB5|ABK64182|29003|Cercospora	27.81	471	308	10	47	499	1	457	3e-51	181
NechaP86456	2329|PHI:2329|CTB4|A0ST42|29003|Cercospora	30	480	316	12	18	488	38	506	6e-60	205
NechaP51818	1161|PHI:1161|MgMfs1|A4ZGP3|54734|Mycosphaerella	24.12	369	246	14	9	358	50	403	2e-12	66.6
NechaP51752	1442|PHI:1442|GzDNL|I1RG27|5518|Gibberella	36.83	543	300	8	7	516	19	551	3e-111	342
NechaP51879	1555|PHI:1555|GzMyb019|I1RDG6|5518|Gibberella	23.16	285	195	7	115	382	235	512	7e-16	76.6
NechaP97183	1662|PHI:1662|GzCCHC002|I1REJ1|5518|Gibberella	31.16	475	294	11	17	473	653	1112	2e-68	238
NechaP105602	2928|PHI:2928|lip22|J9NNZ8|59765|Fusarium	70.69	447	104	5	4	424	3	448	0	610
NechaP97186	55|PHI:55|PKS1|AAB08104|5016|Cochliobolus	27.48	222	134	8	27	233	1845	2054	5e-10	58.2
NechaP51686	1908|PHI:1908|GzZC223|I1RHH3|5518|Gibberella	48.1	420	201	5	4	421	3	407	2e-132	396
NechaP51665	3629	28.22	326	182	10	4	292	16	326	1e-20	91.3
NechaP51828	4194	26.02	492	312	18	18	480	8	476	3e-37	141
NechaP51795	2595|PHI:2595|Tc52|D3JLB9|5693|Trypanosoma	28.66	157	95	7	20	170	1	146	7e-09	52.8
NechaP51926	901|PHI:901|um01886||5270|Ustilago	23.37	492	294	14	67	537	160	589	6e-30	122
NechaP86474	1812|PHI:1812|GzZC127|I1RV71|5518|Gibberella	24.41	463	286	15	27	462	19	444	2e-24	104
NechaP97193	1161|PHI:1161|MgMfs1|A4ZGP3|54734|Mycosphaerella	48.15	513	256	5	10	517	75	582	2e-170	496
NechaP51668	2315|PHI:2315|ChLae1|G4XKY9|5016|Cochliobolus	36.77	291	177	5	59	342	1	291	8e-61	197
NechaP51742	2025|PHI:2025|HDL1|G4MQZ9|148305|Magnaporthe	28.08	146	86	4	81	208	200	344	8e-07	48.5
NechaP86480	1981|PHI:1981|GzZC296|I1RIY9|5518|Gibberella	54.15	626	280	5	8	631	4	624	0	700
NechaP72678	2315|PHI:2315|ChLae1|G4XKY9|5016|Cochliobolus	31.29	278	182	6	5	276	18	292	3e-47	160
NechaP72681	2315|PHI:2315|ChLae1|G4XKY9|5016|Cochliobolus	38.49	291	175	4	51	337	2	292	1e-61	199
NechaP97198	438|PHI:438|BcBOT1	29.4	483	316	9	1	471	17	486	1e-61	210
NechaP64414	3236	26.97	445	254	19	16	415	85	503	9e-26	107
NechaP86494	2034|PHI:2034|MFP1|G4MZY1|148305|Magnaporthe	28.49	172	113	5	10	174	315	483	3e-09	55.1
NechaP51976	1662|PHI:1662|GzCCHC002|I1REJ1|5518|Gibberella	22.17	433	309	12	62	484	653	1067	3e-24	104
NechaP86497	1260|PHI:1260|FGSG_13944|I1RUC7|5518|Gibberella	32.67	404	215	17	8	391	9	375	1e-43	166
NechaP51688	1905|PHI:1905|GzZC220|I1RHN3|5518|Gibberella	37.66	547	325	6	2	545	7	540	6e-120	369
NechaP86502	2968|PHI:2968|Hxs1|J9VQA5|5207|Cryptococcus	26.68	431	283	13	107	516	45	463	8e-25	105
NechaP51952	1795|PHI:1795|GzZC110|I1RSX8|5518|Gibberella	24.25	268	142	9	19	263	14	243	9e-09	53.9
NechaP97205	438|PHI:438|BcBOT1	24.38	160	95	4	239	373	317	475	7e-08	51.6
NechaP4350	404|PHI:404|PTH11|AAD30436|318829|Magnaporthe	27.46	335	212	5	8	328	63	380	8e-34	129
NechaP86519	2376|PHI:2376|DEP2|D2E9W7|29001|Alternaria	22.53	364	241	9	3	338	6	356	2e-14	71.6
NechaP51709	1456|PHI:1456|GzAra004|I1RN15|5518|Gibberella	28.89	180	122	2	35	213	285	459	2e-20	88.2
NechaP51935	1456|PHI:1456|GzAra004|I1RN15|5518|Gibberella	35.12	168	83	5	2	148	557	719	6e-22	90.9
NechaP86523	1275|PHI:1275|FGSG_03146|I1S7R2|5518|Gibberella	30.08	123	70	4	244	364	376	484	6e-10	57.8
NechaP9036	449|PHI:449|CDC42|CAI48090|5111|Claviceps	38.61	158	84	4	1	148	6	160	2e-28	103
NechaP72692	2835|PHI:2835|RED2|C3JXE8|5016|Cochliobolus	24.4	168	122	3	628	795	84	246	6e-07	49.3
NechaP51778	2020|PHI:2020|Tup1|XP_759427|5270|Ustilago	24.44	266	173	4	743	983	466	728	2e-23	103
NechaP51778	2020|PHI:2020|Tup1|XP_759427|5270|Ustilago	23.67	338	227	8	707	1014	382	718	3e-22	100
NechaP51679	1719|PHI:1719|GzZC034|I1S9U4|5518|Gibberella	38.46	572	301	11	5	537	6	565	2e-129	393
NechaP51884	2329|PHI:2329|CTB4|A0ST42|29003|Cercospora	40.89	247	144	1	1	247	266	510	4e-61	201
NechaP97218	2175|PHI:2175|NMR3|MGG_09705|148305|Magnaporthe	32.59	316	194	7	4	305	8	318	5e-47	160
NechaP86536	541|PHI:541|LIP1|AAU87359|332648|Botrytis	33.91	466	243	15	31	450	43	489	8e-61	211
NechaP51867	2269|PHI:2269|Mdh1|0|13684|Phaeosphaeria	31.66	259	157	8	27	275	14	262	1e-25	100
NechaP51747	112|PHI:112|MAK1|AAC49410|140110|Nectria	26.74	430	270	14	12	431	9	403	5e-25	103
NechaP86540	2981|PHI:2981|Ctf1|A6N6J8|59765|Fusarium	32.53	455	261	9	254	702	222	636	3e-64	230
NechaP51696	2022|PHI:2022|BUF1|MGG_02252|148305|Magnaporthe	27.13	188	101	7	10	175	92	265	3e-10	56.2
NechaP51888	511|PHI:511|CaNAG4|EAK93098|5476|Candida	20.31	512	354	12	41	537	107	579	7e-12	65.5
NechaP105607	2968|PHI:2968|Hxs1|J9VQA5|5207|Cryptococcus	24.63	471	315	14	59	515	24	468	1e-32	128
NechaP51843	1341|PHI:1341|GzC2H001|I1R9T1|5518|Gibberella	39.8	98	58	1	100	196	9	106	2e-18	76.6
NechaP51812	2038|PHI:2038|Mir1|MGG_02370|148305|Magnaporthe	24.9	261	157	7	25	278	23	251	2e-08	52.4
NechaP106457	115|PHI:115|PGX1|AAC26146|5017|Cochliobolus	36.78	367	206	6	62	416	66	418	1e-71	235
NechaP64426	2315|PHI:2315|ChLae1|G4XKY9|5016|Cochliobolus	34.24	295	182	6	11	298	2	291	8e-50	167
NechaP97233	1028|PHI:1028|bcpme1|CAC29255|40559|Botrytis	38.1	294	161	11	1366	1655	31	307	3e-39	150
NechaP97233	1028|PHI:1028|bcpme1|CAC29255|40559|Botrytis	33.57	280	174	7	1054	1328	70	342	2e-32	130
NechaP97233	1028|PHI:1028|bcpme1|CAC29255|40559|Botrytis	33.23	325	201	12	1716	2031	29	346	3e-30	124
NechaP97233	1028|PHI:1028|bcpme1|CAC29255|40559|Botrytis	30.84	321	200	10	669	976	31	342	2e-22	99.8
NechaP97234	1458|PHI:1458|GzAra006|Q4I7F9|5518|Gibberella	21.93	424	258	13	32	399	263	669	7e-17	82
NechaP102013	1055|PHI:1055|CgCHSIII|AAL23718|31870|Colletotrichum	71.9	886	234	10	93	970	34	912	0	1295
NechaP72708	3225	57.04	405	166	5	8	410	6	404	3e-176	500
NechaP51916	1887|PHI:1887|GzZC202|I1RHZ6|5518|Gibberella	79.72	710	90	7	22	719	30	697	0	1135
NechaP51729	2839|PHI:2839|RED1|Q8NJQ2|5016|Cochliobolus	27.39	241	138	8	121	340	124	348	8e-13	65.9
NechaP51835	1514|PHI:1514|GzHOME012|I1RYV5|5518|Gibberella	47.03	572	242	10	110	629	439	1001	2e-165	506
NechaP51835	1514|PHI:1514|GzHOME012|I1RYV5|5518|Gibberella	52.21	136	63	2	1	135	185	319	2e-38	149
NechaP97245	812|PHI:812|MGG_10702|EDJ94108|318829|Magnaporthe	29.64	361	236	8	1	355	23	371	2e-41	150
NechaP51829	3028	26.01	446	252	14	85	527	44	414	8e-32	124
NechaP86575	1209|PHI:1209|FGSG_04770|I1RLH1|5518|Gibberella	41.07	112	55	4	286	396	212	313	4e-12	67
NechaP51927	2315|PHI:2315|ChLae1|G4XKY9|5016|Cochliobolus	22.82	206	147	7	9	207	15	215	5e-08	50.4
NechaP86579	191|PHI:191|TOM1|AAB08446|39703|Septoria	29.52	454	237	12	13	402	54	488	7e-44	168
NechaP86579	191|PHI:191|TOM1|AAB08446|39703|Septoria	29.94	314	187	9	546	830	493	802	3e-29	122
NechaP97249	441|PHI:441|BTP1|CAE55153|40559|Botrytis	25.99	277	186	7	109	382	119	379	3e-21	91.7
NechaP97250	2844|PHI:2844|BRM2|O93802|5599|Alternaria	28.25	269	173	9	3	262	6	263	7e-17	75.5
NechaP86582	2209|PHI:2209|endo-1,4-beta-xylanase	47.32	298	145	3	61	353	59	349	2e-98	298
NechaP105613	2315|PHI:2315|ChLae1|G4XKY9|5016|Cochliobolus	33.33	288	185	6	32	312	4	291	4e-44	152
NechaP86586	3257	32.58	264	158	8	59	316	148	397	3e-20	89.4
NechaP51924	184|PHI:184|RBT4|AAG09789|5476|Candida	33.81	139	79	4	104	240	216	343	1e-12	63.9
NechaP86591	3301	45.28	265	126	8	4	263	3	253	2e-64	203
NechaP86595	296|PHI:296|CZK3|AAP72037|135779|Cercospora	26.17	214	108	9	192	388	1131	1311	7e-09	57
NechaP51706	1260|PHI:1260|FGSG_13944|I1RUC7|5518|Gibberella	35.9	195	105	6	1	176	128	321	4e-27	106
NechaP51776	1821|PHI:1821|GzZC136|I1RWY8|5518|Gibberella	68.8	407	86	4	102	494	54	433	0	556
NechaP97262	663|PHI:663|spvB|AAL23530|90371|Salmonella	33.65	315	187	6	111	413	33	337	3e-43	167
NechaP106465	1028|PHI:1028|bcpme1|CAC29255|40559|Botrytis	48	325	158	6	13	329	25	346	6e-91	276
NechaP13140	1724|PHI:1724|GzZC039|I1SAE9|5518|Gibberella	32.2	413	264	3	90	494	194	598	2e-74	248
NechaP13140	1724|PHI:1724|GzZC039|I1SAE9|5518|Gibberella	56.76	37	16	0	3	39	18	54	2e-08	53.5
NechaP52155	1662|PHI:1662|GzCCHC002|I1REJ1|5518|Gibberella	24.6	496	338	13	7	485	597	1073	2e-28	117
NechaP52025	2654|PHI:2654|DUR1,2|Q59VF3|5476|Candida	25.59	426	268	16	29	419	28	439	7e-17	80.9
NechaP97267	784|PHI:784|MGG_00056|EDK03390|318829|Magnaporthe	29.37	269	164	10	10	264	13	269	7e-19	81.3
NechaP52098	2570|PHI:2570|CYB2|Q6FM61|5478|Candida	54.51	488	210	6	6	481	93	580	0	536
NechaP52137	2117|PHI:2117|SPM1|P58371|148305|Magnaporthe	36.18	445	222	18	20	422	28	452	4e-57	196
NechaP86624	1266|PHI:1266|FGSG_12149|I1RH87|5518|Gibberella	78.66	328	53	1	1	311	1	328	0	540
NechaP52060	2034|PHI:2034|MFP1|G4MZY1|148305|Magnaporthe	32.14	140	93	1	38	177	50	187	7e-13	65.9
NechaP52060	2034|PHI:2034|MFP1|G4MZY1|148305|Magnaporthe	27.33	172	121	2	12	182	318	486	5e-12	63.5
NechaP86629	1047|PHI:1047|CTB6|ABK64183|29003|Cercospora	29.13	206	101	8	12	183	3	197	7e-12	62.8
NechaP97276	2558|PHI:2558|DUR31|Q59P00|5476|Candida	29.55	132	87	3	114	240	89	219	8e-08	52.4
NechaP52172	1277|PHI:1277|FGSG_12887|I1S5L1|5518|Gibberella	38.99	831	414	21	1	762	1	807	4e-171	516
NechaP86637	2731|PHI:2731|VdSge1|G2XD29|27337|Verticillium	23.91	322	210	9	3	295	2	317	2e-09	57.4
NechaP52063	1047|PHI:1047|CTB6|ABK64183|29003|Cercospora	25.25	297	173	8	13	282	5	279	2e-13	67.8
NechaP86641	1816|PHI:1816|GzZC131|I1RRS3|5518|Gibberella	37.41	409	241	5	174	568	302	709	2e-78	266
NechaP86641	1816|PHI:1816|GzZC131|I1RRS3|5518|Gibberella	49.28	69	33	1	18	86	57	123	8e-14	72
NechaP52132	404|PHI:404|PTH11|AAD30436|318829|Magnaporthe	25	248	166	5	25	265	126	360	1e-16	78.6
NechaP52095	4194	24.78	464	321	11	48	504	37	479	3e-34	133
NechaP21273	191|PHI:191|TOM1|AAB08446|39703|Septoria	31.63	449	216	13	4	379	57	487	6e-44	167
NechaP21273	191|PHI:191|TOM1|AAB08446|39703|Septoria	30.66	212	105	6	591	768	521	724	2e-22	100
NechaP86647	2968|PHI:2968|Hxs1|J9VQA5|5207|Cryptococcus	25.22	452	318	9	33	472	20	463	1e-29	119
NechaP3658	1812|PHI:1812|GzZC127|I1RV71|5518|Gibberella	30	490	261	17	1	474	21	444	8e-46	167
NechaP86652	2968|PHI:2968|Hxs1|J9VQA5|5207|Cryptococcus	25	508	340	16	9	509	1	474	4e-31	124
NechaP86655	191|PHI:191|TOM1|AAB08446|39703|Septoria	33.09	278	154	10	457	705	520	794	3e-30	124
NechaP86655	191|PHI:191|TOM1|AAB08446|39703|Septoria	40.91	176	90	4	36	199	105	278	4e-29	121
NechaP97290	1662|PHI:1662|GzCCHC002|I1REJ1|5518|Gibberella	26.07	257	178	4	19	273	647	893	5e-21	94.4
NechaP52144	441|PHI:441|BTP1|CAE55153|40559|Botrytis	24.84	310	192	12	30	307	38	338	1e-08	53.9
NechaP86666	1925|PHI:1925|GzZC240|I1RH59|5518|Gibberella	58.73	659	254	8	2	656	5	649	0	765
NechaP86671	1980|PHI:1980|GzZC295|I1RLF1|5518|Gibberella	35.46	502	277	9	9	510	2	456	1e-93	299
NechaP52268	2895|PHI:2895|F-avi4330|B9JV05|373|Agrobacterium	28.36	342	191	11	24	346	1805	2111	3e-20	90.1
NechaP86674	511|PHI:511|CaNAG4|EAK93098|5476|Candida	30.69	466	315	6	114	575	112	573	1e-66	227
NechaP52313	1260|PHI:1260|FGSG_13944|I1RUC7|5518|Gibberella	37.5	88	55	0	9	96	449	536	2e-09	52.4
NechaP52313	1260|PHI:1260|FGSG_13944|I1RUC7|5518|Gibberella	40.96	83	49	0	14	96	487	569	2e-09	52.4
NechaP52313	1260|PHI:1260|FGSG_13944|I1RUC7|5518|Gibberella	40.96	83	49	0	14	96	520	602	3e-09	51.6
NechaP52111	211|PHI:211|CaTUP1|AAB63195|5476|Candida	31.12	347	200	12	549	859	166	509	1e-32	131
NechaP52111	211|PHI:211|CaTUP1|AAB63195|5476|Candida	30.04	283	168	7	705	965	201	475	2e-23	102
NechaP86681	1555|PHI:1555|GzMyb019|I1RDG6|5518|Gibberella	27.88	477	308	11	46	502	64	524	8e-45	164
NechaP52105	1958|PHI:1958|GzZC273|I1RMD1|5518|Gibberella	26.4	663	351	21	10	547	104	754	7e-43	162
NechaP52092	2968|PHI:2968|Hxs1|J9VQA5|5207|Cryptococcus	23.53	425	309	8	55	477	53	463	8e-27	110
NechaP72741	2563|PHI:2563|DPP3|Q5AH74|5476|Candida	27.52	258	154	10	31	279	25	258	2e-20	87.8
NechaP86689	672|PHI:672|CAS1|AAL35099|192011|Cryptococcus	31.06	895	471	23	24	842	32	856	5e-110	360
NechaP72745	2315|PHI:2315|ChLae1|G4XKY9|5016|Cochliobolus	35.03	294	178	7	63	348	3	291	3e-53	178
NechaP52270	812|PHI:812|MGG_10702|EDJ94108|318829|Magnaporthe	26.42	352	226	13	4	340	38	371	6e-16	76.6
NechaP86697	1936|PHI:1936|GzZC251|I1RFG1|5518|Gibberella	30.12	591	350	15	14	581	4	554	9e-75	255
NechaP86701	1948|PHI:1948|GzZC263|I1RI81|5518|Gibberella	24.47	331	174	12	1	284	1	302	4e-14	72
NechaP86702	2839|PHI:2839|RED1|Q8NJQ2|5016|Cochliobolus	44.54	348	187	3	6	350	4	348	2e-93	284
NechaP52119	2837|PHI:2837|OXI1|D2SZX7|5016|Cochliobolus	32.73	165	98	5	81	235	67	228	2e-13	64.3
NechaP29610	2644|PHI:2644|thioredoxin	32.32	99	55	3	7	99	9	101	6e-12	56.2
NechaP86708	404|PHI:404|PTH11|AAD30436|318829|Magnaporthe	20.43	323	230	11	12	323	102	408	9e-10	57.8
NechaP52316	441|PHI:441|BTP1|CAE55153|40559|Botrytis	24.86	185	124	6	75	249	115	294	1e-08	53.1
NechaP86714	1843|PHI:1843|GzZC158|I1S4X3|5518|Gibberella	25.95	632	347	18	15	550	138	744	7e-42	160
NechaP86719	1404|PHI:1404|GzC2H067|I1RWH6|5518|Gibberella	64.89	131	38	2	339	469	518	640	1e-53	190
NechaP52280	1512|PHI:1512|GzHOME010|I1RXH4|5518|Gibberella	54.96	524	183	7	34	551	25	501	0	546
NechaP52286	4194	24.7	498	316	13	10	482	17	480	5e-34	132
NechaP97322	2558|PHI:2558|DUR31|Q59P00|5476|Candida	25.45	110	82	0	99	208	86	195	9e-09	55.5
NechaP52085	1662|PHI:1662|GzCCHC002|I1REJ1|5518|Gibberella	27.59	482	323	9	31	504	646	1109	3e-57	206
NechaP52302	2654|PHI:2654|DUR1,2|Q59VF3|5476|Candida	30.74	231	135	8	28	258	23	228	8e-11	62
NechaP106474	55|PHI:55|PKS1|AAB08104|5016|Cochliobolus	41.02	1231	658	20	9	1186	11	1226	0	891
NechaP106474	55|PHI:55|PKS1|AAB08104|5016|Cochliobolus	37.76	866	513	14	1375	2233	1675	2521	3e-149	515
NechaP72759	2256|PHI:2256|Xdh1|Q0UA24|13684|Phaeosphaeria	29.32	324	213	5	23	342	28	339	7e-42	150
NechaP52021	2710|PHI:2710|mepB	46.42	377	196	2	75	451	1	371	5e-115	346
NechaP86758	1991|PHI:1991|GzZC306|I1R9K1|5518|Gibberella	25.62	687	416	23	16	644	16	665	2e-34	137
NechaP52289	438|PHI:438|BcBOT1	25.74	474	317	11	18	485	21	465	8e-38	143
NechaP52033	1765|PHI:1765|GzZC080|I1RY91|5518|Gibberella	22.84	578	347	15	5	547	72	585	5e-22	97.4
NechaP86762	181|PHI:181|PGX1|AAK81847|5507|Fusarium	25.71	280	168	13	16	266	35	303	9e-10	58.5
NechaP97340	419|PHI:419|CSH1|AAP93915|5476|Candida	29.01	324	183	10	27	311	2	317	1e-29	115
NechaP52018	1662|PHI:1662|GzCCHC002|I1REJ1|5518|Gibberella	25.19	270	185	7	10	274	647	904	6e-21	93.6
NechaP52168	1880|PHI:1880|GzZC195|I1RJB0|5518|Gibberella	28.96	618	348	25	69	643	23	592	1e-47	175
NechaP52006	3126	28.79	323	197	9	24	323	29	341	2e-28	113
NechaP86773	1950|PHI:1950|GzZC265|I1RDP6|5518|Gibberella	27.78	180	93	5	18	171	31	199	1e-09	57.4
NechaP52369	1838|PHI:1838|GzZC153|I1RGC8|5518|Gibberella	50.39	641	303	7	1	636	15	645	0	613
NechaP106477	2978|PHI:2978|MoCel12A|G4N5V2|148305|Magnaporthe	34.22	263	152	11	2	247	4	262	3e-34	124
NechaP86789	1423|PHI:1423|GzC2H091|I1S2R1|5518|Gibberella	32.45	151	95	5	332	480	287	432	3e-17	84.3
NechaP97353	812|PHI:812|MGG_10702|EDJ94108|318829|Magnaporthe	28.52	277	176	8	22	285	81	348	2e-22	95.5
NechaP52428	1795|PHI:1795|GzZC110|I1RSX8|5518|Gibberella	22.88	389	236	11	15	340	14	401	1e-16	80.1
NechaP72765	1508|PHI:1508|GzHOME003|I1RNA9|5518|Gibberella	32.89	228	140	7	22	240	44	267	5e-23	102
NechaP52370	1283|PHI:1283|FGSG_02153|I1S1I6|5518|Gibberella	52.31	541	239	6	1	524	1	539	3e-174	528
NechaP86810	812|PHI:812|MGG_10702|EDJ94108|318829|Magnaporthe	33.24	358	220	8	1	348	23	371	6e-54	184
NechaP86811	1841|PHI:1841|GzZC156|I1RIY6|5518|Gibberella	24.92	614	390	14	21	574	7	609	4e-54	196
NechaP86813	1960|PHI:1960|GzZC275|I1RDE2|5518|Gibberella	23.63	673	398	21	30	662	31	627	3e-37	147
NechaP52360	1697|PHI:1697|GzZC012|I1S3R7|5518|Gibberella	54.62	509	215	6	1	498	39	542	0	551
NechaP52409	267|PHI:267|MLT1|AAD51594|5476|Candida	26.5	1347	802	37	235	1438	297	1598	5e-116	399
NechaP52381	2968|PHI:2968|Hxs1|J9VQA5|5207|Cryptococcus	26.07	399	270	11	85	472	79	463	2e-23	100
NechaP122923	191|PHI:191|TOM1|AAB08446|39703|Septoria	29.32	440	220	14	10	370	54	481	6e-45	171
NechaP122923	191|PHI:191|TOM1|AAB08446|39703|Septoria	35.14	296	157	10	574	841	513	801	1e-30	126
NechaP86824	2989|PHI:2989|MGG_06243.6|G4N8I4|148305|Magnaporthe	22.61	314	175	8	5	252	200	511	2e-11	63.5
NechaP52439	2315|PHI:2315|ChLae1|G4XKY9|5016|Cochliobolus	38.28	290	171	5	23	304	2	291	3e-67	213
NechaP52364	2269|PHI:2269|Mdh1|0|13684|Phaeosphaeria	30.71	254	165	6	5	251	13	262	9e-33	120
NechaP97368	3381	27.71	498	340	4	37	534	166	643	9e-50	180
NechaP52466	404|PHI:404|PTH11|AAD30436|318829|Magnaporthe	33.72	86	52	1	190	270	273	358	4e-08	52.4
NechaP21517	73|PHI:73|SAP3|AAA34372|5476|Candida	32.13	333	188	12	66	380	72	384	3e-33	127
NechaP28746	1260|PHI:1260|FGSG_13944|I1RUC7|5518|Gibberella	30	120	76	1	23	142	493	604	5e-10	54.7
NechaP28746	1260|PHI:1260|FGSG_13944|I1RUC7|5518|Gibberella	32.18	87	59	0	15	101	518	604	8e-09	50.8
NechaP28746	1260|PHI:1260|FGSG_13944|I1RUC7|5518|Gibberella	27.67	159	90	3	1	142	421	571	4e-08	48.9
NechaP52373	1503|PHI:1503|GzHMG035|I1S828|5518|Gibberella	28.28	244	153	5	272	499	286	523	2e-26	110
NechaP86856	1423|PHI:1423|GzC2H091|I1S2R1|5518|Gibberella	23.04	204	119	6	318	518	278	446	2e-07	52
NechaP52354	2032|PHI:2032|VTL1|G4NGA7|148305|Magnaporthe	30.05	376	238	8	29	401	43	396	7e-48	173
NechaP52459	1662|PHI:1662|GzCCHC002|I1REJ1|5518|Gibberella	31.38	513	325	7	2	493	604	1110	3e-82	278
NechaP86869	2968|PHI:2968|Hxs1|J9VQA5|5207|Cryptococcus	28.57	189	130	3	128	315	117	301	3e-13	67.8
NechaP52477	191|PHI:191|TOM1|AAB08446|39703|Septoria	32.46	382	197	12	10	337	54	428	4e-45	172
NechaP52477	191|PHI:191|TOM1|AAB08446|39703|Septoria	33.45	278	152	8	577	825	521	794	6e-38	149
NechaP52498	566|PHI:566|cel2|AAK19621|5017|Cochliobolus	36.44	461	238	17	6	458	5	418	1e-80	259
NechaP86876	404|PHI:404|PTH11|AAD30436|318829|Magnaporthe	26.79	168	106	3	76	226	203	370	2e-15	73.9
NechaP97387	2839|PHI:2839|RED1|Q8NJQ2|5016|Cochliobolus	30.18	285	153	10	37	282	64	341	6e-20	85.9
NechaP52516	1825|PHI:1825|GzZC140|I1RY88|5518|Gibberella	33.81	559	314	12	8	557	47	558	2e-109	339
NechaP97389	199|PHI:199|AOX1|AAF82788|5499|Cladosporium	26.08	395	217	21	242	588	8	375	2e-13	71.2
NechaP9978	1753|PHI:1753|GzZC068|I1RZN4|5518|Gibberella	55.81	43	18	1	9	51	84	125	6e-12	57.4
NechaP52485	1028|PHI:1028|bcpme1|CAC29255|40559|Botrytis	43.45	336	168	8	2	315	10	345	6e-81	250
NechaP52500	2476|PHI:2476|CcpelA|G8AA67|27358|Colletotrichum	31.49	235	135	7	71	292	39	260	9e-15	71.6
NechaP52650	3381	42.91	522	248	3	2	477	129	646	7e-144	430
NechaP52490	1047|PHI:1047|CTB6|ABK64183|29003|Cercospora	36.52	356	206	10	1	345	1	347	3e-56	187
NechaP102046	2101|PHI:2101|Vacuolar	32.3	486	256	15	15	455	37	494	3e-59	203
NechaP21011	1890|PHI:1890|GzZC205|I1RTH7|5518|Gibberella	45.95	605	283	11	5	593	260	836	8e-179	529
NechaP86897	144|PHI:144|CHT42|AAC05829|29875|Trichoderma	25.68	257	135	6	506	729	66	299	3e-14	73.6
NechaP86899	2968|PHI:2968|Hxs1|J9VQA5|5207|Cryptococcus	23.86	373	261	11	23	382	144	506	6e-21	91.7
NechaP52578	565|PHI:565|chsG|CAA63928|5085|Aspergillus	45.84	746	363	12	1	727	188	911	0	646
NechaP52559	541|PHI:541|LIP1|AAU87359|332648|Botrytis	30.46	371	197	15	34	373	58	398	1e-28	117
NechaP52483	1420|PHI:1420|GzC2H088|I1S172|5518|Gibberella	21.93	415	277	13	61	438	233	637	2e-10	61.2
NechaP52568	3380	47.91	670	308	11	8	646	2	661	0	598
NechaP52652	3381	62.72	515	179	1	42	543	164	678	0	640
NechaP52569	2183|PHI:2183|CPXB|EHA48040.1|148305|Magnaporthe	58.53	750	265	11	5	729	54	782	0	870
NechaP29496	1657|PHI:1657|GzCCCH001|I1RF25|5518|Gibberella	35.29	51	33	0	18	68	1134	1184	5e-07	43.9
NechaP52708	222|PHI:222|PELB|AAD09857|5457|Colletotrichum	38.29	269	137	7	58	323	69	311	3e-45	157
NechaP102056	2968|PHI:2968|Hxs1|J9VQA5|5207|Cryptococcus	38.41	492	291	5	37	527	12	492	2e-112	345
NechaP97410	179|PHI:179|PELA|AAA33338|140110|Nectria	100	242	0	0	1	242	1	242	9e-180	495
NechaP86938	2117|PHI:2117|SPM1|P58371|148305|Magnaporthe	38.99	454	207	10	1	384	1	454	4e-77	248
NechaP97414	2570|PHI:2570|CYB2|Q6FM61|5478|Candida	44.83	58	29	1	975	1032	88	142	1e-07	53.1
NechaP52496	812|PHI:812|MGG_10702|EDJ94108|318829|Magnaporthe	26.69	281	195	5	31	308	65	337	5e-21	91.7
NechaP52508	438|PHI:438|BcBOT1	26.68	476	307	16	21	480	14	463	3e-31	124
NechaP86949	541|PHI:541|LIP1|AAU87359|332648|Botrytis	30.05	203	121	7	193	381	186	381	5e-09	55.8
NechaP86951	1760|PHI:1760|GzZC075|I1RXP9|5518|Gibberella	24.29	667	435	16	1	610	1	654	2e-49	182
NechaP86952	1765|PHI:1765|GzZC080|I1RY91|5518|Gibberella	23.71	426	271	13	6	420	76	458	3e-16	79
NechaP52492	4194	24.03	491	298	12	25	471	17	476	5e-34	131
NechaP52495	1051|PHI:1051|CTB3|ABC79591|29003|Cercospora	24.27	412	244	18	8	372	457	847	2e-15	75.5
NechaP97420	1420|PHI:1420|GzC2H088|I1S172|5518|Gibberella	22.28	395	262	14	37	402	207	585	8e-09	56.2
NechaP86961	1721|PHI:1721|GzZC036|I1S914|5518|Gibberella	54.29	35	16	0	4	38	14	48	8e-07	48.1
NechaP97421	2175|PHI:2175|NMR3|MGG_09705|148305|Magnaporthe	32	150	90	4	7	149	11	155	7e-10	57
NechaP52609	1662|PHI:1662|GzCCHC002|I1REJ1|5518|Gibberella	41.54	573	292	5	3	562	13	555	2e-130	417
NechaP52599	544|PHI:544|BCMFS1|AAF64435|332648|Botrytis	35.6	559	334	5	1	536	37	592	6e-114	352
NechaP29451	233|PHI:233|TOXE|AAD13811|5017|Cochliobolus	35.94	64	41	0	18	81	301	364	8e-08	46.2
NechaP86967	3607	28.69	4699	2817	156	196	4615	201	4644	0	1445
NechaP86969	267|PHI:267|MLT1|AAD51594|5476|Candida	28.98	1387	899	26	56	1375	232	1599	4e-177	571
NechaP97427	513|PHI:513|ARN1	27.09	587	392	11	14	595	41	596	2e-62	217
NechaP97429	513|PHI:513|ARN1	42.26	530	287	6	42	560	66	587	5e-142	426
NechaP97430	2968|PHI:2968|Hxs1|J9VQA5|5207|Cryptococcus	23.65	499	359	11	46	535	2	487	7e-34	132
NechaP97432	2042|PHI:2042|ABC3|Q3Y5V5|148305|Magnaporthe	42.99	1340	673	13	6	1284	12	1321	0	1090
NechaP105641	1904|PHI:1904|GzZC219|I1RHR0|5518|Gibberella	56.13	604	260	3	17	619	19	618	0	710
NechaP86983	1555|PHI:1555|GzMyb019|I1RDG6|5518|Gibberella	25.77	485	329	13	29	492	53	527	4e-38	144
NechaP86985	2968|PHI:2968|Hxs1|J9VQA5|5207|Cryptococcus	24.85	495	354	8	35	519	3	489	5e-30	120
NechaP86986	191|PHI:191|TOM1|AAB08446|39703|Septoria	30.24	453	228	14	11	385	54	496	3e-49	184
NechaP86986	191|PHI:191|TOM1|AAB08446|39703|Septoria	34.16	281	144	8	577	823	521	794	9e-37	145
NechaP52658	1710|PHI:1710|GzZC025|I1RIH3|5518|Gibberella	62.65	656	225	8	153	799	33	677	0	793
NechaP97441	2175|PHI:2175|NMR3|MGG_09705|148305|Magnaporthe	31.98	172	89	7	1	161	1	155	5e-08	50.8
NechaP52478	199|PHI:199|AOX1|AAF82788|5499|Cladosporium	26.29	525	327	16	3	492	2	501	1e-33	133
NechaP52478	199|PHI:199|AOX1|AAF82788|5499|Cladosporium	34.51	113	68	3	468	575	534	645	4e-10	59.7
NechaP97444	544|PHI:544|BCMFS1|AAF64435|332648|Botrytis	25.29	526	369	9	6	515	75	592	1e-43	161
NechaP87001	350|PHI:350|EMP1|AAR06609|318829|Magnaporthe	46.74	92	45	2	18	105	18	109	1e-15	70.9
NechaP52759	812|PHI:812|MGG_10702|EDJ94108|318829|Magnaporthe	38.24	340	196	6	5	333	35	371	1e-66	218
NechaP87007	812|PHI:812|MGG_10702|EDJ94108|318829|Magnaporthe	24.73	364	253	10	15	370	22	372	1e-16	78.6
NechaP52755	2042|PHI:2042|ABC3|Q3Y5V5|148305|Magnaporthe	40	255	141	3	562	812	1072	1318	2e-50	189
NechaP52755	2042|PHI:2042|ABC3|Q3Y5V5|148305|Magnaporthe	39.41	269	136	6	570	812	363	630	2e-46	177
NechaP52736	2329|PHI:2329|CTB4|A0ST42|29003|Cercospora	35.01	477	303	5	31	504	36	508	3e-93	294
NechaP52718	552|PHI:552|BcLCC2|AAK77953|40559|Botrytis	39.63	588	302	15	65	650	45	581	5e-118	365
NechaP52760	4194	25.36	489	296	14	1	442	1	467	2e-33	130
NechaP97459	438|PHI:438|BcBOT1	28.7	460	278	13	13	456	40	465	2e-43	159
NechaP19049	2022|PHI:2022|BUF1|MGG_02252|148305|Magnaporthe	25.25	202	125	9	2	196	33	215	5e-07	46.2
NechaP52764	2895|PHI:2895|F-avi4330|B9JV05|373|Agrobacterium	27.68	336	200	11	27	347	1804	2111	4e-18	83.2
NechaP102067	1260|PHI:1260|FGSG_13944|I1RUC7|5518|Gibberella	30.26	152	97	5	1282	1431	464	608	5e-10	61.6
NechaP102067	1260|PHI:1260|FGSG_13944|I1RUC7|5518|Gibberella	26.99	163	110	5	1305	1465	454	609	4e-07	52.4
NechaP87037	2968|PHI:2968|Hxs1|J9VQA5|5207|Cryptococcus	25.73	513	330	18	39	518	4	498	4e-22	97.1
NechaP87039	538|PHI:538|FRT1|AAU87358|40559|Botrytis	29.89	562	341	18	48	586	29	560	3e-52	188
NechaP97467	2255|PHI:2255|Abd1|Q0U2A0|13684|Phaeosphaeria	53.8	368	157	5	3	359	2	367	4e-131	381
NechaP52820	2837|PHI:2837|OXI1|D2SZX7|5016|Cochliobolus	42.61	230	125	5	31	256	6	232	9e-52	169
NechaP52813	1819|PHI:1819|GzZC134|I1S7J0|5518|Gibberella	36.11	252	145	4	142	379	2	251	2e-41	150
NechaP87043	513|PHI:513|ARN1	24.16	567	398	14	39	586	10	563	1e-34	135
NechaP87044	2042|PHI:2042|ABC3|Q3Y5V5|148305|Magnaporthe	27.23	393	262	10	298	671	790	1177	3e-37	148
NechaP87044	2042|PHI:2042|ABC3|Q3Y5V5|148305|Magnaporthe	47.11	121	64	0	46	166	1200	1320	4e-29	122
NechaP87044	2042|PHI:2042|ABC3|Q3Y5V5|148305|Magnaporthe	40.96	166	94	2	1	165	469	631	6e-28	118
NechaP87044	2042|PHI:2042|ABC3|Q3Y5V5|148305|Magnaporthe	39	100	48	1	574	660	371	470	5e-11	63.9
NechaP87045	3607	31.05	541	345	13	653	1179	4152	4678	9e-70	255
NechaP87045	3607	28.72	571	351	13	1	528	3358	3915	8e-57	214
NechaP87045	3607	24.42	602	361	23	1	528	3905	4486	4e-19	91.7
NechaP87045	3607	24.93	345	211	11	188	492	2997	3333	2e-18	89
NechaP87045	3607	21.6	426	299	11	653	1061	3036	3443	3e-17	85.1
NechaP87045	3607	19.63	433	316	10	654	1074	3595	4007	2e-11	65.9
NechaP87048	1736|PHI:1736|GzZC051|I1S4F3|5518|Gibberella	43.66	497	236	11	1	472	33	510	1e-117	356
NechaP52786	1961|PHI:1961|GzZC276|I1RD74|5518|Gibberella	23.92	301	173	10	152	439	277	534	2e-11	63.5
NechaP97473	3381	23.09	472	325	10	64	519	188	637	1e-12	67.4
NechaP96509	2745|PHI:2745|treY|Q02LV5|287|Pseudomonas	41.18	68	39	1	78	144	25	92	4e-09	56.6
NechaP49672	2240|PHI:2240|Srt1|Q4PBY9|5270|Ustilago	22.41	482	344	8	17	484	25	490	1e-32	128
NechaP85292	2654|PHI:2654|DUR1,2|Q59VF3|5476|Candida	26.29	464	271	16	84	531	46	454	2e-28	118
NechaP85294	1942|PHI:1942|GzZC257|I1RG47|5518|Gibberella	21.98	455	280	18	29	450	7	419	7e-10	59.7
NechaP96512	199|PHI:199|AOX1|AAF82788|5499|Cladosporium	39.05	653	322	14	12	605	5	640	6e-147	442
NechaP49707	441|PHI:441|BTP1|CAE55153|40559|Botrytis	26.67	285	179	10	9	271	33	309	2e-20	89
NechaP49797	513|PHI:513|ARN1	43.74	551	293	7	11	552	37	579	3e-153	454
NechaP49709	1555|PHI:1555|GzMyb019|I1RDG6|5518|Gibberella	25.57	442	303	11	17	442	71	502	1e-38	145
NechaP49675	2038|PHI:2038|Mir1|MGG_02370|148305|Magnaporthe	25.75	268	174	9	2	255	39	295	7e-08	50.1
NechaP49686	1709|PHI:1709|GzZC024|I1RR13|5518|Gibberella	22.51	613	359	16	54	654	20	528	2e-32	130
NechaP96520	2520|PHI:2520|LYS4|Q4WUL6	29.67	482	280	18	42	502	74	517	9e-43	164
NechaP49652	440|PHI:440|PMR1|CAB87245|5476|Candida	28.13	814	501	25	4	772	31	805	1e-72	256
NechaP85316	881|PHI:881|MGG_04556|EDJ96020|318829|Magnaporthe	39.34	211	117	5	5	214	3	203	8e-39	140
NechaP96524	2240|PHI:2240|Srt1|Q4PBY9|5270|Ustilago	28.51	449	313	6	56	498	46	492	7e-45	164
NechaP85322	1749|PHI:1749|GzZC064|I1S4A5|5518|Gibberella	32.5	200	108	7	9	193	2	189	2e-17	82.4
NechaP85323	2240|PHI:2240|Srt1|Q4PBY9|5270|Ustilago	24.12	452	333	6	67	513	47	493	1e-37	142
NechaP21902	1906|PHI:1906|GzZC221|I1RHN1|5518|Gibberella	25.49	510	247	22	1	442	25	469	1e-19	90.5
NechaP85327	714|PHI:714|PKS4	30.16	126	82	2	9	133	1639	1759	7e-09	54.7
NechaP49776	267|PHI:267|MLT1|AAD51594|5476|Candida	35.79	584	334	14	1391	1937	1024	1603	1e-92	330
NechaP49776	267|PHI:267|MLT1|AAD51594|5476|Candida	26.55	708	391	23	646	1273	232	890	5e-48	186
NechaP49776	267|PHI:267|MLT1|AAD51594|5476|Candida	24.69	239	169	5	1703	1937	676	907	7e-14	74.7
NechaP49599	3116	25	200	134	8	54	249	39	226	3e-07	49.7
NechaP49708	2279|PHI:2279|Conserved	28.94	235	140	8	1	215	30	257	4e-20	84.7
NechaP5079	3225	40	380	192	4	8	351	25	404	7e-104	313
NechaP96534	1651|PHI:1651|GzWing023|I1S0U2|5518|Gibberella	33.66	407	246	11	4	396	21	417	2e-71	231
NechaP85344	441|PHI:441|BTP1|CAE55153|40559|Botrytis	24.17	360	225	8	16	328	11	369	4e-20	87.8
NechaP49658	2240|PHI:2240|Srt1|Q4PBY9|5270|Ustilago	24.95	457	333	6	76	524	57	511	2e-35	136
NechaP85350	1662|PHI:1662|GzCCHC002|I1REJ1|5518|Gibberella	23.54	446	309	10	34	464	640	1068	8e-27	112
NechaP63861	2269|PHI:2269|Mdh1|0|13684|Phaeosphaeria	68.42	266	84	0	1	266	1	266	5e-137	389
NechaP19032	1581|PHI:1581|GzOB021|I1RPX8|5518|Gibberella	44.59	231	117	4	12	237	26	250	2e-66	207
NechaP49678	1977|PHI:1977|GzZC292|I1RLM4|5518|Gibberella	80.21	652	108	10	8	650	2	641	0	1022
NechaP96546	1856|PHI:1856|GzZC171|I1S377|5518|Gibberella	25.65	425	269	14	2	397	54	460	7e-32	123
NechaP85373	922|PHI:922|um03615||5270|Ustilago	27.48	615	371	21	8	572	84	673	4e-50	182
NechaP85374	106|PHI:106|CAT1|AAC39448|5476|Candida	47.05	491	239	8	1	481	1	480	5e-150	439
NechaP85379	1974|PHI:1974|GzZC289|I1RQN6|5518|Gibberella	27.75	209	127	7	1	185	1	209	8e-13	67.4
NechaP49795	784|PHI:784|MGG_00056|EDK03390|318829|Magnaporthe	26.84	190	128	5	15	195	32	219	5e-09	53.5
NechaP85384	465|PHI:465|KIN2|AAB63337|5270|Ustilago	40.6	335	186	6	56	386	15	340	4e-60	220
NechaP101763	1369|PHI:1369|GzC2H031|I1RLS1|5518|Gibberella	79.17	312	55	6	1	309	1	305	5e-166	466
NechaP49659	1957|PHI:1957|GzZC272|I1RLS0|5518|Gibberella	77.13	892	184	11	124	1010	1	877	0	1429
NechaP72141	211|PHI:211|CaTUP1|AAB63195|5476|Candida	26.92	156	96	6	708	854	258	404	8e-07	50.1
NechaP85395	2968|PHI:2968|Hxs1|J9VQA5|5207|Cryptococcus	29.65	172	104	3	24	185	318	482	1e-21	89.7
NechaP85396	2968|PHI:2968|Hxs1|J9VQA5|5207|Cryptococcus	32.75	229	151	3	52	278	15	242	7e-31	124
NechaP49827	1956|PHI:1956|GzZC271|I1RLT2|5518|Gibberella	77.49	702	120	10	5	676	2	695	0	1104
NechaP50106	1555|PHI:1555|GzMyb019|I1RDG6|5518|Gibberella	28.22	163	116	1	17	179	56	217	1e-18	85.1
NechaP50106	1555|PHI:1555|GzMyb019|I1RDG6|5518|Gibberella	22.98	235	148	9	174	387	304	526	2e-09	56.6
NechaP85406	1393|PHI:1393|GzC2H056|I1RU69|5518|Gibberella	27.45	153	107	3	651	802	618	767	6e-11	63.5
NechaP49847	1046|PHI:1046|CTB5|ABK64182|29003|Cercospora	30.25	281	171	6	54	321	4	272	7e-33	127
NechaP50068	2067|PHI:2067|ABC4|MGG_00937|148305|Magnaporthe	40.22	1651	873	26	4	1558	3	1635	0	1160
NechaP50432	2393|PHI:2393|Related	25.15	489	297	11	58	531	11	445	1e-38	145
NechaP49855	404|PHI:404|PTH11|AAD30436|318829|Magnaporthe	31.56	320	207	6	16	326	61	377	7e-40	147
NechaP101769	1795|PHI:1795|GzZC110|I1RSX8|5518|Gibberella	23.89	314	195	8	81	378	146	431	1e-17	83.6
NechaP1963	1914|PHI:1914|GzZC229|I1RQ27|5518|Gibberella	72.73	33	9	0	11	43	41	73	2e-10	60.8
NechaP96569	2269|PHI:2269|Mdh1|0|13684|Phaeosphaeria	31.23	253	162	6	37	283	15	261	3e-27	105
NechaP49824	1555|PHI:1555|GzMyb019|I1RDG6|5518|Gibberella	26	477	322	13	6	465	40	502	3e-39	147
NechaP85425	166|PHI:166|CHIP2|AAD53262|5457|Colletotrichum	32.43	404	233	10	167	563	82	452	4e-42	159
NechaP85426	440|PHI:440|PMR1|CAB87245|5476|Candida	27.33	1010	527	33	88	1015	21	905	1e-83	290
NechaP101770	2105|PHI:2105|Calcium	40.41	975	382	20	1	779	115	1086	0	632
NechaP72149	3207	21.95	492	323	14	40	512	89	538	1e-10	61.6
NechaP4540	2644|PHI:2644|thioredoxin	27.38	84	59	1	33	116	5	86	6e-08	48.9
NechaP63885	881|PHI:881|MGG_04556|EDJ96020|318829|Magnaporthe	51.34	337	164	0	3	339	2	338	4e-121	354
NechaP96580	1662|PHI:1662|GzCCHC002|I1REJ1|5518|Gibberella	28.57	448	280	14	60	489	650	1075	4e-42	160
NechaP96581	3329	31.65	278	179	6	28	298	44	317	2e-40	144
NechaP49898	1902|PHI:1902|GzZC217|I1RJS7|5518|Gibberella	30.44	703	354	23	2	582	146	835	1e-77	267
NechaP50013	4194	24.85	499	315	13	13	490	16	475	2e-39	148
NechaP50091	2968|PHI:2968|Hxs1|J9VQA5|5207|Cryptococcus	26.93	505	329	8	34	532	8	478	6e-65	221
NechaP105420	1006|PHI:1006|HMR1|Not	86.9	1122	136	8	1	1118	1	1115	0	2001
NechaP105420	1006|PHI:1006|HMR1|Not	56.45	62	27	0	1203	1264	1127	1188	4e-14	74.7
NechaP101778	101|PHI:101|ALB1|AAC39471|5085|Aspergillus	42.34	1918	1033	28	1	1870	1	1893	0	1500
NechaP63896	1051|PHI:1051|CTB3|ABC79591|29003|Cercospora	38.79	379	224	5	15	389	64	438	1e-80	265
NechaP101780	112|PHI:112|MAK1|AAC49410|140110|Nectria	34.8	477	280	8	56	531	12	458	1e-92	291
NechaP85473	1819|PHI:1819|GzZC134|I1S7J0|5518|Gibberella	31.08	251	167	5	135	380	2	251	2e-33	127
NechaP85474	2269|PHI:2269|Mdh1|0|13684|Phaeosphaeria	41.73	266	149	5	15	275	1	265	2e-68	214
NechaP96600	2256|PHI:2256|Xdh1|Q0UA24|13684|Phaeosphaeria	47.04	355	185	3	38	392	11	362	1e-112	335
NechaP49913	2269|PHI:2269|Mdh1|0|13684|Phaeosphaeria	33.59	256	161	7	21	272	15	265	2e-39	138
NechaP85476	2968|PHI:2968|Hxs1|J9VQA5|5207|Cryptococcus	25.64	472	303	11	55	490	12	471	3e-34	132
NechaP96602	2315|PHI:2315|ChLae1|G4XKY9|5016|Cochliobolus	35.05	291	182	5	30	313	1	291	4e-53	176
NechaP50458	1693|PHI:1693|GzZC008|I1RYA7|5518|Gibberella	41.21	512	271	11	1	497	78	574	6e-120	365
NechaP85484	1662|PHI:1662|GzCCHC002|I1REJ1|5518|Gibberella	28.47	404	248	7	36	406	657	1052	8e-51	185
NechaP72176	812|PHI:812|MGG_10702|EDJ94108|318829|Magnaporthe	34.08	358	219	6	7	352	19	371	5e-58	195
NechaP50009	2240|PHI:2240|Srt1|Q4PBY9|5270|Ustilago	25.11	474	332	5	45	507	39	500	2e-37	142
NechaP85497	419|PHI:419|CSH1|AAP93915|5476|Candida	45.45	330	162	6	30	351	1	320	3e-91	278
NechaP85498	1875|PHI:1875|GzZC190|I1RTS3|5518|Gibberella	30.04	233	131	6	17	219	22	252	3e-24	97.8
NechaP85501	479|PHI:479|MEP1|AAQ07436|199306|Coccidioides	38.89	288	157	8	1	283	1	274	8e-59	190
NechaP49835	1758|PHI:1758|GzZC073|I1RXV2|5518|Gibberella	90.66	824	67	5	1	819	1	819	0	1541
NechaP101789	1848|PHI:1848|GzZC163|I1RXV1|5518|Gibberella	56.45	434	184	4	1	430	1	433	5e-180	516
NechaP63910	2527|PHI:2527|SEC31|Q4X0M4|746128|Aspergillus	24.46	184	125	6	117	295	72	246	3e-09	58.9
NechaP50177	2654|PHI:2654|DUR1,2|Q59VF3|5476|Candida	29.03	155	101	3	202	355	69	215	1e-09	58.5
NechaP85516	1713|PHI:1713|GzZC028|I1RGG4|5518|Gibberella	41.44	625	316	11	95	713	28	608	2e-153	461
NechaP85522	1998|PHI:1998|GzZC313|I1R9B9|5518|Gibberella	23.36	274	172	6	7	258	1	258	8e-13	66.6
NechaP50131	26|PHI:26|CaMDR1|CAA37820|5476|Candida	27.72	184	131	1	56	237	114	297	2e-18	85.9
NechaP72189	2654|PHI:2654|DUR1,2|Q59VF3|5476|Candida	29.02	255	169	5	118	372	6	248	7e-20	91.7
NechaP96628	2411|PHI:2411|Ss-ggt1|A7F946|5180|Sclerotinia	57.81	365	144	3	212	567	130	493	1e-139	416
NechaP96628	2411|PHI:2411|Ss-ggt1|A7F946|5180|Sclerotinia	53	100	39	2	29	125	36	130	6e-25	105
NechaP85540	1420|PHI:1420|GzC2H088|I1S172|5518|Gibberella	23.72	468	279	22	125	546	202	637	1e-10	62.8
NechaP85544	1879|PHI:1879|GzZC194|I1RJB8|5518|Gibberella	24.31	650	358	16	48	607	34	639	6e-38	149
NechaP50493	2895|PHI:2895|F-avi4330|B9JV05|373|Agrobacterium	27.33	311	196	10	36	331	1816	2111	5e-14	70.5
NechaP85547	1773|PHI:1773|GzZC088|I1S409|5518|Gibberella	24.83	302	200	11	56	341	114	404	8e-22	93.2
NechaP96633	2115|PHI:2115|Annexin	39.81	324	188	3	105	427	116	433	2e-65	216
NechaP96635	306|PHI:306|KEX2|AAB80929|5476|Candida	48.48	625	296	9	23	622	28	651	0	585
NechaP72198	2038|PHI:2038|Mir1|MGG_02370|148305|Magnaporthe	50.64	314	147	4	1	311	1	309	2e-86	263
NechaP49878	1759|PHI:1759|GzZC074|I1RXS2|5518|Gibberella	78.92	612	119	4	1	611	1	603	0	999
NechaP63932	2086|PHI:2086|Moatg24|MGG_03638|148305|Magnaporthe	63.62	492	142	6	1	455	1	492	0	611
NechaP85563	24|PHI:24|Avenacinase	26.32	285	163	12	145	407	109	368	1e-07	51.6
NechaP105438	796|PHI:796|MGG_02423|EDJ98620|318829|Magnaporthe	41.59	214	117	2	5	214	3	212	3e-41	144
NechaP96644	2524|PHI:2524|nudC|Q70ZY8|746128|Aspergillus	60.31	194	69	2	3	188	7	200	1e-79	237
NechaP50508	1555|PHI:1555|GzMyb019|I1RDG6|5518|Gibberella	25.99	481	330	7	36	495	69	544	3e-50	179
NechaP50036	157|PHI:157|TOXF|AAD45321|5017|Cochliobolus	27.54	345	220	9	45	384	25	344	3e-22	94
NechaP24053	3381	33.72	433	270	9	16	436	216	643	1e-61	212
NechaP50387	1884|PHI:1884|GzZC199|I1RJ58|5518|Gibberella	43.21	574	285	7	1	550	1	557	2e-155	458
NechaP101803	2373|PHI:2373|YAP1|B9V258|5599|Alternaria	53.85	39	18	0	21	59	162	200	6e-07	48.9
NechaP96655	812|PHI:812|MGG_10702|EDJ94108|318829|Magnaporthe	24.12	398	252	13	4	388	14	374	3e-18	84
NechaP49938	2022|PHI:2022|BUF1|MGG_02252|148305|Magnaporthe	27.53	247	162	8	13	257	27	258	1e-19	83.6
NechaP96658	1662|PHI:1662|GzCCHC002|I1REJ1|5518|Gibberella	29.35	293	193	7	45	334	653	934	4e-32	129
NechaP50389	1694|PHI:1694|GzZC009|I1S3X0|5518|Gibberella	64.45	616	206	6	4	613	28	636	0	788
NechaP15004	2968|PHI:2968|Hxs1|J9VQA5|5207|Cryptococcus	26.57	463	313	11	16	462	12	463	7e-44	160
NechaP85594	455|PHI:455|CAP59|AAC13946|5207|Cryptococcus	35.42	271	160	6	161	425	95	356	9e-41	150
NechaP85596	1278|PHI:1278|FGSG_09150|I1S453|5518|Gibberella	29.82	218	134	8	174	385	81	285	6e-18	85.9
NechaP85599	1263|PHI:1263|FGSG_04770|I1RB84|5518|Gibberella	30.64	532	280	17	93	560	105	611	8e-63	217
NechaP106413	364|PHI:364|MIT1|EAK95175|5476|Candida	27.24	246	149	11	54	288	46	272	7e-17	78.6
NechaP85604	1279|PHI:1279|FGSG_12132|I1RU59|5518|Gibberella	30.02	493	267	19	151	593	168	632	5e-42	161
NechaP85605	1282|PHI:1282|FGSG_07745|I1S9H8|5518|Gibberella	23.71	426	259	13	72	451	247	652	7e-27	115
NechaP85607	2022|PHI:2022|BUF1|MGG_02252|148305|Magnaporthe	29.53	254	162	5	4	240	27	280	8e-27	103
NechaP50496	4194	25.39	508	333	14	4	494	5	483	1e-39	149
NechaP49814	1555|PHI:1555|GzMyb019|I1RDG6|5518|Gibberella	52.36	508	238	2	90	594	39	545	0	573
NechaP50034	1852|PHI:1852|GzZC167|I1S170|5518|Gibberella	72.75	378	99	3	1	378	1	374	0	577
NechaP96676	1662|PHI:1662|GzCCHC002|I1REJ1|5518|Gibberella	29.92	488	311	12	7	489	636	1097	2e-56	203
NechaP50210	541|PHI:541|LIP1|AAU87359|332648|Botrytis	31.51	292	165	7	34	304	58	335	5e-35	134
NechaP50127	3028	23.21	474	233	14	34	487	46	408	5e-19	86.7
NechaP85626	1961|PHI:1961|GzZC276|I1RD74|5518|Gibberella	27.49	291	184	5	249	535	251	518	2e-28	119
NechaP85633	1767|PHI:1767|GzZC082|I1S134|5518|Gibberella	52.09	718	240	10	21	719	5	637	0	739
NechaP101808	1399|PHI:1399|GzC2H062|I1RV74|5518|Gibberella	24.77	214	126	9	169	366	279	473	9e-07	49.3
NechaP50413	3381	33.63	449	262	6	60	478	198	640	6e-59	206
NechaP105442	2540|PHI:2540|IPP1|Q4WX65|746128|Aspergillus	43.84	292	153	5	33	321	110	393	3e-72	230
NechaP25306	2208|PHI:2208|endo-1,4-beta-xylanase	54.44	338	139	2	6	328	10	347	2e-130	384
NechaP96695	885|PHI:885|MGG_02240|EDJ98842|318829|Magnaporthe	52.21	272	113	5	793	1048	765	1035	9e-77	273
NechaP50101	2700|PHI:2700|lac2|J7MF98|5465|Colletotrichum	47.66	598	306	2	11	604	1	595	0	588
NechaP63963	1579|PHI:1579|GzOB019|I1RM25|5518|Gibberella	53.95	645	290	6	357	1001	521	1158	0	745
NechaP96704	981|PHI:981|hopI1|AAL84247|59511|Pseudomonas	50.85	59	28	1	16	73	363	421	3e-11	62
NechaP85688	2968|PHI:2968|Hxs1|J9VQA5|5207|Cryptococcus	22.79	294	174	13	1	252	225	507	5e-13	65.5
NechaP96707	3383	44.07	295	114	6	22	271	48	336	2e-67	216
NechaP96711	1296|PHI:1296|GzAPSES004|I1S0Z2|5518|Gibberella	84.24	660	100	3	18	673	16	675	0	1131
NechaP106419	2898|PHI:2896|BEC1005|CCU82697|62688|Blumeria	31.46	321	184	10	2	314	1	293	1e-36	133
NechaP49896	504|PHI:504|LEU2|CAA42366|4932|Saccharomyces	56.92	383	140	6	2	381	3	363	1e-146	421
NechaP50100	1618|PHI:1618|GzFET5|Q4IQT8|5518|Gibberella	34.43	273	156	6	3	252	4	276	2e-41	147
NechaP63979	286|PHI:286|CLC-A|AAO73005|5207|Cryptococcus	50.07	751	328	12	51	756	37	785	0	726
NechaP63982	1464|PHI:1464|GzCCAAT004|I1RMV4|5518|Gibberella	75.27	182	38	2	1	175	1	182	2e-95	276
NechaP85712	1222|PHI:1222|FGSG_00132|I1RMV6|5518|Gibberella	85.34	1528	215	5	1	1522	1	1525	0	2712
NechaP49895	734|PHI:734|FOW2|BAE98264|5507|Fusarium	92.76	663	42	4	1	658	1	662	0	1219
NechaP72266	2244|PHI:2244|37865|gi|46099354|5270|Ustilago	43.48	345	185	6	53	391	5	345	1e-88	275
NechaP63998	2532|PHI:2532|HEM15|Q4WUA3|746128|Aspergillus	77.92	394	84	2	21	412	27	419	0	646
NechaP85723	3328	78.12	640	138	2	5	642	6	645	0	1028
NechaP49951	26|PHI:26|CaMDR1|CAA37820|5476|Candida	36.7	564	340	4	5	557	6	563	7e-125	380
NechaP72277	96|PHI:96|FAS2|AAA34345|5476|Candida	63.63	1900	636	14	1	1860	1	1885	0	2461
NechaP64009	97|PHI:97|TOXC|AAC62818|5017|Cochliobolus	53.95	2078	944	7	14	2088	4	2071	0	2325
NechaP96746	1022|PHI:1022|XLNR|ABN41464|5508|Fusarium	78.77	942	136	9	1	882	1	938	0	1421
NechaP85733	1941|PHI:1941|GzZC256|I1RGD9|5518|Gibberella	32.81	442	226	9	222	642	294	685	6e-68	240
NechaP85733	1941|PHI:1941|GzZC256|I1RGD9|5518|Gibberella	23.02	126	88	4	15	135	43	164	7e-07	50.1
NechaP50269	2570|PHI:2570|CYB2|Q6FM61|5478|Candida	54.19	489	209	8	6	480	93	580	0	537
NechaP96752	1572|PHI:1572|GzOB012|I1RE94|5518|Gibberella	86.88	823	97	2	1	812	211	1033	0	1506
NechaP105470	2358|PHI:2358|PLD|Q4WZL4|746128|Aspergillus	40.39	515	262	12	346	834	606	1101	6e-111	365
NechaP105470	2358|PHI:2358|PLD|Q4WZL4|746128|Aspergillus	45.39	304	123	4	55	322	140	436	5e-82	284
NechaP105471	3381	24.26	235	173	2	27	259	188	419	2e-09	57
NechaP50163	2654|PHI:2654|DUR1,2|Q59VF3|5476|Candida	33.14	172	94	7	126	290	69	226	6e-07	49.7
NechaP85746	438|PHI:438|BcBOT1	28.71	310	193	11	146	438	187	485	2e-22	100
NechaP85748	2401|PHI:2401|CaRING1|G0T3B3|456327|Xanthomonas	28.19	149	87	5	227	360	9	152	6e-08	50.4
NechaP72303	2843|PHI:2843|CnPlb1|Q9P8P2|5207|Cryptococcus	28.84	423	220	21	200	593	56	426	5e-24	104
NechaP50185	3236	30.82	451	240	17	110	520	101	519	7e-53	191
NechaP49923	285|PHI:285|CHSV|AAO49384|5507|Fusarium	88.89	1864	201	5	1	1859	1	1863	0	3458
NechaP123231	2302|PHI:2302|CHS5|G4XVC0|148305|Magnaporthe	68.95	1807	507	19	1	1773	1	1787	0	2512
NechaP50108	1288|PHI:1288|FGSG_07812|I1RE83|5518|Gibberella	85.27	421	49	3	62	481	13	421	0	697
NechaP72313	3037	87.87	536	64	1	1	535	1	536	0	1009
NechaP72323	1571|PHI:1571|GzOB011|I1RE76|5518|Gibberella	85.44	158	23	0	3	160	6	163	7e-100	286
NechaP72327	2058|PHI:2058|LHS1|MGG_06648.5|148305|Magnaporthe	26.35	520	321	16	2	470	23	531	3e-36	144
NechaP106423	2301|PHI:2301|CHS7|B5M4A8|148305|Magnaporthe	62.69	780	228	7	4	733	5	771	0	981
NechaP105480	2336|PHI:2336|NIA1|O00101|13684|Stagonospora	61.01	895	331	6	4	897	14	891	0	1135
NechaP96780	2101|PHI:2101|Vacuolar	32.69	416	231	13	71	453	96	495	5e-52	183
NechaP50174	2601|PHI:2601|Asc1|P83774|746128|Aspergillus	26.45	155	94	4	79	232	87	222	2e-07	49.7
NechaP72345	2981|PHI:2981|Ctf1|A6N6J8|59765|Fusarium	92.17	881	65	4	32	909	24	903	0	1674
NechaP49995	259|PHI:259|GPI7|AAL83897|5476|Candida	27.13	247	125	12	185	420	184	386	1e-10	62.8
NechaP50483	1481|PHI:1481|GzHMG013|I1RE60|5518|Gibberella	62.68	477	157	8	1	473	1	460	0	517
NechaP50094	860|PHI:860|MSP1|AAX07670|318829|Magnaporthe	73.47	377	91	5	1	369	1	376	0	565
NechaP85791	443|PHI:443|CBL1||5518|Fusarium	92.15	446	25	1	1	446	1	436	0	829
NechaP50420	1616|PHI:1616|GzssDB001|I1RE55|5518|Gibberella	66.6	1045	280	15	1	1020	1	1001	0	1335
NechaP122871	1542|PHI:1542|GzMyb006|I1RE51|5518|Gibberella	89.9	673	64	4	1	671	1	671	0	1204
NechaP101864	2911|PHI:2911|Ss-pth2|A7F6V9|5180|Sclerotinia	78.69	610	129	1	1	609	37	646	0	1018
NechaP64088	210|PHI:210|CAP1|AAD42978|5476|Candida	35.91	557	310	13	8	541	13	545	2e-96	304
NechaP96804	1570|PHI:1570|GzOB010|I1RE46|5518|Gibberella	87.46	885	90	7	1	884	1	865	0	1560
NechaP50578	1541|PHI:1541|GzFlbD|I1RE42|5518|Gibberella	61.86	291	90	6	3	272	8	298	3e-100	296
NechaP72372	2544|PHI:2544|PAB1|Q4WK03|746128|Aspergillus	34.94	83	53	1	74	156	233	314	2e-09	55.8
NechaP50752	2802|PHI:2802|3hnr|B2ZRQ4|93612|Setosphaeria	30.53	262	159	5	1	245	9	264	4e-27	104
NechaP50794	346|PHI:346|CRU1|AAN10186|5270|Ustilago	53.85	507	196	11	90	563	65	566	5e-175	511
NechaP123234	2510|PHI:2510|msdS/AfmsdC|Q6PWQ1|746128|Aspergillus	30.62	552	284	20	78	604	21	498	3e-53	195
NechaP72399	2640|PHI:2640|CNB1|C4XXN5|36911|Candida	37.14	140	79	4	8	142	21	156	9e-21	82.8
NechaP64130	2395|PHI:2395|GzSYN1|I1RBM2|5518|Gibberella	27.36	106	76	1	220	325	192	296	4e-07	48.5
NechaP72407	2042|PHI:2042|ABC3|Q3Y5V5|148305|Magnaporthe	40.48	294	145	8	507	777	365	651	2e-52	196
NechaP72407	2042|PHI:2042|ABC3|Q3Y5V5|148305|Magnaporthe	31.78	494	298	17	270	735	821	1303	2e-52	195
NechaP96840	1356|PHI:1356|GzC2H016|I1RE06|5518|Gibberella	80.59	639	97	13	1	622	1	629	0	994
NechaP50522	2908|PHI:2908|CYP51B|I1RBR4|5518|Fusarium	22.83	254	170	5	254	487	251	498	2e-13	69.7
NechaP50976	2130|PHI:2130|MoHox4|MGG_06285|148305|Magnaporthe	44.16	394	207	5	7	398	57	439	5e-91	304
NechaP72437	2844|PHI:2844|BRM2|O93802|5599|Alternaria	31.25	272	163	8	13	273	8	266	5e-28	107
NechaP72439	1869|PHI:1869|GzZC184|I1RDY4|5518|Gibberella	92.6	554	38	3	1	552	1	553	0	1066
NechaP85876	2968|PHI:2968|Hxs1|J9VQA5|5207|Cryptococcus	30.9	466	291	13	36	493	21	463	2e-55	194
NechaP85878	1902|PHI:1902|GzZC217|I1RJS7|5518|Gibberella	22.81	228	153	3	397	602	612	838	1e-15	78.2
NechaP85878	1902|PHI:1902|GzZC217|I1RJS7|5518|Gibberella	51.02	49	24	0	5	53	46	94	9e-12	65.9
NechaP96868	923|PHI:923|um03616||5270|Ustilago	28	475	239	13	153	537	237	698	2e-45	167
NechaP72448	1254|PHI:1254|FGSG_07742|I1RDX3|5518|Gibberella	80.46	742	133	8	1	736	1	736	0	1135
NechaP85892	1824|PHI:1824|GzZC139|I1RYC6|5518|Gibberella	27.98	554	301	15	619	1090	39	576	1e-50	187
NechaP50780	2968|PHI:2968|Hxs1|J9VQA5|5207|Cryptococcus	29.46	465	311	9	18	474	13	468	4e-59	204
NechaP85900	1878|PHI:1878|GzZC193|I1RPF6|5518|Gibberella	26.73	520	331	12	21	501	101	609	2e-44	166
NechaP101905	800|PHI:800|MGG_13324|EDK00897|318829|Magnaporthe	26.04	384	242	15	139	501	114	476	2e-14	74.3
NechaP85908	1209|PHI:1209|FGSG_04770|I1RLH1|5518|Gibberella	29.11	316	179	8	33	338	60	340	7e-29	119
NechaP96887	1778|PHI:1778|GzZC093|I1S353|5518|Gibberella	31.7	552	326	13	1	534	1	519	5e-79	260
NechaP96892	1161|PHI:1161|MgMfs1|A4ZGP3|54734|Mycosphaerella	33.19	470	296	8	11	473	59	517	2e-68	231
NechaP105529	404|PHI:404|PTH11|AAD30436|318829|Magnaporthe	21.21	264	170	3	10	239	103	362	3e-16	77.8
NechaP51041	2834|PHI:2834|LAM1|C3PTB1|5016|Cochliobolus	38.46	156	93	3	688	840	1	156	1e-26	111
NechaP64202	1555|PHI:1555|GzMyb019|I1RDG6|5518|Gibberella	24.79	484	339	7	51	520	73	545	8e-46	167
NechaP96899	1872|PHI:1872|GzZC187|I1RTU2|5518|Gibberella	34.84	221	136	3	85	305	155	367	3e-44	158
NechaP96899	1872|PHI:1872|GzZC187|I1RTU2|5518|Gibberella	50.7	71	33	2	1	71	1	69	3e-16	77.4
NechaP26612	364|PHI:364|MIT1|EAK95175|5476|Candida	39.86	276	144	9	4	271	7	268	8e-56	189
NechaP21043	1428|PHI:1428|GzC2H096|I1S5D9|5518|Gibberella	38.03	568	297	16	187	728	41	579	2e-114	360
NechaP72484	1057|PHI:1057|MTP1|ABP98949|318829|Magnaporthe	56.89	457	192	3	19	471	47	502	0	559
NechaP50603	2020|PHI:2020|Tup1|XP_759427|5270|Ustilago	22.74	343	188	9	355	658	423	727	8e-19	88.6
NechaP50603	2020|PHI:2020|Tup1|XP_759427|5270|Ustilago	24.81	258	156	7	470	697	476	725	9e-14	72.4
NechaP50603	2020|PHI:2020|Tup1|XP_759427|5270|Ustilago	32.8	125	74	3	540	658	415	535	8e-11	62.8
NechaP105534	2086|PHI:2086|Moatg24|MGG_03638|148305|Magnaporthe	33.08	130	81	2	153	276	63	192	9e-15	73.9
NechaP72493	463|PHI:463|HSP90|AAA02743|4932|Saccharomyces	72.14	707	192	4	2	703	3	709	0	987
NechaP72498	2808|PHI:2808|gas1|Q2KN79|59765|Fusarium	74.07	540	135	4	1	536	1	539	0	793
NechaP72504	1552|PHI:1552|GzMyb016|I1S0N5|5518|Gibberella	42.9	324	165	6	994	1316	172	476	7e-77	277
NechaP72504	1552|PHI:1552|GzMyb016|I1S0N5|5518|Gibberella	53.16	158	71	2	1577	1732	478	634	7e-48	185
NechaP85964	2563|PHI:2563|DPP3|Q5AH74|5476|Candida	26.94	193	116	4	82	266	83	258	1e-14	71.2
NechaP85968	1257|PHI:1257|FGSG_13509|I1RSK0|5518|Gibberella	30.33	244	128	9	228	457	268	483	2e-15	76.6
NechaP85971	1566|PHI:1566|GzOB006|I1RC95|5518|Gibberella	44.38	329	176	2	107	428	59	387	8e-94	289
NechaP72515	812|PHI:812|MGG_10702|EDJ94108|318829|Magnaporthe	32.92	319	207	7	69	384	57	371	8e-52	179
NechaP50742	441|PHI:441|BTP1|CAE55153|40559|Botrytis	23.33	270	177	8	13	266	42	297	3e-12	64.3
NechaP50615	2199|PHI:2199|MoRgs8|XP_001405673|148305|Magnaporthe	41.42	606	282	12	1	555	14	597	3e-154	456
NechaP50600	1828|PHI:1828|GzZC143|I1S351|5518|Gibberella	51.77	651	286	9	1	631	55	697	0	654
NechaP85994	189|PHI:189|SSK1|AAD55813|5476|Candida	27.81	151	84	5	57	186	506	652	2e-14	68.9
NechaP50653	3138	98.24	567	10	0	1	567	6	572	0	1164
NechaP101930	3068	38.38	99	60	1	173	270	833	931	2e-10	61.2
NechaP101930	3068	36.59	82	52	0	193	274	1010	1091	2e-09	58.5
NechaP72534	410|PHI:410|SOD2|AAW56834|5207|Cryptococcus	52.06	194	90	2	6	197	29	221	3e-69	213
NechaP105554	2638|PHI:2638|Ilv3A|Q4X099|746128|Aspergillus	74.3	603	142	4	8	597	2	604	0	886
NechaP86026	2608|PHI:2608|ACRTS2|F8R4Y0|5599|Alternaria	29.57	115	65	4	27	139	1920	2020	9e-09	53.5
NechaP73923	3005|PHI:3005|ClpP|P63786|1280|Staphylococcus	51.75	143	60	3	1	143	62	195	2e-44	145
NechaP96944	3311	47.83	667	239	13	13	586	6	656	0	555
NechaP50649	2968|PHI:2968|Hxs1|J9VQA5|5207|Cryptococcus	25.11	470	320	9	33	497	21	463	4e-34	132
NechaP96947	2968|PHI:2968|Hxs1|J9VQA5|5207|Cryptococcus	23.87	486	351	8	12	487	12	488	5e-47	170
NechaP96949	1932|PHI:1932|GzZC247|I1REH9|5518|Gibberella	83.65	477	57	7	1	462	1	471	0	768
NechaP50638	1662|PHI:1662|GzCCHC002|I1REJ1|5518|Gibberella	25.35	493	329	15	4	489	615	1075	4e-30	122
NechaP105559	105|PHI:105|PLB1|AAC61890|5476|Candida	40.74	567	298	16	56	608	22	564	1e-135	412
NechaP51034	1662|PHI:1662|GzCCHC002|I1REJ1|5518|Gibberella	71.91	502	124	3	9	502	619	1111	0	726
NechaP50663	1662|PHI:1662|GzCCHC002|I1REJ1|5518|Gibberella	68.89	585	133	7	30	605	17	561	0	745
NechaP86057	2256|PHI:2256|Xdh1|Q0UA24|13684|Phaeosphaeria	24.57	289	184	7	60	341	66	327	2e-07	49.7
NechaP22260	1931|PHI:1931|GzZC246|I1REJ4|5518|Gibberella	41.09	662	340	15	1	633	5	645	7e-160	476
NechaP106438	243|PHI:243|CHIP6|AAD00894|5457|Colletotrichum	42.44	655	320	15	26	643	3	637	8e-165	502
NechaP72577	2710|PHI:2710|mepB	71.75	400	107	2	71	464	1	400	0	597
NechaP101954	1423|PHI:1423|GzC2H091|I1S2R1|5518|Gibberella	55.34	103	45	1	204	305	468	570	9e-29	113
NechaP72601	1681|PHI:1681|GzNF001|I1REN7|5518|Gibberella	68.43	2271	702	7	1	2268	1	2259	0	3163
NechaP64343	2994|PHI:2994|MGG_06355.6|G4N7V2|148305|Magnaporthe	25.29	609	356	25	8	545	29	609	4e-29	121
NechaP22695	1763|PHI:1763|GzZC078|I1RXE8|5518|Gibberella	50.29	523	251	4	1	516	95	615	9e-170	498
NechaP50557	404|PHI:404|PTH11|AAD30436|318829|Magnaporthe	27.93	358	245	8	26	376	30	381	5e-43	158
NechaP97001	748|PHI:748|um00446|Not	28.11	747	421	25	19	702	96	789	2e-55	201
NechaP50796	1880|PHI:1880|GzZC195|I1RJB0|5518|Gibberella	33.96	586	329	15	13	547	21	599	2e-92	296
NechaP97002	2968|PHI:2968|Hxs1|J9VQA5|5207|Cryptococcus	25.63	476	330	8	50	512	4	468	1e-38	145
NechaP50660	1711|PHI:1711|GzZC026|I1REQ5|5518|Gibberella	84.23	444	64	4	29	469	33	473	0	761
NechaP101968	485|PHI:485|FTR1|AAF69680|5476|Candida	52.6	327	150	4	1	326	1	323	7e-118	347
NechaP64357	2920|PHI:2920|FET3-1|E3QRA4|31870|Colletotrichum	69.89	568	167	2	4	567	17	584	0	863
NechaP50921	267|PHI:267|MLT1|AAD51594|5476|Candida	27.96	633	407	12	750	1345	982	1602	2e-66	244
NechaP50921	267|PHI:267|MLT1|AAD51594|5476|Candida	26.02	588	355	14	222	734	304	886	2e-47	184
NechaP50921	267|PHI:267|MLT1|AAD51594|5476|Candida	25.22	230	160	7	1125	1346	683	908	8e-11	64.3
NechaP23522	2908|PHI:2908|CYP51B|I1RBR4|5518|Fusarium	23.02	378	249	10	166	517	138	499	9e-17	80.5
NechaP50873	2336|PHI:2336|NIA1|O00101|13684|Stagonospora	33.58	265	154	7	196	442	623	883	7e-36	139
NechaP50873	2336|PHI:2336|NIA1|O00101|13684|Stagonospora	36.25	80	50	1	6	85	537	615	2e-10	60.1
NechaP50929	438|PHI:438|BcBOT1	26.63	398	251	14	2	381	89	463	2e-32	125
NechaP86138	2393|PHI:2393|Related	24.85	491	306	13	58	536	19	458	3e-32	126
NechaP86139	1374|PHI:1374|GzC2H037|I1RN37|5518|Gibberella	25.3	498	321	13	356	833	308	774	5e-31	127
NechaP86143	2393|PHI:2393|Related	30.77	468	274	8	92	547	19	448	8e-59	202
NechaP86144	2034|PHI:2034|MFP1|G4MZY1|148305|Magnaporthe	31.63	196	121	5	7	201	305	488	1e-15	73.9
NechaP50613	541|PHI:541|LIP1|AAU87359|332648|Botrytis	30.94	278	173	8	91	354	128	400	2e-24	104
NechaP86149	716|PHI:716|ZEB1|ABB90284|5518|Fusarium	28.57	189	126	5	44	225	124	310	3e-12	66.2
NechaP101970	1358|PHI:1358|GzC2H018|I1RG87|5518|Gibberella	80.95	105	19	1	16	120	16	119	1e-52	179
NechaP86156	541|PHI:541|LIP1|AAU87359|332648|Botrytis	28.42	549	292	19	27	506	47	563	2e-43	161
NechaP64360	1662|PHI:1662|GzCCHC002|I1REJ1|5518|Gibberella	26.12	448	296	11	36	472	645	1068	9e-36	140
NechaP86172	1870|PHI:1870|GzZC185|I1RDS9|5518|Gibberella	29.18	658	394	17	13	632	9	632	7e-69	239
NechaP51188	1662|PHI:1662|GzCCHC002|I1REJ1|5518|Gibberella	25.87	460	315	14	6	450	627	1075	2e-31	126
NechaP97036	2570|PHI:2570|CYB2|Q6FM61|5478|Candida	35.04	371	209	8	37	377	192	560	6e-64	214
NechaP97037	1555|PHI:1555|GzMyb019|I1RDG6|5518|Gibberella	23.77	244	174	4	36	270	63	303	4e-16	78.2
NechaP51284	2117|PHI:2117|SPM1|P58371|148305|Magnaporthe	36.88	423	221	11	33	415	39	455	8e-65	217
NechaP97040	3329	34.89	278	169	7	48	317	44	317	5e-44	154
NechaP97041	1662|PHI:1662|GzCCHC002|I1REJ1|5518|Gibberella	26.02	442	311	7	27	461	642	1074	2e-39	152
NechaP51186	1902|PHI:1902|GzZC217|I1RJS7|5518|Gibberella	27.14	770	390	23	4	628	182	925	9e-65	229
NechaP86188	1773|PHI:1773|GzZC088|I1S409|5518|Gibberella	23.55	276	199	5	9	279	134	402	1e-16	77
NechaP51294	3381	37.61	452	276	4	45	492	190	639	3e-87	283
NechaP86194	1883|PHI:1883|GzZC198|I1RJ71|5518|Gibberella	42.77	795	398	16	19	792	19	777	0	572
NechaP97050	224|PHI:224|PEP2|AAK11167|140110|Nectria	73.08	234	45	3	1	217	1	233	7e-125	354
NechaP51169	1394|PHI:1394|GzC2H057|I1RUL1|5518|Gibberella	40.92	650	287	13	1	578	127	751	4e-154	462
NechaP86200	2269|PHI:2269|Mdh1|0|13684|Phaeosphaeria	28.57	266	165	8	8	270	23	266	4e-24	96.7
NechaP51266	1781|PHI:1781|GzZC096|I1S389|5518|Gibberella	61.03	721	237	12	2	707	10	701	0	884
NechaP97054	2844|PHI:2844|BRM2|O93802|5599|Alternaria	30.74	257	156	6	3	239	9	263	7e-28	106
NechaP51202	2968|PHI:2968|Hxs1|J9VQA5|5207|Cryptococcus	24.52	518	344	14	54	555	8	494	2e-31	125
NechaP97057	1662|PHI:1662|GzCCHC002|I1REJ1|5518|Gibberella	34.35	425	268	4	21	443	634	1049	4e-78	265
NechaP51212	487|PHI:487|MHP1|O94196|148305|Magnaporthe	63.46	104	28	3	1	98	1	100	1e-38	125
NechaP51179	1048|PHI:1048|CTB7|ABK64184|29003|Cercospora	30.35	425	236	14	5	382	7	418	5e-47	167
NechaP97061	538|PHI:538|FRT1|AAU87358|40559|Botrytis	28.66	506	325	15	6	498	79	561	1e-43	161
NechaP72641	1992|PHI:1992|GzZC307|I1R983|5518|Gibberella	33.33	120	79	1	4	122	548	667	7e-17	77.4
NechaP51164	2240|PHI:2240|Srt1|Q4PBY9|5270|Ustilago	23.4	453	335	7	82	527	51	498	6e-31	123
NechaP86231	1358|PHI:1358|GzC2H018|I1RG87|5518|Gibberella	52.8	161	71	3	125	282	149	307	2e-44	160
NechaP48131	511|PHI:511|CaNAG4|EAK93098|5476|Candida	21.2	434	291	14	8	428	109	504	3e-08	53.5
NechaP95906	2835|PHI:2835|RED2|C3JXE8|5016|Cochliobolus	43.78	201	103	1	21	211	60	260	6e-51	170
NechaP48316	2968|PHI:2968|Hxs1|J9VQA5|5207|Cryptococcus	27.71	332	221	8	2	324	155	476	2e-28	112
NechaP84318	1820|PHI:1820|GzZC135|I1S8F7|5518|Gibberella	34.56	298	175	5	315	606	1	284	2e-40	147
NechaP84321	1838|PHI:1838|GzZC153|I1RGC8|5518|Gibberella	26.92	234	140	6	19	227	330	557	6e-13	65.9
NechaP48216	1856|PHI:1856|GzZC171|I1S377|5518|Gibberella	24.09	411	273	13	3	389	60	455	3e-20	89.7
NechaP48201	2570|PHI:2570|CYB2|Q6FM61|5478|Candida	36.41	368	201	8	44	382	195	558	7e-66	220
NechaP95913	2839|PHI:2839|RED1|Q8NJQ2|5016|Cochliobolus	22.99	261	158	8	95	328	102	346	6e-07	47.8
NechaP84327	441|PHI:441|BTP1|CAE55153|40559|Botrytis	29.82	285	182	9	10	279	15	296	9e-27	107
NechaP48111	1425|PHI:1425|GzC2H093|I1S3M6|5518|Gibberella	55.21	672	258	14	27	689	268	905	0	680
NechaP48029	2968|PHI:2968|Hxs1|J9VQA5|5207|Cryptococcus	24.51	514	343	14	22	502	19	520	2e-31	124
NechaP8176	2802|PHI:2802|3hnr|B2ZRQ4|93612|Setosphaeria	27.08	240	166	2	2	241	13	243	3e-24	96.3
NechaP5758	2256|PHI:2256|Xdh1|Q0UA24|13684|Phaeosphaeria	27.89	355	223	8	17	366	32	358	2e-36	134
NechaP95917	2269|PHI:2269|Mdh1|0|13684|Phaeosphaeria	30.88	204	108	9	11	206	14	192	9e-09	52.8
NechaP48085	1555|PHI:1555|GzMyb019|I1RDG6|5518|Gibberella	23.21	405	282	7	17	404	74	466	1e-25	107
NechaP47971	133|PHI:133|AKT1|BAA36588|5599|Alternaria	29.26	564	338	14	39	573	47	578	3e-52	187
NechaP47957	2256|PHI:2256|Xdh1|Q0UA24|13684|Phaeosphaeria	27.24	301	191	9	5	293	18	302	5e-25	101
NechaP48346	144|PHI:144|CHT42|AAC05829|29875|Trichoderma	25.58	387	212	15	50	393	44	397	7e-20	91.3
NechaP3047	438|PHI:438|BcBOT1	29.1	488	313	16	9	478	17	489	1e-49	177
NechaP48336	1377|PHI:1377|GzC2H040|I1RQ34|5518|Gibberella	23.14	242	151	6	79	300	505	731	5e-08	52.8
NechaP71506	2315|PHI:2315|ChLae1|G4XKY9|5016|Cochliobolus	36.43	291	177	6	59	342	2	291	2e-53	178
NechaP47960	697|PHI:697|ugt51E1|AAM81358|5022|Leptosphaeria	29.76	336	191	16	95	407	82	395	6e-27	108
NechaP71510	2968|PHI:2968|Hxs1|J9VQA5|5207|Cryptococcus	33.8	500	312	8	38	535	3	485	2e-91	292
NechaP12083	1923|PHI:1923|GzZC238|I1RHB3|5518|Gibberella	42.02	633	312	12	7	625	31	622	8e-166	492
NechaP48301	2895|PHI:2895|F-avi4330|B9JV05|373|Agrobacterium	26.36	330	193	15	33	343	1813	2111	3e-07	49.7
NechaP11770	1831|PHI:1831|GzZC146|I1RHT9|5518|Gibberella	60.21	480	188	2	149	628	1	477	0	599
NechaP48128	2020|PHI:2020|Tup1|XP_759427|5270|Ustilago	39.77	259	132	3	614	848	466	724	3e-46	176
NechaP48128	2020|PHI:2020|Tup1|XP_759427|5270|Ustilago	33.76	311	175	6	652	932	415	724	1e-40	158
NechaP48128	2020|PHI:2020|Tup1|XP_759427|5270|Ustilago	34.41	311	172	7	736	1015	415	724	5e-39	153
NechaP48128	2020|PHI:2020|Tup1|XP_759427|5270|Ustilago	29.79	329	188	9	504	806	413	724	2e-31	129
NechaP48128	2020|PHI:2020|Tup1|XP_759427|5270|Ustilago	35.21	213	122	5	820	1017	415	626	1e-29	123
NechaP48128	2020|PHI:2020|Tup1|XP_759427|5270|Ustilago	33.33	153	86	3	904	1049	415	558	7e-18	86.3
NechaP20553	211|PHI:211|CaTUP1|AAB63195|5476|Candida	31.55	168	94	5	628	782	260	419	4e-12	66.6
NechaP20553	211|PHI:211|CaTUP1|AAB63195|5476|Candida	24.3	214	136	6	676	866	208	418	1e-11	65.1
NechaP20553	211|PHI:211|CaTUP1|AAB63195|5476|Candida	30	170	98	8	628	779	343	509	5e-07	50.4
NechaP84379	1905|PHI:1905|GzZC220|I1RHN3|5518|Gibberella	31.47	232	154	3	30	259	243	471	7e-32	122
NechaP84382	881|PHI:881|MGG_04556|EDJ96020|318829|Magnaporthe	27.34	278	171	8	68	342	64	313	4e-17	79.3
NechaP48074	2968|PHI:2968|Hxs1|J9VQA5|5207|Cryptococcus	24.38	443	309	11	21	448	19	450	4e-36	138
NechaP84384	1884|PHI:1884|GzZC199|I1RJ58|5518|Gibberella	26.96	115	74	3	299	408	392	501	5e-07	48.9
NechaP84387	1919|PHI:1919|GzZC234|I1RCQ4|5518|Gibberella	25.81	585	340	23	10	571	48	561	3e-33	135
NechaP84388	1814|PHI:1814|GzZC129|I1RV04|5518|Gibberella	29.48	553	283	17	184	671	140	650	1e-54	199
NechaP95945	2256|PHI:2256|Xdh1|Q0UA24|13684|Phaeosphaeria	31.31	297	188	6	3	292	16	303	4e-30	116
NechaP48371	2968|PHI:2968|Hxs1|J9VQA5|5207|Cryptococcus	24.16	505	351	12	49	543	8	490	2e-39	148
NechaP48290	1887|PHI:1887|GzZC202|I1RHZ6|5518|Gibberella	26.52	396	248	11	16	398	168	533	4e-31	125
NechaP84400	513|PHI:513|ARN1	26.02	565	396	11	11	568	37	586	1e-53	192
NechaP48150	1880|PHI:1880|GzZC195|I1RJB0|5518|Gibberella	62.33	600	199	5	9	582	16	614	0	733
NechaP95951	2968|PHI:2968|Hxs1|J9VQA5|5207|Cryptococcus	23.92	464	325	9	60	509	14	463	2e-33	130
NechaP84411	3126	28.94	432	261	12	1	424	1	394	3e-46	164
NechaP123214	144|PHI:144|CHT42|AAC05829|29875|Trichoderma	26.32	209	123	5	574	769	111	301	1e-12	68.2
NechaP48380	4203	23.58	212	145	5	380	582	107	310	7e-07	48.9
NechaP84417	1956|PHI:1956|GzZC271|I1RLT2|5518|Gibberella	28.15	579	337	22	15	549	13	556	9e-46	170
NechaP48261	1555|PHI:1555|GzMyb019|I1RDG6|5518|Gibberella	22.11	303	204	8	20	299	73	366	1e-16	79.7
NechaP1197	1956|PHI:1956|GzZC271|I1RLT2|5518|Gibberella	30.52	439	273	9	10	426	173	601	1e-51	184
NechaP84424	1769|PHI:1769|GzZC084|I1RXB2|5518|Gibberella	24.02	433	262	13	181	605	85	458	7e-16	77.8
NechaP47932	1662|PHI:1662|GzCCHC002|I1REJ1|5518|Gibberella	34.36	422	263	6	56	472	646	1058	1e-68	240
NechaP48020	2654|PHI:2654|DUR1,2|Q59VF3|5476|Candida	30.82	159	101	3	191	348	65	215	1e-09	58.5
NechaP95966	1560|PHI:1560|GzNEG002|I1RTR8|5518|Gibberella	81.97	244	44	0	1	244	1	244	9e-154	430
NechaP95968	1874|PHI:1874|GzZC189|I1RTS5|5518|Gibberella	70.59	493	124	6	1	474	11	501	0	673
NechaP84433	112|PHI:112|MAK1|AAC49410|140110|Nectria	51.77	452	176	2	9	418	7	458	4e-168	481
NechaP48265	1555|PHI:1555|GzMyb019|I1RDG6|5518|Gibberella	28.5	214	146	3	11	221	61	270	3e-18	84.3
NechaP84439	1902|PHI:1902|GzZC217|I1RJS7|5518|Gibberella	23.83	810	415	27	21	650	40	827	6e-45	171
NechaP48160	1662|PHI:1662|GzCCHC002|I1REJ1|5518|Gibberella	31.42	436	274	2	38	455	646	1074	1e-71	247
NechaP47977	812|PHI:812|MGG_10702|EDJ94108|318829|Magnaporthe	30.45	335	217	6	6	333	46	371	4e-38	140
NechaP63257	26|PHI:26|CaMDR1|CAA37820|5476|Candida	27.06	462	320	11	74	526	111	564	6e-43	160
NechaP84447	1688|PHI:1688|GzZC003|I1RWZ1|5518|Gibberella	31.51	476	269	14	88	516	186	651	2e-57	202
NechaP48359	1161|PHI:1161|MgMfs1|A4ZGP3|54734|Mycosphaerella	22.63	486	344	12	5	473	32	502	3e-14	72.8
NechaP48289	1693|PHI:1693|GzZC008|I1RYA7|5518|Gibberella	40.5	521	274	12	1	505	78	578	3e-129	390
NechaP48024	2030|PHI:2030|TGL3-1|G4N492|148305|Magnaporthe	45.67	716	317	13	12	680	24	714	0	580
NechaP47982	812|PHI:812|MGG_10702|EDJ94108|318829|Magnaporthe	34.53	333	209	7	15	344	46	372	6e-59	197
NechaP48126	1420|PHI:1420|GzC2H088|I1S172|5518|Gibberella	22.15	447	299	15	37	447	204	637	7e-15	75.5
NechaP71531	3243	53.05	213	91	4	7	217	3	208	2e-77	233
NechaP84461	2321|PHI:2321|SidI|Q4WR83|746128|Aspergillus	20.71	565	379	16	76	609	62	588	3e-20	92.4
NechaP95992	2968|PHI:2968|Hxs1|J9VQA5|5207|Cryptococcus	26.29	502	337	11	10	499	10	490	1e-41	154
NechaP63271	226|PHI:226|PEX6|AAK16738|5462|Colletotrichum	30.18	169	79	7	258	407	1022	1170	8e-10	58.9
NechaP84468	2385|PHI:2385|MYT2|I1RTN5|5518|Gibberella	75.73	342	59	9	1	337	1	323	9e-162	457
NechaP48173	181|PHI:181|PGX1|AAK81847|5507|Fusarium	34.46	415	245	8	42	440	47	450	1e-76	248
NechaP101489	199|PHI:199|AOX1|AAF82788|5499|Cladosporium	77.44	665	149	1	11	675	2	665	0	1101
NechaP84484	2256|PHI:2256|Xdh1|Q0UA24|13684|Phaeosphaeria	24.28	346	234	13	1	337	1	327	3e-07	49.3
NechaP105211	1890|PHI:1890|GzZC205|I1RTH7|5518|Gibberella	54.57	854	322	15	1	797	1	845	0	865
NechaP48110	2654|PHI:2654|DUR1,2|Q59VF3|5476|Candida	31.47	197	129	3	76	271	69	260	3e-15	77
NechaP96010	1861|PHI:1861|GzZC176|I1RUV3|5518|Gibberella	65.98	438	129	3	1	434	1	422	0	605
NechaP48162	2514|PHI:2514|PFS2|Q4X1Y0|746128|Aspergillus	24.63	203	119	8	219	417	82	254	5e-07	49.3
NechaP71563	2089|PHI:2089|Moatg28|MGG_08061|148305|Magnaporthe	37.8	656	339	16	10	629	22	644	1e-113	355
NechaP71566	3134	44.28	481	249	8	32	511	2	464	6e-120	363
NechaP48247	3381	37.9	467	270	5	118	581	190	639	1e-89	292
NechaP84500	1766|PHI:1766|GzZC081|I1S160|5518|Gibberella	40.98	61	27	2	3	54	10	70	7e-08	48.9
NechaP96018	1245|PHI:1245|FGSG_01559|I1RTL1|5518|Gibberella	69.62	744	166	9	1	690	1	738	0	989
NechaP96020	2099|PHI:2099|Pmc1|MGG_07971|148305|Magnaporthe	56.14	1263	456	19	49	1227	29	1277	0	1325
NechaP71570	1323|PHI:1323|GzbZIP005|I1RGR6|5518|Gibberella	28.21	397	173	13	27	414	19	312	1e-18	84.3
NechaP96021	2042|PHI:2042|ABC3|Q3Y5V5|148305|Magnaporthe	30.17	580	359	14	807	1367	764	1316	6e-58	217
NechaP96021	2042|PHI:2042|ABC3|Q3Y5V5|148305|Magnaporthe	29.78	507	320	11	112	592	121	617	5e-48	185
NechaP96021	2042|PHI:2042|ABC3|Q3Y5V5|148305|Magnaporthe	26.65	484	330	12	116	584	825	1298	2e-46	180
NechaP96021	2042|PHI:2042|ABC3|Q3Y5V5|148305|Magnaporthe	28.51	484	303	10	932	1387	188	656	2e-39	157
NechaP48304	511|PHI:511|CaNAG4|EAK93098|5476|Candida	25.42	590	341	16	19	598	73	573	4e-44	164
NechaP96028	2336|PHI:2336|NIA1|O00101|13684|Stagonospora	31.94	432	230	15	187	588	82	479	2e-40	155
NechaP96028	2336|PHI:2336|NIA1|O00101|13684|Stagonospora	33.7	92	55	4	90	178	540	628	7e-07	49.7
NechaP48041	2405|PHI:2405|MoSSK1|G5EH08|148305|Magnaporthe	33.77	154	69	4	1106	1228	627	778	2e-17	85.5
NechaP48349	144|PHI:144|CHT42|AAC05829|29875|Trichoderma	23.14	255	157	6	36	259	52	298	7e-13	67
NechaP47947	441|PHI:441|BTP1|CAE55153|40559|Botrytis	25.13	386	251	13	15	375	14	386	2e-22	95.5
NechaP48632	2570|PHI:2570|CYB2|Q6FM61|5478|Candida	37.47	475	264	12	7	450	90	562	3e-90	287
NechaP106355	3417	60.31	980	375	9	22	989	26	1003	0	1191
NechaP63344	317|PHI:317|RHBA|AAN17787|5085|Aspergillus	71.66	187	52	1	1	186	1	187	8e-100	288
NechaP71620	1648|PHI:1648|GzWing020|I1RWP1|5518|Gibberella	38.36	769	406	20	19	779	133	841	2e-142	485
NechaP49472	2100|PHI:2100|Spf1|MGG_12005|148305|Magnaporthe	30.29	746	430	24	346	1054	186	878	4e-81	290
NechaP49472	2100|PHI:2100|Spf1|MGG_12005|148305|Magnaporthe	25.3	249	168	8	1053	1293	1012	1250	1e-12	69.7
NechaP63362	2643|PHI:2643|CFAS|A4HTK3|5671|Leishmania	33.67	199	111	7	66	248	201	394	6e-27	108
NechaP96061	1504|PHI:1504|GzHMG036|I1S8H2|5518|Gibberella	39.38	193	94	5	592	780	3	176	4e-14	72
NechaP96071	2205|PHI:2205|JmjC	32	125	62	5	182	296	407	518	3e-09	55.1
NechaP84575	1548|PHI:1548|GzMyb012|I1RTE5|5518|Gibberella	37.01	408	217	11	87	470	50	441	5e-49	174
NechaP49470	2825|PHI:2825|SET1|Q5ABG1|5476|Candida	55.4	287	106	5	998	1281	773	1040	2e-85	299
NechaP49470	2825|PHI:2825|SET1|Q5ABG1|5476|Candida	22.02	336	214	13	243	553	180	492	3e-10	62
NechaP102806	213|PHI:213|CPA1|AAF69795|5207|Cryptococcus	63.12	160	58	1	37	196	4	162	2e-66	202
NechaP63391	1645|PHI:1645|GzWing017|I1RTD1|5518|Gibberella	86.37	851	97	9	1	841	1	842	0	1488
NechaP101538	1424|PHI:1424|GzC2H092|I1S3J7|5518|Gibberella	63.55	107	39	0	454	560	604	710	8e-32	129
NechaP71668	1232|PHI:1232|FGSG_03499|I1RTC2|5518|Gibberella	92.25	413	31	1	1	413	1	412	0	793
NechaP49563	3389	53.75	506	194	4	11	481	6	506	0	521
NechaP49316	1644|PHI:1644|GzRFX1|I1RTB9|5518|Gibberella	70.01	757	215	9	11	760	2	753	0	1092
NechaP84604	2350|PHI:2350|MID1|I1RTB7|5518|Gibberella	57.84	631	246	9	1	624	1	618	0	736
NechaP84607	1321|PHI:1321|ZEB2|I1RFC6|5518|Gibberella	50	44	22	0	126	169	14	57	1e-06	46.6
NechaP106359	1552|PHI:1552|GzMyb016|I1S0N5|5518|Gibberella	26.69	281	152	9	164	434	202	438	2e-16	82
NechaP106359	1552|PHI:1552|GzMyb016|I1S0N5|5518|Gibberella	30.41	148	89	5	1052	1190	490	632	5e-08	55.1
NechaP63411	1492|PHI:1492|GzHMG024|Q4I5U9|5518|Gibberella	90.75	400	37	0	1	400	1	400	0	759
NechaP48705	3174	53.29	471	155	11	33	465	35	478	3e-142	418
NechaP71682	2109|PHI:2109|CNB|MGG_06933|148305|Magnaporthe	94.25	174	10	0	1	174	1	174	4e-116	328
NechaP71693	1388|PHI:1388|GzC2H051|I1RT91|5518|Gibberella	81.66	338	61	1	1	338	1	337	0	576
NechaP96108	2969|PHI:2969|argEF|Q4WCZ1|746128|Aspergillus	64.96	371	123	3	15	383	539	904	0	528
NechaP84642	1579|PHI:1579|GzOB019|I1RM25|5518|Gibberella	38.81	67	38	1	148	211	773	839	1e-09	54.7
NechaP49575	2625|PHI:2625|purA|P65882|90371|Salmonella	38.5	413	248	4	1	409	17	427	5e-99	303
NechaP49344	1287|PHI:1287|FGSG_13944|I1RT82|5518|Gibberella	86.7	451	59	1	1	450	1	451	0	813
NechaP71701	2244|PHI:2244|37865|gi|46099354|5270|Ustilago	36.75	351	215	4	25	372	8	354	1e-77	244
NechaP101559	2020|PHI:2020|Tup1|XP_759427|5270|Ustilago	24.75	295	193	5	290	557	406	698	4e-27	115
NechaP101559	2020|PHI:2020|Tup1|XP_759427|5270|Ustilago	26.2	271	167	6	257	500	461	725	7e-16	79.3
NechaP101559	2020|PHI:2020|Tup1|XP_759427|5270|Ustilago	19.61	357	226	8	90	420	410	731	6e-10	60.1
NechaP48978	3096	79.9	393	79	0	1	393	1	393	0	681
NechaP48582	2601|PHI:2601|Asc1|P83774|746128|Aspergillus	28.15	238	143	8	11	242	13	228	2e-14	70.5
NechaP48582	2601|PHI:2601|Asc1|P83774|746128|Aspergillus	21.3	277	143	10	7	233	58	309	7e-07	47.8
NechaP71721	1918|PHI:1918|GzZC233|I1RT69|5518|Gibberella	79.06	893	175	8	63	952	1	884	0	1439
NechaP71723	2734|PHI:2734|	27.81	302	182	11	18	313	8	279	1e-26	108
NechaP96130	2038|PHI:2038|Mir1|MGG_02370|148305|Magnaporthe	27.86	280	169	10	342	605	17	279	1e-11	63.5
NechaP105272	338|PHI:338|CLB2|AAP94020|5270|Ustilago	46.9	258	135	2	342	598	322	578	1e-78	262
NechaP105273	1915|PHI:1915|GzZC230|I1RSL0|5518|Gibberella	82.71	642	106	4	1	640	1	639	0	1019
NechaP48950	812|PHI:812|MGG_10702|EDJ94108|318829|Magnaporthe	31.94	360	233	5	3	358	20	371	9e-55	187
NechaP48436	404|PHI:404|PTH11|AAD30436|318829|Magnaporthe	24.35	271	195	4	11	281	105	365	3e-20	90.1
NechaP105275	819|PHI:819|MGG_07061|EDK03750|318829|Magnaporthe	39.42	591	310	14	5	574	104	667	1e-130	398
NechaP49386	1579|PHI:1579|GzOB019|I1RM25|5518|Gibberella	30.74	771	409	20	525	1266	457	1131	5e-91	319
NechaP49453	465|PHI:465|KIN2|AAB63337|5270|Ustilago	40.63	315	155	7	64	372	52	340	4e-61	215
NechaP106365	180|PHI:180|PELD|AAC49420|140110|Nectria	61.71	222	75	5	1	217	17	233	4e-87	258
NechaP84686	3485	56.73	208	69	4	255	441	17	224	2e-65	210
NechaP101578	2519|PHI:2519|LYS9|Q4WQ27|746128|Aspergillus	72.42	446	123	0	1	446	5	450	0	679
NechaP96150	1393|PHI:1393|GzC2H056|I1RU69|5518|Gibberella	23.21	280	142	10	189	466	571	779	3e-10	60.8
NechaP84694	1610|PHI:1610|GzP53L003|I1RSN1|5518|Gibberella	84.33	651	97	3	1	649	1	648	0	1111
NechaP84700	3257	32.96	270	164	7	22	286	140	397	2e-18	83.6
NechaP101582	2067|PHI:2067|ABC4|MGG_00937|148305|Magnaporthe	29.12	182	108	5	41	214	507	675	4e-09	55.1
NechaP101582	2067|PHI:2067|ABC4|MGG_00937|148305|Magnaporthe	28.36	201	129	7	10	200	1289	1484	7e-07	47.8
NechaP49229	2020|PHI:2020|Tup1|XP_759427|5270|Ustilago	23.28	189	119	4	341	504	507	694	9e-10	58.9
NechaP49229	2020|PHI:2020|Tup1|XP_759427|5270|Ustilago	23.96	288	169	7	342	614	466	718	5e-08	53.1
NechaP105287	893|PHI:893|MGG_02986|EDK01543|318829|Magnaporthe	29.57	646	399	16	359	964	935	1564	6e-72	260
NechaP1518	1798|PHI:1798|GzZC113|I1RSP9|5518|Gibberella	72.09	627	161	1	8	620	211	837	0	947
NechaP71780	2644|PHI:2644|thioredoxin	41.25	80	45	1	22	101	5	82	8e-16	71.2
NechaP71780	2644|PHI:2644|thioredoxin	28.09	89	59	3	138	225	1	85	5e-07	45.8
NechaP49493	3028	23.66	558	256	18	36	592	22	410	3e-20	91.3
NechaP105293	2930|PHI:2930|ctf2|J9MFF7|59765|Fusarium	86.79	893	100	6	1	882	1	886	0	1577
NechaP49195	1796|PHI:1796|GzZC111|I1RSR7|5518|Gibberella	76.48	761	162	4	1	757	1	748	0	1228
NechaP84742	1685|PHI:1685|GzRad003|I1S5Z3|5518|Gibberella	27.45	204	132	7	34	229	241	436	3e-09	55.8
NechaP96188	2266|PHI:2266|Ptr2|0|13684|Phaeosphaeria	40.31	583	318	9	23	603	44	598	2e-138	419
NechaP71809	831|PHI:831|ERG2|CAA80454|318829|Magnaporthe	71.23	219	61	1	8	224	3	221	1e-115	331
NechaP49206	881|PHI:881|MGG_04556|EDJ96020|318829|Magnaporthe	33.19	229	133	6	10	238	6	214	5e-30	116
NechaP96196	1606|PHI:1606|GzOB047|I1S8E2|5518|Gibberella	87.5	208	26	0	1	208	1	208	5e-135	379
NechaP63546	267|PHI:267|MLT1|AAD51594|5476|Candida	31.28	1448	783	37	9	1322	234	1603	0	604
NechaP71824	1200|PHI:1200|(Gsk3)|I1RT36|5518|Gibberella	97.72	394	9	0	1	394	1	394	0	803
NechaP63560	2525|PHI:2525|TOM40|Q4WDL0|746128|Aspergillus	58.45	349	138	4	10	352	7	354	1e-147	423
NechaP48873	211|PHI:211|CaTUP1|AAB63195|5476|Candida	23.66	279	173	11	164	429	207	458	8e-08	52.8
NechaP48671	1433|PHI:1433|GzC2H102|I1S8E5|5518|Gibberella	75.31	324	72	1	180	503	1	316	4e-180	509
NechaP71843	2038|PHI:2038|Mir1|MGG_02370|148305|Magnaporthe	25.57	305	199	10	59	355	15	299	1e-09	56.2
NechaP71843	2038|PHI:2038|Mir1|MGG_02370|148305|Magnaporthe	26.44	208	130	6	153	351	3	196	4e-09	54.7
NechaP48922	1216|PHI:1216|FGSG_06420|I1RT48|5518|Gibberella	86.22	646	66	5	1	624	1	645	0	1159
NechaP96216	334|PHI:334|CGB1|AAO25585|5016|Cochliobolus	23.08	273	161	9	136	403	122	350	1e-09	57
NechaP71862	1566|PHI:1566|GzOB006|I1RC95|5518|Gibberella	36.96	257	157	3	397	652	124	376	2e-48	176
NechaP71868	2834|PHI:2834|LAM1|C3PTB1|5016|Cochliobolus	28.48	158	100	6	168	317	4	156	2e-09	55.8
NechaP49051	1509|PHI:1509|GzHOME004|I1RRS5|5518|Gibberella	66.08	454	133	8	1	441	1	446	0	522
NechaP96223	1816|PHI:1816|GzZC131|I1RRS3|5518|Gibberella	84.38	896	118	6	1	879	1	891	0	1479
NechaP63603	1457|PHI:1457|GzAra005|I1RRR9|5518|Gibberella	82.89	561	95	1	1	561	1	560	0	962
NechaP71876	1458|PHI:1458|GzAra006|Q4I7F9|5518|Gibberella	33.99	456	267	8	181	611	272	718	9e-78	263
NechaP96228	2020|PHI:2020|Tup1|XP_759427|5270|Ustilago	30	170	94	5	240	388	558	723	8e-12	65.1
NechaP96228	2020|PHI:2020|Tup1|XP_759427|5270|Ustilago	24.86	177	108	3	240	407	466	626	3e-09	57
NechaP96228	2020|PHI:2020|Tup1|XP_759427|5270|Ustilago	25.78	128	87	3	236	357	415	540	5e-08	53.1
NechaP96228	2020|PHI:2020|Tup1|XP_759427|5270|Ustilago	21.12	251	162	5	233	474	501	724	2e-07	51.6
NechaP122819	2601|PHI:2601|Asc1|P83774|746128|Aspergillus	30.17	232	137	9	157	387	13	220	1e-15	75.1
NechaP48520	1211|PHI:1211|FGSG_06970|I1RRQ8|5518|Gibberella	87.58	322	40	0	1	322	368	689	0	605
NechaP96240	2020|PHI:2020|Tup1|XP_759427|5270|Ustilago	24.76	307	170	9	423	713	463	724	8e-18	85.5
NechaP96240	2020|PHI:2020|Tup1|XP_759427|5270|Ustilago	25.89	197	119	5	540	730	466	641	5e-17	83.2
NechaP96240	2020|PHI:2020|Tup1|XP_759427|5270|Ustilago	24.16	269	180	7	198	457	478	731	8e-14	72.8
NechaP96240	2020|PHI:2020|Tup1|XP_759427|5270|Ustilago	23.04	230	140	5	25	253	432	625	1e-09	59.3
NechaP96240	2020|PHI:2020|Tup1|XP_759427|5270|Ustilago	23.32	373	208	14	262	621	418	725	4e-09	57.8
NechaP96242	1574|PHI:1574|GzOB014|I1RFX8|5518|Gibberella	37.18	616	328	12	44	631	221	805	4e-105	341
NechaP84827	404|PHI:404|PTH11|AAD30436|318829|Magnaporthe	26.98	215	142	6	46	257	192	394	5e-16	76.3
NechaP48452	716|PHI:716|ZEB1|ABB90284|5518|Fusarium	36.23	552	325	10	96	642	27	556	3e-104	329
NechaP20376	1488|PHI:1488|GzHMG020|I1RSA6|5518|Gibberella	60.53	1315	404	30	1	1257	1	1258	0	1358
NechaP49136	2322|PHI:2322|SidH|Q4WF54|746128|Aspergillus	25	332	158	14	46	371	24	270	6e-10	57.4
NechaP71907	862|PHI:862|ClaSSD1|BAE66713|5462|Colletotrichum	83.04	955	161	1	137	1091	3	956	0	1556
NechaP71913	3411	30	270	167	4	226	495	147	394	4e-29	117
NechaP84858	1227|PHI:1227|FGSG_07742|I1RPV7|5518|Gibberella	90.51	3887	351	8	1	3876	1	3880	0	7323
NechaP48539	121|PHI:121|PTH3|AAB88888|318829|Magnaporthe	68.69	214	66	1	8	220	5	218	1e-107	310
NechaP84867	2802|PHI:2802|3hnr|B2ZRQ4|93612|Setosphaeria	31.37	271	153	6	7	260	9	263	4e-32	118
NechaP49073	1579|PHI:1579|GzOB019|I1RM25|5518|Gibberella	41.92	260	131	4	357	615	511	751	1e-54	206
NechaP49073	1579|PHI:1579|GzOB019|I1RM25|5518|Gibberella	32.25	307	178	3	695	1000	774	1051	2e-46	179
NechaP48473	2110|PHI:2110|Serine/threonine-protein	86.34	527	51	1	1	506	44	570	0	972
NechaP105339	2269|PHI:2269|Mdh1|0|13684|Phaeosphaeria	44.29	280	136	5	13	289	3	265	1e-75	233
NechaP49296	792|PHI:792|MGG_09250|EDJ97946|318829|Magnaporthe	26.99	389	218	13	9	356	206	569	5e-34	130
NechaP96284	1581|PHI:1581|GzOB021|I1RPX8|5518|Gibberella	71.69	272	77	0	4	275	3	274	9e-152	427
NechaP48836	1517|PHI:1517|GzHOMEL013|I1RPZ1|5518|Gibberella	77.67	891	195	1	1	891	1	887	0	1274
NechaP96302	267|PHI:267|MLT1|AAD51594|5476|Candida	29.23	609	364	16	876	1423	998	1600	1e-62	233
NechaP96302	267|PHI:267|MLT1|AAD51594|5476|Candida	24.08	872	498	27	63	840	96	897	1e-51	197
NechaP858	1872|PHI:1872|GzZC187|I1RTU2|5518|Gibberella	46.77	62	32	1	21	81	8	69	5e-11	62.8
NechaP48605	464|PHI:464|KIN1|AAB63336|5270|Ustilago	29.59	338	168	12	101	385	310	630	4e-23	102
NechaP73875	2356|PHI:2356|MoHYR1|G4N178|148305|Magnaporthe	75.76	165	40	0	1	165	1	165	3e-97	280
NechaP63698	544|PHI:544|BCMFS1|AAF64435|332648|Botrytis	27.74	501	328	10	20	492	28	522	1e-48	176
NechaP84927	1414|PHI:1414|GzC2H081|I1RZL0|5518|Gibberella	45.05	91	45	3	2	91	18	104	1e-14	72.4
NechaP71976	1274|PHI:1274|FGSG_02488|I1RME6|5518|Gibberella	84.82	1607	233	6	4	1603	5	1607	0	2824
NechaP71983	339|PHI:339|CLPT1|CAC41973|290576|Colletotrichum	40.23	174	96	4	1	172	1	168	1e-37	130
NechaP49341	3459	30.71	407	229	16	113	518	53	407	1e-41	153
NechaP49272	2644|PHI:2644|thioredoxin	39.68	63	36	1	193	255	26	86	3e-07	47.4
NechaP63726	2097|PHI:2097|Neo1|MGG_04066|148305|Magnaporthe	74.14	1307	301	15	24	1303	26	1322	0	1927
NechaP48882	1741|PHI:1741|GzZC056|I1S780|5518|Gibberella	68.8	657	167	4	2	656	82	702	0	919
NechaP96330	2042|PHI:2042|ABC3|Q3Y5V5|148305|Magnaporthe	34.7	1317	767	14	25	1269	25	1320	0	769
NechaP48822	792|PHI:792|MGG_09250|EDJ97946|318829|Magnaporthe	41.15	401	209	9	79	464	185	573	7e-98	308
NechaP123410	4493	52.16	462	176	9	48	501	49	473	1e-159	465
NechaP96336	1675|PHI:1675|GzDHHC003|Q4I8B6|5518|Gibberella	28.15	135	80	2	3	137	22	139	2e-08	50.8
NechaP84964	479|PHI:479|MEP1|AAQ07436|199306|Coccidioides	40.38	265	133	8	6	268	8	249	4e-59	190
NechaP84965	697|PHI:697|ugt51E1|AAM81358|5022|Leptosphaeria	26.51	347	196	16	30	358	82	387	5e-23	96.7
NechaP49338	2927|PHI:2927|lip5|J9N2Z8|59765|Fusarium	31.12	482	263	15	43	487	44	493	5e-45	165
NechaP96352	1555|PHI:1555|GzMyb019|I1RDG6|5518|Gibberella	24.27	445	258	8	28	397	69	509	2e-32	125
NechaP49128	409|PHI:409|BbCHIT1|AAN41259|176275|Beauveria	22.03	227	132	8	76	265	108	326	8e-07	47.4
NechaP49539	1071|PHI:1071|Gas1|CAF05793|5270|Ustilago	40.14	974	478	18	1	888	1	955	0	750
NechaP85014	178|PHI:178|pabaA|AAD31929|5085|Aspergillus	36.3	865	464	24	3	839	14	819	9e-146	451
NechaP72032	2968|PHI:2968|Hxs1|J9VQA5|5207|Cryptococcus	27.57	526	319	13	38	528	20	518	6e-49	176
NechaP48879	2218|PHI:2218|drf1|XP_757288|5270|Ustilago	24.72	449	286	18	326	747	738	1161	9e-17	84.3
NechaP48879	2218|PHI:2218|drf1|XP_757288|5270|Ustilago	21.33	436	296	18	1112	1537	1594	1992	3e-13	72.4
NechaP85034	1640|PHI:1640|GzWing012|I1RPI0|5518|Gibberella	55.37	419	150	7	1	392	1	409	4e-139	405
NechaP85035	24|PHI:24|Avenacinase	54.9	776	325	11	45	805	26	791	0	818
NechaP85037	716|PHI:716|ZEB1|ABB90284|5518|Fusarium	36.43	560	328	10	97	652	27	562	1e-108	340
NechaP85038	404|PHI:404|PTH11|AAD30436|318829|Magnaporthe	25.95	289	179	10	40	313	114	382	8e-12	63.9
NechaP49183	1662|PHI:1662|GzCCHC002|I1REJ1|5518|Gibberella	24.66	442	308	14	33	465	648	1073	2e-27	114
NechaP85046	1969|PHI:1969|GzZC284|I1RFD7|5518|Gibberella	28.48	467	298	12	1	438	1	460	2e-45	164
NechaP48703	2309|PHI:2309|BcatrB|Q9UW03|40559|Botrytis	47.98	1388	674	14	36	1388	64	1438	0	1326
NechaP96390	1877|PHI:1877|GzZC192|I1RPI7|5518|Gibberella	77.78	405	85	4	185	588	303	703	0	655
NechaP96390	1877|PHI:1877|GzZC192|I1RPI7|5518|Gibberella	64.84	219	37	4	1	181	1	217	4e-83	275
NechaP85052	1662|PHI:1662|GzCCHC002|I1REJ1|5518|Gibberella	43.24	74	42	0	44	117	1325	1398	5e-15	69.3
NechaP49257	1555|PHI:1555|GzMyb019|I1RDG6|5518|Gibberella	26.31	498	333	13	11	481	35	525	6e-44	161
NechaP85058	211|PHI:211|CaTUP1|AAB63195|5476|Candida	29.11	213	132	8	803	999	260	469	3e-15	77.4
NechaP85058	211|PHI:211|CaTUP1|AAB63195|5476|Candida	25.4	248	151	8	689	915	280	514	6e-12	67
NechaP85058	211|PHI:211|CaTUP1|AAB63195|5476|Candida	26.27	217	133	7	707	906	257	463	9e-11	63.2
NechaP85061	2570|PHI:2570|CYB2|Q6FM61|5478|Candida	31.18	372	220	7	43	383	196	562	1e-58	201
NechaP49236	2916|PHI:2916|Ppr2|W7M5P0|117187|Fusarium	95.17	663	26	2	1	662	1	658	0	1256
NechaP85078	1430|PHI:1430|GzC2H098|I1S7L4|5518|Gibberella	49.36	233	114	3	111	341	1	231	3e-74	236
NechaP49301	1674|PHI:1674|GzDHHC002|Q4IA62|5518|Gibberella	79.13	551	98	5	3	538	2	550	0	865
NechaP85080	1026|PHI:1026|bcplc1|AAB39564|40559|Botrytis	48.04	1020	468	20	128	1115	1	990	0	912
NechaP96404	873|PHI:873|MGG_02443|EDJ98595|318829|Magnaporthe	48.94	521	208	12	357	844	278	773	2e-157	480
NechaP96404	873|PHI:873|MGG_02443|EDJ98595|318829|Magnaporthe	47.06	272	132	2	5	265	9	279	4e-71	249
NechaP96406	807|PHI:807|MGG_06951|EDJ98115|318829|Magnaporthe	77.78	459	97	1	410	868	61	514	0	742
NechaP63797	177|PHI:177|ODC|CAB56523|13684|Stagonospora	67.62	420	130	4	31	448	30	445	0	603
NechaP123411	1552|PHI:1552|GzMyb016|I1S0N5|5518|Gibberella	23.01	591	295	20	456	1030	174	620	1e-33	137
NechaP85090	890|PHI:890|MGG_07015|EDJ98043|318829|Magnaporthe	45.96	594	301	10	45	631	28	608	1e-179	525
NechaP49364	2924|PHI:2924|lip1|J9MXG1|59765|Fusarium	64.55	347	119	2	1	347	1	343	5e-167	471
NechaP96416	2542|PHI:2542|ERG12|Q4WP25|746128|Aspergillus	69.89	465	137	2	32	496	75	536	0	671
NechaP48911	2968|PHI:2968|Hxs1|J9VQA5|5207|Cryptococcus	27.74	393	264	10	14	400	82	460	8e-41	150
NechaP49581	1704|PHI:1704|GzZC019|I1RPF7|5518|Gibberella	74.95	543	134	2	91	633	84	624	0	829
NechaP96422	24|PHI:24|Avenacinase	25.45	715	409	24	542	1166	106	786	3e-30	126
NechaP85112	1878|PHI:1878|GzZC193|I1RPF6|5518|Gibberella	83.62	769	125	1	1	769	1	768	0	1365
NechaP2073	1326|PHI:1326|GzbZIP008|I1RPG1|5518|Gibberella	79.3	541	97	7	1	533	77	610	0	756
NechaP49243	1621|PHI:1621|GzRUM1|I1RP98|5518|Gibberella	81.91	1669	285	13	1	1666	1	1655	0	2774
NechaP96435	1375|PHI:1375|GzC2H038|I1RPA0|5518|Gibberella	85.71	504	66	4	1	500	1	502	0	874
NechaP49375	423|PHI:423|VAD1|AAV41010|5207|Cryptococcus	41.69	367	210	4	34	399	38	401	6e-88	280
NechaP85140	1161|PHI:1161|MgMfs1|A4ZGP3|54734|Mycosphaerella	28.52	533	359	11	1	522	41	562	3e-49	177
NechaP48735	2322|PHI:2322|SidH|Q4WF54|746128|Aspergillus	50.92	271	125	3	10	279	7	270	4e-94	280
NechaP48919	1795|PHI:1795|GzZC110|I1RSX8|5518|Gibberella	24.44	405	251	13	13	365	14	415	5e-17	81.6
NechaP85150	438|PHI:438|BcBOT1	28.72	484	329	8	18	496	19	491	2e-65	221
NechaP3212	144|PHI:144|CHT42|AAC05829|29875|Trichoderma	22.02	336	219	10	80	379	57	385	5e-14	70.5
NechaP48733	2978|PHI:2978|MoCel12A|G4N5V2|148305|Magnaporthe	34.5	258	154	8	6	250	8	263	1e-35	127
NechaP85172	2968|PHI:2968|Hxs1|J9VQA5|5207|Cryptococcus	25.85	472	322	14	5	461	3	461	3e-30	120
NechaP85173	2989|PHI:2989|MGG_06243.6|G4N8I4|148305|Magnaporthe	23.15	216	146	7	229	441	336	534	2e-08	55.5
NechaP85176	784|PHI:784|MGG_00056|EDK03390|318829|Magnaporthe	31.25	256	154	9	2	243	14	261	3e-21	87.8
NechaP85177	784|PHI:784|MGG_00056|EDK03390|318829|Magnaporthe	32.58	267	163	7	5	259	14	275	2e-25	100
NechaP96455	2393|PHI:2393|Related	32.3	322	196	8	159	469	144	454	4e-41	152
NechaP101741	513|PHI:513|ARN1	40.85	585	331	8	7	582	8	586	1e-151	451
NechaP85184	427|PHI:427|TPK1|EAL04880|5476|Candida	25.97	181	110	5	549	723	169	331	1e-08	55.1
NechaP101743	334|PHI:334|CGB1|AAO25585|5016|Cochliobolus	27.01	274	151	6	32	259	80	350	2e-20	90.9
NechaP72103	1226|PHI:1226|FGSG_11614|I1RP88|5518|Gibberella	90.24	635	52	7	1	630	1	630	0	1175
NechaP101746	2270|PHI:2270|Mpd1|Q0U6E8|13684|Phaeosphaeria	56.56	389	165	3	3	390	5	390	3e-150	432
NechaP85194	1884|PHI:1884|GzZC199|I1RJ58|5518|Gibberella	29.6	125	68	3	239	349	428	546	3e-08	52.8
NechaP85203	3301	33.09	136	83	3	140	271	128	259	3e-16	73.6
NechaP48581	881|PHI:881|MGG_04556|EDJ96020|318829|Magnaporthe	24.36	234	138	6	1	211	1	218	3e-10	58.2
NechaP85205	1941|PHI:1941|GzZC256|I1RGD9|5518|Gibberella	25.44	401	247	12	185	563	305	675	2e-24	105
NechaP85213	2032|PHI:2032|VTL1|G4NGA7|148305|Magnaporthe	27.35	479	294	17	119	580	95	536	2e-26	111
NechaP85215	441|PHI:441|BTP1|CAE55153|40559|Botrytis	22.47	396	252	9	14	380	10	379	3e-19	86.3
NechaP85217	812|PHI:812|MGG_10702|EDJ94108|318829|Magnaporthe	26.17	321	223	9	25	339	60	372	2e-16	77.8
NechaP96471	1393|PHI:1393|GzC2H056|I1RU69|5518|Gibberella	31.99	722	462	12	14	721	73	779	5e-133	413
NechaP101748	2968|PHI:2968|Hxs1|J9VQA5|5207|Cryptococcus	24.95	549	359	13	1	527	1	518	5e-44	162
NechaP85225	2191|PHI:2191|MoCYP51B	23.33	360	229	16	147	482	165	501	9e-11	61.2
NechaP96476	2378|PHI:2378|DEP4|D2E9W9|29001|Alternaria	27.47	586	342	14	1	536	1	553	8e-53	188
NechaP49045	2034|PHI:2034|MFP1|G4MZY1|148305|Magnaporthe	29.38	177	120	3	5	179	315	488	4e-14	69.7
NechaP49045	2034|PHI:2034|MFP1|G4MZY1|148305|Magnaporthe	34.17	120	79	0	60	179	75	194	5e-14	69.3
NechaP48689	543|PHI:543|BCATRD|CAC41639|40559|Botrytis	53.79	1426	639	8	4	1417	60	1477	0	1604
NechaP48689	543|PHI:543|BCATRD|CAC41639|40559|Botrytis	21.59	667	432	20	803	1419	166	791	2e-18	89.4
NechaP85240	1816|PHI:1816|GzZC131|I1RRS3|5518|Gibberella	20.94	363	242	10	338	663	385	739	6e-11	63.2
NechaP96482	1662|PHI:1662|GzCCHC002|I1REJ1|5518|Gibberella	25.66	456	269	14	15	415	609	1049	1e-30	124
NechaP106390	4619	36.11	360	202	11	16	353	18	371	2e-61	208
NechaP63845	903|PHI:903|um01888||5270|Ustilago	44.49	535	286	7	5	537	9	534	1e-159	470
NechaP96488	2315|PHI:2315|ChLae1|G4XKY9|5016|Cochliobolus	37.8	291	173	7	28	311	2	291	1e-56	185
NechaP85261	143|PHI:143|CHT|AAA33353|5563|Gloeocercospora	75.07	365	89	1	1	363	1	365	0	575
NechaP85265	1047|PHI:1047|CTB6|ABK64183|29003|Cercospora	38.64	132	75	5	9	134	6	137	7e-16	75.1
NechaP85266	2175|PHI:2175|NMR3|MGG_09705|148305|Magnaporthe	37.06	313	174	9	5	299	9	316	2e-59	193
NechaP85267	1872|PHI:1872|GzZC187|I1RTU2|5518|Gibberella	35.18	253	146	5	98	343	127	368	4e-40	147
NechaP49457	2654|PHI:2654|DUR1,2|Q59VF3|5476|Candida	28.09	235	123	6	117	351	55	243	2e-09	57.4
NechaP96496	2968|PHI:2968|Hxs1|J9VQA5|5207|Cryptococcus	33.68	478	295	5	14	488	5	463	1e-90	288
NechaP85272	1959|PHI:1959|GzZC274|I1RM85|5518|Gibberella	26.06	495	305	13	3	469	27	488	8e-39	147
NechaP85274	1959|PHI:1959|GzZC274|I1RM85|5518|Gibberella	26.41	462	266	12	18	431	22	457	7e-30	119
NechaP85276	2240|PHI:2240|Srt1|Q4PBY9|5270|Ustilago	27.32	421	280	6	58	469	89	492	2e-37	142
NechaP101753	697|PHI:697|ugt51E1|AAM81358|5022|Leptosphaeria	29.81	322	185	11	87	388	96	396	2e-26	106
NechaP48908	157|PHI:157|TOXF|AAD45321|5017|Cochliobolus	31.33	166	109	3	55	219	36	197	1e-15	74.7
NechaP2617	1713|PHI:1713|GzZC028|I1RGG4|5518|Gibberella	44.75	467	239	3	10	476	89	536	6e-133	399
NechaP85286	191|PHI:191|TOM1|AAB08446|39703|Septoria	28.73	268	139	7	73	288	524	791	6e-23	97.4
NechaP26479	404|PHI:404|PTH11|AAD30436|318829|Magnaporthe	23.18	371	242	15	21	368	106	456	2e-18	84.3
NechaP46230	55|PHI:55|PKS1|AAB08104|5016|Cochliobolus	32.98	2617	1569	60	14	2553	14	2522	0	1141
NechaP83233	1046|PHI:1046|CTB5|ABK64182|29003|Cercospora	25.59	383	257	14	21	384	83	456	2e-23	99
NechaP83234	1841|PHI:1841|GzZC156|I1RIY6|5518|Gibberella	26.22	389	262	11	192	568	187	562	1e-26	112
NechaP83236	1555|PHI:1555|GzMyb019|I1RDG6|5518|Gibberella	26.92	494	304	11	30	489	73	543	2e-44	162
NechaP83240	468|PHI:468|EPA1|AAQ82691|5478|Candida	31.76	148	70	7	156	290	118	247	4e-09	55.1
NechaP83242	1729|PHI:1729|GzZC044|I1S5H3|5518|Gibberella	25.81	399	244	10	40	427	92	449	2e-16	79
NechaP46176	3630	32.95	352	215	5	122	466	121	458	4e-52	193
NechaP83245	1991|PHI:1991|GzZC306|I1R9K1|5518|Gibberella	29.73	148	78	4	13	152	14	143	3e-12	67
NechaP83250	3102	42.82	418	218	8	37	445	56	461	7e-109	331
NechaP45920	358|PHI:358|ILV2|AAR29084|5207|Cryptococcus	56.19	598	239	8	1	585	119	706	0	664
NechaP83253	1713|PHI:1713|GzZC028|I1RGG4|5518|Gibberella	31.92	639	364	18	6	620	20	611	3e-86	282
NechaP83258	2247|PHI:2247|Sch1|EAT82552|13684|Phaeosphaeria	28.47	288	167	8	7	278	18	282	4e-21	88.6
NechaP46257	4194	28.48	474	301	17	17	470	20	475	1e-40	151
NechaP45940	2378|PHI:2378|DEP4|D2E9W9|29001|Alternaria	21.28	376	249	15	41	391	6	359	2e-10	60.8
NechaP46417	225|PHI:225|PEP5|AAK16922|140110|Nectria	36.93	241	108	5	155	353	6	244	1e-33	125
NechaP83264	2393|PHI:2393|Related	26.22	431	266	12	75	460	12	435	2e-34	131
NechaP28119	2034|PHI:2034|MFP1|G4MZY1|148305|Magnaporthe	32.41	216	127	8	4	212	316	519	6e-20	86.3
NechaP28119	2034|PHI:2034|MFP1|G4MZY1|148305|Magnaporthe	31.55	168	87	7	55	212	76	225	1e-11	60.8
NechaP83268	1723|PHI:1723|GzZC038|I1S832|5518|Gibberella	25.62	847	584	17	73	898	72	893	4e-70	248
NechaP46366	3457	22.04	481	297	17	95	549	84	512	1e-07	51.2
NechaP83273	413|PHI:413|MPD1|AAT84078|13684|Stagonospora	26.85	391	229	11	14	369	9	377	2e-23	99.4
NechaP45955	1851|PHI:1851|GzZC166|I1RXJ3|5518|Gibberella	65.32	666	188	12	1	666	1	623	0	801
NechaP46422	4194	26.04	480	327	14	22	491	14	475	1e-31	125
NechaP83276	404|PHI:404|PTH11|AAD30436|318829|Magnaporthe	25.6	293	194	6	19	298	120	401	4e-18	83.6
NechaP46276	1821|PHI:1821|GzZC136|I1RWY8|5518|Gibberella	53.47	303	133	3	95	395	137	433	6e-104	325
NechaP45922	2240|PHI:2240|Srt1|Q4PBY9|5270|Ustilago	27.21	463	319	7	1	456	46	497	7e-40	149
NechaP83287	1762|PHI:1762|GzZC077|I1RXJ4|5518|Gibberella	73.46	584	146	6	8	582	69	652	0	875
NechaP46209	2968|PHI:2968|Hxs1|J9VQA5|5207|Cryptococcus	30.18	487	305	10	41	521	6	463	9e-65	220
NechaP104938	2240|PHI:2240|Srt1|Q4PBY9|5270|Ustilago	25.55	501	355	8	27	516	23	516	8e-44	161
NechaP101164	1850|PHI:1850|GzZC165|I1RXK9|5518|Gibberella	61.3	509	182	6	1	497	1	506	0	649
NechaP46346	144|PHI:144|CHT42|AAC05829|29875|Trichoderma	27.08	384	205	11	40	394	53	390	4e-28	112
NechaP83299	1681|PHI:1681|GzNF001|I1REN7|5518|Gibberella	22.88	354	203	11	669	996	738	1047	2e-08	55.8
NechaP95238	1513|PHI:1513|GzHOME011|I1RXH8|5518|Gibberella	77.27	726	133	6	18	734	69	771	0	1122
NechaP70787	2248|PHI:2248|Als1|Q1L2E2|13684|Phaeosphaeria	28.57	378	227	12	34	387	188	546	8e-32	124
NechaP62526	447|PHI:447|MCSA|CAI61947|5085|Aspergillus	28.85	364	207	15	105	443	122	458	7e-27	110
NechaP95243	419|PHI:419|CSH1|AAP93915|5476|Candida	26.27	316	196	7	11	292	1	313	8e-25	100
NechaP83333	538|PHI:538|FRT1|AAU87358|40559|Botrytis	25.49	463	320	14	17	470	104	550	2e-26	110
NechaP28041	2034|PHI:2034|MFP1|G4MZY1|148305|Magnaporthe	25.58	215	139	6	5	212	315	515	3e-10	57.4
NechaP83339	1775|PHI:1775|GzZC090|I1S5X3|5518|Gibberella	25.25	408	256	14	3	387	7	388	1e-21	93.2
NechaP46003	2654|PHI:2654|DUR1,2|Q59VF3|5476|Candida	34.62	156	91	4	182	335	69	215	1e-11	65.1
NechaP46071	513|PHI:513|ARN1	26.44	556	380	12	15	569	58	585	1e-51	186
NechaP83345	2731|PHI:2731|VdSge1|G2XD29|27337|Verticillium	26.52	528	342	14	78	580	31	537	6e-41	154
NechaP46156	1512|PHI:1512|GzHOME010|I1RXH4|5518|Gibberella	78.36	536	79	8	22	556	3	502	0	810
NechaP46322	3391	27.11	166	103	6	3	151	77	241	6e-10	57.4
NechaP46258	2550|PHI:2550|NOB1|Q4WES1|746128|Aspergillus	48.53	441	204	8	3	429	4	435	4e-128	379
NechaP46268	2522|PHI:2522|SPE2|Q4WEN8|746128|Aspergillus	57.7	513	172	14	6	498	6	493	0	550
NechaP101171	1999|PHI:1999|GzZC314|I1R9E5|5518|Gibberella	26.73	591	323	25	12	514	23	591	2e-34	137
NechaP46300	716|PHI:716|ZEB1|ABB90284|5518|Fusarium	26.1	249	148	12	234	472	72	294	5e-07	50.8
NechaP46412	697|PHI:697|ugt51E1|AAM81358|5022|Leptosphaeria	30.32	409	217	19	3	399	45	397	5e-33	126
NechaP83371	1355|PHI:1355|GzC2H015|I1RD84|5518|Gibberella	48.46	357	153	13	5	335	3	354	5e-92	281
NechaP46442	1824|PHI:1824|GzZC139|I1RYC6|5518|Gibberella	42.88	583	293	13	162	712	5	579	3e-149	449
NechaP45960	2279|PHI:2279|Conserved	27.86	262	149	9	35	272	17	262	8e-27	104
NechaP83376	3028	25.13	195	137	5	50	238	78	269	2e-11	62.4
NechaP95267	3381	26.96	497	315	12	402	877	170	639	2e-33	134
NechaP6871	441|PHI:441|BTP1|CAE55153|40559|Botrytis	28.09	178	120	3	64	236	116	290	8e-16	73.9
NechaP101178	1769|PHI:1769|GzZC084|I1RXB2|5518|Gibberella	62.3	512	140	15	1	512	1	459	0	592
NechaP104949	339|PHI:339|CLPT1|CAC41973|290576|Colletotrichum	30.23	129	81	2	94	217	2	126	2e-17	75.9
NechaP101186	1535|PHI:1535|GzMADS002|I1RXD6|5518|Gibberella	78.26	437	91	2	8	442	1	435	0	718
NechaP83404	1332|PHI:1332|GzbZIP014|I1RXD5|5518|Gibberella	42.14	318	145	6	3	286	4	316	7e-66	209
NechaP45969	1596|PHI:1596|GzOB036|I1RXD4|5518|Gibberella	84.78	92	14	0	1	92	1	92	7e-51	165
NechaP46451	3067	54.11	401	172	9	46	441	34	427	5e-115	390
NechaP16667	3175	68.83	369	108	4	14	380	5	368	3e-175	495
NechaP83421	541|PHI:541|LIP1|AAU87359|332648|Botrytis	28.71	505	279	16	8	451	14	498	1e-41	155
NechaP70841	1625|PHI:1625|GzOpi|I1RXB9|5518|Gibberella	70.55	326	70	8	281	606	160	459	7e-142	421
NechaP70841	1625|PHI:1625|GzOpi|I1RXB9|5518|Gibberella	68.05	169	42	6	1	163	1	163	8e-56	195
NechaP70849	2095|PHI:2095|Calcium-transporting	73.15	1054	269	7	11	1055	16	1064	0	1566
NechaP83430	1707|PHI:1707|GzZC022|I1RJY6|5518|Gibberella	24.11	336	199	10	295	586	241	564	5e-16	79.3
NechaP46452	1435|PHI:1435|GzC2H104|I1S9G1|5518|Gibberella	47.43	681	263	18	16	653	39	667	1e-169	534
NechaP95296	2247|PHI:2247|Sch1|EAT82552|13684|Phaeosphaeria	31.75	274	175	7	7	278	17	280	4e-34	125
NechaP62595	1763|PHI:1763|GzZC078|I1RXE8|5518|Gibberella	77.97	708	144	5	3	699	5	711	0	1123
NechaP95300	362|PHI:362|LYSF|CAC48042|5085|Aspergillus	59.55	398	136	6	308	692	391	776	7e-146	446
NechaP95300	362|PHI:362|LYSF|CAC48042|5085|Aspergillus	71.49	228	63	1	76	301	73	300	5e-115	365
NechaP95301	1408|PHI:1408|GzC2H072|I1RXE9|5518|Gibberella	78.59	411	81	1	1	404	1	411	0	662
NechaP101201	267|PHI:267|MLT1|AAD51594|5476|Candida	31.09	1264	722	28	476	1664	417	1606	2e-175	573
NechaP46180	1511|PHI:1511|GzHOME009|I1RXF3|5518|Gibberella	87.54	618	60	14	1	610	1	609	0	1040
NechaP70869	405|PHI:405|PDE1|AAK07740|318829|Magnaporthe	45.4	1403	625	26	171	1476	35	1393	0	1149
NechaP95310	2185|PHI:2185|PIC1|EHA54868|148305|Magnaporthe	39.6	250	108	11	1	216	1	241	1e-30	126
NechaP23911	1609|PHI:1609|GzP53L002|I1RJ69|5518|Gibberella	33.77	530	293	11	1	505	9	505	7e-83	267
NechaP122747	1552|PHI:1552|GzMyb016|I1S0N5|5518|Gibberella	26.28	293	174	9	258	541	202	461	1e-18	88.6
NechaP122747	1552|PHI:1552|GzMyb016|I1S0N5|5518|Gibberella	29.08	141	97	2	659	798	478	616	3e-13	71.2
NechaP46227	1420|PHI:1420|GzC2H088|I1S172|5518|Gibberella	47.17	725	302	8	260	914	179	892	0	661
NechaP46227	1420|PHI:1420|GzC2H088|I1S172|5518|Gibberella	35.48	93	60	0	1	93	5	97	3e-12	67.8
NechaP46259	1662|PHI:1662|GzCCHC002|I1REJ1|5518|Gibberella	30.8	289	183	7	16	301	657	931	1e-31	127
NechaP83475	1956|PHI:1956|GzZC271|I1RLT2|5518|Gibberella	24.59	606	354	20	15	579	13	556	9e-45	168
NechaP83479	1810|PHI:1810|GzZC125|I1RUJ0|5518|Gibberella	23.19	595	342	22	2	550	5	530	4e-30	122
NechaP46056	716|PHI:716|ZEB1|ABB90284|5518|Fusarium	34.69	565	340	8	92	653	24	562	6e-108	339
NechaP83482	404|PHI:404|PTH11|AAD30436|318829|Magnaporthe	22.51	271	183	8	178	433	143	401	1e-14	73.6
NechaP46033	1893|PHI:1893|GzZC208|I1RNY0|5518|Gibberella	32.11	464	279	10	1	448	1	444	6e-70	232
NechaP70883	2654|PHI:2654|DUR1,2|Q59VF3|5476|Candida	25.88	398	236	19	110	484	61	422	4e-10	60.1
NechaP83489	199|PHI:199|AOX1|AAF82788|5499|Cladosporium	25.19	516	282	19	22	508	6	446	8e-25	106
NechaP46163	1838|PHI:1838|GzZC153|I1RGC8|5518|Gibberella	51.42	634	291	8	67	691	15	640	0	626
NechaP7144	2174|PHI:2174|NMR2|MGG_02860|148305|Magnaporthe	24	175	114	6	1	163	1	168	5e-08	49.3
NechaP46394	1047|PHI:1047|CTB6|ABK64183|29003|Cercospora	25.48	314	180	12	13	298	4	291	3e-15	73.6
NechaP83501	1984|PHI:1984|GzZC299|I1RB67|5518|Gibberella	31.92	614	331	17	2	543	12	610	2e-105	330
NechaP46260	1192|PHI:1192|(Sc	79.78	356	68	1	16	371	2	353	0	593
NechaP46398	1526|PHI:1526|GzHOMEL036|I1S0J3|5518|Gibberella	28.46	123	88	0	794	916	568	690	4e-14	73.9
NechaP95335	2196|PHI:2196|MoRgs5|XP_363151|148305|Magnaporthe	26.27	632	362	14	51	656	405	958	1e-63	225
NechaP62632	2096|PHI:2096|Calcium-transporting	46.65	1031	456	18	47	1007	23	1029	0	861
NechaP45966	3036	75.91	328	66	4	1	328	1	315	0	516
NechaP45968	2570|PHI:2570|CYB2|Q6FM61|5478|Candida	39.36	376	214	7	18	383	187	558	4e-82	264
NechaP62639	1759|PHI:1759|GzZC074|I1RXS2|5518|Gibberella	55.7	605	213	8	61	629	18	603	0	651
NechaP101221	2841|PHI:2841|CnSEC14-2|F6K8L6|5207|Cryptococcus	30.69	277	149	9	30	297	9	251	9e-25	100
NechaP46438	2032|PHI:2032|VTL1|G4NGA7|148305|Magnaporthe	52.79	519	240	3	20	536	21	536	0	578
NechaP46183	2502|PHI:2502|FgTep1p|I1RM09	78.25	570	107	4	1	570	1	553	0	917
NechaP7929	2279|PHI:2279|Conserved	36.82	239	123	7	16	233	11	242	9e-43	146
NechaP83543	1733|PHI:1733|GzZC048|I1S737|5518|Gibberella	59.83	229	73	5	1	228	75	285	4e-77	248
NechaP62655	2315|PHI:2315|ChLae1|G4XKY9|5016|Cochliobolus	37.07	294	171	7	44	326	2	292	4e-59	192
NechaP46272	2315|PHI:2315|ChLae1|G4XKY9|5016|Cochliobolus	33.56	295	181	7	64	348	3	292	2e-48	165
NechaP95357	2042|PHI:2042|ABC3|Q3Y5V5|148305|Magnaporthe	43.71	1336	636	12	21	1268	14	1321	0	1092
NechaP95357	2042|PHI:2042|ABC3|Q3Y5V5|148305|Magnaporthe	28.44	640	371	19	699	1267	9	632	7e-54	204
NechaP46191	1662|PHI:1662|GzCCHC002|I1REJ1|5518|Gibberella	31.13	408	261	6	24	418	653	1053	1e-65	229
NechaP83561	1810|PHI:1810|GzZC125|I1RUJ0|5518|Gibberella	25.97	439	262	17	9	414	16	424	4e-26	110
NechaP95362	784|PHI:784|MGG_00056|EDK03390|318829|Magnaporthe	37.23	282	154	7	4	271	2	274	4e-42	146
NechaP46888	2032|PHI:2032|VTL1|G4NGA7|148305|Magnaporthe	26.86	510	327	15	54	543	43	526	3e-52	186
NechaP95364	2329|PHI:2329|CTB4|A0ST42|29003|Cercospora	25.17	441	278	12	45	473	58	458	2e-20	92
NechaP95366	404|PHI:404|PTH11|AAD30436|318829|Magnaporthe	28.16	309	186	9	49	330	126	425	1e-23	100
NechaP95368	1955|PHI:1955|GzZC270|I1RM02|5518|Gibberella	69.22	666	195	5	139	803	103	759	0	931
NechaP95368	1955|PHI:1955|GzZC270|I1RM02|5518|Gibberella	35.64	101	21	2	7	63	1	101	1e-10	62
NechaP95372	413|PHI:413|MPD1|AAT84078|13684|Stagonospora	24.26	408	236	14	40	402	19	398	3e-19	88.6
NechaP46700	1975|PHI:1975|GzZC290|I1RQI0|5518|Gibberella	26.76	426	255	14	1	378	115	531	7e-43	156
NechaP46782	323|PHI:323|VFGLU1|AAO63562|93591|Verticillium	23.47	294	180	13	71	333	104	383	1e-09	57.4
NechaP46766	2240|PHI:2240|Srt1|Q4PBY9|5270|Ustilago	26.42	477	326	8	58	521	34	498	1e-39	149
NechaP101230	1580|PHI:1580|GzOB020|I1RM35|5518|Gibberella	87.18	390	47	3	1	387	1	390	0	615
NechaP106300	1552|PHI:1552|GzMyb016|I1S0N5|5518|Gibberella	46.81	282	127	3	101	381	175	434	2e-76	266
NechaP106300	1552|PHI:1552|GzMyb016|I1S0N5|5518|Gibberella	49.49	196	96	3	491	685	441	634	4e-48	181
NechaP95387	1458|PHI:1458|GzAra006|Q4I7F9|5518|Gibberella	30.18	381	223	7	78	420	314	689	1e-45	172
NechaP101231	1133|PHI:1133|Lmepi|B9DR51|5022|Leptosphaeria	71.31	373	104	1	1	370	1	373	0	544
NechaP83601	2895|PHI:2895|F-avi4330|B9JV05|373|Agrobacterium	30.74	231	149	4	22	244	1801	2028	5e-21	92
NechaP22088	2547|PHI:2547|ESF1|Q4WHH1|746128|Aspergillus	50.82	673	284	16	10	655	9	661	3e-161	483
NechaP83604	2315|PHI:2315|ChLae1|G4XKY9|5016|Cochliobolus	34.94	249	115	9	92	320	1	222	9e-32	119
NechaP46571	1895|PHI:1895|GzZC210|I1RNU2|5518|Gibberella	69.03	678	176	10	1	673	1	649	0	920
NechaP83618	1956|PHI:1956|GzZC271|I1RLT2|5518|Gibberella	26.73	636	379	21	14	611	12	598	3e-44	166
NechaP23989	1662|PHI:1662|GzCCHC002|I1REJ1|5518|Gibberella	27.15	431	295	10	19	445	653	1068	4e-38	147
NechaP47041	881|PHI:881|MGG_04556|EDJ96020|318829|Magnaporthe	28.85	208	135	6	27	226	22	224	3e-17	79
NechaP83627	1998|PHI:1998|GzZC313|I1R9B9|5518|Gibberella	24.41	299	170	11	8	285	5	268	3e-13	67.8
NechaP83628	1795|PHI:1795|GzZC110|I1RSX8|5518|Gibberella	22.32	475	312	14	12	471	2	434	4e-18	85.1
NechaP47054	2022|PHI:2022|BUF1|MGG_02252|148305|Magnaporthe	28.11	217	133	11	56	264	29	230	6e-10	56.6
NechaP46990	1553|PHI:1553|GzMyb017|I1S7F8|5518|Gibberella	91.71	410	33	1	1	409	1	410	0	728
NechaP46648	1662|PHI:1662|GzCCHC002|I1REJ1|5518|Gibberella	28.31	445	292	11	22	456	648	1075	4e-44	166
NechaP95418	2632|PHI:2632|argH|Q2FIB5|1280|Staphylococcus	25.79	252	156	8	44	275	53	293	3e-10	59.3
NechaP95420	4194	26.83	477	300	15	69	527	30	475	5e-37	141
NechaP46733	1924|PHI:1924|GzZC239|I1RH93|5518|Gibberella	27.35	563	326	19	28	540	96	625	1e-35	140
NechaP46498	3457	43.82	550	234	11	43	550	21	537	3e-134	408
NechaP83647	355|PHI:355|GzmetE||5518|Fusarium	84.52	504	59	3	7	494	2	502	0	868
NechaP46494	922|PHI:922|um03615||5270|Ustilago	29.39	592	310	15	36	528	83	665	1e-56	200
NechaP47160	1896|PHI:1896|GzZC211|I1RNR1|5518|Gibberella	54.33	773	331	9	1	769	16	770	0	807
NechaP70973	789|PHI:789|MGG_04116|EDJ99418|318829|Magnaporthe	70	290	82	3	912	1201	998	1282	4e-131	434
NechaP123200	1174|PHI:1174|HDF3|I1RNQ2|5518|Gibberella	61	1141	307	18	15	1040	13	1130	0	1251
NechaP46575	339|PHI:339|CLPT1|CAC41973|290576|Colletotrichum	25.71	175	104	5	6	171	4	161	5e-12	58.9
NechaP95452	469|PHI:469|TOXG|AAD47837|5017|Cochliobolus	45.81	334	180	1	40	373	29	361	2e-99	303
NechaP70989	4575	31.86	656	332	11	85	662	48	666	1e-102	330
NechaP47081	544|PHI:544|BCMFS1|AAF64435|332648|Botrytis	38.49	569	290	9	20	529	22	589	6e-119	371
NechaP46784	1795|PHI:1795|GzZC110|I1RSX8|5518|Gibberella	21.89	402	273	12	72	434	92	491	4e-15	75.5
NechaP95465	822|PHI:822|Ip|AAB97419|54734|Mycosphaerella	69.11	246	55	1	31	255	50	295	1e-127	365
NechaP95468	1662|PHI:1662|GzCCHC002|I1REJ1|5518|Gibberella	26.26	457	303	12	2	439	634	1075	1e-32	130
NechaP95470	1486|PHI:1486|GzHMG018|I1RNM1|5518|Gibberella	72.37	409	94	10	1	402	1	397	3e-146	422
NechaP47149	508|PHI:508|AFT1|BAB69076|5599|Alternaria	32.65	533	321	16	31	535	40	562	5e-63	216
NechaP95478	2028|PHI:2028|TGL1-2|G4NBI7|148305|Magnaporthe	61.63	761	231	10	16	717	37	795	0	936
NechaP47187	2715|PHI:2715|PEX6	92.22	1003	74	2	139	1138	243	1244	0	1842
NechaP47156	2643|PHI:2643|CFAS|A4HTK3|5671|Leishmania	33.45	281	161	10	195	460	190	459	1e-29	119
NechaP62758	1460|PHI:1460|GzAra008|I1S2F6|5518|Gibberella	27.11	273	146	11	67	327	49	280	1e-12	65.1
NechaP71025	259|PHI:259|GPI7|AAL83897|5476|Candida	35.46	361	181	13	76	418	8	334	3e-46	177
NechaP47058	323|PHI:323|VFGLU1|AAO63562|93591|Verticillium	38.97	426	220	14	6	410	3	409	8e-91	281
NechaP95486	2309|PHI:2309|BcatrB|Q9UW03|40559|Botrytis	29.32	556	350	17	10	546	801	1332	1e-58	213
NechaP95486	2309|PHI:2309|BcatrB|Q9UW03|40559|Botrytis	23.08	598	411	12	5	556	73	667	4e-41	158
NechaP46703	1862|PHI:1862|GzZC177|I1RL97|5518|Gibberella	49.3	568	255	11	11	566	10	556	5e-176	513
NechaP95488	800|PHI:800|MGG_13324|EDK00897|318829|Magnaporthe	25.55	227	118	11	306	503	270	474	1e-07	52
NechaP101274	1259|PHI:1259|FGSG_03499|I1RNK3|5518|Gibberella	77.3	1031	211	8	1	1022	1	1017	0	1540
NechaP123202	267|PHI:267|MLT1|AAD51594|5476|Candida	37.07	1624	902	29	1	1541	17	1603	0	1003
NechaP62784	1309|PHI:1309|GzbHLH010|I1RNI6|5518|Gibberella	87.21	305	35	3	6	309	5	306	0	531
NechaP62787	806|PHI:806|MGG_04137|EDJ99440|318829|Magnaporthe	25.19	131	95	1	129	256	29	159	5e-08	51.2
NechaP106311	2825|PHI:2825|SET1|Q5ABG1|5476|Candida	32.62	141	93	1	178	316	900	1040	1e-20	94.7
NechaP62794	3126	27.66	423	220	16	54	456	29	385	3e-28	113
NechaP71061	286|PHI:286|CLC-A|AAO73005|5207|Cryptococcus	34.23	596	334	12	302	856	194	772	3e-98	327
NechaP71061	286|PHI:286|CLC-A|AAO73005|5207|Cryptococcus	25	116	69	3	114	211	46	161	7e-10	60.1
NechaP46616	1265|PHI:1265|FGSG_06970|I1RNH0|5518|Gibberella	64.67	317	112	0	130	446	1	317	6e-152	436
[truncated: 3,342 more rows]
