# Supplementary material for: De novo genome assembly of Geosmithia morbida, the causal agent of thousand cankers disease
Source: PeerJ. 2016 May 2;4:e1952. doi: 10.7717/peerj.1952 (PMC4860301; doi:10.7717/peerj.1952)
Supplement: Supplemental Information 3 [file peerj-04-1952-s003.xlsx]

## Sheet: Sheet1
queryID	subjectID	percIdentity	alnLength	mismatch	gapopen	start_of_aln in query	end_of_aln in query	start_of_aln in subject	end_of_aln in subject	evalue	bitscore
EFX01560	2978|PHI:2978|MoCel12A|G4N5V2|148305|Magnaporthe	35.27	258	152	7	6	248	1	258	1e-42	146
EFX05126	1046|PHI:1046|CTB5|ABK64182|29003|Cercospora	30.37	191	119	4	84	273	8	185	3e-15	75.5
EFX05124	144|PHI:144|CHT42|AAC05829|29875|Trichoderma	28.87	381	197	17	454	794	39	385	3e-23	102
EFX00827	101|PHI:101|ALB1|AAC39471|5085|Aspergillus	39.36	2162	1126	47	3	2099	104	2145	0	1468
EFX00946	2022|PHI:2022|BUF1|MGG_02252|148305|Magnaporthe	60	255	101	1	11	264	27	281	1e-101	299
EFX00905	112|PHI:112|MAK1|AAC49410|140110|Nectria	40	350	190	7	53	402	113	442	5e-81	258
EFX00868	413|PHI:413|MPD1|AAT84078|13684|Stagonospora	33.98	465	252	15	4	446	6	437	2e-66	220
EFX00778	2731|PHI:2731|VdSge1|G2XD29|27337|Verticillium	31.87	524	286	3	5	458	25	547	3e-82	266
EFX00774	1809|PHI:1809|GzZC124|I1REW1|5518|Gibberella	25.75	765	457	19	35	741	28	739	3e-60	215
EFX00856	1662|PHI:1662|GzCCHC002|I1REJ1|5518|Gibberella	28.01	332	214	8	50	364	657	980	5e-35	137
EFX00812	2315|PHI:2315|ChLae1|G4XKY9|5016|Cochliobolus	30.7	228	144	6	97	317	70	290	2e-26	104
EFX00908	1685|PHI:1685|GzRad003|I1S5Z3|5518|Gibberella	27.48	222	131	8	28	239	235	436	3e-11	62.4
EFX00755	3066	54.55	1100	401	28	601	1658	493	1535	0	988
EFX00957	1843|PHI:1843|GzZC158|I1S4X3|5518|Gibberella	46.74	567	257	7	303	862	221	749	6e-170	526
EFX00957	1843|PHI:1843|GzZC158|I1S4X3|5518|Gibberella	44.16	197	82	5	137	333	131	299	2e-30	127
EFX00771	3024	38.33	360	200	6	51	393	67	421	1e-68	224
EFX00786	2020|PHI:2020|Tup1|XP_759427|5270|Ustilago	26.47	170	115	3	140	300	456	624	2e-12	68.6
EFX00817	2960|PHI:2960|frdA|C5BDL7|67780|Edwardsiella	33.12	308	115	13	189	475	189	426	6e-25	107
EFX00901	2529|PHI:2529|ERG10|Q4WCL5|746128|Aspergillus	71.18	399	114	1	1	399	1	398	0	574
EFX00843	2968|PHI:2968|Hxs1|J9VQA5|5207|Cryptococcus	30.68	528	348	6	17	541	5	517	3e-88	283
EFX00831	1943|PHI:1943|GzZC258|I1RY79|5518|Gibberella	48.25	630	217	16	1	541	1	610	0	556
EFX00831	1943|PHI:1943|GzZC258|I1RY79|5518|Gibberella	44.64	168	55	7	548	711	716	849	3e-30	124
EFX00779	1627|PHI:1627|GzTF2S002|I1RW90|5518|Gibberella	52.94	34	16	0	297	330	75	108	2e-08	49.7
EFX00810	1605|PHI:1605|GzOB046|I1S216|5518|Gibberella	43.96	91	46	2	557	642	437	527	2e-13	70.9
EFX00803	2524|PHI:2524|nudC|Q70ZY8|746128|Aspergillus	58.73	189	73	3	1	188	15	199	4e-72	218
EFX00762	2038|PHI:2038|Mir1|MGG_02370|148305|Magnaporthe	26.01	173	115	5	108	276	48	211	1e-07	50.4
EFX00832	1662|PHI:1662|GzCCHC002|I1REJ1|5518|Gibberella	30.15	481	293	8	77	549	70	515	6e-51	188
EFX00928	2042|PHI:2042|ABC3|Q3Y5V5|148305|Magnaporthe	27.59	232	144	10	549	762	1087	1312	2e-11	65.1
EFX00842	2616|PHI:2616|InlA|Q2L8G9|1639|Listeria	34.95	206	125	4	176	377	99	299	9e-22	95.5
EFX00842	2616|PHI:2616|InlA|Q2L8G9|1639|Listeria	30.8	263	166	4	128	388	150	398	2e-21	94.7
EFX00842	2616|PHI:2616|InlA|Q2L8G9|1639|Listeria	30.54	239	135	3	139	377	202	409	5e-21	93.2
EFX00842	2616|PHI:2616|InlA|Q2L8G9|1639|Listeria	30.57	193	123	3	122	314	231	412	3e-17	82
EFX00842	2616|PHI:2616|InlA|Q2L8G9|1639|Listeria	33.52	182	116	3	208	387	87	265	1e-12	67.4
EFX00876	1317|PHI:1317|GzBrom002|I1RQE9|5518|Gibberella	40	105	61	2	307	409	319	423	3e-16	78.6
EFX00835	1622|PHI:1622|GzJUM004|I1RRU8|5518|Gibberella	55.51	472	190	8	25	491	16	472	0	538
EFX00846	423|PHI:423|VAD1|AAV41010|5207|Cryptococcus	42.35	366	208	3	25	389	38	401	4e-96	301
EFX00899	211|PHI:211|CaTUP1|AAB63195|5476|Candida	28.45	239	140	6	60	294	260	471	1e-19	91.3
EFX00899	211|PHI:211|CaTUP1|AAB63195|5476|Candida	22.83	254	169	6	19	246	261	513	1e-11	65.9
EFX00899	211|PHI:211|CaTUP1|AAB63195|5476|Candida	25	180	113	7	140	319	201	358	8e-10	60.1
EFX00760	799|PHI:799|MGG_03530|EDJ94565|318829|Magnaporthe	51.77	933	293	26	6	855	47	905	0	775
EFX00761	2531|PHI:2531|PRI1|Q4WXC5|746128|Aspergillus	57.61	519	192	7	1	508	1	502	0	615
EFX00820	777|PHI:777|MGG_00883|EDK02450|318829|Magnaporthe	53.53	964	308	28	909	1824	643	1514	0	819
EFX00820	777|PHI:777|MGG_00883|EDK02450|318829|Magnaporthe	37.33	509	230	17	291	793	169	594	5e-68	251
EFX00985	2510|PHI:2510|msdS/AfmsdC|Q6PWQ1|746128|Aspergillus	34.95	186	108	3	198	376	31	210	1e-25	108
EFX00985	2510|PHI:2510|msdS/AfmsdC|Q6PWQ1|746128|Aspergillus	39.42	104	58	1	824	922	396	499	4e-16	79.7
EFX00985	2510|PHI:2510|msdS/AfmsdC|Q6PWQ1|746128|Aspergillus	26.51	166	101	4	497	661	222	367	8e-08	53.1
EFX00816	1646|PHI:1646|GzWing018|I1RW28|5518|Gibberella	31.49	235	95	5	417	651	567	735	4e-33	135
EFX00972	3594	42.11	95	44	3	244	337	631	715	7e-13	69.3
EFX00972	3594	29.83	181	90	8	405	567	721	882	5e-07	50.4
EFX00955	1566|PHI:1566|GzOB006|I1RC95|5518|Gibberella	43.3	358	202	1	65	422	34	390	5e-97	297
EFX00873	2841|PHI:2841|CnSEC14-2|F6K8L6|5207|Cryptococcus	43.94	264	121	4	21	270	1	251	2e-68	216
EFX00865	697|PHI:697|ugt51E1|AAM81358|5022|Leptosphaeria	67.72	381	120	3	21	400	19	397	0	555
EFX00920	2962|PHI:2962|glyA|C5BEV2|67780|Edwardsiella	48.53	408	184	7	14	420	4	386	1e-114	345
EFX00934	1317|PHI:1317|GzBrom002|I1RQE9|5518|Gibberella	56.06	1222	414	26	6	1216	28	1137	0	1169
EFX00918	3416	25.88	398	238	14	141	525	157	510	1e-14	74.3
EFX00903	1244|PHI:1244|FGSG_00792|I1RA20|5518|Gibberella	77.13	411	84	5	2	412	4	404	0	654
EFX00801	2538|PHI:2538|AUR1|Q4WXL8|746128|Aspergillus	52.19	389	158	6	25	410	35	398	3e-133	394
EFX00853	1764|PHI:1764|GzZC079|Q4I0C5|5518|Gibberella	33.45	565	272	14	11	573	82	544	5e-98	310
EFX00902	1555|PHI:1555|GzMyb019|I1RDG6|5518|Gibberella	25	460	315	12	30	469	65	514	7e-34	131
EFX00787	1363|PHI:1363|TRI15|I1RJ74|5518|Gibberella	37.24	290	139	5	5	293	76	323	3e-57	187
EFX00913	1399|PHI:1399|GzC2H062|I1RV74|5518|Gibberella	25.78	225	139	8	281	496	275	480	3e-11	63.9
EFX00796	1608|PHI:1608|GzP53L001|Q4IR08|5518|Gibberella	77.87	235	46	3	1	230	1	234	2e-123	355
EFX00797	280|PHI:280|CCN1|AAG36938|5207|Cryptococcus	28.57	126	78	3	228	353	72	185	6e-07	50.8
EFX00800	3278	29.02	286	157	8	146	429	1049	1290	4e-22	100
EFX00914	3381	31.98	519	270	13	87	531	174	683	2e-67	231
EFX00844	1414|PHI:1414|GzC2H081|I1RZL0|5518|Gibberella	50.18	564	241	15	1	553	1	535	2e-156	459
EFX00962	443|PHI:443|CBL1||5518|Fusarium	29.33	150	92	5	843	986	154	295	1e-08	56.2
EFX00981	1600|PHI:1600|GzOB041|I1RZK5|5518|Gibberella	69.57	115	35	0	385	499	9	123	1e-46	160
EFX00795	2553|PHI:2553|VPS4|Q5AG40|5476|Candida	40.68	322	144	4	556	845	132	438	1e-75	253
EFX00849	2077|PHI:2077|Moatg9|MGG_09559|148305|Magnaporthe	54.61	987	370	21	1	982	1	914	0	1026
EFX00808	2167|PHI:2167|EXP5|G4N1A3|148305|Magnaporthe	58.55	1293	501	10	18	1305	8	1270	0	1531
EFX00811	1974|PHI:1974|GzZC289|I1RQN6|5518|Gibberella	49.73	374	158	3	10	370	149	505	1e-118	359
EFX00960	170|PHI:170|CMK1|AAD50496|5462|Colletotrichum	98.59	355	5	0	1	355	1	355	0	734
EFX00900	358|PHI:358|ILV2|AAR29084|5207|Cryptococcus	21.46	536	309	19	34	502	141	631	8e-09	55.5
EFX00931	1615|PHI:1615|GzSGT1|I1RZJ1|5518|Gibberella	42.89	443	181	11	1	435	250	628	2e-90	288
EFX00829	2544|PHI:2544|PAB1|Q4WK03|746128|Aspergillus	23.2	181	108	4	168	332	138	303	2e-09	56.2
EFX00945	1491|PHI:1491|GzHMG023|I1RST1|5518|Gibberella	19.38	160	109	3	655	812	383	524	8e-10	59.7
EFX00768	2038|PHI:2038|Mir1|MGG_02370|148305|Magnaporthe	25.17	294	191	10	110	388	13	292	2e-10	58.9
EFX00890	1414|PHI:1414|GzC2H081|I1RZL0|5518|Gibberella	31.96	97	55	2	423	519	23	108	6e-07	49.3
EFX00845	2072|PHI:2072|Moatg4|MGG_03580|148305|Magnaporthe	48.89	270	95	3	8	236	1	268	1e-77	247
EFX00845	2072|PHI:2072|Moatg4|MGG_03580|148305|Magnaporthe	70.77	130	35	2	219	346	361	489	1e-52	181
EFX00834	1468|PHI:1468|GzCCAAT008|Q4HTT1|5518|Gibberella	94.17	120	6	1	16	135	16	134	3e-76	223
EFX06712	413|PHI:413|MPD1|AAT84078|13684|Stagonospora	38.33	60	36	1	2	61	5	63	4e-08	47
EFX06708	1851|PHI:1851|GzZC166|I1RXJ3|5518|Gibberella	40.45	487	237	8	101	571	111	560	3e-95	314
EFX02571	167|PHI:167|CHIP3|AAF00024|5457|Colletotrichum	30.38	237	141	6	69	290	90	317	6e-21	92.8
EFX05195	1544|PHI:1544|GzMyb008|I1RG68|5518|Gibberella	74.32	74	19	0	185	258	115	188	4e-31	114
EFX05193	1515|PHI:1515|GzHOMEL009|I1RG67|5518|Gibberella	47.09	361	138	14	9	351	22	347	2e-86	266
EFX05194	3097	74.56	511	121	3	1	510	1	503	0	783
EFX05196	337|PHI:337|CHS7|AAT77184|5507|Fusarium	81.16	329	62	0	2	330	3	331	0	572
EFW98961	2256|PHI:2256|Xdh1|Q0UA24|13684|Phaeosphaeria	27.33	150	98	4	100	240	132	279	3e-07	48.9
EFW98669	2624|PHI:2624|aroA|P07637|90371|Salmonella	41.84	423	225	12	421	841	19	422	9e-80	270
EFW98548	1367|PHI:1367|GzC2H028|I1RK94|5518|Gibberella	41.39	674	277	24	131	796	52	615	5e-123	384
EFW98993	3278	70.32	957	265	3	1528	2483	934	1872	0	1406
EFW98993	3278	66.84	374	120	2	2555	2926	1873	2244	2e-145	505
EFW98993	3278	43.89	638	313	15	1023	1641	14	625	6e-140	488
EFW98969	2354|PHI:2354|AMT2|XP_390894|5518|Gibberella	50.27	547	233	7	852	1398	8	515	1e-173	529
EFW98833	2084|PHI:2084|Moatg18|MGG_03139|148305|Magnaporthe	72.61	482	102	6	1	469	1	465	0	684
EFW98985	2193|PHI:2193|MoRgs2|XP_361183|148305|Magnaporthe	54.46	314	104	9	7	317	5	282	1e-82	263
EFW98610	3272	27.6	500	292	21	107	587	55	503	1e-32	130
EFW98488	860|PHI:860|MSP1|AAX07670|318829|Magnaporthe	37.94	282	165	3	1387	1660	75	354	2e-48	179
EFW99010	1416|PHI:1416|GzC2H083|I1S0D8|5518|Gibberella	42.4	250	116	6	2904	3152	326	548	3e-54	201
EFW98802	3004|PHI:3004|ClpX|A6QHK8|1280|Staphylococcus	39.51	367	160	6	188	548	100	410	2e-72	238
EFW98777	3411	30.4	352	230	7	793	1140	81	421	9e-39	149
EFW98492	1393|PHI:1393|GzC2H056|I1RU69|5518|Gibberella	23.76	181	121	6	125	291	570	747	3e-08	52
EFW98725	2694|PHI:2694|	33.02	318	177	11	260	571	141	428	4e-29	118
EFW98751	882|PHI:882|MGG_04985|EDJ95433|318829|Magnaporthe	29.2	250	155	3	544	793	468	695	1e-27	117
EFW98460	2491|PHI:2491|FgPTC1|I1RJS9|5518|Gibberella	31.72	145	65	4	327	471	317	427	1e-09	60.1
EFW98578	1260|PHI:1260|FGSG_13944|I1RUC7|5518|Gibberella	33.33	138	76	3	137	258	409	546	5e-11	63.5
EFW98578	1260|PHI:1260|FGSG_13944|I1RUC7|5518|Gibberella	35.24	105	64	1	146	250	504	604	2e-10	61.6
EFW98578	1260|PHI:1260|FGSG_13944|I1RUC7|5518|Gibberella	34.48	87	57	0	172	258	493	579	2e-09	58.2
EFW98578	1260|PHI:1260|FGSG_13944|I1RUC7|5518|Gibberella	36.71	79	50	0	172	250	559	637	7e-09	56.6
EFW99038	253|PHI:253|FOS1|AAK27436|5085|Aspergillus	34.04	470	239	11	1963	2425	302	707	6e-63	230
EFW98703	2032|PHI:2032|VTL1|G4NGA7|148305|Magnaporthe	24.11	477	251	14	784	1257	43	411	8e-22	98.6
EFW98419	1579|PHI:1579|GzOB019|I1RM25|5518|Gibberella	45.22	670	313	10	21	689	530	1146	0	569
EFW98558	3331	29.29	140	89	4	107	238	54	191	7e-08	49.3
EFW98798	1629|PHI:1629|GzWing001|I1RAH2|5518|Gibberella	29	200	113	9	18	204	33	216	6e-10	60.5
EFW98891	2428|PHI:2428|ypd1|F8UWJ7|5207|Cryptococcus	38.06	134	76	1	94	220	73	206	2e-21	86.7
EFW98941	2858|PHI:2858|FvVE1	59.8	296	108	4	4	295	5	293	5e-111	345
EFW98556	883|PHI:883|MGG_08560|EDJ97072|318829|Magnaporthe	47.93	121	37	3	1	95	1	121	2e-10	51.6
EFW98715	2928|PHI:2928|lip22|J9NNZ8|59765|Fusarium	58.77	405	150	5	34	422	31	434	5e-161	463
EFW98600	1629|PHI:1629|GzWing001|I1RAH2|5518|Gibberella	37.19	527	291	16	1	517	32	528	4e-95	315
EFW98600	1629|PHI:1629|GzWing001|I1RAH2|5518|Gibberella	31.13	106	69	2	671	776	701	802	6e-09	56.6
EFW98489	270|PHI:270|RHO1|BAA24262|5476|Candida	78.97	195	39	1	2	196	6	198	3e-108	310
EFW98507	2393|PHI:2393|Related	25.8	314	184	13	207	493	117	408	8e-14	70.9
EFW98445	1958|PHI:1958|GzZC273|I1RMD1|5518|Gibberella	47.76	67	35	0	2	68	76	142	4e-15	76.3
EFW98408	1988|PHI:1988|GzZC303|I1RAP1|5518|Gibberella	22.84	429	221	16	25	422	21	370	4e-16	79.7
EFW99045	697|PHI:697|ugt51E1|AAM81358|5022|Leptosphaeria	29.26	311	200	11	135	433	84	386	2e-26	110
EFW98740	1989|PHI:1989|GzZC304|I1R9Z6|5518|Gibberella	68	150	48	0	160	309	65	214	2e-75	248
EFW98740	1989|PHI:1989|GzZC304|I1R9Z6|5518|Gibberella	39.09	243	142	3	372	614	211	447	4e-60	207
EFW99043	1537|PHI:1537|MYT1|I1RA01|5518|Gibberella	52.01	298	113	6	182	477	4	273	5e-83	261
EFW98674	2401|PHI:2401|CaRING1|G0T3B3|456327|Xanthomonas	48.15	54	26	2	348	400	97	149	7e-10	56.2
EFW98999	440|PHI:440|PMR1|CAB87245|5476|Candida	27.14	781	468	23	81	779	36	797	3e-70	249
EFW98989	254|PHI:254|FOW1|BAB85760|5507|Fusarium	84.33	300	47	0	18	317	19	318	1e-171	481
EFW98570	447|PHI:447|MCSA|CAI61947|5085|Aspergillus	54.37	469	197	8	1	462	1	459	7e-169	486
EFW98432	3385	71.23	431	123	1	1	431	1	430	0	629
EFW98866	339|PHI:339|CLPT1|CAC41973|290576|Colletotrichum	25.5	251	105	6	10	260	7	175	2e-20	85.5
EFW98718	454|PHI:454|PMT2|EAL01044|5476|Candida	49.35	766	353	10	9	741	2	765	0	755
EFW98734	441|PHI:441|BTP1|CAE55153|40559|Botrytis	22.94	231	155	6	53	267	67	290	2e-09	56.6
EFW98630	1267|PHI:1267|FGSG_05586|I1RKK7|5518|Gibberella	67.24	870	180	18	3	868	6	774	0	1082
EFW99061	1289|PHI:1289|FGSG_04416|I1RKK5|5518|Gibberella	80.85	449	73	1	1	449	1	436	0	761
EFW98636	825|PHI:825|SE|AAQ18216|5551|Trichophyton	59.62	468	182	3	3	470	27	487	0	553
EFW98523	2835|PHI:2835|RED2|C3JXE8|5016|Cochliobolus	36.84	190	102	4	80	255	75	260	4e-28	109
EFW99039	1198|PHI:1198|(Sc	26.85	108	71	1	195	302	1076	1175	1e-07	52
EFW98931	33|PHI:33|PHR1|AAA68196|5476|Candida	36.61	366	198	4	16	364	18	366	4e-79	268
EFW98522	2329|PHI:2329|CTB4|A0ST42|29003|Cercospora	34.73	501	306	6	106	589	14	510	1e-98	311
EFW98701	178|PHI:178|pabaA|AAD31929|5085|Aspergillus	23.24	426	269	13	732	1118	406	812	6e-20	93.2
EFW98568	4194	31.52	495	299	13	15	481	14	496	1e-60	207
EFW98848	320|PHI:320|SSN6|AAL54912|5476|Candida	59.24	395	138	5	34	406	91	484	1e-153	481
EFW98747	2002|PHI:2002|TIG1|MGG-03198.5|148305|Magnaporthe	51.8	693	241	19	1	615	1	678	0	649
EFW98872	3274	23.98	709	408	21	36	689	1405	2037	2e-21	97.4
EFW98458	191|PHI:191|TOM1|AAB08446|39703|Septoria	25.91	274	170	10	125	387	108	359	6e-08	53.9
EFW98587	2038|PHI:2038|Mir1|MGG_02370|148305|Magnaporthe	22.18	257	175	8	23	262	25	273	3e-08	51.6
EFW98661	600|PHI:600|CBP1|AAF63734|5207|Cryptococcus	26.78	239	148	7	69	291	13	240	9e-12	61.6
EFW98757	1469|PHI:1469|GzHMG001|I1R9Z0|5518|Gibberella	36.63	101	45	4	1823	1923	1327	1408	6e-12	68.6
EFW98757	1469|PHI:1469|GzHMG001|I1R9Z0|5518|Gibberella	72.73	44	12	0	913	956	670	713	6e-11	65.1
EFW98982	854|PHI:854|um01947|EAK82380|5270|Ustilago	40.33	367	190	7	16	365	2	356	6e-80	256
EFW98618	3161	59.05	1121	384	16	1025	2110	914	1994	0	1271
EFW98618	3161	40.79	890	432	32	38	903	43	861	5e-141	485
EFW98563	1376|PHI:1376|GzC2H039|I1RPM7|5518|Gibberella	57.86	496	152	11	1	494	1	441	0	555
EFW98659	337|PHI:337|CHS7|AAT77184|5507|Fusarium	30.38	260	173	3	7	265	28	280	2e-24	98.2
EFW99000	2968|PHI:2968|Hxs1|J9VQA5|5207|Cryptococcus	28.51	463	297	12	237	677	13	463	2e-41	156
EFW98438	226|PHI:226|PEX6|AAK16738|5462|Colletotrichum	31.49	578	311	18	235	780	768	1292	2e-61	224
EFW98438	226|PHI:226|PEX6|AAK16738|5462|Colletotrichum	31.67	221	140	6	197	406	995	1215	4e-26	112
EFW98487	2293|PHI:2293|cycA|B0XTA5|746128|Aspergillus	77.78	99	22	0	5	103	64	162	3e-53	167
EFW98443	3348	44.87	78	42	1	253	330	4	80	4e-12	60.1
EFW98726	1345|PHI:1345|GzC2H005|I1RAW2|5518|Gibberella	32.24	245	114	6	86	325	43	240	2e-34	126
EFW98810	1301|PHI:1301|GzbHLH002|I1RB45|5518|Gibberella	67	100	32	1	1	100	1	99	6e-43	137
EFW98524	194|PHI:194|URE1|AAC62257|5207|Cryptococcus	57.93	858	330	9	1	853	1	832	0	1008
EFW98806	1473|PHI:1473|GzHMG005|I1RB25|5518|Gibberella	61.28	297	96	8	20	307	61	347	3e-99	297
EFW98497	465|PHI:465|KIN2|AAB63337|5270|Ustilago	37.27	381	199	12	104	460	3	367	2e-63	232
EFW98873	339|PHI:339|CLPT1|CAC41973|290576|Colletotrichum	35.55	211	120	5	13	218	3	202	2e-35	124
EFW98832	1472|PHI:1472|GzHMG004|I1RAZ9|5518|Gibberella	34.83	178	82	6	239	384	389	564	3e-18	84.3
EFW98832	1472|PHI:1472|GzHMG004|I1RAZ9|5518|Gibberella	33.13	166	76	6	83	225	137	290	2e-09	56.2
EFW98832	1472|PHI:1472|GzHMG004|I1RAZ9|5518|Gibberella	48.89	45	22	1	33	77	3	46	3e-07	49.7
EFW98879	2823|PHI:2823|PES1|Q59X38|5476|Candida	42.94	531	216	10	1	517	1	458	1e-134	410
EFW99025	2654|PHI:2654|DUR1,2|Q59VF3|5476|Candida	30.88	204	114	4	172	365	70	256	9e-13	70.5
EFW98602	2113|PHI:2113|Kin4|MGG_01196|148305|Magnaporthe	54.78	1066	333	30	2	982	16	1017	0	956
EFW98602	2113|PHI:2113|Kin4|MGG_01196|148305|Magnaporthe	79.17	48	9	1	1081	1128	1172	1218	4e-15	77.8
EFW98707	2103|PHI:2103|Vacuolar	51.51	332	116	13	574	881	433	743	3e-73	260
EFW98707	2103|PHI:2103|Vacuolar	60.74	270	68	3	230	462	91	359	4e-68	245
EFW98803	1458|PHI:1458|GzAra006|Q4I7F9|5518|Gibberella	22.3	556	254	15	199	730	282	683	1e-22	100
EFW98884	1662|PHI:1662|GzCCHC002|I1REJ1|5518|Gibberella	27.36	201	136	3	29	229	668	858	3e-21	93.6
EFW98972	144|PHI:144|CHT42|AAC05829|29875|Trichoderma	27.14	269	141	11	530	765	58	304	6e-15	76.6
EFW98555	1443|PHI:1443|GzGATA001|I1RB11|5518|Gibberella	51.29	425	144	5	131	554	107	469	8e-140	416
EFW98644	1565|PHI:1565|GzOB005|I1RBF6|5518|Gibberella	46.52	561	234	12	95	615	18	552	2e-150	448
EFW98559	1564|PHI:1564|GzOB004|Q4IPZ1|5518|Gibberella	70.51	78	23	0	1	78	1	78	3e-38	124
EFW99018	2570|PHI:2570|CYB2|Q6FM61|5478|Candida	35.07	402	218	8	14	410	197	560	2e-69	231
EFW98908	2315|PHI:2315|ChLae1|G4XKY9|5016|Cochliobolus	34.25	292	180	6	62	344	2	290	8e-53	184
EFW99057	2247|PHI:2247|Sch1|EAT82552|13684|Phaeosphaeria	38.27	277	152	10	23	294	20	282	7e-44	152
EFW99026	2825|PHI:2825|SET1|Q5ABG1|5476|Candida	37.07	116	63	4	1094	1209	909	1014	1e-12	70.5
EFW98653	106|PHI:106|CAT1|AAC39448|5476|Candida	53.75	480	188	6	17	464	3	480	3e-173	498
EFW99030	259|PHI:259|GPI7|AAL83897|5476|Candida	34.05	370	190	13	68	424	6	334	2e-44	171
EFW98695	882|PHI:882|MGG_04985|EDJ95433|318829|Magnaporthe	38.65	802	344	24	106	860	73	773	1e-148	463
EFW98613	423|PHI:423|VAD1|AAV41010|5207|Cryptococcus	32.45	379	232	7	140	516	38	394	2e-51	185
EFW98730	4468	78.45	515	98	6	27	532	16	526	0	810
EFW98922	2020|PHI:2020|Tup1|XP_759427|5270|Ustilago	26.53	245	142	11	76	300	500	726	2e-10	60.8
EFW98922	2020|PHI:2020|Tup1|XP_759427|5270|Ustilago	25.4	126	71	4	93	209	474	585	4e-08	53.5
EFW98954	1552|PHI:1552|GzMyb016|I1S0N5|5518|Gibberella	46.39	485	241	7	572	1054	167	634	2e-136	451
EFW98761	1265|PHI:1265|FGSG_06970|I1RNH0|5518|Gibberella	32.5	120	69	5	282	396	196	308	1e-10	60.1
EFW98761	1265|PHI:1265|FGSG_06970|I1RNH0|5518|Gibberella	36.14	83	52	1	185	266	1	83	1e-08	53.5
EFW98516	2822|PHI:2822|Cxt1p|Q5K8R6|5207|Cryptococcus	28.08	577	328	18	72	620	145	662	3e-56	201
EFW98774	2322|PHI:2322|SidH|Q4WF54|746128|Aspergillus	31.25	256	166	5	40	289	14	265	2e-33	123
EFW98686	1976|PHI:1976|GzZC291|I1RLP8|5518|Gibberella	69.7	33	10	0	10	42	21	53	1e-11	63.9
EFW98973	2081|PHI:2081|Moatg15|MGG_12828|148305|Magnaporthe	64.48	670	174	8	11	658	6	633	0	813
EFW98402	510|PHI:510|CaNAG3|EAK93097|5476|Candida	24.51	457	300	14	28	466	73	502	2e-19	88.6
EFW98579	1656|PHI:1656|GzYL|I1RFN9|5518|Gibberella	49.41	340	97	6	34	372	46	311	1e-73	257
EFW98535	319|PHI:319|SQL2|AAO19638|5270|Ustilago	31.9	464	255	9	763	1167	924	1385	4e-66	242
EFW98535	319|PHI:319|SQL2|AAO19638|5270|Ustilago	35.07	134	62	6	14	145	89	199	2e-12	68.9
EFW98717	1374|PHI:1374|GzC2H037|I1RN37|5518|Gibberella	75.34	807	185	6	1	797	1	803	0	1271
EFW98893	770|PHI:770|CPG2|AAA67706|5116|Cryphonectria	96.6	353	12	0	1	353	1	353	0	720
EFW99031	2247|PHI:2247|Sch1|EAT82552|13684|Phaeosphaeria	29.46	241	137	11	30	267	30	240	4e-09	54.7
EFW99032	2322|PHI:2322|SidH|Q4WF54|746128|Aspergillus	24.74	190	135	4	3	189	4	188	3e-07	47.8
EFW98560	2601|PHI:2601|Asc1|P83774|746128|Aspergillus	26.38	163	100	5	97	258	77	220	4e-09	55.5
EFW98560	2601|PHI:2601|Asc1|P83774|746128|Aspergillus	32.46	114	74	1	126	239	15	125	6e-08	51.6
EFW98738	3061	58.91	1268	362	37	4	1217	1	1163	0	1294
EFW98457	2378|PHI:2378|DEP4|D2E9W9|29001|Alternaria	24.34	378	251	11	22	387	6	360	5e-08	52.8
EFW98540	3387	30.76	1216	676	29	1	1151	652	1766	5e-146	492
EFW98603	726|PHI:726|PKS7|AAS57292|5518|Fusarium	51.33	413	163	1	22	396	1	413	3e-138	405
EFW98510	3390	25	272	130	10	1	207	1	263	4e-10	55.5
EFW98529	1161|PHI:1161|MgMfs1|A4ZGP3|54734|Mycosphaerella	27.75	519	303	18	20	483	62	563	9e-42	155
EFW98919	1804|PHI:1804|GzZC119|I1RUX5|5518|Gibberella	32.08	505	288	9	164	662	117	572	4e-79	267
EFW98721	3226	55.43	368	158	5	1	368	1	362	3e-131	382
EFW98959	1555|PHI:1555|GzMyb019|I1RDG6|5518|Gibberella	27.63	456	292	11	50	481	74	515	1e-34	134
EFW98409	1052|PHI:1052|PHL1|ACB38886|135779|Cercospora	32.42	182	97	5	425	584	407	584	1e-21	96.7
EFW98547	2329|PHI:2329|CTB4|A0ST42|29003|Cercospora	35.85	463	289	6	122	581	51	508	2e-90	289
EFW99062	3126	30.19	308	165	11	60	350	33	307	3e-29	116
EFW98924	2058|PHI:2058|LHS1|MGG_06648.5|148305|Magnaporthe	25.39	445	276	13	48	441	23	462	3e-24	105
EFW98544	2054|PHI:2054|Rac1|A0SXQ7|148305|Magnaporthe	94.97	199	10	0	1	199	1	199	6e-141	393
EFW98633	62|PHI:62|caRSR1|AAB81286|5476|Candida	58.78	148	60	1	20	166	22	169	7e-59	186
EFW98822	1467|PHI:1467|GzCCAAT007|I1RXZ0|5518|Gibberella	66.67	156	27	1	22	177	8	138	8e-68	204
EFW98562	59|PHI:59|THR1|BAA18962|5462|Colletotrichum	28.06	196	128	4	1	187	28	219	5e-13	64.7
EFW98741	3415	27.27	374	239	12	262	628	182	529	5e-35	139
EFW98417	2545|PHI:2545|TIF35|Q4X1I3|746128|Aspergillus	62.38	303	89	8	12	311	10	290	3e-123	357
EFW98592	2654|PHI:2654|DUR1,2|Q59VF3|5476|Candida	42.38	151	80	2	110	260	75	218	2e-16	80.5
EFW98911	2101|PHI:2101|Vacuolar	25.06	431	262	13	80	498	110	491	6e-20	90.1
EFW99050	1647|PHI:1647|GzWing019|I1RWA9|5518|Gibberella	65.46	1274	322	24	32	1250	24	1234	0	1604
EFW98723	187|PHI:187|RUM1|AAG02418|5270|Ustilago	45.1	51	22	3	240	288	1671	1717	5e-08	53.5
EFW98784	1268|PHI:1268|FGSG_07816|I1RN43|5518|Gibberella	63.03	165	54	4	196	360	299	456	5e-64	211
EFW98784	1268|PHI:1268|FGSG_07816|I1RN43|5518|Gibberella	50.23	215	95	5	4	211	2	211	1e-52	180
EFW98493	784|PHI:784|MGG_00056|EDK03390|318829|Magnaporthe	32.27	282	151	10	23	294	16	267	2e-18	80.5
EFW98632	2544|PHI:2544|PAB1|Q4WK03|746128|Aspergillus	23.76	303	189	6	80	376	45	311	7e-29	117
EFW98632	2544|PHI:2544|PAB1|Q4WK03|746128|Aspergillus	22.68	441	249	11	89	463	142	556	3e-22	97.8
EFW98889	1214|PHI:1214|FGSG_07816|I1RN54|5518|Gibberella	65.32	1018	213	27	1	998	1	898	0	1161
EFW99042	1953|PHI:1953|GzZC268|I1RKB4|5518|Gibberella	41.54	65	37	1	48	112	33	96	1e-12	68.2
EFW98809	1500|PHI:1500|GzHMG032|I1S2F2|5518|Gibberella	24.55	721	448	29	6	677	211	884	3e-24	107
EFW98809	1500|PHI:1500|GzHMG032|I1S2F2|5518|Gibberella	40.59	101	55	1	1059	1159	1352	1447	9e-19	89.7
EFW99056	1458|PHI:1458|GzAra006|Q4I7F9|5518|Gibberella	30.75	387	219	10	105	470	301	659	9e-43	161
EFW98687	1958|PHI:1958|GzZC273|I1RMD1|5518|Gibberella	53.1	1064	364	26	1	1049	1	944	0	999
EFW98546	2038|PHI:2038|Mir1|MGG_02370|148305|Magnaporthe	25.84	329	178	11	80	399	29	300	8e-07	47.8
EFW98750	3457	50.37	542	238	8	30	560	20	541	3e-179	519
EFW98942	343|PHI:343|CPRGS-1|AAT92283|5116|Cryphonectria	77.1	511	112	2	250	757	1	509	0	813
EFW98572	1487|PHI:1487|GzHMG019|I1RQ92|5518|Gibberella	53.46	679	235	15	151	802	145	769	0	667
EFW99022	1678|PHI:1678|GzGRF|I1RMC1|5518|Gibberella	55.03	338	110	4	115	414	35	368	4e-123	364
EFW98927	1874|PHI:1874|GzZC189|I1RTS5|5518|Gibberella	26.12	490	237	18	62	514	80	481	5e-20	91.3
EFW98639	2544|PHI:2544|PAB1|Q4WK03|746128|Aspergillus	22.28	202	143	5	196	386	7	205	9e-10	58.5
EFW98639	2544|PHI:2544|PAB1|Q4WK03|746128|Aspergillus	27.33	172	101	8	257	416	163	322	4e-09	56.2
EFW98716	1228|PHI:1228|FGSG_07745|I1RR00|5518|Gibberella	23.71	232	134	8	90	302	153	360	1e-08	53.5
EFW98903	1616|PHI:1616|GzssDB001|I1RE55|5518|Gibberella	28.75	400	244	9	2	367	4	396	3e-41	159
EFW98481	3315	39.73	677	328	17	19	655	15	651	8e-107	339
EFW98895	2655|PHI:2655|lon|K1C7N5|287|Pseudomonas	49.35	462	214	7	494	955	311	752	5e-138	435
EFW98895	2655|PHI:2655|lon|K1C7N5|287|Pseudomonas	52.63	95	42	1	358	452	245	336	4e-21	96.7
EFW98929	1649|PHI:1649|GzWing021|I1RZ94|5518|Gibberella	47.9	286	128	6	1	278	1	273	4e-83	252
EFW98512	2528|PHI:2528|SLY1|Q4WYU7|746128|Aspergillus	22.2	428	283	15	731	1129	59	465	6e-17	83.6
EFW98423	803|PHI:803|MGG_04629|EDJ95969|318829|Magnaporthe	51.34	1194	487	29	4	1172	211	1335	0	1066
EFW98852	1616|PHI:1616|GzssDB001|I1RE55|5518|Gibberella	25.87	429	269	10	2	421	3	391	1e-21	97.4
EFW98847	801|PHI:801|MGG_04621|EDJ95977|318829|Magnaporthe	55.47	393	133	7	104	496	219	569	7e-144	429
EFW98591	3325	25.44	456	273	26	1	419	27	452	1e-14	73.9
EFW98576	1063|PHI:1063|MNH6|ABB30152|318829|Magnaporthe	81.91	94	16	1	1	94	1	93	4e-50	154
EFW99040	2085|PHI:2085|Moatg11|MGG_04486|148305|Magnaporthe	47.12	1301	568	25	1	1216	1	1266	0	1085
EFW98638	1260|PHI:1260|FGSG_13944|I1RUC7|5518|Gibberella	34.03	238	136	8	687	924	424	640	8e-18	85.9
EFW98638	1260|PHI:1260|FGSG_13944|I1RUC7|5518|Gibberella	32.35	238	140	7	653	890	424	640	4e-17	83.6
EFW98638	1260|PHI:1260|FGSG_13944|I1RUC7|5518|Gibberella	34.55	191	104	5	751	924	421	607	4e-13	70.5
EFW98638	1260|PHI:1260|FGSG_13944|I1RUC7|5518|Gibberella	27.5	240	127	7	595	830	452	648	1e-09	59.3
EFW98638	1260|PHI:1260|FGSG_13944|I1RUC7|5518|Gibberella	30.58	206	114	7	741	936	367	553	2e-07	52
EFW98913	3287	31.28	243	148	8	1671	1904	636	868	4e-26	114
EFW98683	2329|PHI:2329|CTB4|A0ST42|29003|Cercospora	34.67	199	115	7	25	216	28	218	2e-19	84.3
EFW98527	2530|PHI:2530|TUB1|Q4WKG5|746128|Aspergillus	69.66	445	121	4	4	447	3	434	0	634
EFW98461	541|PHI:541|LIP1|AAU87359|332648|Botrytis	34.26	289	151	12	38	308	55	322	2e-28	117
EFW98607	2968|PHI:2968|Hxs1|J9VQA5|5207|Cryptococcus	26.01	419	288	12	315	727	61	463	5e-34	134
EFW98796	1604|PHI:1604|GzOB045|I1S1V9|5518|Gibberella	93.79	145	9	0	1	145	1	145	1e-95	274
EFW98437	1624|PHI:1624|GzJUM006|I1SAP7|5518|Gibberella	63.56	601	179	6	1	594	1	568	0	778
EFW98532	2419|PHI:2419|CID1|I1RKF3|5518|Gibberella	55.29	255	111	2	1	255	1	252	1e-97	300
EFW98532	2419|PHI:2419|CID1|I1RKF3|5518|Gibberella	49.32	73	37	0	460	532	248	320	7e-20	88.2
EFW98538	812|PHI:812|MGG_10702|EDJ94108|318829|Magnaporthe	36.59	358	213	7	2	351	22	373	1e-66	218
EFW99037	1857|PHI:1857|GzZC172|I1S3I1|5518|Gibberella	34.04	711	352	16	154	864	65	658	1e-118	380
EFW99037	1857|PHI:1857|GzZC172|I1S3I1|5518|Gibberella	44.71	85	42	2	6	90	4	83	5e-12	67
EFW98896	513|PHI:513|ARN1	42.23	592	307	9	2	573	8	584	1e-159	471
EFW98608	922|PHI:922|um03615||5270|Ustilago	25.32	632	387	20	3	582	75	673	7e-48	176
EFW98945	1051|PHI:1051|CTB3|ABC79591|29003|Cercospora	27.2	386	227	15	3	350	452	821	2e-19	87.8
EFW98675	346|PHI:346|CRU1|AAN10186|5270|Ustilago	37.62	101	62	1	575	675	445	544	4e-14	73.2
EFW98675	346|PHI:346|CRU1|AAN10186|5270|Ustilago	21.84	206	123	6	310	513	270	439	5e-08	53.5
EFW98944	423|PHI:423|VAD1|AAV41010|5207|Cryptococcus	33.15	371	230	11	122	487	23	380	2e-46	171
EFW98434	2038|PHI:2038|Mir1|MGG_02370|148305|Magnaporthe	35.29	85	46	3	192	267	23	107	1e-07	49.3
EFW98425	2601|PHI:2601|Asc1|P83774|746128|Aspergillus	33.57	140	89	3	154	292	16	152	4e-13	68.9
EFW98471	1714|PHI:1714|GzZC029|I1RQU8|5518|Gibberella	42.98	691	313	13	87	772	76	690	3e-162	488
EFW99003	2171|PHI:2171|Peroxisomal	36.13	667	380	15	7	657	32	668	7e-127	393
EFW98765	2309|PHI:2309|BcatrB|Q9UW03|40559|Botrytis	48.6	819	381	11	329	1122	635	1438	0	782
EFW98765	2309|PHI:2309|BcatrB|Q9UW03|40559|Botrytis	45.16	279	149	1	52	330	186	460	1e-67	247
EFW98765	2309|PHI:2309|BcatrB|Q9UW03|40559|Botrytis	24.72	631	411	21	451	1039	69	677	1e-27	119
EFW98765	2309|PHI:2309|BcatrB|Q9UW03|40559|Botrytis	29.1	189	120	7	59	241	892	1072	4e-12	67.8
EFW98542	1877|PHI:1877|GzZC192|I1RPI7|5518|Gibberella	30.16	547	277	21	7	482	7	519	2e-53	190
EFW98769	2570|PHI:2570|CYB2|Q6FM61|5478|Candida	35.39	503	279	13	3	488	89	562	4e-95	301
EFW98967	401|PHI:401|SOD2|AAB86583|5476|Candida	52.8	214	97	3	17	226	20	233	4e-78	236
EFW98477	2490|PHI:2490|MCA|E9B636|5665|Leishmania	35.84	293	145	6	125	414	60	312	2e-49	173
EFW98986	1986|PHI:1986|GzZC301|I1RA77|5518|Gibberella	24.97	733	381	24	9	685	12	631	5e-41	157
EFW98672	387|PHI:387|UGD1|AAK95561|5207|Cryptococcus	51.34	335	142	5	3	326	99	423	2e-104	320
EFW98984	2909|PHI:2909|CYP51C|I1S2M5|5518|Fusarium	22.13	357	226	13	62	391	182	513	6e-13	67.4
EFW98606	3385	45.13	421	171	3	20	381	9	428	1e-118	353
EFW98768	2908|PHI:2908|CYP51B|I1RBR4|5518|Fusarium	26.52	264	173	10	187	431	236	497	6e-19	86.7
EFW98965	438|PHI:438|BcBOT1	30.86	486	312	6	18	501	25	488	4e-69	231
EFW98992	2042|PHI:2042|ABC3|Q3Y5V5|148305|Magnaporthe	34.87	390	239	8	511	889	820	1205	1e-64	234
EFW98992	2042|PHI:2042|ABC3|Q3Y5V5|148305|Magnaporthe	48.44	192	97	2	191	380	452	643	1e-47	181
EFW98992	2042|PHI:2042|ABC3|Q3Y5V5|148305|Magnaporthe	43.07	202	103	3	170	369	1128	1319	4e-39	154
EFW98992	2042|PHI:2042|ABC3|Q3Y5V5|148305|Magnaporthe	29.87	308	180	10	609	889	218	516	3e-22	100
EFW98814	2034|PHI:2034|MFP1|G4MZY1|148305|Magnaporthe	29.7	202	123	6	13	204	311	503	6e-13	66.6
EFX00264	3005|PHI:3005|ClpP|P63786|1280|Staphylococcus	48	50	26	0	46	95	25	74	5e-10	52.8
EFX00087	2638|PHI:2638|Ilv3A|Q4X099|746128|Aspergillus	74.65	564	133	3	29	582	40	603	0	837
EFX00519	465|PHI:465|KIN2|AAB63337|5270|Ustilago	36.41	357	181	10	354	692	1	329	3e-59	213
EFX00697	3310	44.44	756	318	16	28	686	1	751	0	595
EFX00411	2260|PHI:2260|PKS1|G8DNT0|45130|Cochliobolus	31.62	117	72	3	15	129	1902	2012	2e-09	55.5
EFX00204	22|PHI:22|UAC1|AAA57469|5270|Ustilago	36.79	106	66	1	175	279	1339	1444	7e-12	66.6
EFX00365	2808|PHI:2808|gas1|Q2KN79|59765|Fusarium	55.73	524	223	6	32	548	18	539	0	601
EFX00590	1423|PHI:1423|GzC2H091|I1S2R1|5518|Gibberella	42.53	87	49	1	393	478	478	564	3e-14	72.4
EFX00708	890|PHI:890|MGG_07015|EDJ98043|318829|Magnaporthe	23.3	309	212	10	200	486	255	560	3e-07	51.2
EFX00581	1566|PHI:1566|GzOB006|I1RC95|5518|Gibberella	44.68	329	181	1	131	458	59	387	4e-95	293
EFX00598	3138	82.02	573	65	3	1	537	1	571	0	961
EFX00263	2710|PHI:2710|mepB	74	400	104	0	74	473	1	400	0	618
EFX00050	24|PHI:24|Avenacinase	43.67	806	386	17	110	886	27	793	0	577
EFX00276	1398|PHI:1398|GzC2H061|I1RV65|5518|Gibberella	47.6	916	328	31	1	876	1	804	0	576
EFX00255	2693|PHI:2693|GcABC-G1|F0XP73|226899|Grosmannia	100	1539	0	0	1	1539	1	1539	0	3209
EFX00319	1234|PHI:1234|FGSG_07812|I1RV69|5518|Gibberella	72.18	1567	397	8	1	1566	1	1529	0	2312
EFX00319	1234|PHI:1234|FGSG_07812|I1RV69|5518|Gibberella	71.57	939	186	9	1639	2576	1535	2393	0	1362
EFX00181	465|PHI:465|KIN2|AAB63337|5270|Ustilago	31.36	236	131	8	365	598	127	333	2e-17	84.7
EFX00595	339|PHI:339|CLPT1|CAC41973|290576|Colletotrichum	32.6	181	100	5	6	184	11	171	2e-22	90.1
EFX00633	1566|PHI:1566|GzOB006|I1RC95|5518|Gibberella	46.42	293	157	0	169	461	89	381	1e-87	274
EFX00069	1203|PHI:1203|(Sc	65.75	181	62	0	71	251	117	297	3e-82	265
EFX00209	1161|PHI:1161|MgMfs1|A4ZGP3|54734|Mycosphaerella	24.3	498	309	20	49	519	86	542	2e-09	57.4
EFX00361	438|PHI:438|BcBOT1	28.14	469	310	10	56	507	39	497	5e-54	189
EFX00430	2115|PHI:2115|Annexin	57.74	407	143	4	64	467	53	433	3e-145	424
EFX00323	1888|PHI:1888|GzZC203|I1RHY2|5518|Gibberella	44.62	65	31	1	1	65	1	60	6e-10	58.9
EFX00506	1988|PHI:1988|GzZC303|I1RAP1|5518|Gibberella	57.93	599	185	10	1	572	1	559	0	647
EFX00234	1987|PHI:1987|GzZC302|I1RAP2|5518|Gibberella	46.15	1092	391	31	1	1065	1	922	0	860
EFX00507	2968|PHI:2968|Hxs1|J9VQA5|5207|Cryptococcus	25.73	482	317	13	4	468	6	463	1e-33	130
EFX00187	2656|PHI:2656|pmrF|D0ZPP5|90371|Salmonella	25.78	225	150	5	1	222	1	211	2e-21	88.6
EFX00372	805|PHI:805|MGG_00124|EDK03309|318829|Magnaporthe	46.79	1043	401	47	1	982	1	950	1e-169	522
EFX00404	1206|PHI:1206|(Sp	66.09	460	125	6	368	817	311	749	0	591
EFX00294	1221|PHI:1221|FGSG_03146|I1RJM9|5518|Gibberella	64.36	362	107	6	2	363	3	342	4e-153	452
EFX00468	511|PHI:511|CaNAG4|EAK93098|5476|Candida	24.37	197	144	5	56	249	119	313	2e-07	51.2
EFX00623	2844|PHI:2844|BRM2|O93802|5599|Alternaria	27.49	291	173	9	1	279	1	265	1e-12	64.3
EFX00285	2292|PHI:2292|aoxA|B0XVF7|746128|Aspergillus	52.82	337	135	5	494	823	33	352	2e-112	348
EFX00366	2059|PHI:2059|MgCRZ1|MGG_05133.5|148305|Magnaporthe	57.02	726	251	24	18	719	38	726	0	642
EFX00682	2895|PHI:2895|F-avi4330|B9JV05|373|Agrobacterium	29.06	203	120	7	26	221	1804	1989	4e-09	55.5
EFX00399	441|PHI:441|BTP1|CAE55153|40559|Botrytis	27.44	164	88	5	161	306	203	353	1e-09	56.2
EFX00462	1046|PHI:1046|CTB5|ABK64182|29003|Cercospora	40.32	186	104	2	40	219	4	188	2e-34	130
EFX00536	2315|PHI:2315|ChLae1|G4XKY9|5016|Cochliobolus	29.69	192	126	5	115	302	104	290	2e-22	92.4
EFX00260	4194	25	476	316	10	34	498	31	476	1e-39	149
EFX00609	2376|PHI:2376|DEP2|D2E9W7|29001|Alternaria	28.83	444	276	9	11	440	8	425	6e-51	180
EFX00162	1260|PHI:1260|FGSG_13944|I1RUC7|5518|Gibberella	30.05	183	114	5	570	740	428	608	1e-11	65.5
EFX00162	1260|PHI:1260|FGSG_13944|I1RUC7|5518|Gibberella	33.5	206	113	5	476	668	433	627	2e-11	65.5
EFX00192	2625|PHI:2625|purA|P65882|90371|Salmonella	41.55	426	239	6	4	423	6	427	5e-102	311
EFX00316	2020|PHI:2020|Tup1|XP_759427|5270|Ustilago	27.23	213	135	6	605	798	415	626	3e-18	87
EFX00316	2020|PHI:2020|Tup1|XP_759427|5270|Ustilago	24.92	297	152	9	529	796	470	724	4e-18	86.7
EFX00316	2020|PHI:2020|Tup1|XP_759427|5270|Ustilago	24.77	214	139	7	646	839	415	626	7e-12	66.2
EFX00384	1963|PHI:1963|GzZC278|I1RR01|5518|Gibberella	52.94	493	175	12	311	782	202	658	5e-153	463
EFX00384	1963|PHI:1963|GzZC278|I1RR01|5518|Gibberella	67	200	52	6	6	197	9	202	1e-69	241
EFX00086	267|PHI:267|MLT1|AAD51594|5476|Candida	27.8	1259	732	32	429	1591	401	1578	2e-124	427
EFX00636	2600|PHI:2600|GAT1|Q4WZG4|746128|Aspergillus	50.64	703	310	16	4	690	5	686	0	624
EFX00680	2968|PHI:2968|Hxs1|J9VQA5|5207|Cryptococcus	30.85	496	296	12	31	495	24	503	2e-64	218
EFX00456	2187|PHI:2187|MST12|G4N3L5|148305|Magnaporthe	72.4	703	136	12	1	653	21	715	0	954
EFX00168	124|PHI:124|INT1|AAA96019|5476|Candida	33.07	384	204	8	986	1366	1305	1638	5e-58	218
EFX00247	423|PHI:423|VAD1|AAV41010|5207|Cryptococcus	29.07	461	252	10	15	472	11	399	1e-42	160
EFX00513	901|PHI:901|um01886||5270|Ustilago	43.74	455	217	12	126	555	146	586	1e-113	351
EFX00291	2202|PHI:2202|PdeH|D0ERY7|148305|Magnaporthe	51.58	917	371	15	1	875	1	886	0	862
EFX00176	2552|PHI:2552|NOP4|Q4WNM3|746128|Aspergillus	49.02	459	181	8	373	819	323	740	7e-128	401
EFX00445	259|PHI:259|GPI7|AAL83897|5476|Candida	32.23	906	449	26	193	984	26	880	4e-140	443
EFX00288	1680|PHI:1680|GzMIZ002|I1S004|5518|Gibberella	22.18	284	156	12	202	427	878	1154	2e-12	67
EFX00059	2959|PHI:2959|mdh|C5BF98|67780|Edwardsiella	46.01	326	159	8	2	325	1	311	1e-81	251
EFX00745	3035	56.16	349	151	1	1	347	1	349	2e-146	419
EFX00089	2020|PHI:2020|Tup1|XP_759427|5270|Ustilago	44.53	649	281	15	17	593	87	728	1e-162	484
EFX00137	1258|PHI:1258|FGSG_10591|I1S5M8|5518|Gibberella	75.31	243	60	0	1	243	1	243	1e-135	400
EFX00455	1564|PHI:1564|GzOB004|Q4IPZ1|5518|Gibberella	40	55	32	1	26	79	15	69	8e-07	41.2
EFX00270	2528|PHI:2528|SLY1|Q4WYU7|746128|Aspergillus	21.82	440	281	12	42	449	60	468	1e-15	79
EFX00076	1328|PHI:1328|GzbZIP010|I1RRD2|5518|Gibberella	40.15	132	75	2	431	562	308	435	1e-17	84
EFX00639	1426|PHI:1426|GzC2H094|I1S4M4|5518|Gibberella	51.32	76	37	0	73	148	385	460	2e-21	95.9
EFX00587	2030|PHI:2030|TGL3-1|G4N492|148305|Magnaporthe	28.55	550	303	18	276	789	87	582	2e-53	198
EFX00124	2009|PHI:2009|HOS4|EDK06449|148305|Magnaporthe	50	368	151	7	1315	1652	1247	1611	7e-106	370
EFX00523	1519|PHI:1519|GzHOMEL018|I1RSV8|5518|Gibberella	41.04	558	228	18	15	564	73	537	1e-97	308
EFX00747	1795|PHI:1795|GzZC110|I1RSX8|5518|Gibberella	32.7	474	299	8	214	681	106	565	9e-77	266
EFX00747	1795|PHI:1795|GzZC110|I1RSX8|5518|Gibberella	66	50	16	1	6	54	9	58	2e-14	75.5
EFX00656	2248|PHI:2248|Als1|Q1L2E2|13684|Phaeosphaeria	65.58	642	170	11	1	626	1	607	0	845
EFX00734	1552|PHI:1552|GzMyb016|I1S0N5|5518|Gibberella	27.61	536	298	15	851	1378	181	634	3e-46	179
EFX00208	1588|PHI:1588|GzOB028|I1RSY2|5518|Gibberella	61.76	136	49	2	1	134	1	135	8e-53	164
EFX00414	1305|PHI:1305|GzbHLH006|I1RFN6|5518|Gibberella	45.11	133	54	4	343	467	337	458	1e-22	97.8
EFX00228	1529|PHI:1529|Gzscp|I1RS41|5518|Gibberella	70.57	1060	292	8	12	1066	10	1054	0	1493
EFX00505	2180|PHI:2180|MoTea4|G4N7A0|148305|Magnaporthe	54.23	721	239	18	384	1066	144	811	0	574
EFX00505	2180|PHI:2180|MoTea4|G4N7A0|148305|Magnaporthe	41.71	187	59	8	1	181	1	143	1e-15	79.3
EFX00102	882|PHI:882|MGG_04985|EDJ95433|318829|Magnaporthe	20.41	387	254	14	636	1013	441	782	1e-12	70.1
EFX00542	2042|PHI:2042|ABC3|Q3Y5V5|148305|Magnaporthe	29.15	446	289	11	250	678	883	1318	1e-47	180
EFX00542	2042|PHI:2042|ABC3|Q3Y5V5|148305|Magnaporthe	40.23	256	126	5	437	668	367	619	4e-43	166
EFX00146	1162|PHI:1162|BDM1|I1RJS3|5518|Gibberella	57	307	102	7	3	298	2	289	8e-109	319
EFX00034	311|PHI:311|MGB1|BAC01165|318829|Magnaporthe	94.9	314	16	0	1	314	1	314	0	632
EFX00725	12|PHI:12|HTS1|AAA33023|5017|Cochliobolus	26.13	333	187	15	267	572	1947	2247	1e-10	62
EFX00517	2248|PHI:2248|Als1|Q1L2E2|13684|Phaeosphaeria	27.54	443	265	13	180	600	142	550	1e-42	160
EFX00281	2121|PHI:2121|MST50p|MGG_05199|148305|Magnaporthe	74.4	500	114	9	1	497	1	489	0	732
EFX00610	1585|PHI:1585|GzOB025|I1RS43|5518|Gibberella	52.82	390	166	1	8	397	11	382	2e-147	426
EFX00115	2821|PHI:2821|SNF2|Q5ALP9|5476|Candida	33.99	559	302	13	1301	1835	736	1251	8e-81	293
EFX00559	1500|PHI:1500|GzHMG032|I1S2F2|5518|Gibberella	22.04	1021	658	38	1	938	206	1171	6e-27	116
EFX00559	1500|PHI:1500|GzHMG032|I1S2F2|5518|Gibberella	36.05	86	53	1	1102	1187	1371	1454	5e-11	64.3
EFX00628	2321|PHI:2321|SidI|Q4WR83|746128|Aspergillus	25.12	637	384	24	7	619	6	573	1e-25	108
EFX00713	2168|PHI:2168|Hypothetical	32.33	730	387	25	6	720	4	641	9e-57	214
EFX00713	2168|PHI:2168|Hypothetical	34.85	307	156	13	1015	1312	1128	1399	9e-29	122
EFX00498	286|PHI:286|CLC-A|AAO73005|5207|Cryptococcus	34	603	343	12	320	884	194	779	2e-97	325
EFX00498	286|PHI:286|CLC-A|AAO73005|5207|Cryptococcus	27.54	138	80	4	101	220	29	164	2e-10	61.6
EFX00394	1463|PHI:1463|GzCCAAT003|I1RFW6|5518|Gibberella	65.05	289	74	5	1	284	1	267	2e-117	340
EFX00166	1239|PHI:1239|FGSG_12149|I1RFC7|5518|Gibberella	64.01	289	88	4	85	373	66	338	1e-131	385
EFX00348	2382|PHI:2382|Upa2|Q6QIY0|5270|Ustilago	48.54	274	139	2	30	302	19	291	9e-95	285
EFX00670	2453|PHI:2453|Snt2|D9J222|61369|Fusarium	27.07	181	87	6	456	595	926	1102	1e-14	77
EFX00048	2895|PHI:2895|F-avi4330|B9JV05|373|Agrobacterium	29.59	338	218	7	148	470	139	471	1e-30	127
EFX00268	2976|PHI:2976|CgOPT1|C6ZRH8|29905|Colletotrichum	43.56	714	392	6	60	764	18	729	0	632
EFX00389	1722|PHI:1722|GzZC037|I1S8C0|5518|Gibberella	27.98	193	90	6	27	180	145	327	4e-09	57
EFX00300	1491|PHI:1491|GzHMG023|I1RST1|5518|Gibberella	56.32	815	289	10	29	802	9	797	0	747
EFX00686	2866|PHI:2866|ORF19.3625|Q59Y24|5476|Candida	42.62	61	23	4	900	948	265	325	6e-08	52.8
EFX00459	1432|PHI:1432|GzC2H100|I1S7Z8|5518|Gibberella	46.1	423	136	19	142	551	15	358	4e-84	266
EFX00383	315|PHI:315|PacC|AAM95700|5507|Fusarium	45.59	590	223	28	25	576	33	562	2e-119	369
EFX00592	66|PHI:66|CPP1|AAC05307|5476|Candida	24.8	246	113	6	315	550	405	588	1e-18	87.8
EFX00123	1253|PHI:1253|FGSG_11614|I1RS57|5518|Gibberella	50.1	1022	367	22	23	1036	19	905	0	848
EFX00123	1253|PHI:1253|FGSG_11614|I1RS57|5518|Gibberella	84.27	267	42	0	1124	1390	931	1197	3e-157	508
EFX00607	1458|PHI:1458|GzAra006|Q4I7F9|5518|Gibberella	25.97	462	220	10	176	613	311	674	4e-24	104
EFX00674	36|PHI:36|CPKA|AAA93199|318829|Magnaporthe	91.17	317	28	0	113	429	215	531	0	630
EFX00116	504|PHI:504|LEU2|CAA42366|4932|Saccharomyces	62.91	364	129	5	856	1219	6	363	1e-150	458
EFX00466	2106|PHI:2106|1-phosphatidylinositol-4,5-bisphosphate	41.52	761	319	18	40	765	34	703	1e-176	525
EFX00370	3786	25.37	205	147	4	91	295	59	257	1e-13	67.4
EFX00347	1772|PHI:1772|GzZC087|I1S053|5518|Gibberella	43.78	201	113	0	13	213	444	644	1e-43	167
EFX00127	2514|PHI:2514|PFS2|Q4X1Y0|746128|Aspergillus	52.74	493	179	9	84	549	1	466	2e-170	495
EFX00659	4194	28.54	480	294	14	93	538	16	480	2e-51	184
EFX00727	1380|PHI:1380|GzC2H043|I1RRG4|5518|Gibberella	41.58	493	213	17	61	520	50	500	1e-114	350
EFX00477	1414|PHI:1414|GzC2H081|I1RZL0|5518|Gibberella	48.75	80	40	1	640	718	23	102	6e-14	72.4
EFX00723	2282|PHI:2282|MeaB|J9MHC1|5507|Fusarium	51.52	427	118	17	1	355	1	410	3e-99	301
EFX00147	2216|PHI:2216|PemG1|A0N0D1|148305|Magnaporthe	53.66	246	92	8	63	294	2	239	4e-43	153
EFX00293	1229|PHI:1229|FGSG_02153|I1RRB9|5518|Gibberella	51.16	516	144	19	30	508	52	496	1e-129	396
EFX00293	1229|PHI:1229|FGSG_02153|I1RRB9|5518|Gibberella	73.17	82	22	0	582	663	486	567	4e-32	129
EFX00334	2201|PHI:2201|PdeL|D0ERY8|148305|Magnaporthe	53.59	627	232	15	4	614	2	585	0	591
EFX00144	304|PHI:304|GzCPS1|AAP12366|5518|Fusarium	71.17	1741	422	19	161	1873	1	1689	0	2489
EFX00649	423|PHI:423|VAD1|AAV41010|5207|Cryptococcus	32.86	353	228	5	273	624	45	389	2e-56	207
EFX00177	2140|PHI:2140|MoVam7|XP_001907727.1|148305|Magnaporthe	49.87	387	142	4	1	348	1	374	1e-106	318
EFX00470	1391|PHI:1391|GzC2H054|I1RU55|5518|Gibberella	56.04	91	40	0	195	285	617	707	3e-26	107
EFX00679	1662|PHI:1662|GzCCHC002|I1REJ1|5518|Gibberella	34.32	437	276	5	49	482	643	1071	2e-83	283
EFX00489	2315|PHI:2315|ChLae1|G4XKY9|5016|Cochliobolus	26.71	277	179	6	60	329	31	290	5e-29	112
EFX00060	2425|PHI:2425|PKS2|Q6RKG2|5016|Cochliobolus	39.39	1282	730	23	4	1273	2	1248	0	888
EFX00060	2425|PHI:2425|PKS2|Q6RKG2|5016|Cochliobolus	33.15	893	552	16	1347	2230	1284	2140	1e-113	401
EFX00537	404|PHI:404|PTH11|AAD30436|318829|Magnaporthe	21.37	248	189	3	41	287	125	367	7e-17	79.7
EFX00392	1260|PHI:1260|FGSG_13944|I1RUC7|5518|Gibberella	34.88	129	80	3	9	135	465	591	1e-07	46.6
EFX00298	2315|PHI:2315|ChLae1|G4XKY9|5016|Cochliobolus	35.63	247	145	7	39	277	52	292	1e-40	142
EFX00070	1555|PHI:1555|GzMyb019|I1RDG6|5518|Gibberella	23.93	305	210	5	44	327	74	377	9e-21	92.4
EFX00596	1790|PHI:1790|GzZC105|I1RVT7|5518|Gibberella	62.26	416	150	1	543	958	439	847	0	580
EFX00596	1790|PHI:1790|GzZC105|I1RVT7|5518|Gibberella	37.67	292	148	6	193	480	170	431	3e-41	162
EFX00407	404|PHI:404|PTH11|AAD30436|318829|Magnaporthe	23.24	185	107	6	119	286	191	357	2e-07	50.1
EFX00158	716|PHI:716|ZEB1|ABB90284|5518|Fusarium	34.55	165	95	5	74	228	130	291	2e-14	73.2
EFX00233	2315|PHI:2315|ChLae1|G4XKY9|5016|Cochliobolus	32.55	298	178	6	170	464	14	291	1e-42	152
EFX00356	191|PHI:191|TOM1|AAB08446|39703|Septoria	30.64	483	247	16	1054	1473	48	505	1e-44	172
EFX00356	191|PHI:191|TOM1|AAB08446|39703|Septoria	32.9	155	96	3	1625	1771	513	667	8e-18	87.4
EFX00151	211|PHI:211|CaTUP1|AAB63195|5476|Candida	35.56	315	171	7	691	975	198	510	2e-43	164
EFX00151	211|PHI:211|CaTUP1|AAB63195|5476|Candida	31.11	270	158	6	736	979	201	468	2e-29	121
EFX00151	211|PHI:211|CaTUP1|AAB63195|5476|Candida	35.03	177	99	3	688	848	333	509	2e-21	96.7
EFX00611	2315|PHI:2315|ChLae1|G4XKY9|5016|Cochliobolus	33.56	289	185	5	37	318	2	290	2e-48	164
EFX00362	424|PHI:424|PCK1|EAL19243|5207|Cryptococcus	62.16	547	195	7	53	590	7	550	0	707
EFX00410	3381	54.46	538	211	6	60	580	163	683	0	548
EFX00301	2256|PHI:2256|Xdh1|Q0UA24|13684|Phaeosphaeria	29.59	267	169	7	10	268	18	273	6e-25	101
EFX00529	1373|PHI:1373|GzC2H036|I1RN20|5518|Gibberella	77.34	128	29	0	566	693	222	349	7e-66	222
EFX00051	2604|PHI:2604|Rim13|Q4PCT8|5270|Ustilago	26.83	861	399	29	50	757	95	877	4e-57	211
EFX00085	4559	36.8	712	392	13	171	840	171	866	5e-121	390
EFX00312	2490|PHI:2490|MCA|E9B636|5665|Leishmania	32.05	312	151	6	3	313	61	312	3e-37	140
EFX00431	1228|PHI:1228|FGSG_07745|I1RR00|5518|Gibberella	50.99	504	192	9	1	504	97	545	3e-165	481
EFX00317	256|PHI:256|GAS1|AAK52794|318829|Magnaporthe	33.2	241	145	8	16	251	17	246	3e-28	107
EFX00065	2083|PHI:2083|Moatg17|MGG_07667|148305|Magnaporthe	48.71	466	206	6	65	529	32	465	4e-125	391
EFX00624	2315|PHI:2315|ChLae1|G4XKY9|5016|Cochliobolus	26.64	289	154	10	95	326	3	290	8e-26	102
EFX00337	2309|PHI:2309|BcatrB|Q9UW03|40559|Botrytis	29.04	551	340	19	4	531	810	1332	6e-51	189
EFX00337	2309|PHI:2309|BcatrB|Q9UW03|40559|Botrytis	23.98	563	393	14	13	545	114	671	8e-38	147
EFX00154	2644|PHI:2644|thioredoxin	31.03	87	48	2	182	268	20	94	2e-07	47.8
EFX00504	131|PHI:131|TRI12|AAD12756|5514|Fusarium	25.98	585	408	11	17	589	7	578	2e-55	196
EFX00622	881|PHI:881|MGG_04556|EDJ96020|318829|Magnaporthe	29.19	322	220	4	13	330	21	338	6e-35	129
EFX00667	2835|PHI:2835|RED2|C3JXE8|5016|Cochliobolus	39.51	205	121	2	38	240	57	260	4e-43	149
EFX00413	244|PHI:244|CLAP1|AAN62846|290576|Colletotrichum	25.33	825	505	26	70	829	311	1089	1e-46	177
EFX00491	2378|PHI:2378|DEP4|D2E9W9|29001|Alternaria	22.76	391	248	17	26	382	3	373	3e-07	50.4
EFX00374	2315|PHI:2315|ChLae1|G4XKY9|5016|Cochliobolus	34.01	294	180	9	78	363	3	290	2e-49	168
EFX00406	3381	22.25	472	313	8	64	531	214	635	4e-14	72.4
EFX00064	2570|PHI:2570|CYB2|Q6FM61|5478|Candida	41.06	470	255	10	19	472	94	557	2e-115	354
EFX00605	1783|PHI:1783|GzZC098|I1S2C5|5518|Gibberella	30.47	430	253	13	426	837	271	672	3e-36	143
EFX00449	1651|PHI:1651|GzWing023|I1S0U2|5518|Gibberella	46.32	421	218	5	1	416	1	418	2e-128	379
EFX00211	510|PHI:510|CaNAG3|EAK93097|5476|Candida	59.17	480	190	4	130	604	83	561	0	555
EFX00315	716|PHI:716|ZEB1|ABB90284|5518|Fusarium	51.28	548	267	0	12	559	16	563	0	586
EFX00072	598|PHI:598|THIOL|ABB55459|5022|Leptosphaeria	50.27	374	156	6	66	439	15	358	6e-115	343
EFX00602	2368|PHI:2368|bac|Q9P880|40559|Botrytis	25.66	265	171	6	591	847	857	1103	7e-17	84
EFX00742	1992|PHI:1992|GzZC307|I1R983|5518|Gibberella	30.28	251	152	8	241	484	421	655	5e-17	82
EFX00614	2315|PHI:2315|ChLae1|G4XKY9|5016|Cochliobolus	34.95	289	181	5	65	346	2	290	1e-50	173
EFX00210	2315|PHI:2315|ChLae1|G4XKY9|5016|Cochliobolus	32.14	140	93	2	44	181	140	279	7e-19	79.7
EFX00479	438|PHI:438|BcBOT1	25.05	503	282	22	1	464	17	463	7e-22	95.9
EFX00311	1051|PHI:1051|CTB3|ABC79591|29003|Cercospora	31.56	225	130	4	2	204	206	428	4e-32	121
EFX00259	1051|PHI:1051|CTB3|ABC79591|29003|Cercospora	37.25	102	64	0	70	171	64	165	1e-16	76.3
EFX00709	2654|PHI:2654|DUR1,2|Q59VF3|5476|Candida	32.09	508	271	8	179	682	615	1052	2e-63	238
EFX00560	2038|PHI:2038|Mir1|MGG_02370|148305|Magnaporthe	25.95	289	187	7	33	314	39	307	8e-18	79.7
EFX00589	211|PHI:211|CaTUP1|AAB63195|5476|Candida	36.9	187	97	6	298	466	263	446	8e-21	93.6
EFX00589	211|PHI:211|CaTUP1|AAB63195|5476|Candida	24.12	369	185	14	293	626	201	509	3e-15	75.9
EFX00646	1878|PHI:1878|GzZC193|I1RPF6|5518|Gibberella	46.53	432	212	8	4	431	204	620	3e-121	373
EFX00437	2522|PHI:2522|SPE2|Q4WEN8|746128|Aspergillus	43.9	533	195	16	1	472	1	490	1e-131	391
EFX00510	1625|PHI:1625|GzOpi|I1RXB9|5518|Gibberella	55.47	256	88	4	268	523	210	439	3e-80	260
EFX00510	1625|PHI:1625|GzOpi|I1RXB9|5518|Gibberella	50.67	75	34	2	79	152	93	165	2e-12	67
EFX00299	2521|PHI:2521|GUS1|Q4WEM7|746128|Aspergillus	58.75	623	244	4	16	637	103	713	0	730
EFX00678	1326|PHI:1326|GzbZIP008|I1RPG1|5518|Gibberella	40.87	619	219	22	95	650	75	609	6e-85	279
EFX00556	541|PHI:541|LIP1|AAU87359|332648|Botrytis	50.19	524	217	5	1	485	55	573	0	539
EFX00133	2819|PHI:2819|CaEss1|G1UA02|5476|Candida	45.09	173	91	2	9	180	6	175	3e-50	160
EFX00463	2128|PHI:2128|MoHox1|MGG_04853|148305|Magnaporthe	68.75	640	153	13	2	637	27	623	0	818
EFX00376	405|PHI:405|PDE1|AAK07740|318829|Magnaporthe	45.4	1436	652	24	256	1649	43	1388	0	1182
EFX01688	2183|PHI:2183|CPXB|EHA48040.1|148305|Magnaporthe	63.46	791	276	7	8	796	7	786	0	980
EFX01567	922|PHI:922|um03615||5270|Ustilago	28.08	609	375	20	9	573	84	673	1e-52	189
EFX01755	106|PHI:106|CAT1|AAC39448|5476|Candida	38.67	300	166	5	81	378	160	443	6e-65	225
EFX01755	106|PHI:106|CAT1|AAC39448|5476|Candida	59.06	127	49	1	6	132	5	128	4e-38	147
EFX01782	3214	38.89	72	43	1	37	108	26	96	4e-08	46.6
EFX01572	2270|PHI:2270|Mpd1|Q0U6E8|13684|Phaeosphaeria	26.36	220	130	10	194	403	118	315	5e-13	67.8
EFX01657	1662|PHI:1662|GzCCHC002|I1REJ1|5518|Gibberella	30.12	83	56	2	1	81	782	864	9e-07	43.5
EFX01615	2058|PHI:2058|LHS1|MGG_06648.5|148305|Magnaporthe	28.36	275	166	4	147	399	150	415	2e-20	92.8
EFX01790	2195|PHI:2195|MoRgs4|XP_368254|148305|Magnaporthe	56.9	1471	399	35	6	1462	7	1256	0	1402
EFX01803	4194	28.21	514	298	16	18	489	18	502	3e-51	182
EFX01765	267|PHI:267|MLT1|AAD51594|5476|Candida	36.36	88	56	0	88	175	1362	1449	2e-11	63.2
EFX01785	2837|PHI:2837|OXI1|D2SZX7|5016|Cochliobolus	29.55	176	114	5	106	279	63	230	5e-16	72.8
EFX01600	115|PHI:115|PGX1|AAC26146|5017|Cochliobolus	23.4	265	163	6	158	383	150	413	2e-10	60.1
EFX01597	2130|PHI:2130|MoHox4|MGG_06285|148305|Magnaporthe	32.33	266	161	9	74	328	71	328	2e-30	121
EFX01792	922|PHI:922|um03615||5270|Ustilago	28.75	626	359	20	11	609	83	648	6e-58	206
EFX01843	265|PHI:265|MET3|AAL92174|5207|Cryptococcus	64.03	581	198	4	1	570	1	581	0	761
EFX01632	1404|PHI:1404|GzC2H067|I1RWH6|5518|Gibberella	53.1	113	48	3	692	800	529	640	1e-35	140
EFX01648	1589|PHI:1589|GzOB029|I1RWH5|5518|Gibberella	48.88	268	104	6	4	270	7	242	3e-75	231
EFX01625	2244|PHI:2244|37865|gi|46099354|5270|Ustilago	23.69	249	146	5	134	381	4	209	2e-15	75.1
EFX01625	2244|PHI:2244|37865|gi|46099354|5270|Ustilago	32.39	71	44	2	457	523	213	283	4e-07	49.7
EFX01685	2540|PHI:2540|IPP1|Q4WX65|746128|Aspergillus	81.06	301	57	0	1443	1743	95	395	3e-171	525
EFX01629	1257|PHI:1257|FGSG_13509|I1RSK0|5518|Gibberella	60.27	677	211	9	34	698	23	653	0	816
EFX01595	3270	83.22	286	26	3	1	267	1	283	7e-167	465
EFX01659	1458|PHI:1458|GzAra006|Q4I7F9|5518|Gibberella	67.95	621	176	9	126	732	108	719	0	832
EFX01799	1348|PHI:1348|GzC2H008|I1RC07|5518|Gibberella	60.33	983	263	25	1	969	1	870	0	964
EFX01719	1566|PHI:1566|GzOB006|I1RC95|5518|Gibberella	47.23	307	162	0	116	422	70	376	2e-102	312
EFX01696	2545|PHI:2545|TIF35|Q4X1I3|746128|Aspergillus	33.68	95	54	2	4	95	201	289	6e-08	48.5
EFX01711	2822|PHI:2822|Cxt1p|Q5K8R6|5207|Cryptococcus	25	528	352	16	160	660	167	677	1e-37	146
EFX01642	455|PHI:455|CAP59|AAC13946|5207|Cryptococcus	27.42	299	181	9	52	338	94	368	1e-25	105
EFX01662	186|PHI:186|RIM8|AAD51715|5476|Candida	25.56	360	192	11	544	890	301	597	5e-17	83.2
EFX01665	1632|PHI:1632|GzWing004|I1RBU0|5518|Gibberella	50.07	709	230	24	5	694	6	609	0	591
EFX01574	2309|PHI:2309|BcatrB|Q9UW03|40559|Botrytis	59.37	1452	518	8	59	1506	56	1439	0	1753
EFX01810	2976|PHI:2976|CgOPT1|C6ZRH8|29905|Colletotrichum	34.34	731	434	14	17	706	2	727	2e-135	420
EFX01808	541|PHI:541|LIP1|AAU87359|332648|Botrytis	33.7	546	286	20	20	524	27	537	3e-67	228
EFX01728	510|PHI:510|CaNAG3|EAK93097|5476|Candida	25.67	409	272	12	692	1092	142	526	8e-24	104
EFX01598	1662|PHI:1662|GzCCHC002|I1REJ1|5518|Gibberella	24.65	434	275	16	36	432	613	1031	2e-20	91.7
EFX01578	2731|PHI:2731|VdSge1|G2XD29|27337|Verticillium	24.15	414	270	11	19	415	15	401	2e-26	111
EFX01741	1662|PHI:1662|GzCCHC002|I1REJ1|5518|Gibberella	34.33	434	277	3	48	479	644	1071	3e-83	282
EFX01710	1963|PHI:1963|GzZC278|I1RR01|5518|Gibberella	29.72	286	183	5	271	546	192	469	8e-27	113
EFX01710	1963|PHI:1963|GzZC278|I1RR01|5518|Gibberella	28.66	157	75	6	8	133	2	152	3e-09	57.4
EFX01699	441|PHI:441|BTP1|CAE55153|40559|Botrytis	32.17	230	142	3	104	329	116	335	7e-29	113
EFX01702	2219|PHI:2219|don1|XP_758565|5270|Ustilago	23.13	268	177	7	1468	1716	346	603	7e-07	52
EFX01835	1938|PHI:1938|GzZC253|I1RMZ4|5518|Gibberella	24.36	468	307	8	1119	1571	162	597	1e-35	145
EFX01743	2427|PHI:2427|FgVELB|I1RCN9|5518|Gibberella	69.57	138	32	2	255	392	3	130	3e-57	184
EFX01608	1489|PHI:1489|GzHMG021|I1RSJ5|5518|Gibberella	39.34	483	214	15	1	474	1	413	2e-79	258
EFX01744	551|PHI:551|HIK1|BAB40947|318829|Magnaporthe	79.47	1286	231	11	35	1307	34	1299	0	2013
EFX01651	4506	75.38	780	182	6	584	1354	455	1233	0	1258
EFX01651	4506	47.88	449	157	16	4	424	3	402	2e-80	286
EFX01709	1552|PHI:1552|GzMyb016|I1S0N5|5518|Gibberella	43.95	496	247	8	440	933	168	634	2e-114	390
EFX01584	2866|PHI:2866|ORF19.3625|Q59Y24|5476|Candida	42.62	61	22	4	503	553	269	326	3e-09	56.2
EFX01786	2005|PHI:2005|HOS2|EDK04649|148305|Magnaporthe	74.25	497	126	2	90	585	1	496	0	802
EFX01682	2067|PHI:2067|ABC4|MGG_00937|148305|Magnaporthe	23.36	214	147	4	337	535	1275	1486	1e-09	58.9
EFX01610	1260|PHI:1260|FGSG_13944|I1RUC7|5518|Gibberella	31.03	203	135	3	603	805	454	651	4e-18	86.3
EFX01610	1260|PHI:1260|FGSG_13944|I1RUC7|5518|Gibberella	33.33	174	106	2	566	739	483	646	1e-16	81.6
EFX01610	1260|PHI:1260|FGSG_13944|I1RUC7|5518|Gibberella	33.06	242	133	7	654	892	421	636	6e-16	79.3
EFX01610	1260|PHI:1260|FGSG_13944|I1RUC7|5518|Gibberella	32.81	192	125	2	569	760	453	640	2e-15	77.8
EFX01610	1260|PHI:1260|FGSG_13944|I1RUC7|5518|Gibberella	31.16	199	125	6	667	863	452	640	3e-13	70.5
EFX01653	1279|PHI:1279|FGSG_12132|I1RU59|5518|Gibberella	26.99	489	287	19	16	443	124	603	8e-33	130
EFX01599	1279|PHI:1279|FGSG_12132|I1RU59|5518|Gibberella	30.53	262	153	10	199	450	276	518	6e-26	112
EFX01613	1302|PHI:1302|GzbHLH003|I1RC37|5518|Gibberella	46.98	464	165	14	1	457	1	390	6e-98	310
EFX01750	1260|PHI:1260|FGSG_13944|I1RUC7|5518|Gibberella	28.9	173	98	5	72	234	449	606	3e-07	50.1
EFX01701	1555|PHI:1555|GzMyb019|I1RDG6|5518|Gibberella	52.84	511	234	3	103	607	36	545	0	570
EFX01593	2184|PHI:2184|HTF1|MGG_00184|148305|Magnaporthe	37.8	701	340	27	1	614	1	692	3e-99	318
EFX01784	1198|PHI:1198|(Sc	56.13	1370	474	16	33	1379	62	1327	0	1509
EFX01832	786|PHI:786|MGG_04538|EDK05615|318829|Magnaporthe	29.29	297	113	13	24	317	255	457	3e-18	84.7
EFX01779	2256|PHI:2256|Xdh1|Q0UA24|13684|Phaeosphaeria	26.67	330	197	11	17	309	29	350	3e-21	92.8
EFX01822	4506	25	612	335	20	141	697	612	1154	2e-37	149
EFX01838	862|PHI:862|ClaSSD1|BAE66713|5462|Colletotrichum	28.1	790	475	25	256	979	11	773	1e-64	233
EFX01775	1462|PHI:1462|GzCCAAT002|I1RC79|5518|Gibberella	48.99	198	96	3	142	336	2	197	5e-47	164
EFX01666	441|PHI:441|BTP1|CAE55153|40559|Botrytis	27.68	289	183	10	14	283	15	296	3e-18	83.2
EFX01664	2008|PHI:2008|HST1|EDJ98541|148305|Magnaporthe	29.75	158	91	7	107	262	198	337	1e-13	71.2
EFX01693	875|PHI:875|MGG_04587|EDK05593|318829|Magnaporthe	46.39	983	422	25	22	960	42	963	0	811
EFX01730	2351|PHI:2351|AMT1|XP_381310|5518|Gibberella	79.88	343	69	0	2	344	3	345	0	588
EFX01577	2550|PHI:2550|NOB1|Q4WES1|746128|Aspergillus	47.62	441	203	7	45	470	8	435	2e-126	376
EFX01752	792|PHI:792|MGG_09250|EDJ97946|318829|Magnaporthe	45.33	375	189	6	143	514	202	563	9e-112	346
EFX01766	4493	58.63	510	174	8	8	516	7	480	0	561
EFX01825	510|PHI:510|CaNAG3|EAK93097|5476|Candida	24.78	456	297	12	89	535	125	543	3e-27	113
EFX01796	1413|PHI:1413|GzC2H080|I1RZD4|5518|Gibberella	31.25	736	422	21	16	697	59	764	3e-92	310
EFX01607	2240|PHI:2240|Srt1|Q4PBY9|5270|Ustilago	26.35	482	332	7	133	604	46	514	2e-36	140
EFX01736	3236	26.45	431	250	15	63	468	129	517	3e-28	115
EFX01695	2032|PHI:2032|VTL1|G4NGA7|148305|Magnaporthe	25.77	520	330	13	35	537	46	526	2e-41	154
EFX01604	1792|PHI:1792|GzZC107|I1RVS7|5518|Gibberella	31.91	658	342	23	48	632	113	737	4e-77	269
EFX01742	1459|PHI:1459|GzAra007|I1RYE2|5518|Gibberella	50.28	181	79	4	7	178	15	193	2e-53	172
EFX01635	393|PHI:393|CpCOT1|CAH04535|5111|Claviceps	74.21	694	113	12	1	667	1	655	0	1006
EFX01789	270|PHI:270|RHO1|BAA24262|5476|Candida	61.78	191	73	0	11	201	8	198	1e-79	237
EFX01733	358|PHI:358|ILV2|AAR29084|5207|Cryptococcus	61.38	567	205	7	16	573	145	706	0	683
EFX01579	1797|PHI:1797|GzZC112|I1RSR1|5518|Gibberella	42.24	322	168	4	249	560	237	550	6e-85	283
EFX01628	2322|PHI:2322|SidH|Q4WF54|746128|Aspergillus	28.24	255	161	11	396	640	24	266	3e-17	80.1
EFX01740	2329|PHI:2329|CTB4|A0ST42|29003|Cercospora	34.05	464	276	8	13	450	49	508	2e-82	264
EFW99671	220|PHI:220|MAN1|AAG10203|5207|Cryptococcus	41.5	253	127	7	53	303	199	432	1e-50	174
EFW99667	339|PHI:339|CLPT1|CAC41973|290576|Colletotrichum	30.85	94	56	4	18	104	11	102	1e-08	50.1
EFW99669	1175|PHI:1175|(Sc	76.62	432	83	4	2	422	29	453	0	662
EFW99660	2968|PHI:2968|Hxs1|J9VQA5|5207|Cryptococcus	21.69	438	291	11	405	828	53	452	6e-22	97.8
EFW99661	1296|PHI:1296|GzAPSES004|I1S0Z2|5518|Gibberella	56.65	519	212	8	1	513	160	671	0	589
EFX03414	2336|PHI:2336|NIA1|O00101|13684|Stagonospora	28	75	53	1	4	78	536	609	2e-08	49.3
EFX03394	2996|PHI:2996|MGG_06507.6|G4N6W9|148305|Magnaporthe	64.76	437	129	15	5	425	50	477	4e-163	469
EFX03400	134|PHI:134|AKT2|BAA36589|5599|Alternaria	26.04	288	179	8	132	414	1	259	4e-24	98.6
EFX03380	650|PHI:650|TPS1|ABG25558|332648|Botrytis	67.87	470	147	2	13	480	9	476	0	699
EFX03355	1605|PHI:1605|GzOB046|I1S216|5518|Gibberella	48.6	537	192	8	83	573	36	534	7e-163	477
EFX03404	2400|PHI:2400|Fgp2|I1S215|5518|Gibberella	50.09	549	144	20	8	554	1	421	3e-128	383
EFX03366	1652|PHI:1652|GzWing024|I1S219|5518|Gibberella	87.01	77	10	0	15	91	13	89	3e-44	147
EFX03391	1378|PHI:1378|GzC2H041|I1RQG9|5518|Gibberella	39.01	992	338	38	1	934	1	783	1e-140	440
EFX03379	2570|PHI:2570|CYB2|Q6FM61|5478|Candida	41.58	101	55	3	5	101	90	190	7e-13	68.6
EFX03398	1555|PHI:1555|GzMyb019|I1RDG6|5518|Gibberella	27.42	485	313	12	37	496	74	544	2e-47	176
EFX03361	544|PHI:544|BCMFS1|AAF64435|332648|Botrytis	28.98	176	106	7	288	459	95	255	4e-08	53.9
EFX03359	552|PHI:552|BcLCC2|AAK77953|40559|Botrytis	32.05	443	229	13	286	692	175	581	4e-60	211
EFX03359	552|PHI:552|BcLCC2|AAK77953|40559|Botrytis	38.78	98	54	5	197	292	18	111	2e-08	54.7
EFX03364	1500|PHI:1500|GzHMG032|I1S2F2|5518|Gibberella	66.78	1517	427	12	5	1494	4	1470	0	1964
EFX03337	423|PHI:423|VAD1|AAV41010|5207|Cryptococcus	76.12	402	95	1	20	420	9	410	0	654
EFX03339	2968|PHI:2968|Hxs1|J9VQA5|5207|Cryptococcus	29.87	529	328	9	32	554	8	499	2e-75	248
EFX03346	2553|PHI:2553|VPS4|Q5AG40|5476|Candida	63.39	437	143	3	4	426	5	438	0	572
EFX03341	144|PHI:144|CHT42|AAC05829|29875|Trichoderma	47.96	392	194	3	7	392	39	426	5e-129	380
EFX03415	4194	38.78	526	288	10	25	526	5	520	3e-125	378
EFX03396	2215|PHI:2215|BIM1|G4N983|148305|Magnaporthe	50.6	670	295	12	1	647	1	657	0	613
EFX03396	2215|PHI:2215|BIM1|G4N983|148305|Magnaporthe	50.07	709	208	12	791	1359	1379	2081	0	600
EFX03396	2215|PHI:2215|BIM1|G4N983|148305|Magnaporthe	45.31	128	70	0	661	788	1042	1169	7e-24	107
EFX03375	1297|PHI:1297|GzAT001|I1RPU1|5518|Gibberella	61.4	228	80	8	1	226	1	222	1e-66	221
EFX03412	404|PHI:404|PTH11|AAD30436|318829|Magnaporthe	23.78	164	122	2	15	175	106	269	6e-07	47.8
EFX03370	922|PHI:922|um03615||5270|Ustilago	37.24	615	316	19	1	571	83	671	1e-99	318
EFX03113	2060|PHI:2060|MgLig4|B6ZH51|148305|Magnaporthe	58.14	1013	404	10	8	1017	4	999	0	1133
EFX02868	2491|PHI:2491|FgPTC1|I1RJS9|5518|Gibberella	61.99	542	140	11	82	601	42	539	0	593
EFX03292	1902|PHI:1902|GzZC217|I1RJS7|5518|Gibberella	60.7	1033	336	20	4	1006	3	995	0	1182
EFX02712	519|PHI:519|CHM1|AAL15449|318829|Magnaporthe	75.9	834	158	13	22	843	54	856	0	1191
EFX02603	3281	26.73	333	212	11	43	360	4	319	6e-22	92.8
EFX03285	2315|PHI:2315|ChLae1|G4XKY9|5016|Cochliobolus	32.34	303	173	11	119	401	1	291	1e-32	123
EFX02669	72|PHI:72|SAP2|AAM21050|5476|Candida	37.57	378	185	17	48	407	49	393	2e-54	187
EFX02928	2119|PHI:2119|MST11p|MGG_14847|148305|Magnaporthe	77.37	937	181	16	1	928	1	915	0	1414
EFX02808	1584|PHI:1584|GzOB024|I1RS24|5518|Gibberella	86.22	254	35	0	1	254	1	254	2e-161	449
EFX03295	2543|PHI:2543|GCD6|Q4WLS1|746128|Aspergillus	23.16	380	233	12	1	338	88	450	6e-11	61.2
EFX02818	2101|PHI:2101|Vacuolar	58.6	471	163	7	11	452	27	494	0	525
EFX02744	1593|PHI:1593|GzOB033|I1RWS6|5518|Gibberella	45.65	184	84	3	350	519	10	191	4e-46	167
EFX03144	2488|PHI:2488|Man1|G4ND25|148305|Magnaporthe	60.19	520	195	4	10	521	13	528	0	615
EFX03000	2558|PHI:2558|DUR31|Q59P00|5476|Candida	51.45	482	205	7	14	486	58	519	2e-160	467
EFX03016	2544|PHI:2544|PAB1|Q4WK03|746128|Aspergillus	26.07	257	168	7	644	882	53	305	1e-18	89
EFX03016	2544|PHI:2544|PAB1|Q4WK03|746128|Aspergillus	21.7	318	173	7	644	885	141	458	8e-11	63.5
EFX02846	785|PHI:785|MGG_04128|EDJ99431|318829|Magnaporthe	41.67	528	250	11	21	505	35	547	4e-135	404
EFX03265	2844|PHI:2844|BRM2|O93802|5599|Alternaria	30	280	158	8	3	267	7	263	5e-28	107
EFX02813	1753|PHI:1753|GzZC068|I1RZN4|5518|Gibberella	56.93	924	288	17	1	891	1	847	0	978
EFX03197	1662|PHI:1662|GzCCHC002|I1REJ1|5518|Gibberella	30.43	447	296	6	66	507	637	1073	8e-66	232
EFX02725	2968|PHI:2968|Hxs1|J9VQA5|5207|Cryptococcus	31.67	502	326	8	38	537	4	490	5e-89	285
EFX03330	2115|PHI:2115|Annexin	25.79	318	208	9	371	685	127	419	3e-16	79.3
EFX03015	3089	27.44	164	104	4	43	205	852	1001	6e-09	56.2
EFX03206	2601|PHI:2601|Asc1|P83774|746128|Aspergillus	64.54	313	107	3	3	314	5	314	7e-149	423
EFX02745	1318|PHI:1318|GzBrom003|I1RZM2|5518|Gibberella	37.35	340	141	5	63	397	21	293	2e-61	201
EFX02866	1936|PHI:1936|GzZC251|I1RFG1|5518|Gibberella	33.55	620	331	11	14	625	8	554	1e-100	328
EFX02981	3629	27.7	343	185	16	132	430	15	338	8e-10	58.5
EFX02575	262|PHI:262|MAD2|EAK94586|5476|Candida	40.81	223	104	5	15	231	10	210	4e-54	174
EFX03012	387|PHI:387|UGD1|AAK95561|5207|Cryptococcus	49.89	437	198	6	72	503	2	422	4e-137	410
EFX03261	2315|PHI:2315|ChLae1|G4XKY9|5016|Cochliobolus	34.57	269	166	6	87	349	15	279	4e-46	167
EFX03061	2968|PHI:2968|Hxs1|J9VQA5|5207|Cryptococcus	32.89	523	319	9	18	537	9	502	5e-100	313
EFX02714	784|PHI:784|MGG_00056|EDK03390|318829|Magnaporthe	32.05	259	163	8	10	261	19	271	6e-29	110
EFX03235	1992|PHI:1992|GzZC307|I1R983|5518|Gibberella	26.32	266	158	9	195	441	419	665	3e-15	75.9
EFX03077	2240|PHI:2240|Srt1|Q4PBY9|5270|Ustilago	24.75	493	333	12	74	551	24	493	4e-27	112
EFX03318	1458|PHI:1458|GzAra006|Q4I7F9|5518|Gibberella	35.22	423	210	10	137	520	308	705	1e-65	226
EFX02692	3455	28.99	507	274	15	590	1081	20	455	1e-31	128
EFX02810	812|PHI:812|MGG_10702|EDJ94108|318829|Magnaporthe	27.56	381	252	9	44	421	12	371	1e-35	134
EFX02993	1941|PHI:1941|GzZC256|I1RGD9|5518|Gibberella	27.15	722	390	22	41	700	38	685	2e-70	247
EFX02800	3381	34.48	464	291	8	154	613	188	642	2e-72	246
EFX02668	2244|PHI:2244|37865|gi|46099354|5270|Ustilago	41.74	345	191	6	155	493	5	345	8e-86	271
EFX02705	2155|PHI:2155|MoPEX7|B8Q8Z5|148305|Magnaporthe	71.27	355	90	4	1	353	1	345	0	533
EFX02947	1464|PHI:1464|GzCCAAT004|I1RMV4|5518|Gibberella	61.76	136	35	1	1	136	1	119	7e-55	176
EFX02620	1334|PHI:1334|GzbZIP016|I1RZI7|5518|Gibberella	51.79	168	64	2	80	243	67	221	1e-35	131
EFX03003	339|PHI:339|CLPT1|CAC41973|290576|Colletotrichum	89.27	205	19	1	1	205	1	202	3e-135	379
EFX02688	2656|PHI:2656|pmrF|D0ZPP5|90371|Salmonella	25.63	199	110	6	116	313	10	171	2e-09	55.5
EFX02828	226|PHI:226|PEX6|AAK16738|5462|Colletotrichum	31.87	411	236	12	354	729	852	1253	2e-50	189
EFX02648	2038|PHI:2038|Mir1|MGG_02370|148305|Magnaporthe	26.96	230	144	10	37	255	40	256	4e-07	48.1
EFX03132	1582|PHI:1582|GzOB022|I1RQ81|5518|Gibberella	81.17	308	58	0	1	308	1	308	0	531
EFX02937	2684|PHI:2684|crp|P0A2T6|90371|Salmonella	25.42	118	80	2	849	958	9	126	5e-07	49.7
EFX02890	286|PHI:286|CLC-A|AAO73005|5207|Cryptococcus	48.73	786	343	12	603	1334	37	816	0	698
EFX02659	511|PHI:511|CaNAG4|EAK93098|5476|Candida	52.15	466	191	6	74	508	111	575	2e-152	449
EFX02789	1843|PHI:1843|GzZC158|I1S4X3|5518|Gibberella	21.61	347	249	9	1	330	376	716	3e-12	66.2
EFX03334	2094|PHI:2094|Yvc1|MGG_09828|148305|Magnaporthe	21.92	333	217	8	390	692	234	553	9e-18	85.9
EFX03019	2804|PHI:2804|ecp6|Q2FDM5|93612|Setosphaeria	28.82	229	156	5	2021	2245	10	235	3e-19	89.4
EFX02987	2382|PHI:2382|Upa2|Q6QIY0|5270|Ustilago	49.39	245	117	3	1	240	4	246	1e-70	228
EFX02987	2382|PHI:2382|Upa2|Q6QIY0|5270|Ustilago	66.39	119	40	0	295	413	160	278	3e-51	176
EFX02784	853|PHI:853|YAP1|EAK83313|5270|Ustilago	32	125	76	3	323	439	92	215	3e-08	53.9
EFX02573	2843|PHI:2843|CnPlb1|Q9P8P2|5207|Cryptococcus	23.83	428	229	18	218	610	61	426	3e-15	77
EFX03200	790|PHI:790|MGG_07259|EDK03989|318829|Magnaporthe	43.93	544	207	16	1	515	1	475	2e-111	357
EFX02619	419|PHI:419|CSH1|AAP93915|5476|Candida	27.95	322	213	9	27	336	1	315	1e-30	117
EFX02751	1627|PHI:1627|GzTF2S002|I1RW90|5518|Gibberella	35.25	122	59	6	7	121	2	110	1e-09	49.7
EFX03183	339|PHI:339|CLPT1|CAC41973|290576|Colletotrichum	39.85	133	73	4	7	139	12	137	6e-23	93.2
EFX03069	544|PHI:544|BCMFS1|AAF64435|332648|Botrytis	25.93	482	318	12	2	458	113	580	5e-31	124
EFX02921	2247|PHI:2247|Sch1|EAT82552|13684|Phaeosphaeria	34.62	208	115	8	11	216	38	226	7e-16	73.2
EFX02637	3312	43.72	812	324	17	1	764	1	727	0	564
EFX02736	504|PHI:504|LEU2|CAA42366|4932|Saccharomyces	28.65	356	224	12	53	381	7	359	2e-28	112
EFX03097	1712|PHI:1712|GzZC027|I1RMV9|5518|Gibberella	72.92	480	123	5	191	668	142	616	0	714
EFX02606	2898|PHI:2896|BEC1005|CCU82697|62688|Blumeria	31.08	325	184	12	1	316	1	294	6e-31	119
EFX03007	1524|PHI:1524|GzHOMEL033|I1RZF2|5518|Gibberella	28.44	552	297	14	128	667	76	541	2e-52	189
EFX03248	2655|PHI:2655|lon|K1C7N5|287|Pseudomonas	46.73	398	210	2	441	838	157	552	5e-117	382
EFX03248	2655|PHI:2655|lon|K1C7N5|287|Pseudomonas	41.63	209	117	2	919	1127	561	764	5e-40	157
EFX03209	1275|PHI:1275|FGSG_03146|I1S7R2|5518|Gibberella	54.97	553	166	9	227	768	64	544	0	552
EFX03072	2605|PHI:2605|hgc1|Q5ABE2	78.17	449	96	1	22	470	10	456	0	746
EFX02741	1526|PHI:1526|GzHOMEL036|I1S0J3|5518|Gibberella	36.43	129	82	0	1087	1215	567	695	2e-19	91.7
EFX02741	1526|PHI:1526|GzHOMEL036|I1S0J3|5518|Gibberella	24.04	312	182	11	550	844	193	466	1e-13	72.8
EFX02839	1383|PHI:1383|GzC2H046|I1RS27|5518|Gibberella	42.24	277	93	6	35	264	1	257	2e-65	206
EFX03028	1426|PHI:1426|GzC2H094|I1S4M4|5518|Gibberella	55.3	443	178	8	2	441	30	455	2e-156	464
EFX03089	399|PHI:399|PMT4|EAK95207|5476|Candida	46.69	786	363	11	9	778	10	755	0	702
EFX02729	2357|PHI:2357|CYP52X1|E2EAF6|475271|Beauveria	28.74	254	146	8	371	609	287	520	3e-16	79.3
EFX02707	716|PHI:716|ZEB1|ABB90284|5518|Fusarium	27.59	174	118	4	7	172	119	292	3e-11	62.4
EFX02943	2908|PHI:2908|CYP51B|I1RBR4|5518|Fusarium	22.92	288	176	13	282	554	239	495	7e-08	52.4
EFX02887	1049|PHI:1049|CTB2|ABK64180|29003|Cercospora	24.38	443	264	18	7	393	9	436	2e-28	113
EFX02758	255|PHI:255|FUM1	31.1	2666	1584	69	48	2606	31	2550	0	1022
EFX02869	784|PHI:784|MGG_00056|EDK03390|318829|Magnaporthe	28.21	156	100	6	47	197	67	215	2e-07	48.1
EFX02775	1836|PHI:1836|GzZC151|I1RFH1|5518|Gibberella	20.48	503	322	15	128	615	1	440	6e-15	75.5
EFX03043	438|PHI:438|BcBOT1	27.61	507	312	12	30	527	29	489	4e-52	185
EFX02951	544|PHI:544|BCMFS1|AAF64435|332648|Botrytis	46.67	465	246	1	1	465	82	544	1e-149	451
EFX03286	2315|PHI:2315|ChLae1|G4XKY9|5016|Cochliobolus	34.58	295	177	10	131	416	3	290	1e-48	167
EFX02618	2315|PHI:2315|ChLae1|G4XKY9|5016|Cochliobolus	30.85	282	175	6	40	301	9	290	2e-41	145
EFX02940	2645|PHI:2645|ClpV|Q7WP75|518|Bordetella	26.32	266	153	12	377	625	560	799	5e-07	50.4
EFX03118	1539|PHI:1539|GzMyb003|I1RCG0|5518|Gibberella	32.9	307	108	10	60	361	35	248	5e-36	131
EFX02908	267|PHI:267|MLT1|AAD51594|5476|Candida	28.17	646	371	18	288	903	310	892	4e-56	212
EFX02908	267|PHI:267|MLT1|AAD51594|5476|Candida	32.53	372	243	4	1081	1444	1091	1462	6e-53	202
EFX02908	267|PHI:267|MLT1|AAD51594|5476|Candida	42.86	154	75	4	1520	1672	1462	1603	1e-25	113
EFX02621	1896|PHI:1896|GzZC211|I1RNR1|5518|Gibberella	21.37	627	403	17	24	579	104	711	1e-22	100
EFX02778	3415	25.4	500	316	17	140	622	189	648	3e-37	144
EFX03326	800|PHI:800|MGG_13324|EDK00897|318829|Magnaporthe	49.72	1261	466	32	1	1207	1	1147	0	1113
EFX02635	2256|PHI:2256|Xdh1|Q0UA24|13684|Phaeosphaeria	33.92	398	213	6	34	430	13	361	1e-69	225
EFX02909	804|PHI:804|MGG_08628|EDJ94907|318829|Magnaporthe	63.8	221	64	3	8	228	9	213	4e-90	266
EFX02574	1458|PHI:1458|GzAra006|Q4I7F9|5518|Gibberella	34.35	460	263	7	202	633	272	720	1e-77	263
EFX03180	2601|PHI:2601|Asc1|P83774|746128|Aspergillus	24.74	194	120	5	299	488	60	231	5e-14	70.9
EFX02679	1211|PHI:1211|FGSG_06970|I1RRQ8|5518|Gibberella	69.06	404	117	2	755	1158	329	724	0	603
EFX03104	2155|PHI:2155|MoPEX7|B8Q8Z5|148305|Magnaporthe	24.06	345	213	11	108	432	23	338	8e-16	75.9
EFX02767	1671|PHI:1671|GzCCHC011|Q4HWE2|5518|Gibberella	38.83	443	198	9	1	376	1	437	1e-87	306
EFX02767	1671|PHI:1671|GzCCHC011|Q4HWE2|5518|Gibberella	38.99	218	124	3	528	742	543	754	9e-41	161
EFX02672	1457|PHI:1457|GzAra005|I1RRR9|5518|Gibberella	53.83	574	244	6	10	582	7	560	0	599
EFX02861	1574|PHI:1574|GzOB014|I1RFX8|5518|Gibberella	39.4	599	281	16	73	633	251	805	2e-109	353
EFX03319	1752|PHI:1752|GzZC067|I1RZR8|5518|Gibberella	55.23	965	301	19	1	933	1	866	0	976
EFX02935	2315|PHI:2315|ChLae1|G4XKY9|5016|Cochliobolus	32	225	145	5	67	287	70	290	4e-31	117
EFX02753	1274|PHI:1274|FGSG_02488|I1RME6|5518|Gibberella	54.53	1722	655	30	1	1708	1	1608	0	1782
EFX02843	3411	28.94	349	215	8	134	480	77	394	1e-33	131
EFX03271	1503|PHI:1503|GzHMG035|I1S828|5518|Gibberella	24.72	271	165	9	18	285	270	504	8e-09	53.5
EFX03191	2227|PHI:2227|pao|D4III8|5270|Ustilago	23.98	221	136	5	58	254	23	235	5e-07	47.8
EFX03302	1670|PHI:1670|GzCCHC010|I1S0Q0|5518|Gibberella	66.3	184	44	3	7	190	15	180	5e-74	222
EFX03302	1670|PHI:1670|GzCCHC010|I1S0Q0|5518|Gibberella	38.05	113	43	3	6	101	58	160	8e-15	67
EFX03302	1670|PHI:1670|GzCCHC010|I1S0Q0|5518|Gibberella	38.32	107	42	3	4	95	81	178	1e-13	63.5
EFX02776	1555|PHI:1555|GzMyb019|I1RDG6|5518|Gibberella	23.06	451	310	13	1329	1772	75	495	2e-20	94.4
EFX02671	2142|PHI:2142|MoAP1|XP_001408783|148305|Magnaporthe	51.72	609	235	14	6	601	11	573	8e-173	505
EFX02821	1242|PHI:1242|FGSG_02838|I1RWG2|5518|Gibberella	53.66	492	112	9	100	544	1	423	2e-148	435
EFX02891	1948|PHI:1948|GzZC263|I1RI81|5518|Gibberella	27.73	256	161	5	129	361	52	306	1e-21	95.9
EFX02891	1948|PHI:1948|GzZC263|I1RI81|5518|Gibberella	46.05	76	33	1	1	76	1	68	5e-15	74.7
EFX03107	893|PHI:893|MGG_02986|EDK01543|318829|Magnaporthe	23.65	482	290	13	855	1292	1160	1607	6e-22	100
EFX02898	2616|PHI:2616|InlA|Q2L8G9|1639|Listeria	34.17	120	70	4	9	124	237	351	6e-07	47
EFX03246	1514|PHI:1514|GzHOME012|I1RYV5|5518|Gibberella	49.47	938	380	21	13	943	7	857	0	855
EFX03246	1514|PHI:1514|GzHOME012|I1RYV5|5518|Gibberella	31.15	565	259	17	682	1228	706	1158	2e-59	221
EFX03246	1514|PHI:1514|GzHOME012|I1RYV5|5518|Gibberella	30.64	173	77	6	880	1014	697	864	4e-10	61.6
EFX02706	2734|PHI:2734|	32.75	284	171	6	14	290	4	274	1e-37	139
EFX03008	3415	22.82	539	281	17	151	614	181	659	6e-27	113
EFX03105	1676|PHI:1676|GzDHHC004|Q4I2M7|5518|Gibberella	51.54	714	254	20	28	705	16	673	0	633
EFX03298	3287	38.89	720	368	12	293	969	199	889	3e-167	514
EFX03298	3287	28.87	142	90	4	5	143	7	140	5e-12	67.4
EFX02989	1891|PHI:1891|GzZC206|I1RRM0|5518|Gibberella	36.62	699	349	15	60	748	12	626	3e-133	419
EFX03133	1883|PHI:1883|GzZC198|I1RJ71|5518|Gibberella	29.82	114	60	4	64	175	8	103	6e-08	52.8
EFX02623	1187|PHI:1187|(Sc	80.3	538	91	2	249	785	136	659	0	934
EFX02623	1187|PHI:1187|(Sc	45.21	73	36	2	1	69	1	73	2e-10	61.2
EFX02942	287|PHI:287|CLNR1|AAN65464|290576|Colletotrichum	49.5	1109	361	50	1	1048	1	971	0	776
EFX03294	1357|PHI:1357|GzC2H017|I1RFY9|5518|Gibberella	47.56	492	215	8	4	495	3	451	7e-136	434
EFX03294	1357|PHI:1357|GzC2H017|I1RFY9|5518|Gibberella	54.49	334	107	7	617	948	494	784	4e-102	342
EFX03081	267|PHI:267|MLT1|AAD51594|5476|Candida	21.63	527	341	13	236	727	304	793	7e-23	102
EFX02994	267|PHI:267|MLT1|AAD51594|5476|Candida	29.4	432	243	8	186	560	1172	1598	2e-44	168
EFX02748	2260|PHI:2260|PKS1|G8DNT0|45130|Cochliobolus	38.62	989	578	15	648	1625	760	1730	0	663
EFX02748	2260|PHI:2260|PKS1|G8DNT0|45130|Cochliobolus	42.65	687	333	11	42	680	24	697	1e-155	524
EFX03128	2844|PHI:2844|BRM2|O93802|5599|Alternaria	34.6	263	156	8	347	601	9	263	3e-37	137
EFX02941	2313|PHI:2313|SCD|F8R4X8|5530|Metarhizium	53.33	150	70	0	8	157	13	162	1e-56	176
EFX03208	2022|PHI:2022|BUF1|MGG_02252|148305|Magnaporthe	57.92	259	105	3	10	267	27	282	1e-96	286
EFX02986	112|PHI:112|MAK1|AAC49410|140110|Nectria	33.6	372	220	10	61	431	113	458	5e-58	197
EFX02678	112|PHI:112|MAK1|AAC49410|140110|Nectria	45.59	68	36	1	47	114	11	77	2e-12	60.5
EFX03240	1161|PHI:1161|MgMfs1|A4ZGP3|54734|Mycosphaerella	41.51	571	312	8	2	561	20	579	6e-147	447
EFX02983	1051|PHI:1051|CTB3|ABC79591|29003|Cercospora	23.18	358	218	8	83	409	72	403	4e-18	84.3
EFX03048	2535|PHI:2535|ERG11B	22.83	311	197	9	241	529	230	519	7e-14	71.2
EFX02720	55|PHI:55|PKS1|AAB08104|5016|Cochliobolus	56.86	51	22	0	66	116	274	324	3e-15	70.1
EFX02720	55|PHI:55|PKS1|AAB08104|5016|Cochliobolus	31.25	80	53	1	14	91	106	185	2e-08	49.7
EFX02944	2315|PHI:2315|ChLae1|G4XKY9|5016|Cochliobolus	34.13	293	182	6	77	359	1	292	9e-44	153
EFX02647	1051|PHI:1051|CTB3|ABC79591|29003|Cercospora	28.72	195	126	6	1	187	458	647	9e-12	63.9
EFX03220	2315|PHI:2315|ChLae1|G4XKY9|5016|Cochliobolus	31.38	290	186	5	47	323	1	290	8e-44	152
EFX03056	1662|PHI:1662|GzCCHC002|I1REJ1|5518|Gibberella	27.88	226	153	4	24	249	653	868	1e-24	105
EFX02877	1574|PHI:1574|GzOB014|I1RFX8|5518|Gibberella	65.21	868	215	15	1	793	1	856	0	1019
EFX02704	2315|PHI:2315|ChLae1|G4XKY9|5016|Cochliobolus	33.33	294	183	7	60	344	2	291	2e-51	173
EFX03023	1618|PHI:1618|GzFET5|Q4IQT8|5518|Gibberella	32.16	283	149	6	3	252	4	276	3e-40	144
EFX02910	2601|PHI:2601|Asc1|P83774|746128|Aspergillus	25.85	147	98	4	31	172	82	222	8e-07	47.4
EFX02920	1449|PHI:1449|GzGATA007|I1RYV4|5518|Gibberella	43.38	634	222	20	1	596	20	554	5e-124	378
EFX03079	3384	30.2	1076	681	30	14	1066	30	1058	3e-156	493
EFX02930	1051|PHI:1051|CTB3|ABC79591|29003|Cercospora	26.73	434	248	11	4	390	455	865	1e-31	125
EFX03178	511|PHI:511|CaNAG4|EAK93098|5476|Candida	27.86	499	340	10	5	493	85	573	9e-48	173
EFX02582	2020|PHI:2020|Tup1|XP_759427|5270|Ustilago	25.71	280	171	11	355	624	472	724	4e-12	66.6
EFX02582	2020|PHI:2020|Tup1|XP_759427|5270|Ustilago	30.07	143	79	4	488	626	501	626	2e-11	64.7
EFX02582	2020|PHI:2020|Tup1|XP_759427|5270|Ustilago	25.93	162	85	6	571	711	477	624	9e-07	49.3
EFX02686	419|PHI:419|CSH1|AAP93915|5476|Candida	27.55	323	202	10	28	327	1	314	2e-31	120
EFX03171	2544|PHI:2544|PAB1|Q4WK03|746128|Aspergillus	24.83	286	179	8	39	314	46	305	1e-12	66.2
EFX02927	465|PHI:465|KIN2|AAB63337|5270|Ustilago	52.99	1002	386	19	4	958	2	965	0	971
EFX03009	2529|PHI:2529|ERG10|Q4WCL5|746128|Aspergillus	49.49	396	191	5	35	426	8	398	7e-119	353
EFX03087	417|PHI:417|MST7||318829|Magnaporthe	85.85	417	53	4	1	414	1	414	0	704
EFX03254	2921|PHI:2921|FET3-2|E3Q7G1|31870|Colletotrichum	43.08	520	285	7	21	534	26	540	4e-152	452
EFX02617	40|PHI:40|PKS1|BAA18956|5462|Colletotrichum	68.77	2200	624	13	1	2165	1	2172	0	3094
EFX02691	2203|PHI:2203|Transcription	42.72	419	191	12	12	422	73	450	2e-90	282
EFX02958	2844|PHI:2844|BRM2|O93802|5599|Alternaria	50.19	259	126	2	35	291	10	267	3e-85	258
EFX03282	2506|PHI:2506|Amr1|G3F820|29001|Alternaria	46.83	583	287	9	353	923	390	961	5e-168	523
EFX03282	2506|PHI:2506|Amr1|G3F820|29001|Alternaria	55.56	99	42	1	3	99	42	140	8e-29	122
EFX03035	1617|PHI:1617|GzssDB002|I1S0G0|5518|Gibberella	42.07	145	82	1	18	162	5	147	3e-33	115
EFX03054	2091|PHI:2091|MgATG5|EF486491|148305|Magnaporthe	47.98	321	108	4	19	336	50	314	2e-87	266
EFX02815	1163|PHI:1163|ERB1	36.32	972	471	26	362	1283	255	1128	8e-144	471
EFX02653	211|PHI:211|CaTUP1|AAB63195|5476|Candida	22.41	299	145	9	75	360	268	492	9e-10	58.2
EFX02848	1185|PHI:1185|(Sc	46.31	501	204	13	712	1207	609	1049	9e-122	403
EFX02848	1185|PHI:1185|(Sc	32.84	603	250	24	182	711	11	531	2e-50	191
EFX03291	901|PHI:901|um01886||5270|Ustilago	30.43	437	265	14	54	468	165	584	6e-48	176
EFX03213	544|PHI:544|BCMFS1|AAF64435|332648|Botrytis	24.94	385	251	8	12	370	33	405	1e-24	106
EFX02666	3663	25.51	196	117	6	75	253	74	257	4e-07	49.7
EFX03274	1689|PHI:1689|GzZC004|I1S018|5518|Gibberella	48.56	867	332	18	1	838	22	803	0	743
EFX02975	2034|PHI:2034|MFP1|G4MZY1|148305|Magnaporthe	69.03	904	271	3	1	904	1	895	0	1300
EFX03002	3280	91.12	214	18	1	1	213	1	214	1e-134	378
EFX03329	2644|PHI:2644|thioredoxin	30.38	79	55	0	292	370	8	86	2e-10	57.4
EFX02733	2358|PHI:2358|PLD|Q4WZL4|746128|Aspergillus	51.49	505	215	11	403	898	618	1101	2e-150	473
EFX02733	2358|PHI:2358|PLD|Q4WZL4|746128|Aspergillus	59.47	338	128	3	2	330	98	435	1e-131	423
EFX02713	3236	28.13	487	264	17	393	862	102	519	1e-42	162
EFX02807	2069|PHI:2069|Moatg1|MGG_06393|148305|Magnaporthe	61.17	1079	287	27	1	1044	1	982	0	1159
EFX02696	3126	34.84	399	242	6	27	423	21	403	1e-74	240
EFX02643	1555|PHI:1555|GzMyb019|I1RDG6|5518|Gibberella	23.85	478	333	9	60	513	74	544	1e-30	122
EFX03214	3062	50.06	887	314	29	90	952	37	818	0	623
EFX02676	1257|PHI:1257|FGSG_13509|I1RSK0|5518|Gibberella	30.74	283	144	13	228	476	293	557	2e-20	95.5
EFX02781	178|PHI:178|pabaA|AAD31929|5085|Aspergillus	33.82	207	107	9	26	205	29	232	5e-16	79.7
EFX03264	1465|PHI:1465|GzCCAAT005|I1RNC6|5518|Gibberella	65.67	134	30	1	239	372	211	328	4e-48	166
EFX02572	3287	27.48	262	159	7	833	1088	635	871	4e-21	97.1
EFX03109	2336|PHI:2336|NIA1|O00101|13684|Stagonospora	33.08	263	152	8	49	292	626	883	1e-29	117
EFX02681	2130|PHI:2130|MoHox4|MGG_06285|148305|Magnaporthe	49.01	1057	380	27	7	1007	23	976	0	881
EFX02949	2131|PHI:2131|MoHox7|MGG_12865|148305|Magnaporthe	37.15	576	209	18	1	552	24	470	1e-71	237
EFX03227	2052|PHI:2052|Cdc42|Q9P8I4|148305|Magnaporthe	95.36	194	9	0	1	194	1	194	7e-139	387
EFX02730	1595|PHI:1595|GzOB035|I1RX22|5518|Gibberella	51.29	581	256	7	22	596	4	563	0	568
EFX02593	286|PHI:286|CLC-A|AAO73005|5207|Cryptococcus	37.48	755	394	18	36	743	46	769	1e-145	450
EFX03223	2060|PHI:2060|MgLig4|B6ZH51|148305|Magnaporthe	27.06	462	270	16	372	799	218	646	9e-32	130
EFX03088	3101	27.21	272	173	5	118	376	112	371	1e-22	96.7
EFX02967	2020|PHI:2020|Tup1|XP_759427|5270|Ustilago	30.08	256	141	10	397	616	476	729	5e-23	102
EFX02967	2020|PHI:2020|Tup1|XP_759427|5270|Ustilago	26.25	301	182	9	435	696	427	726	1e-21	97.8
EFX02967	2020|PHI:2020|Tup1|XP_759427|5270|Ustilago	29.07	227	137	8	458	661	410	635	2e-19	90.1
EFX03242	1180|PHI:1180|(Sc	81.56	347	52	4	2	347	164	499	0	599
EFX03156	3177	55.79	579	220	13	43	600	25	588	0	606
EFX02995	1643|PHI:1643|GzWing015|I1RS37|5518|Gibberella	46.33	777	338	26	1	752	25	747	3e-167	504
EFX02966	2643|PHI:2643|CFAS|A4HTK3|5671|Leishmania	30.41	296	180	10	193	473	190	474	3e-29	117
EFX03259	1546|PHI:1546|GzMyb010|Q4IB96|5518|Gibberella	49.32	657	275	15	402	1036	714	1334	0	604
EFX03259	1546|PHI:1546|GzMyb010|Q4IB96|5518|Gibberella	48.96	96	49	0	1	96	88	183	1e-15	80.1
EFX02923	1681|PHI:1681|GzNF001|I1REN7|5518|Gibberella	28.31	332	174	13	1052	1341	730	1039	3e-22	102
EFX02996	2028|PHI:2028|TGL1-2|G4NBI7|148305|Magnaporthe	49.51	719	250	9	47	705	138	803	0	630
EFX02801	2033|PHI:2033|MgPex6|G4NBI6|148305|Magnaporthe	58.18	1418	433	28	26	1353	15	1362	0	1433
EFX02971	2377|PHI:2377|DEP3|D2E9W8|29001|Alternaria	37.36	546	288	7	24	536	28	552	2e-116	357
EFX03038	115|PHI:115|PGX1|AAC26146|5017|Cochliobolus	22.96	405	255	15	18	379	39	429	2e-12	66.2
EFX02769	541|PHI:541|LIP1|AAU87359|332648|Botrytis	34.89	235	128	5	57	291	122	331	2e-33	132
EFX02634	1161|PHI:1161|MgMfs1|A4ZGP3|54734|Mycosphaerella	49.16	299	121	3	43	313	98	393	1e-88	281
EFX02604	1839|PHI:1839|GzZC154|I1RDM2|5518|Gibberella	25	456	247	15	252	631	159	595	1e-22	100
EFX03127	2818|PHI:2818|Acpg1|Q9C4A1|135859|Alternaria	63.25	351	108	5	13	345	32	379	9e-143	411
EFX03076	1028|PHI:1028|bcpme1|CAC29255|40559|Botrytis	41.02	334	154	8	5	298	14	344	3e-58	201
EFX03047	115|PHI:115|PGX1|AAC26146|5017|Cochliobolus	22.35	434	271	13	1	373	1	429	3e-13	68.6
EFX02856	508|PHI:508|AFT1|BAB69076|5599|Alternaria	31.15	581	344	18	1	544	1	562	4e-60	209
EFX03267	2183|PHI:2183|CPXB|EHA48040.1|148305|Magnaporthe	25.63	355	162	11	95	347	105	459	4e-19	86.3
EFX03160	3271	92.34	248	17	1	32	279	5	250	6e-170	474
EFX02857	2735|PHI:2735|RsmA|D0KML5|55208|Pectobacterium	33.8	213	124	5	42	243	38	244	5e-24	97.1
EFX03062	3381	30.49	656	381	13	5	618	13	635	2e-83	276
EFX02932	441|PHI:441|BTP1|CAE55153|40559|Botrytis	35.67	171	101	5	32	199	130	294	9e-19	82.8
EFX02836	179|PHI:179|PELA|AAA33338|140110|Nectria	47.26	237	112	6	1	234	1	227	8e-63	197
EFX03025	197|PHI:197|ALO1|AAC98913|5476|Candida	25.23	214	146	4	39	242	31	240	4e-10	58.9
EFX02660	1907|PHI:1907|GzZC222|I1RHJ0|5518|Gibberella	38.29	820	331	17	13	738	19	757	5e-164	493
EFX02661	3272	30.82	331	201	10	64	387	12	321	2e-19	89.4
EFX03168	1590|PHI:1590|GzOB030|I1RWI5|5518|Gibberella	69.81	159	44	2	1	157	1	157	6e-71	212
EFX03273	1555|PHI:1555|GzMyb019|I1RDG6|5518|Gibberella	23.9	364	237	9	116	447	74	429	4e-24	103
EFX02598	1968|PHI:1968|GzZC283|I1RB12|5518|Gibberella	31.26	483	276	15	305	783	207	637	2e-58	210
EFX02598	1968|PHI:1968|GzZC283|I1RB12|5518|Gibberella	40	105	58	3	56	155	28	132	3e-15	77
EFX03121	831|PHI:831|ERG2|CAA80454|318829|Magnaporthe	67.61	213	69	0	1	213	9	221	8e-110	315
EFX02845	1796|PHI:1796|GzZC111|I1RSR7|5518|Gibberella	40.61	591	297	15	32	603	196	751	8e-142	431
EFX02817	267|PHI:267|MLT1|AAD51594|5476|Candida	29.92	1407	783	28	152	1439	282	1604	0	586
EFX02806	1568|PHI:1568|GzOB008|I1RCE1|5518|Gibberella	29.23	1153	579	33	24	1153	49	987	1e-128	420
EFX03303	816|PHI:816|MGG_04582|EDJ95999|318829|Magnaporthe	51.62	463	214	3	459	920	86	539	2e-124	389
EFX03303	816|PHI:816|MGG_04582|EDJ95999|318829|Magnaporthe	46.92	260	86	7	1	250	1	218	3e-17	83.2
EFX03303	816|PHI:816|MGG_04582|EDJ95999|318829|Magnaporthe	61.94	134	50	1	288	421	86	218	1e-16	81.3
EFX02689	2925|PHI:2925|lip2|J9MBA2|59765|Fusarium	51.9	158	50	3	45	178	39	194	1e-46	158
EFX03094	1680|PHI:1680|GzMIZ002|I1S004|5518|Gibberella	33.89	422	238	10	592	1009	724	1108	4e-60	221
EFX03094	1680|PHI:1680|GzMIZ002|I1S004|5518|Gibberella	29.44	197	126	3	253	442	271	461	6e-23	103
EFX03231	2826|PHI:2826|Fgb1|Q6XPX0|59765|Fusarium	25.86	174	100	3	150	320	210	357	8e-12	64.3
EFX02896	440|PHI:440|PMR1|CAB87245|5476|Candida	35.68	950	521	26	16	956	36	904	3e-161	499
EFX03256	3050	62.54	1132	375	11	73	1187	57	1156	0	1391
EFX03123	799|PHI:799|MGG_03530|EDJ94565|318829|Magnaporthe	29.79	376	238	9	370	736	219	577	3e-37	147
EFX03150	2020|PHI:2020|Tup1|XP_759427|5270|Ustilago	22.88	236	140	8	438	642	401	625	3e-07	51.2
EFX03036	1220|PHI:1220|FGSG_02488|I1RCF7|5518|Gibberella	54.29	1096	363	16	27	1110	3	972	0	1055
EFX03177	339|PHI:339|CLPT1|CAC41973|290576|Colletotrichum	24.04	183	100	6	13	160	11	189	4e-09	51.2
EFX03284	1506|PHI:1506|GzHOME001|I1RC01|5518|Gibberella	39.37	630	236	28	37	641	78	586	6e-88	286
EFX03218	310|PHI:310|MgAtr4|AAK15314|54734|Mycosphaerella	57.19	1516	522	16	2	1422	42	1525	0	1702
EFX02754	1658|PHI:1658|GzCCCH002|I1RRW3|5518|Gibberella	89.95	209	20	1	1	208	1	209	1e-141	395
EFX02680	2158|PHI:2158|MoCMK1|EU	75.06	385	71	2	2	375	29	399	0	592
EFX03272	1503|PHI:1503|GzHMG035|I1S828|5518|Gibberella	47.99	748	301	11	563	1310	1	660	0	672
EFX03181	1291|PHI:1291|TOP1|I1RRX4|5518|Gibberella	57.5	913	299	14	4	832	3	910	0	958
EFX02649	3028	31.01	316	171	10	235	547	78	349	4e-32	127
EFX02953	2357|PHI:2357|CYP52X1|E2EAF6|475271|Beauveria	40.56	466	216	14	94	540	97	520	8e-94	297
EFX02959	3238	26.18	191	108	5	1	158	32	222	8e-12	58.9
EFX02727	1675|PHI:1675|GzDHHC003|Q4I8B6|5518|Gibberella	66.02	718	223	6	20	736	4	701	0	1002
EFX02838	877|PHI:877|MGG_00383|EDK03005|318829|Magnaporthe	88.14	388	41	1	12	399	11	393	0	686
EFX02695	2171|PHI:2171|Peroxisomal	66.2	710	229	5	1	705	1	704	0	981
EFX05190	2976|PHI:2976|CgOPT1|C6ZRH8|29905|Colletotrichum	46.15	741	393	4	32	769	7	744	0	674
EFX05182	55|PHI:55|PKS1|AAB08104|5016|Cochliobolus	28.51	235	159	4	16	247	1834	2062	1e-21	94
EFX05185	2968|PHI:2968|Hxs1|J9VQA5|5207|Cryptococcus	31.59	497	323	5	46	541	8	488	3e-86	277
EFX05142	144|PHI:144|CHT42|AAC05829|29875|Trichoderma	20.53	263	152	7	38	258	51	298	1e-08	54.3
EFX05162	1783|PHI:1783|GzZC098|I1S2C5|5518|Gibberella	25.76	726	400	27	14	705	62	682	1e-28	119
EFX05145	4194	27.76	508	311	17	1	491	7	475	3e-46	168
EFX05169	544|PHI:544|BCMFS1|AAF64435|332648|Botrytis	25.31	399	272	7	30	426	103	477	1e-25	108
EFX05166	2745|PHI:2745|treY|Q02LV5|287|Pseudomonas	36.71	79	44	2	147	225	25	97	7e-08	53.1
EFX05151	510|PHI:510|CaNAG3|EAK93097|5476|Candida	20.93	559	355	14	42	556	46	561	2e-18	85.5
EFX05148	206|PHI:206|CaNAG1|BAB43821|5476|Candida	48.58	247	119	4	1	245	1	241	5e-71	222
EFX05176	1886|PHI:1886|GzZC201|I1RU19|5518|Gibberella	54.78	513	175	10	67	579	21	476	0	541
EFX05177	217|PHI:217|HXK1|EAK93243|5476|Candida	23.43	431	263	18	19	414	42	440	8e-13	67.8
EFX05188	2173|PHI:2173|NMR1|MGG_10017|148305|Magnaporthe	43.91	312	165	5	1	312	1	302	4e-85	260
EFX05131	2315|PHI:2315|ChLae1|G4XKY9|5016|Cochliobolus	25.38	197	106	6	30	185	18	214	6e-13	63.2
EFX05157	419|PHI:419|CSH1|AAP93915|5476|Candida	27.55	323	217	11	28	342	1	314	2e-27	108
EFX05181	1776|PHI:1776|GzZC091|I1S0X3|5518|Gibberella	27.27	352	206	5	45	396	59	360	4e-31	120
EFX05178	2022|PHI:2022|BUF1|MGG_02252|148305|Magnaporthe	28.79	264	159	7	2	245	26	280	1e-29	111
EFX05159	922|PHI:922|um03615||5270|Ustilago	28.24	595	352	18	14	540	84	671	6e-44	163
EFX05161	1555|PHI:1555|GzMyb019|I1RDG6|5518|Gibberella	22.72	471	317	13	50	491	73	525	3e-22	97.1
EFX05128	816|PHI:816|MGG_04582|EDJ95999|318829|Magnaporthe	28.43	204	108	9	515	702	310	491	1e-11	64.7
EFX05156	1306|PHI:1306|GzbHLH007|I1RGF4|5518|Gibberella	59.68	124	34	1	230	353	195	302	1e-39	142
EFX05160	1336|PHI:1336|GzbZIP018|I1S462|5518|Gibberella	44.78	268	99	11	4	240	11	260	3e-46	167
EFX05165	2020|PHI:2020|Tup1|XP_759427|5270|Ustilago	27.43	175	103	5	70	237	553	710	5e-07	50.1
EFX05158	2601|PHI:2601|Asc1|P83774|746128|Aspergillus	29.21	178	112	8	18	192	64	230	1e-08	53.5
EFX05187	2179|PHI:2179|Moplaa|F8SM03|148305|Magnaporthe	43.56	404	211	7	8	402	4	399	9e-106	342
EFX05187	2179|PHI:2179|Moplaa|F8SM03|148305|Magnaporthe	25.3	332	216	8	420	737	483	796	8e-21	94.7
EFX05170	1783|PHI:1783|GzZC098|I1S2C5|5518|Gibberella	27.25	345	196	12	26	350	62	371	1e-13	71.2
EFX05171	1662|PHI:1662|GzCCHC002|I1REJ1|5518|Gibberella	29.5	278	186	4	61	334	655	926	2e-40	152
EFX05143	544|PHI:544|BCMFS1|AAF64435|332648|Botrytis	23.73	316	226	10	21	329	88	395	4e-11	62.4
EFW99106	3090	29.95	995	560	30	177	1111	465	1382	5e-102	355
EFW99243	1578|PHI:1578|GzOB018|I1RKY2|5518|Gibberella	80.04	541	98	3	28	566	43	575	0	892
EFW99172	2315|PHI:2315|ChLae1|G4XKY9|5016|Cochliobolus	39.13	184	106	4	92	270	3	185	3e-39	139
EFW99233	267|PHI:267|MLT1|AAD51594|5476|Candida	36.39	1616	879	30	35	1551	41	1606	0	976
EFW99344	1223|PHI:1223|FGSG_12887|I1RN31|5518|Gibberella	86.21	319	34	1	94	412	1	309	0	568
EFW99304	1497|PHI:1497|GzHMG029|I1RZL9|5518|Gibberella	30.99	668	311	19	9	650	11	554	5e-58	204
EFW99063	433|PHI:433|CTB1|AAT69682|29003|Cercospora	22.82	412	238	13	316	703	855	1210	2e-10	62.8
EFW99377	887|PHI:887|MGG_05174|EDJ95219|318829|Magnaporthe	49.69	163	77	2	125	286	137	295	4e-39	148
EFW99270	1846|PHI:1846|GzZC161|I1S7A6|5518|Gibberella	30.38	395	235	5	392	783	1	358	5e-61	210
EFW99090	1203|PHI:1203|(Sc	80.26	461	72	7	1	450	1	453	0	736
EFW99332	1525|PHI:1525|GzHOMEL035|Q4HY90|5518|Gibberella	50	728	254	22	1	722	1	624	0	565
EFW99184	1772|PHI:1772|GzZC087|I1S053|5518|Gibberella	61.07	244	80	8	276	513	172	406	3e-77	264
EFW99184	1772|PHI:1772|GzZC087|I1S053|5518|Gibberella	52.6	192	82	3	697	883	437	624	3e-57	206
EFW99158	1854|PHI:1854|GzZC169|I1S054|5518|Gibberella	30.41	763	361	27	33	793	3	597	5e-82	278
EFW99347	2020|PHI:2020|Tup1|XP_759427|5270|Ustilago	28.18	220	121	9	192	397	465	661	9e-12	65.5
EFW99347	2020|PHI:2020|Tup1|XP_759427|5270|Ustilago	28.81	177	97	7	203	366	567	727	2e-08	55.1
EFW99347	2020|PHI:2020|Tup1|XP_759427|5270|Ustilago	24.81	129	89	2	504	625	501	628	6e-08	53.1
EFW99347	2020|PHI:2020|Tup1|XP_759427|5270|Ustilago	32.52	123	74	6	511	627	419	538	3e-07	50.8
EFW99385	2322|PHI:2322|SidH|Q4WF54|746128|Aspergillus	25.09	267	177	7	130	391	17	265	6e-18	80.5
EFW99204	1455|PHI:1455|GzAra003|I1RKU6|5518|Gibberella	23.8	332	206	15	319	628	22	328	3e-08	53.9
EFW99326	1901|PHI:1901|GzZC216|I1RK07|5518|Gibberella	45.01	411	173	12	58	461	225	589	6e-104	325
EFW99311	1773|PHI:1773|GzZC088|I1S409|5518|Gibberella	24.26	272	172	8	22	287	1	244	3e-14	71.6
EFW99259	510|PHI:510|CaNAG3|EAK93097|5476|Candida	25.54	466	311	6	125	578	108	549	2e-31	126
EFW99376	336|PHI:336|CHS2|AAT77182|5507|Fusarium	69.94	1038	193	13	120	1140	102	1037	0	1446
EFW99330	339|PHI:339|CLPT1|CAC41973|290576|Colletotrichum	40.44	136	81	0	3	138	33	168	2e-31	112
EFW99108	1843|PHI:1843|GzZC158|I1S4X3|5518|Gibberella	21.77	464	283	13	22	413	138	593	3e-20	93.6
EFW99260	3629	27.19	331	207	7	187	506	16	323	5e-25	106
EFW99246	3028	27.31	443	248	19	5	444	39	410	2e-22	96.7
EFW99147	1637|PHI:1637|GzWing009|Q4IEV4|5518|Gibberella	70.02	507	133	7	4	504	9	502	0	713
EFW99164	1573|PHI:1573|GzOB013|I1RFJ2|5518|Gibberella	61.9	1008	262	20	1	940	1	954	0	1179
EFW99251	1210|PHI:1210|FGSG_01058|I1S077|5518|Gibberella	48.86	1670	521	53	17	1657	34	1399	0	1232
EFW99216	319|PHI:319|SQL2|AAO19638|5270|Ustilago	42.59	54	29	1	416	469	88	139	3e-08	53.9
EFW99367	796|PHI:796|MGG_02423|EDJ98620|318829|Magnaporthe	40.47	215	118	3	152	362	4	212	2e-36	133
EFW99242	1547|PHI:1547|GzMyb011|I1RRN6|5518|Gibberella	39.78	372	182	9	234	604	228	558	6e-62	217
EFW99076	2042|PHI:2042|ABC3|Q3Y5V5|148305|Magnaporthe	37.21	1325	754	23	82	1357	26	1321	0	764
EFW99215	2825|PHI:2825|SET1|Q5ABG1|5476|Candida	33.56	146	95	1	173	316	895	1040	2e-20	94.7
EFW99130	3126	27.76	425	215	13	110	511	30	385	3e-27	110
EFW99182	1309|PHI:1309|GzbHLH010|I1RNI6|5518|Gibberella	51.21	330	93	15	54	347	1	298	6e-82	253
EFW99378	2032|PHI:2032|VTL1|G4NGA7|148305|Magnaporthe	30.2	510	289	23	39	521	43	512	1e-37	144
EFW99114	1675|PHI:1675|GzDHHC003|Q4I8B6|5518|Gibberella	27.06	218	123	5	351	568	58	239	5e-09	56.2
EFW99114	1675|PHI:1675|GzDHHC003|Q4I8B6|5518|Gibberella	27.81	169	120	2	396	564	36	202	5e-07	49.7
EFW99065	1841|PHI:1841|GzZC156|I1RIY6|5518|Gibberella	23.61	377	233	11	222	570	209	558	8e-16	78.6
EFW99187	1866|PHI:1866|GzZC181|I1S5J4|5518|Gibberella	75.97	129	31	0	362	490	45	173	6e-68	226
EFW99187	1866|PHI:1866|GzZC181|I1S5J4|5518|Gibberella	46.96	115	60	1	646	760	180	293	3e-28	114
EFW99374	423|PHI:423|VAD1|AAV41010|5207|Cryptococcus	34.26	359	214	8	62	414	36	378	6e-63	216
EFW99324	2141|PHI:2141|CDC15|XP_001406795|148305|Magnaporthe	25	208	142	5	30	234	42	238	4e-09	57.4
EFW99224	434|PHI:434|GEL2|EAL88984|5085|Aspergillus	39.85	394	204	12	6	381	2	380	2e-82	263
EFW99122	1556|PHI:1556|GzNH001|I1RZY2|5518|Gibberella	39.76	166	67	2	296	461	28	160	7e-33	122
EFW99358	1602|PHI:1602|GzOB043|I1RZY1|5518|Gibberella	64.42	711	173	5	1	671	1	671	0	884
EFW99202	231|PHI:231|RPK1|AAK31209|5462|Colletotrichum	70.92	392	108	3	6	394	2	390	0	552
EFW99290	1458|PHI:1458|GzAra006|Q4I7F9|5518|Gibberella	29.6	446	250	14	171	608	301	690	3e-38	150
EFW99084	2257|PHI:2257|Pbl1|Q0UHM8|13684|Phaeosphaeria	55.97	352	142	7	24	374	42	381	3e-115	342
EFW99316	1260|PHI:1260|FGSG_13944|I1RUC7|5518|Gibberella	27.89	190	134	2	1	190	454	640	1e-14	69.7
EFW99316	1260|PHI:1260|FGSG_13944|I1RUC7|5518|Gibberella	28.39	155	108	2	33	187	453	604	4e-13	65.1
EFW99316	1260|PHI:1260|FGSG_13944|I1RUC7|5518|Gibberella	30.71	140	94	2	65	204	452	588	2e-11	60.1
EFW99340	2279|PHI:2279|Conserved	34.01	247	138	7	1	225	30	273	4e-39	137
EFW99125	2837|PHI:2837|OXI1|D2SZX7|5016|Cochliobolus	34.85	198	97	6	77	272	64	231	2e-23	94.4
EFW99361	716|PHI:716|ZEB1|ABB90284|5518|Fusarium	29.51	183	117	6	35	208	113	292	1e-09	58.2
EFW99176	301|PHI:301|foSNF1|AAN32715|5507|Fusarium	63.31	755	212	14	1	739	1	706	0	923
EFW99083	1218|PHI:1218|FGSG_01559|I1RAY2|5518|Gibberella	89.47	342	34	1	1	342	1	340	0	584
EFW99360	1471|PHI:1471|GzHMG003|I1RAY3|5518|Gibberella	34.75	118	74	2	44	161	1	115	1e-12	68.9
EFW99110	2074|PHI:2074|Moatg6|MGG_03694|148305|Magnaporthe	64.59	418	128	4	1	418	94	491	0	530
EFW99201	2474|PHI:2474|imd1|E3P6S0|5207|Cryptococcus	64.29	532	184	5	17	544	15	544	0	686
EFW99132	3278	23.45	290	181	9	1059	1346	1048	1298	1e-10	64.3
EFW99081	3039	51.41	992	364	29	4	924	7	951	0	811
EFW99111	1531|PHI:1531|GzSsu72|Q4IPC8|5518|Gibberella	78.11	233	51	0	18	250	23	255	9e-145	407
EFW99155	2336|PHI:2336|NIA1|O00101|13684|Stagonospora	27.73	256	153	6	39	278	650	889	6e-25	102
EFW99141	267|PHI:267|MLT1|AAD51594|5476|Candida	28.44	1526	838	46	138	1502	174	1606	8e-152	504
EFW99313	2020|PHI:2020|Tup1|XP_759427|5270|Ustilago	23.21	237	125	7	17	203	466	695	5e-11	63.2
EFW99335	1251|PHI:1251|FGSG_09150|I1RD19|5518|Gibberella	59.96	567	181	10	2	566	4	526	0	669
EFW99175	2433|PHI:2433|FgRgsB|I1RD16|5518|Gibberella	74.52	361	73	5	5	363	6	349	0	539
EFW99300	244|PHI:244|CLAP1|AAN62846|290576|Colletotrichum	72	1193	294	11	1	1185	1	1161	0	1672
EFW99275	167|PHI:167|CHIP3|AAF00024|5457|Colletotrichum	29.94	521	273	15	1	463	78	564	4e-42	156
EFW99098	2186|PHI:2186|PIC5|EHA49812	70.98	255	74	0	1	255	1	255	4e-127	364
EFW99074	1835|PHI:1835|GzZC150|I1RIL1|5518|Gibberella	48.03	635	299	11	210	840	21	628	0	587
EFW99231	200|PHI:200|ARG1|BAB40769|5507|Fusarium	84.8	467	71	0	1	467	1	467	0	843
EFW99217	1662|PHI:1662|GzCCHC002|I1REJ1|5518|Gibberella	27.39	398	273	8	76	467	688	1075	4e-35	138
EFW99123	1662|PHI:1662|GzCCHC002|I1REJ1|5518|Gibberella	30.77	507	295	13	39	513	630	1112	3e-63	224
EFW99343	2141|PHI:2141|CDC15|XP_001406795|148305|Magnaporthe	80.99	363	68	1	3	365	7	368	0	630
EFW99343	2141|PHI:2141|CDC15|XP_001406795|148305|Magnaporthe	49.04	675	211	25	329	961	429	1012	3e-143	454
EFW99274	697|PHI:697|ugt51E1|AAM81358|5022|Leptosphaeria	28.05	328	202	15	129	437	82	394	9e-25	102
EFW99267	881|PHI:881|MGG_04556|EDJ96020|318829|Magnaporthe	30.59	340	191	13	7	340	6	306	1e-33	126
EFW99369	2117|PHI:2117|SPM1|P58371|148305|Magnaporthe	70.51	546	149	2	1	546	1	534	0	765
EFW99129	2097|PHI:2097|Neo1|MGG_04066|148305|Magnaporthe	24.77	1175	668	27	342	1424	265	1315	3e-86	307
EFW99129	2097|PHI:2097|Neo1|MGG_04066|148305|Magnaporthe	25.33	225	130	6	122	311	114	335	8e-09	57.8
EFW99373	429|PHI:429|ClPLS1|CAD43407|290576|Colletotrichum	60.45	220	87	0	76	295	1	220	8e-97	286
EFW99102	1978|PHI:1978|GzZC293|I1RLK0|5518|Gibberella	22.11	588	327	16	6	584	9	474	4e-30	122
EFW99323	2968|PHI:2968|Hxs1|J9VQA5|5207|Cryptococcus	25.71	490	319	13	56	530	48	507	1e-35	137
EFW99228	3355	72.07	222	52	2	1	212	1	222	1e-101	295
EFW99214	2154|PHI:2154|RBP35|MGG_02741|148305|Magnaporthe	57.08	226	81	7	1	219	1	217	3e-68	228
EFW99120	2020|PHI:2020|Tup1|XP_759427|5270|Ustilago	21.98	323	191	10	198	508	419	692	4e-12	66.6
EFW99120	2020|PHI:2020|Tup1|XP_759427|5270|Ustilago	30.3	132	76	4	291	414	411	534	7e-11	62.4
EFW99183	1550|PHI:1550|GzMyb014|I1RWN5|5518|Gibberella	48.21	336	128	10	290	617	223	520	1e-84	276
EFW99183	1550|PHI:1550|GzMyb014|I1RWN5|5518|Gibberella	39.34	211	94	11	1	195	1	193	3e-21	95.1
EFW99077	1410|PHI:1410|GzC2H076|I1RYG0|5518|Gibberella	45.19	343	118	11	20	350	13	297	5e-66	211
EFW99109	1236|PHI:1236|FGSG_04770|I1RYF8|5518|Gibberella	55.29	841	233	22	60	885	3	715	0	824
EFW99104	2976|PHI:2976|CgOPT1|C6ZRH8|29905|Colletotrichum	47.54	711	363	6	38	742	21	727	0	690
EFW99336	3283	35.43	127	57	6	452	564	4	119	1e-07	52
EFW99368	2528|PHI:2528|SLY1|Q4WYU7|746128|Aspergillus	60.22	744	235	11	3	727	11	712	0	889
EFW99167	1458|PHI:1458|GzAra006|Q4I7F9|5518|Gibberella	29.91	438	215	14	159	537	286	690	2e-45	170
EFW99097	2267|PHI:2267|Mls1|0|13684|Phaeosphaeria	78	541	119	0	2	542	3	543	0	910
EFW99380	1434|PHI:1434|GzC2H103|I1S8Y5|5518|Gibberella	51.63	153	52	2	394	546	268	398	4e-40	149
EFW99101	1184|PHI:1184|(Sc	35.09	989	494	31	296	1202	213	1135	2e-146	472
EFW99101	1184|PHI:1184|(Sc	46.64	223	100	7	4	216	10	223	8e-43	167
EFW99146	1500|PHI:1500|GzHMG032|I1S2F2|5518|Gibberella	25.48	157	103	8	95	237	208	364	2e-08	55.8
EFW99159	423|PHI:423|VAD1|AAV41010|5207|Cryptococcus	37.38	420	246	8	21	439	8	411	5e-76	249
EFW99679	716|PHI:716|ZEB1|ABB90284|5518|Fusarium	51.19	84	41	0	1	84	480	563	2e-27	102
EFW99676	544|PHI:544|BCMFS1|AAF64435|332648|Botrytis	23.15	406	292	10	19	415	57	451	6e-13	68.6
EFW99677	3126	30.15	335	200	9	49	383	41	341	3e-35	138
EFW99682	3090	29.79	1561	925	51	32	1541	491	1931	7e-152	516
EFW99680	1746|PHI:1746|GzZC061|I1RWV5|5518|Gibberella	37.92	509	281	10	116	601	394	890	6e-97	317
EFX05750	2601|PHI:2601|Asc1|P83774|746128|Aspergillus	23.91	230	158	8	207	422	72	298	3e-07	50.8
EFX05336	2310|PHI:2310|VGB|I2DB61|27337|Verticillium	23.94	284	169	11	226	503	116	358	1e-12	67.8
EFX05982	2644|PHI:2644|thioredoxin	33.33	87	56	1	3	89	5	89	3e-17	70.9
EFX05547	3019	25.36	1104	645	35	10	993	21	1065	9e-69	251
EFX06179	1576|PHI:1576|GzOB016|I1RJY5|5518|Gibberella	28.36	469	280	17	97	550	89	516	2e-42	157
EFX05739	404|PHI:404|PTH11|AAD30436|318829|Magnaporthe	28.05	221	121	7	6	191	192	409	8e-13	64.7
EFX05407	784|PHI:784|MGG_00056|EDK03390|318829|Magnaporthe	29.06	234	137	7	5	229	13	226	5e-18	79.7
EFX05556	1553|PHI:1553|GzMyb017|I1S7F8|5518|Gibberella	74.29	385	60	1	729	1074	1	385	1e-177	533
EFX05623	4194	23.34	377	241	14	153	510	131	478	7e-16	77.8
EFX06126	1662|PHI:1662|GzCCHC002|I1REJ1|5518|Gibberella	27.27	220	150	4	25	244	653	862	1e-19	89.7
EFX05906	2315|PHI:2315|ChLae1|G4XKY9|5016|Cochliobolus	41.62	173	95	4	52	219	3	174	2e-38	136
EFX05555	2042|PHI:2042|ABC3|Q3Y5V5|148305|Magnaporthe	28.01	532	347	12	376	892	807	1317	2e-49	187
EFX05555	2042|PHI:2042|ABC3|Q3Y5V5|148305|Magnaporthe	36.24	287	154	7	653	913	367	650	8e-41	160
EFX05205	465|PHI:465|KIN2|AAB63337|5270|Ustilago	33.62	348	203	12	2	339	4	333	1e-37	149
EFX05682	1528|PHI:1528|GzHOMEL041|I1SAN0|5518|Gibberella	29.4	381	194	5	1362	1737	512	822	7e-51	195
EFX05699	1785|PHI:1785|GzZC100|I1S231|5518|Gibberella	43.7	508	253	7	245	731	17	512	6e-142	428
EFX05362	2839|PHI:2839|RED1|Q8NJQ2|5016|Cochliobolus	36.58	339	196	9	20	348	19	348	6e-57	189
EFX06014	455|PHI:455|CAP59|AAC13946|5207|Cryptococcus	33.22	286	161	9	109	380	80	349	2e-36	137
EFX05264	441|PHI:441|BTP1|CAE55153|40559|Botrytis	27.03	344	217	9	31	341	43	385	8e-34	128
EFX05467	2909|PHI:2909|CYP51C|I1S2M5|5518|Fusarium	24.21	285	198	8	275	552	243	516	1e-09	57.8
EFX05509	2020|PHI:2020|Tup1|XP_759427|5270|Ustilago	29.41	187	110	5	109	295	463	627	8e-13	70.1
EFX05430	2644|PHI:2644|thioredoxin	30.56	108	68	3	24	130	5	106	7e-11	58.2
EFX05430	2644|PHI:2644|thioredoxin	34.18	79	44	3	365	440	12	85	2e-07	48.1
EFX05258	3630	39.23	339	179	11	147	475	128	449	3e-59	214
EFX05441	510|PHI:510|CaNAG3|EAK93097|5476|Candida	28.04	189	133	2	49	236	113	299	7e-14	70.9
EFX05593	1321|PHI:1321|ZEB2|I1RFC6|5518|Gibberella	52.78	36	17	0	57	92	16	51	2e-07	48.9
EFX05476	517|PHI:517|CaEAP1|EAK95520|5476|Candida	27.42	186	123	6	2199	2381	314	490	3e-08	56.6
EFX05476	517|PHI:517|CaEAP1|EAK95520|5476|Candida	29.84	191	110	7	2214	2381	346	535	4e-08	55.8
EFX05366	2549|PHI:2549|MAK5|Q4WMS3|746128|Aspergillus	51.53	619	247	13	45	632	37	633	0	552
EFX05366	2549|PHI:2549|MAK5|Q4WMS3|746128|Aspergillus	51.08	139	66	2	716	853	640	777	3e-29	122
EFX06134	383|PHI:383|SOD5|EAL00626|5476|Candida	31.6	231	130	7	32	252	16	228	7e-26	100
EFX06142	3314	46.39	194	84	11	119	293	265	457	2e-32	123
EFX06142	3314	40.16	122	55	5	1	110	32	147	3e-15	73.2
EFX06150	213|PHI:213|CPA1|AAF69795|5207|Cryptococcus	50	126	59	3	552	673	16	141	1e-33	125
EFX05317	1925|PHI:1925|GzZC240|I1RH59|5518|Gibberella	32.59	135	77	5	10	133	18	149	6e-12	66.6
EFX05402	2644|PHI:2644|thioredoxin	29.73	74	49	1	26	99	24	94	2e-07	46.2
EFX05344	397|PHI:397|LAC2|AAV64894|5207|Cryptococcus	28.98	628	356	17	106	707	15	578	6e-76	256
EFX05651	1920|PHI:1920|GzZC235|I1RCK0|5518|Gibberella	56.25	768	261	9	1	732	85	813	0	805
EFX05587	1352|PHI:1352|GzC2H012|I1RCK1|5518|Gibberella	36.33	991	500	25	34	981	56	958	3e-171	551
EFX05883	812|PHI:812|MGG_10702|EDJ94108|318829|Magnaporthe	28.18	362	233	13	17	358	15	369	4e-23	97.8
EFX05944	3060	23.29	219	105	7	776	989	89	249	4e-12	67.8
EFX05944	3060	29.7	101	64	2	902	998	97	194	3e-08	55.1
EFX05987	1819|PHI:1819|GzZC134|I1S7J0|5518|Gibberella	37.4	254	145	5	126	375	2	245	2e-41	149
EFX05618	1279|PHI:1279|FGSG_12132|I1RU59|5518|Gibberella	25.84	329	198	9	73	369	267	581	3e-16	80.5
EFX05909	1273|PHI:1273|FGSG_05549|I1RCM6|5518|Gibberella	51.26	1309	402	27	1	1163	1	1219	0	1200
EFX05835	3793	45.91	342	162	9	124	463	5	325	3e-96	295
EFX05438	1344|PHI:1344|GzC2H004|I1RAQ0|5518|Gibberella	41.41	1048	449	38	12	997	21	965	0	611
EFX05803	1466|PHI:1466|GzCCAAT006|I1RSG9|5518|Gibberella	50.79	254	42	8	1	251	25	198	3e-62	195
EFX05284	469|PHI:469|TOXG|AAD47837|5017|Cochliobolus	45.29	340	186	0	581	920	22	361	2e-90	293
EFX05473	4575	32.89	672	334	15	78	672	28	659	3e-104	334
EFX05400	339|PHI:339|CLPT1|CAC41973|290576|Colletotrichum	29.45	146	85	4	80	216	38	174	6e-10	54.3
EFX05790	3301	23.98	196	128	5	7	199	12	189	1e-09	54.7
EFX05243	2114|PHI:2114|Calnexin|MGG_01607|148305|Magnaporthe	71.92	577	144	4	1	560	1	576	0	805
EFX05374	434|PHI:434|GEL2|EAL88984|5085|Aspergillus	54.63	421	188	2	7	426	8	426	2e-161	468
EFX05851	1312|PHI:1312|GzbHLH013|I1RVV8|5518|Gibberella	40.33	491	235	9	734	1197	452	911	2e-97	332
EFX05851	1312|PHI:1312|GzbHLH013|I1RVV8|5518|Gibberella	58.2	366	104	9	266	624	126	449	8e-95	324
EFX05385	3179	58.62	1114	315	22	1	1034	1	1048	0	1151
EFX06169	1956|PHI:1956|GzZC271|I1RLT2|5518|Gibberella	31.98	688	354	17	23	662	5	626	4e-111	353
EFX05479	1260|PHI:1260|FGSG_13944|I1RUC7|5518|Gibberella	38.3	235	130	1	719	953	421	640	2e-30	125
EFX05479	1260|PHI:1260|FGSG_13944|I1RUC7|5518|Gibberella	39.79	191	115	0	694	884	447	637	1e-26	114
EFX05479	1260|PHI:1260|FGSG_13944|I1RUC7|5518|Gibberella	35.65	216	133	1	642	851	422	637	5e-23	102
EFX06072	2315|PHI:2315|ChLae1|G4XKY9|5016|Cochliobolus	36.4	239	140	6	66	298	3	235	3e-41	147
EFX06109	502|PHI:502|ADE4|CAA89133|4932|Saccharomyces	50.29	513	212	12	1	493	1	490	9e-159	464
EFX06122	1555|PHI:1555|GzMyb019|I1RDG6|5518|Gibberella	22.47	494	323	10	31	486	73	544	4e-30	120
EFX05270	3381	34.09	443	288	4	162	603	201	640	3e-74	251
EFX05825	1555|PHI:1555|GzMyb019|I1RDG6|5518|Gibberella	40.84	546	313	5	15	553	1	543	2e-150	444
EFX05937	2020|PHI:2020|Tup1|XP_759427|5270|Ustilago	24.68	308	173	12	3	288	454	724	2e-10	58.9
EFX06078	801|PHI:801|MGG_04621|EDJ95977|318829|Magnaporthe	21.17	222	101	2	449	596	344	565	7e-11	62.4
EFX05787	2067|PHI:2067|ABC4|MGG_00937|148305|Magnaporthe	54.91	1699	668	22	3	1655	1	1647	0	1778
EFX05980	244|PHI:244|CLAP1|AAN62846|290576|Colletotrichum	29.29	990	551	29	248	1193	214	1098	2e-92	322
EFX05980	244|PHI:244|CLAP1|AAN62846|290576|Colletotrichum	29.1	134	83	4	248	377	32	157	8e-08	53.9
EFX05810	2050|PHI:2050|OMO1|BK005770|148305|Magnaporthe	56.51	538	170	11	6	520	64	560	0	585
EFX05497	3607	26	2696	1673	102	2074	4642	2028	4528	2e-176	613
EFX05497	3607	26.9	2182	1307	83	124	2133	288	2353	1e-145	512
EFX05497	3607	29.14	1081	663	40	1118	2138	2429	3466	7e-95	344
EFX05497	3607	25.2	1242	788	37	2157	3338	1000	2160	2e-84	310
EFX05497	3607	24.12	1053	673	36	141	1116	2532	3535	2e-57	220
EFX05497	3607	24.61	1081	668	41	2494	3501	220	1226	1e-52	204
EFX05497	3607	24.06	478	325	13	1685	2141	3563	4023	3e-25	114
EFX05497	3607	24.51	461	316	12	603	1044	3566	4013	3e-24	110
EFX05497	3607	24.39	410	278	14	1692	2078	4128	4528	1e-17	88.6
EFX05497	3607	24.06	453	301	17	3099	3521	4147	4586	9e-15	79.3
EFX05497	3607	23.36	428	263	13	3664	4057	801	1197	2e-12	72
EFX05497	3607	24.28	416	276	15	599	988	4124	4526	5e-10	63.5
EFX05497	3607	21.88	608	389	24	3665	4239	1912	2466	2e-09	61.6
EFX05239	1178|PHI:1178|(Sc	81.23	325	61	0	1	325	1	325	0	555
EFX06028	184|PHI:184|RBT4|AAG09789|5476|Candida	34.78	138	84	4	37	171	206	340	3e-22	90.9
EFX06176	1662|PHI:1662|GzCCHC002|I1REJ1|5518|Gibberella	28.9	263	176	4	32	294	640	891	5e-32	125
EFX05617	191|PHI:191|TOM1|AAB08446|39703|Septoria	27.74	447	234	12	8	371	52	492	7e-43	165
EFX05617	191|PHI:191|TOM1|AAB08446|39703|Septoria	33.46	272	146	9	571	815	521	784	9e-31	127
EFX05472	256|PHI:256|GAS1|AAK52794|318829|Magnaporthe	32.2	118	68	5	4	114	2	114	1e-07	46.2
EFX06075	2506|PHI:2506|Amr1|G3F820|29001|Alternaria	33.67	98	60	2	57	151	659	754	1e-07	51.2
EFX05638	1662|PHI:1662|GzCCHC002|I1REJ1|5518|Gibberella	33.26	469	288	7	41	494	617	1075	1e-78	269
EFX05775	26|PHI:26|CaMDR1|CAA37820|5476|Candida	22.34	385	259	11	40	406	102	464	2e-07	50.1
EFX05326	438|PHI:438|BcBOT1	25.05	459	284	14	29	448	44	481	2e-21	94.4
EFX05848	1327|PHI:1327|GzbZIP009|I1RQS2|5518|Gibberella	48.03	127	62	1	72	198	16	138	3e-28	117
EFX05848	1327|PHI:1327|GzbZIP009|I1RQS2|5518|Gibberella	26.04	384	216	9	330	656	225	597	1e-24	106
EFX05933	1414|PHI:1414|GzC2H081|I1RZL0|5518|Gibberella	49.28	69	34	1	2	69	18	86	1e-12	65.1
EFX05826	1676|PHI:1676|GzDHHC004|Q4I2M7|5518|Gibberella	29.3	157	85	5	152	308	462	592	3e-16	78.2
EFX05320	4194	26.88	506	311	18	20	509	14	476	1e-42	158
EFX05334	1167|PHI:1167|NPC1|I1RY25|5518|Gibberella	62.9	1291	444	9	11	1294	10	1272	0	1628
EFX05466	2654|PHI:2654|DUR1,2|Q59VF3|5476|Candida	31.82	198	127	3	187	381	69	261	3e-17	83.6
EFX05359	3381	38.68	455	273	4	113	564	188	639	4e-89	290
EFX05557	144|PHI:144|CHT42|AAC05829|29875|Trichoderma	28.57	308	160	10	147	433	122	390	4e-18	84
EFX05736	2336|PHI:2336|NIA1|O00101|13684|Stagonospora	28.57	343	203	9	156	462	548	884	2e-34	135
EFX05736	2336|PHI:2336|NIA1|O00101|13684|Stagonospora	40.54	74	43	1	6	79	537	609	4e-10	59.3
EFX05854	2908|PHI:2908|CYP51B|I1RBR4|5518|Fusarium	30.04	223	132	6	322	521	277	498	7e-18	84
EFX06035	3385	50	422	210	1	16	436	9	430	3e-151	440
EFX05807	143|PHI:143|CHT|AAA33353|5563|Gloeocercospora	26.01	323	188	7	16	311	9	307	4e-19	87.8
EFX05905	2597|PHI:2597|Pir32|Q59PW0	45.68	451	195	10	12	431	19	450	1e-122	368
EFX05582	3389	37.61	444	194	9	7	403	6	413	9e-79	254
EFX06048	901|PHI:901|um01886||5270|Ustilago	23.78	513	285	19	42	536	165	589	3e-19	89
EFX05664	2976|PHI:2976|CgOPT1|C6ZRH8|29905|Colletotrichum	28.44	668	440	11	20	672	53	697	1e-80	273
EFX05269	1893|PHI:1893|GzZC208|I1RNY0|5518|Gibberella	28.03	314	193	13	62	368	132	419	6e-17	81.6
EFX06132	1435|PHI:1435|GzC2H104|I1S9G1|5518|Gibberella	25.65	464	278	16	553	998	253	667	7e-26	111
EFX06132	1435|PHI:1435|GzC2H104|I1S9G1|5518|Gibberella	36.78	87	53	1	375	459	247	333	2e-09	58.5
EFX05903	2089|PHI:2089|Moatg28|MGG_08061|148305|Magnaporthe	37.77	736	345	20	1	716	1	643	1e-113	358
EFX05805	3134	45.23	482	245	7	30	510	1	464	5e-124	373
EFX05704	2020|PHI:2020|Tup1|XP_759427|5270|Ustilago	22.82	241	148	8	380	619	478	681	1e-07	52
EFX06054	2058|PHI:2058|LHS1|MGG_06648.5|148305|Magnaporthe	27.12	424	255	11	10	385	25	442	1e-30	125
EFX05506	144|PHI:144|CHT42|AAC05829|29875|Trichoderma	31.27	355	208	8	18	349	39	380	1e-47	166
EFX05972	2256|PHI:2256|Xdh1|Q0UA24|13684|Phaeosphaeria	63.71	350	126	1	22	371	14	362	2e-165	469
EFX06172	339|PHI:339|CLPT1|CAC41973|290576|Colletotrichum	41.35	133	74	1	27	159	7	135	2e-31	117
EFX05600	784|PHI:784|MGG_00056|EDK03390|318829|Magnaporthe	28.51	235	137	8	3	226	14	228	8e-12	61.6
EFX05940	1159|PHI:1159|MgAtr7|A5H456|54734|Mycosphaerella	56.85	336	135	2	12	340	2	334	6e-115	398
EFX05726	513|PHI:513|ARN1	25	572	400	10	53	608	18	576	4e-36	140
EFX05632	1936|PHI:1936|GzZC251|I1RFG1|5518|Gibberella	29.12	577	310	17	21	528	8	554	2e-56	202
EFX05419	981|PHI:981|hopI1|AAL84247|59511|Pseudomonas	37.31	67	41	1	6	71	355	421	1e-08	54.3
EFX05285	1555|PHI:1555|GzMyb019|I1RDG6|5518|Gibberella	38.16	490	281	4	40	510	57	543	2e-113	366
EFX06092	419|PHI:419|CSH1|AAP93915|5476|Candida	29.35	310	188	10	23	319	7	298	5e-26	103
EFX05966	1887|PHI:1887|GzZC202|I1RHZ6|5518|Gibberella	27.69	520	316	13	16	510	31	515	2e-51	187
EFX05500	1501|PHI:1501|GzHMG033|I1S4R6|5518|Gibberella	46.12	258	107	4	393	650	222	447	3e-59	206
EFX05259	2058|PHI:2058|LHS1|MGG_06648.5|148305|Magnaporthe	24.82	427	272	9	1	381	19	442	1e-31	129
EFX05574	2616|PHI:2616|InlA|Q2L8G9|1639|Listeria	28.91	377	231	17	1634	1983	48	414	2e-15	79.7
EFX05396	1475|PHI:1475|GzHMG007|I1RBB7|5518|Gibberella	43.7	341	149	7	2	340	42	341	9e-76	259
EFX05396	1475|PHI:1475|GzHMG007|I1RBB7|5518|Gibberella	26.98	215	118	4	612	826	493	668	4e-20	92.8
EFX05602	2020|PHI:2020|Tup1|XP_759427|5270|Ustilago	24.74	287	162	11	99	367	478	728	3e-14	72
EFX06066	2601|PHI:2601|Asc1|P83774|746128|Aspergillus	25.58	215	140	5	65	260	31	244	1e-09	57.8
EFX05519	2178|PHI:2178|MoSFl1|MGG_06971|148305|Magnaporthe	60.26	614	195	20	23	622	5	583	0	633
EFX05733	2802|PHI:2802|3hnr|B2ZRQ4|93612|Setosphaeria	24.75	202	137	5	7	206	12	200	8e-10	55.8
EFX05843	1238|PHI:1238|FGSG_06970|I1S1V3|5518|Gibberella	60.31	829	269	18	1	805	1	793	0	908
EFX05373	339|PHI:339|CLPT1|CAC41973|290576|Colletotrichum	60.2	201	78	2	2	202	4	202	1e-85	253
EFX06125	2911|PHI:2911|Ss-pth2|A7F6V9|5180|Sclerotinia	30.7	531	313	18	73	592	59	545	4e-63	223
EFX05778	2336|PHI:2336|NIA1|O00101|13684|Stagonospora	28.97	107	70	2	8	114	537	637	8e-09	54.7
EFX05928	2544|PHI:2544|PAB1|Q4WK03|746128|Aspergillus	31.61	174	109	4	211	383	142	306	7e-19	87.8
EFX05928	2544|PHI:2544|PAB1|Q4WK03|746128|Aspergillus	22.94	231	121	4	211	388	235	461	5e-11	62.8
EFX05278	1325|PHI:1325|GzbZIP007|I1RMI1|5518|Gibberella	45.21	292	110	10	4	275	6	267	2e-69	218
EFX05637	1653|PHI:1653|GzWing026|I1S2A0|5518|Gibberella	60.63	127	37	1	41	167	5	118	1e-48	154
EFX06141	3176	44.14	1332	552	33	36	1342	41	1205	0	874
EFX05764	1799|PHI:1799|GzZC114|I1RBN6|5518|Gibberella	54.59	894	311	17	24	905	5	815	0	918
EFX05340	3071	30.17	232	100	10	41	264	72	249	7e-16	74.7
EFX05222	2171|PHI:2171|Peroxisomal	38.55	677	364	23	3	656	31	678	3e-129	404
EFX05800	2968|PHI:2968|Hxs1|J9VQA5|5207|Cryptococcus	24.28	523	367	11	1	509	1	508	5e-37	140
EFX06063	404|PHI:404|PTH11|AAD30436|318829|Magnaporthe	25.1	259	146	5	63	321	159	369	1e-21	93.2
EFX05658	2825|PHI:2825|SET1|Q5ABG1|5476|Candida	57.77	251	81	3	1206	1450	809	1040	3e-81	288
EFX05658	2825|PHI:2825|SET1|Q5ABG1|5476|Candida	28.28	99	66	2	513	610	420	514	3e-08	55.5
EFX06086	213|PHI:213|CPA1|AAF69795|5207|Cryptococcus	61.88	160	60	1	38	197	4	162	7e-65	202
EFX05523	423|PHI:423|VAD1|AAV41010|5207|Cryptococcus	31.22	410	238	6	104	512	31	397	1e-53	196
EFX05743	1959|PHI:1959|GzZC274|I1RM85|5518|Gibberella	67.21	613	181	4	86	695	14	609	0	846
EFX05288	3354	28.89	135	93	2	137	271	2995	3126	1e-13	70.5
EFX05356	19|PHI:19|NMT|AAA17547|5207|Cryptococcus	46.45	493	220	11	110	563	4	491	6e-146	431
EFX06115	543|PHI:543|BCATRD|CAC41639|40559|Botrytis	57.16	1410	577	10	54	1445	78	1478	0	1671
EFX06115	543|PHI:543|BCATRD|CAC41639|40559|Botrytis	21.42	677	441	26	824	1453	166	798	2e-20	95.5
EFX06151	1816|PHI:1816|GzZC131|I1RRS3|5518|Gibberella	23.43	478	297	12	272	739	316	734	1e-22	101
EFX05816	2532|PHI:2532|HEM15|Q4WUA3|746128|Aspergillus	69.63	428	117	5	1	424	1	419	0	607
EFX05220	3328	55.47	676	262	10	9	684	9	645	0	708
EFX05503	26|PHI:26|CaMDR1|CAA37820|5476|Candida	35.56	509	281	8	159	659	94	563	1e-91	296
EFX05918	2104|PHI:2104|Vacuolar	61.44	612	175	10	6	567	5	605	0	652
EFX06053	1655|PHI:1655|GzWing028|I1S9V9|5518|Gibberella	47.78	1963	785	46	60	1986	35	1793	0	1686
EFX05872	783|PHI:783|MGG_04163|EDJ99464|318829|Magnaporthe	46.06	1407	582	44	1	1350	1	1287	0	958
EFX05235	1974|PHI:1974|GzZC289|I1RQN6|5518|Gibberella	37.84	111	49	2	1	111	1	91	1e-16	81.3
EFX05235	1974|PHI:1974|GzZC289|I1RQN6|5518|Gibberella	22.37	371	250	11	175	527	90	440	2e-11	64.7
EFX05934	249|PHI:249|CYP1|AAG13968|318829|Magnaporthe	48.44	128	59	4	325	446	69	195	3e-25	102
EFX05956	2020|PHI:2020|Tup1|XP_759427|5270|Ustilago	24.44	266	136	8	255	502	470	688	3e-18	85.5
EFX05956	2020|PHI:2020|Tup1|XP_759427|5270|Ustilago	31.53	111	52	2	238	324	578	688	2e-08	53.9
EFX05525	3257	72.81	548	128	1	57	583	74	621	0	825
EFX05688	2989|PHI:2989|MGG_06243.6|G4N8I4|148305|Magnaporthe	61.54	1027	312	21	200	1209	134	1094	0	1176
EFX05815	339|PHI:339|CLPT1|CAC41973|290576|Colletotrichum	32.38	210	121	1	12	221	11	199	2e-33	120
EFX06030	824|PHI:824|GyrA|BAC98434|337|Burkholderia	26.93	375	206	17	832	1167	32	377	3e-19	92
EFX05204	1612|PHI:1612|GzP53L005|I1RZ82|5518|Gibberella	48.98	343	140	11	100	437	1	313	2e-72	231
EFX06180	504|PHI:504|LEU2|CAA42366|4932|Saccharomyces	32.43	370	204	17	8	355	6	351	5e-39	142
EFX05575	1892|PHI:1892|GzZC207|I1RRH8|5518|Gibberella	45.33	492	248	8	396	878	307	786	7e-141	439
EFX05575	1892|PHI:1892|GzZC207|I1RRH8|5518|Gibberella	27.97	311	181	14	14	298	17	310	2e-12	67.8
EFX06137	1381|PHI:1381|GzC2H044|I1RRI0|5518|Gibberella	41.14	299	137	6	228	526	251	510	5e-68	229
EFX06105	126|PHI:126|SAP5|CAA82923|5476|Candida	36.41	357	196	12	60	415	90	416	7e-48	170
EFX05713	3028	25.3	249	156	8	49	284	67	298	5e-11	61.2
EFX05969	2693|PHI:2693|GcABC-G1|F0XP73|226899|Grosmannia	36.4	283	164	8	351	622	874	1151	5e-42	165
EFX05969	2693|PHI:2693|GcABC-G1|F0XP73|226899|Grosmannia	28.74	261	153	5	383	623	209	456	2e-25	111
EFX05969	2693|PHI:2693|GcABC-G1|F0XP73|226899|Grosmannia	23.18	233	173	2	844	1076	536	762	2e-13	72.4
EFX05969	2693|PHI:2693|GcABC-G1|F0XP73|226899|Grosmannia	24.42	217	157	3	845	1055	1209	1424	3e-10	61.6
EFX05453	1070|PHI:1070|MIG1|ABX79379|318829|Magnaporthe	62.17	230	74	6	1	228	1	219	1e-69	239
EFX05859	2017|PHI:2017|COM1|MGG_01215|148305|Magnaporthe	35.3	847	362	35	1	775	1	733	3e-88	295
EFX05749	2552|PHI:2552|NOP4|Q4WNM3|746128|Aspergillus	32.99	194	112	6	692	873	49	236	6e-16	79.7
EFX06178	190|PHI:190|TEC1|EAL04411|5476|Candida	42.86	77	32	1	204	280	184	248	2e-10	62
EFX05652	213|PHI:213|CPA1|AAF69795|5207|Cryptococcus	62.91	151	49	2	14	164	4	147	1e-62	192
EFX05432	2382|PHI:2382|Upa2|Q6QIY0|5270|Ustilago	41.99	281	161	2	222	501	9	288	7e-76	243
EFX05752	3162	46.06	1459	635	31	202	1639	39	1366	0	1172
EFX05276	1427|PHI:1427|GzC2H095|I1S4N1|5518|Gibberella	57.14	308	105	9	510	813	1	285	2e-101	317
EFX05910	2255|PHI:2255|Abd1|Q0U2A0|13684|Phaeosphaeria	65.17	379	116	3	8	386	9	371	0	521
EFX05653	3415	27.68	419	250	13	114	519	154	532	5e-39	149
EFX05505	1638|PHI:1638|GzWing010|I1RN27|5518|Gibberella	53.51	712	201	20	22	730	29	613	0	634
EFX06000	3126	30.83	373	210	10	30	402	22	346	5e-38	142
EFX06112	346|PHI:346|CRU1|AAN10186|5270|Ustilago	40.06	347	188	5	250	590	236	568	1e-84	277
EFX05773	2654|PHI:2654|DUR1,2|Q59VF3|5476|Candida	38.81	134	79	3	80	212	61	192	2e-12	66.6
EFX05376	441|PHI:441|BTP1|CAE55153|40559|Botrytis	26.83	123	87	2	84	203	115	237	1e-08	53.1
EFX06157	1526|PHI:1526|GzHOMEL036|I1S0J3|5518|Gibberella	28.91	128	75	3	306	431	567	680	7e-08	52.4
EFX05760	1390|PHI:1390|GzC2H053|I1RU53|5518|Gibberella	42.74	117	67	0	1	117	112	228	3e-31	126
EFX05760	1390|PHI:1390|GzC2H053|I1RU53|5518|Gibberella	60	40	16	0	315	354	240	279	3e-10	60.1
EFX05855	1566|PHI:1566|GzOB006|I1RC95|5518|Gibberella	41.94	248	129	4	670	907	116	358	2e-50	184
EFX05328	547|PHI:547|CEL5A|AAT40313|40559|Botrytis	49.84	305	152	1	38	341	119	423	9e-113	335
EFX06013	2527|PHI:2527|SEC31|Q4X0M4|746128|Aspergillus	20.27	222	130	6	271	488	101	279	1e-09	58.2
EFX05899	3126	28.53	382	254	8	43	421	32	397	1e-39	145
EFX05998	438|PHI:438|BcBOT1	22.82	412	270	11	5	379	78	478	2e-20	90.5
EFX05996	144|PHI:144|CHT42|AAC05829|29875|Trichoderma	27.11	284	176	10	194	464	116	381	1e-16	79.7
EFX05824	2322|PHI:2322|SidH|Q4WF54|746128|Aspergillus	50.53	281	126	3	7	287	3	270	1e-94	281
EFX05383	2502|PHI:2502|FgTep1p|I1RM09	53.57	575	210	10	1	549	1	544	0	597
EFX05985	1795|PHI:1795|GzZC110|I1RSX8|5518|Gibberella	23.72	371	239	9	253	609	148	488	2e-18	87
EFX05358	3794	32.21	385	197	11	93	436	129	490	3e-51	184
EFX05857	2260|PHI:2260|PKS1|G8DNT0|45130|Cochliobolus	32.49	754	431	20	63	767	80	804	5e-98	335
EFX05534	713|PHI:713|PKS13	23.78	858	540	26	2	775	856	1683	3e-45	177
EFX06040	1816|PHI:1816|GzZC131|I1RRS3|5518|Gibberella	27.5	509	301	18	211	687	263	735	2e-39	154
EFX05487	144|PHI:144|CHT42|AAC05829|29875|Trichoderma	25.51	294	183	9	231	500	104	385	1e-19	90.1
EFX05422	2393|PHI:2393|Related	29.25	465	290	8	63	520	9	441	1e-56	196
EFX06116	2259|PHI:2259|AAR1|G8DNT1|45130|Cochliobolus	53.83	1163	481	14	4	1133	12	1151	0	1251
EFX06127	2315|PHI:2315|ChLae1|G4XKY9|5016|Cochliobolus	32.78	180	114	5	103	278	70	246	1e-26	104
EFX05925	1880|PHI:1880|GzZC195|I1RJB0|5518|Gibberella	27.7	686	393	18	3	669	13	614	3e-64	224
EFX05667	2240|PHI:2240|Srt1|Q4PBY9|5270|Ustilago	25.79	477	342	7	39	505	17	491	4e-38	144
EFX05486	3457	23.21	517	292	16	58	493	36	528	4e-16	78.2
EFX05707	2171|PHI:2171|Peroxisomal	22.91	454	318	16	339	771	244	686	7e-19	89
EFX05548	3386	20.98	305	191	13	97	376	76	355	4e-07	48.9
EFX05735	2393|PHI:2393|Related	34.88	86	52	3	11	95	357	439	2e-07	45.4
EFX06001	2841|PHI:2841|CnSEC14-2|F6K8L6|5207|Cryptococcus	29.54	281	147	11	54	321	9	251	6e-22	92.4
EFX05323	2270|PHI:2270|Mpd1|Q0U6E8|13684|Phaeosphaeria	57.88	387	161	2	10	395	5	390	1e-158	454
EFX05644	2336|PHI:2336|NIA1|O00101|13684|Stagonospora	25.94	212	121	6	146	334	693	891	6e-12	63.9
EFX05375	1192|PHI:1192|(Sc	53.96	328	136	3	46	373	38	350	9e-119	350
EFX05266	784|PHI:784|MGG_00056|EDK03390|318829|Magnaporthe	31.13	106	66	2	55	153	99	204	4e-09	53.9
EFX05306	2315|PHI:2315|ChLae1|G4XKY9|5016|Cochliobolus	40	290	167	5	102	384	1	290	6e-64	207
EFX06164	211|PHI:211|CaTUP1|AAB63195|5476|Candida	28.28	145	93	3	214	348	320	463	4e-10	58.9
EFX06164	211|PHI:211|CaTUP1|AAB63195|5476|Candida	39.39	99	57	2	250	348	272	367	8e-10	57.8
EFX05683	1237|PHI:1237|FGSG_01058|I1RZ37|5518|Gibberella	69.21	1205	298	17	1	1171	1	1166	0	1592
EFX05911	3095	60.92	435	150	7	1	430	2	421	0	549
EFX05975	1599|PHI:1599|GzOB039|I1RZ39|5518|Gibberella	79.29	140	29	0	44	183	43	182	2e-76	228
EFX05459	404|PHI:404|PTH11|AAD30436|318829|Magnaporthe	29.39	313	189	11	40	332	111	411	2e-27	112
EFX05475	4211	25.32	387	223	10	398	769	187	522	3e-26	112
EFX05213	1552|PHI:1552|GzMyb016|I1S0N5|5518|Gibberella	46.07	280	130	2	145	424	175	433	9e-75	264
EFX05213	1552|PHI:1552|GzMyb016|I1S0N5|5518|Gibberella	51.47	204	87	5	606	806	440	634	8e-52	194
EFX05578	1580|PHI:1580|GzOB020|I1RM35|5518|Gibberella	56.19	404	146	3	5	391	1	390	7e-148	426
EFX05936	1485|PHI:1485|GzHMG017|I1RMP0|5518|Gibberella	54.86	350	133	10	9	354	9	337	2e-111	361
EFX05829	1411|PHI:1411|GzC2H078|I1RZ11|5518|Gibberella	58.58	239	94	4	2	239	4	238	5e-68	211
EFX05942	2196|PHI:2196|MoRgs5|XP_363151|148305|Magnaporthe	29.2	274	179	4	215	481	466	731	7e-33	135
EFX05286	1226|PHI:1226|FGSG_11614|I1RP88|5518|Gibberella	82.53	641	99	7	3	642	2	630	0	1090
EFX06163	167|PHI:167|CHIP3|AAF00024|5457|Colletotrichum	39.68	494	258	7	116	574	77	565	6e-99	313
EFX05838	438|PHI:438|BcBOT1	29.13	206	130	7	313	513	285	479	5e-16	79.7
EFX05379	2488|PHI:2488|Man1|G4ND25|148305|Magnaporthe	30.94	556	292	18	109	621	19	525	4e-46	172
EFX05814	1983|PHI:1983|GzZC298|I1RB90|5518|Gibberella	40	75	45	0	50	124	398	472	2e-12	66.6
EFX05252	404|PHI:404|PTH11|AAD30436|318829|Magnaporthe	26.3	270	185	8	25	286	119	382	3e-17	79.3
EFX05474	3381	30.37	507	341	7	26	525	134	635	1e-59	209
EFX05377	1541|PHI:1541|GzFlbD|I1RE42|5518|Gibberella	33.33	102	66	2	1	101	1	101	3e-11	61.2
EFX05924	3281	27.05	281	185	8	39	308	52	323	4e-16	75.5
EFX06057	1598|PHI:1598|GzOB038|I1RZ35|5518|Gibberella	53.69	149	55	3	1	148	1	136	1e-50	159
EFX05449	2315|PHI:2315|ChLae1|G4XKY9|5016|Cochliobolus	34.04	282	179	5	22	296	9	290	3e-48	163
EFX05698	1133|PHI:1133|Lmepi|B9DR51|5022|Leptosphaeria	70.43	372	107	1	1	369	1	372	0	535
EFX06167	423|PHI:423|VAD1|AAV41010|5207|Cryptococcus	30.77	364	234	8	53	411	38	388	3e-43	164
EFX05494	566|PHI:566|cel2|AAK19621|5017|Cochliobolus	37.19	398	182	9	18	361	27	410	1e-78	251
EFX06019	1579|PHI:1579|GzOB019|I1RM25|5518|Gibberella	67.28	1241	336	15	1	1229	1	1183	0	1662
EFX05532	2547|PHI:2547|ESF1|Q4WHH1|746128|Aspergillus	44.57	709	330	14	25	726	9	661	5e-146	447
EFX05889	3207	20.44	367	263	10	237	585	158	513	1e-15	77.8
EFX05748	2644|PHI:2644|thioredoxin	34.29	105	66	3	36	138	2	105	8e-14	62.4
EFX05907	1516|PHI:1516|GzHOMEL012|I1RMR8|5518|Gibberella	68.42	209	59	2	83	290	46	248	2e-101	312
EFX05907	1516|PHI:1516|GzHOMEL012|I1RMR8|5518|Gibberella	49.58	119	54	4	393	507	288	404	1e-18	85.5
EFX05262	922|PHI:922|um03615||5270|Ustilago	32.28	632	358	22	12	616	84	672	7e-73	248
EFX05199	404|PHI:404|PTH11|AAD30436|318829|Magnaporthe	26.25	160	97	1	46	184	203	362	7e-13	66.2
EFX06131	888|PHI:888|MGG_01707|EDK04578|318829|Magnaporthe	60.98	305	110	3	1	305	1	296	1e-131	378
EFX05528	2269|PHI:2269|Mdh1|0|13684|Phaeosphaeria	40.91	264	141	4	17	278	15	265	3e-59	190
EFX05920	2382|PHI:2382|Upa2|Q6QIY0|5270|Ustilago	54.49	312	129	2	11	322	8	306	2e-120	350
EFX06051	1294|PHI:1294|GzAPSES002|I1RMT5|5518|Gibberella	47.7	457	183	12	5	446	3	418	3e-117	351
EFX05327	97|PHI:97|TOXC|AAC62818|5017|Cochliobolus	55.35	2092	908	7	14	2098	4	2076	0	2415
EFX06093	96|PHI:96|FAS2|AAA34345|5476|Candida	63.19	1907	635	15	1	1862	1	1885	0	2443
EFX05955	3457	42.26	601	249	13	41	621	21	543	7e-140	425
EFX06153	355|PHI:355|GzmetE||5518|Fusarium	70.13	519	92	7	10	518	37	502	0	729
EFX05992	1174|PHI:1174|HDF3|I1RNQ2|5518|Gibberella	51.76	655	218	14	1	640	1	572	0	624
EFX05355	789|PHI:789|MGG_04116|EDJ99418|318829|Magnaporthe	73.2	291	74	3	969	1259	997	1283	6e-139	456
EFX05633	2255|PHI:2255|Abd1|Q0U2A0|13684|Phaeosphaeria	33.51	385	198	7	43	427	43	369	3e-63	209
EFX05729	911|PHI:911|um11451||5270|Ustilago	31.54	149	89	6	21	163	39	180	1e-13	69.3
EFX05898	2991|PHI:2991|MGG_01426.6|Q52G60|148305|Magnaporthe	68.15	785	222	9	1	775	1	767	0	1001
EFX06108	1022|PHI:1022|XLNR|ABN41464|5508|Fusarium	48.51	1037	350	25	1	985	1	905	0	808
EFX05612	208|PHI:208|CaNAG5|BAB43816|5476|Candida	23.03	456	253	20	51	475	65	453	2e-17	82.4
EFX05499	1685|PHI:1685|GzRad003|I1S5Z3|5518|Gibberella	24.93	345	225	11	35	357	241	573	2e-10	59.3
EFX05967	121|PHI:121|PTH3|AAB88888|318829|Magnaporthe	72.4	221	55	1	10	230	4	218	2e-110	325
EFX06130	2930|PHI:2930|ctf2|J9MFF7|59765|Fusarium	45.28	742	326	12	4	705	5	706	0	612
EFX05567	1393|PHI:1393|GzC2H056|I1RU69|5518|Gibberella	23.46	243	130	10	177	416	572	761	2e-10	60.8
EFX06119	1610|PHI:1610|GzP53L003|I1RSN1|5518|Gibberella	59.55	576	184	17	1	561	1	542	0	632
EFX05440	465|PHI:465|KIN2|AAB63337|5270|Ustilago	37.14	385	188	10	80	458	4	340	8e-61	218
EFX05455	3485	65.71	210	52	5	1	191	16	224	2e-80	239
EFX05849	3037	72.39	536	145	2	1	534	1	535	0	832
EFX05296	159|PHI:159|URA5|AAC62627|5037|Histoplasma	49.37	239	106	3	8	239	14	244	1e-76	233
EFX06091	2821|PHI:2821|SNF2|Q5ALP9|5476|Candida	30.08	133	87	3	93	223	1508	1636	1e-12	69.7
EFX06091	2821|PHI:2821|SNF2|Q5ALP9|5476|Candida	30.91	110	72	1	291	396	1511	1620	5e-12	67.4
EFX05546	1377|PHI:1377|GzC2H040|I1RQ34|5518|Gibberella	58.32	475	149	14	1	465	1	436	3e-135	415
EFX06095	1571|PHI:1571|GzOB011|I1RE76|5518|Gibberella	84.08	157	25	0	3	159	5	161	7e-98	281
EFX05607	2058|PHI:2058|LHS1|MGG_06648.5|148305|Magnaporthe	26.75	400	263	9	109	481	146	542	1e-34	139
EFX05839	2301|PHI:2301|CHS7|B5M4A8|148305|Magnaporthe	75.73	647	136	5	1	646	23	649	0	1024
EFX05839	2301|PHI:2301|CHS7|B5M4A8|148305|Magnaporthe	26.33	319	167	10	596	906	552	810	8e-21	95.5
EFX05421	2336|PHI:2336|NIA1|O00101|13684|Stagonospora	54.23	922	353	16	33	946	31	891	0	998
EFX05586	2455|PHI:2455|CRE1|J9MZK9|59765|Fusarium	55.02	498	133	10	1	485	1	420	3e-163	470
EFX06143	1662|PHI:1662|GzCCHC002|I1REJ1|5518|Gibberella	28.39	465	311	5	14	476	627	1071	4e-57	205
EFX05581	2104|PHI:2104|Vacuolar	30.66	486	258	12	43	475	146	605	1e-59	206
EFX05631	2976|PHI:2976|CgOPT1|C6ZRH8|29905|Colletotrichum	32.3	514	293	10	215	724	1	463	4e-70	248
EFX05631	2976|PHI:2976|CgOPT1|C6ZRH8|29905|Colletotrichum	39.08	284	168	1	763	1046	449	727	4e-66	236
EFX05831	1896|PHI:1896|GzZC211|I1RNR1|5518|Gibberella	39.62	679	312	15	31	707	97	679	5e-151	467
EFX06012	2205|PHI:2205|JmjC	25.16	159	92	4	187	341	397	532	6e-07	48.5
EFX06071	2514|PHI:2514|PFS2|Q4X1Y0|746128|Aspergillus	32.58	89	57	1	68	156	81	166	8e-08	52
EFX06071	2514|PHI:2514|PFS2|Q4X1Y0|746128|Aspergillus	27.17	173	111	6	22	193	125	283	1e-07	51.2
EFX05718	339|PHI:339|CLPT1|CAC41973|290576|Colletotrichum	40.24	164	93	2	8	171	10	168	3e-36	134
EFX05558	3460	30.35	514	260	20	96	537	187	674	1e-43	162
EFX06022	1565|PHI:1565|GzOB005|I1RBF6|5518|Gibberella	33.33	540	289	14	99	590	30	546	9e-78	258
EFX05297	503|PHI:503|COX15|AAB64668|4932|Saccharomyces	48.22	450	224	3	63	508	26	470	3e-127	381
EFX06037	2611|PHI:2611|CMLE|H9C592|59765|Fusarium	69.13	366	104	4	1	365	7	364	0	541
EFX05758	1356|PHI:1356|GzC2H016|I1RE06|5518|Gibberella	41.13	124	67	3	361	480	305	426	2e-24	104
EFX05893	3102	45.04	393	204	6	28	418	72	454	1e-114	345
EFX03420	538|PHI:538|FRT1|AAU87358|40559|Botrytis	29.73	74	52	0	136	209	347	420	2e-07	48.1
EFX03418	823|PHI:823|beta-tubulin|CAA56936|38038|Rhynchosporium	89.98	429	43	0	1	429	1	429	0	806
EFX03419	2315|PHI:2315|ChLae1|G4XKY9|5016|Cochliobolus	33.22	295	181	10	43	328	3	290	3e-49	167
EFX04965	386|PHI:386|TSA1|AAP68994|5207|Cryptococcus	61.05	190	70	3	6	194	9	195	9e-79	236
EFX05010	3123	50	54	27	0	1	54	1	54	5e-14	58.9
EFX04960	1210|PHI:1210|FGSG_01058|I1S077|5518|Gibberella	28.32	339	192	8	125	461	989	1278	3e-35	139
EFX04956	1838|PHI:1838|GzZC153|I1RGC8|5518|Gibberella	28.46	636	349	14	512	1127	15	564	1e-65	233
EFX04904	511|PHI:511|CaNAG4|EAK93098|5476|Candida	27.12	413	261	10	123	523	183	567	6e-24	103
EFX04986	1925|PHI:1925|GzZC240|I1RH59|5518|Gibberella	24.77	432	282	13	208	628	235	634	8e-31	125
EFX04986	1925|PHI:1925|GzZC240|I1RH59|5518|Gibberella	52.73	55	25	1	4	57	10	64	2e-13	70.5
EFX04994	2837|PHI:2837|OXI1|D2SZX7|5016|Cochliobolus	40.44	136	79	2	24	158	39	173	2e-21	91.3
EFX05087	881|PHI:881|MGG_04556|EDJ96020|318829|Magnaporthe	26.65	334	225	7	7	328	11	336	2e-31	119
EFX05028	1555|PHI:1555|GzMyb019|I1RDG6|5518|Gibberella	23.67	469	324	11	57	505	72	526	4e-24	103
EFX05057	812|PHI:812|MGG_10702|EDJ94108|318829|Magnaporthe	45.36	366	185	6	15	368	9	371	6e-98	300
EFX04953	2090|PHI:2090|Moatg29|MGG_02790|148305|Magnaporthe	30.77	494	241	18	62	538	5	414	6e-37	140
EFX05058	441|PHI:441|BTP1|CAE55153|40559|Botrytis	26.58	222	150	7	82	295	101	317	7e-09	54.3
EFX05003	222|PHI:222|PELB|AAD09857|5457|Colletotrichum	65.68	303	98	4	33	333	33	331	2e-119	349
EFX04979	404|PHI:404|PTH11|AAD30436|318829|Magnaporthe	25.22	337	241	5	58	388	40	371	2e-29	119
EFX05054	216|PHI:216|HDC1|AAK35180|5017|Cochliobolus	32.57	175	111	4	192	365	156	324	2e-21	93.6
EFX04931	504|PHI:504|LEU2|CAA42366|4932|Saccharomyces	30.67	375	228	12	4	360	1	361	5e-39	142
EFX04867	2570|PHI:2570|CYB2|Q6FM61|5478|Candida	32.42	364	214	9	38	371	192	553	1e-55	192
EFX04885	538|PHI:538|FRT1|AAU87358|40559|Botrytis	29.61	483	312	11	40	515	100	561	2e-47	173
EFX04865	1992|PHI:1992|GzZC307|I1R983|5518|Gibberella	25.83	240	165	6	171	409	421	648	8e-12	65.1
EFX05103	438|PHI:438|BcBOT1	28.7	446	290	14	66	507	78	499	6e-39	146
EFX04863	1890|PHI:1890|GzZC205|I1RTH7|5518|Gibberella	37.05	610	273	20	1	555	1	554	5e-91	308
EFX04863	1890|PHI:1890|GzZC205|I1RTH7|5518|Gibberella	38.17	317	130	6	646	944	573	841	6e-59	214
EFX04951	2401|PHI:2401|CaRING1|G0T3B3|456327|Xanthomonas	44	50	26	2	530	578	105	153	1e-07	49.7
EFX05114	1496|PHI:1496|MAT1-2-1|I1RX44|5518|Gibberella	59.15	71	29	0	152	222	123	193	1e-23	95.1
EFX04995	1662|PHI:1662|GzCCHC002|I1REJ1|5518|Gibberella	56.76	518	179	8	29	542	633	1109	1e-175	556
EFX04895	1741|PHI:1741|GzZC056|I1S780|5518|Gibberella	40.7	661	310	14	66	690	81	695	5e-146	454
EFX04852	2968|PHI:2968|Hxs1|J9VQA5|5207|Cryptococcus	25	496	331	10	76	564	58	519	3e-34	133
EFX05074	3364	32.81	128	78	5	24	149	57	178	7e-07	47
EFX04839	404|PHI:404|PTH11|AAD30436|318829|Magnaporthe	25.27	376	250	10	11	371	103	462	2e-29	117
EFX05109	1998|PHI:1998|GzZC313|I1R9B9|5518|Gibberella	28.66	307	187	11	13	313	45	325	8e-28	109
EFX04971	2240|PHI:2240|Srt1|Q4PBY9|5270|Ustilago	29.91	458	310	7	57	507	46	499	2e-50	180
EFX05115	748|PHI:748|um00446|Not	31.57	415	225	13	8	374	103	506	3e-47	178
EFX05115	748|PHI:748|um00446|Not	28.76	306	180	9	550	825	519	816	5e-23	102
EFX05030	2968|PHI:2968|Hxs1|J9VQA5|5207|Cryptococcus	24.95	473	326	12	9	465	4	463	1e-28	115
EFX04917	199|PHI:199|AOX1|AAF82788|5499|Cladosporium	23.56	331	202	14	25	329	8	313	2e-10	60.5
EFX04849	893|PHI:893|MGG_02986|EDK01543|318829|Magnaporthe	38.37	1144	532	32	407	1449	554	1625	0	681
EFX04849	893|PHI:893|MGG_02986|EDK01543|318829|Magnaporthe	33.33	411	185	13	1	359	3	376	7e-50	193
EFX04980	881|PHI:881|MGG_04556|EDJ96020|318829|Magnaporthe	29.48	363	228	10	7	367	2	338	1e-37	137
EFX04947	267|PHI:267|MLT1|AAD51594|5476|Candida	24.58	602	376	16	202	755	316	887	1e-33	138
EFX04947	267|PHI:267|MLT1|AAD51594|5476|Candida	22.88	612	360	17	803	1332	1019	1600	2e-33	137
EFX04901	2517|PHI:2517|TRPS|Q4X0J6|746128|Aspergillus	67.47	375	121	1	49	423	339	712	0	528
EFX04900	2315|PHI:2315|ChLae1|G4XKY9|5016|Cochliobolus	32.89	149	94	4	92	237	69	214	6e-23	92.8
EFX05112	817|PHI:817|MGG_12252|EDK03444|318829|Magnaporthe	26.35	148	101	3	535	677	122	266	4e-13	67.8
EFX04861	3225	42.82	418	224	9	1	411	4	413	2e-127	375
EFX04879	1555|PHI:1555|GzMyb019|I1RDG6|5518|Gibberella	25.05	479	330	12	26	482	74	545	8e-34	134
EFX05019	2269|PHI:2269|Mdh1|0|13684|Phaeosphaeria	35.15	239	145	7	4	236	15	249	7e-32	117
EFX04996	413|PHI:413|MPD1|AAT84078|13684|Stagonospora	26.07	399	252	14	19	392	11	391	5e-29	115
EFX05043	3457	27.32	183	118	8	108	279	85	263	6e-07	49.3
EFX04898	2654|PHI:2654|DUR1,2|Q59VF3|5476|Candida	23.64	385	224	11	103	454	69	416	9e-13	68.6
EFX04911	256|PHI:256|GAS1|AAK52794|318829|Magnaporthe	29.58	240	140	11	5	220	4	238	2e-14	69.3
EFX05088	413|PHI:413|MPD1|AAT84078|13684|Stagonospora	25.51	396	245	8	3	369	11	385	1e-30	119
EFX04880	225|PHI:225|PEP5|AAK16922|140110|Nectria	41.56	243	132	4	246	481	2	241	8e-48	166
EFX04954	441|PHI:441|BTP1|CAE55153|40559|Botrytis	30.23	215	139	5	4	207	26	240	5e-17	78.2
EFX05116	1413|PHI:1413|GzC2H080|I1RZD4|5518|Gibberella	22.89	603	362	17	500	1063	449	987	2e-38	152
EFX05116	1413|PHI:1413|GzC2H080|I1RZD4|5518|Gibberella	47.37	76	30	2	18	83	67	142	8e-13	70.1
EFX04846	1701|PHI:1701|GzZC016|I1RKS9|5518|Gibberella	26.79	265	174	6	196	454	124	374	2e-21	95.1
EFX05067	1555|PHI:1555|GzMyb019|I1RDG6|5518|Gibberella	25	184	131	2	46	223	114	296	7e-15	73.9
EFX05084	812|PHI:812|MGG_10702|EDJ94108|318829|Magnaporthe	25.81	372	246	7	3	371	27	371	8e-30	116
EFX05083	1047|PHI:1047|CTB6|ABK64183|29003|Cercospora	27.37	358	215	11	1	328	1	343	6e-25	100
EFX05033	2968|PHI:2968|Hxs1|J9VQA5|5207|Cryptococcus	25.33	458	305	10	35	472	23	463	2e-26	109
EFX04933	1456|PHI:1456|GzAra004|I1RN15|5518|Gibberella	26.74	430	264	12	27	412	315	737	7e-40	150
EFX04942	1972|PHI:1972|GzZC287|I1RF57|5518|Gibberella	26.02	123	86	2	182	303	185	303	5e-07	49.7
EFX04920	1046|PHI:1046|CTB5|ABK64182|29003|Cercospora	28.45	464	271	14	38	448	3	458	2e-40	149
EFX05021	1393|PHI:1393|GzC2H056|I1RU69|5518|Gibberella	40.72	690	336	11	49	729	50	675	3e-169	508
EFX05091	2976|PHI:2976|CgOPT1|C6ZRH8|29905|Colletotrichum	35.23	738	418	9	6	704	11	727	8e-158	478
EFX04886	1133|PHI:1133|Lmepi|B9DR51|5022|Leptosphaeria	36.68	398	176	7	55	429	6	350	2e-68	223
EFX04970	501|PHI:501|ADE2|CAA99327|4932|Saccharomyces	45.85	578	270	11	23	572	6	568	5e-159	468
EFX05040	513|PHI:513|ARN1	24.78	581	415	6	30	602	15	581	2e-42	158
EFX05079	3014	42.55	2021	829	79	42	1853	36	1933	0	1192
EFX04983	2086|PHI:2086|Moatg24|MGG_03638|148305|Magnaporthe	29.69	128	83	3	148	269	57	183	4e-10	57
EFX04902	1666|PHI:1666|GzCCHC006|I1RX47|5518|Gibberella	49.89	439	157	8	22	456	15	394	2e-140	414
EFX04875	2825|PHI:2825|SET1|Q5ABG1|5476|Candida	38.35	133	74	6	629	756	911	1040	7e-19	90.1
EFX04955	1215|PHI:1215|FGSG_02838|I1RX56|5518|Gibberella	51.79	502	174	15	364	850	1	449	2e-157	479
EFX04955	1215|PHI:1215|FGSG_02838|I1RX56|5518|Gibberella	42.28	123	57	4	911	1031	445	555	3e-24	105
EFX05014	451|PHI:451|PMT1|AAC31119|5476|Candida	42.88	786	395	15	47	825	65	803	0	615
EFX05093	1677|PHI:1677|GzDHHC005|Q4I1J3|5518|Gibberella	32.68	456	222	10	20	462	109	492	2e-75	246
EFX04918	1771|PHI:1771|GzZC086|I1RX74|5518|Gibberella	34.58	347	138	10	175	516	186	448	4e-36	137
EFX05090	1407|PHI:1407|GzC2H071|I1RX64|5518|Gibberella	48.69	421	170	8	50	465	22	401	3e-124	392
EFX05090	1407|PHI:1407|GzC2H071|I1RX64|5518|Gibberella	28.48	302	141	10	569	867	408	637	2e-16	81.3
EFX04993	1956|PHI:1956|GzZC271|I1RLT2|5518|Gibberella	22.96	405	234	15	284	659	200	555	2e-15	77.8
EFX04858	2329|PHI:2329|CTB4|A0ST42|29003|Cercospora	25.22	460	322	11	45	494	58	505	4e-20	93.2
EFX04907	191|PHI:191|TOM1|AAB08446|39703|Septoria	31.09	698	364	25	106	693	105	795	1e-70	247
EFX04833	2260|PHI:2260|PKS1|G8DNT0|45130|Cochliobolus	24.43	1723	1087	61	150	1761	97	1715	2e-106	379
EFX05104	413|PHI:413|MPD1|AAT84078|13684|Stagonospora	28.64	440	280	11	5	426	2	425	1e-45	163
EFX04872	141|PHI:141|CFP|AAC78076|84275|Cercospora	23.18	384	273	14	36	408	104	476	3e-08	53.1
EFX04987	1764|PHI:1764|GzZC079|Q4I0C5|5518|Gibberella	25.62	445	310	12	269	707	68	497	2e-37	144
EFX05061	55|PHI:55|PKS1|AAB08104|5016|Cochliobolus	32.89	2651	1508	68	11	2533	13	2520	0	1182
EFX05060	1921|PHI:1921|GzZC236|I1RCH8|5518|Gibberella	28.8	316	191	8	16	322	241	531	1e-26	109
EFX05118	2315|PHI:2315|ChLae1|G4XKY9|5016|Cochliobolus	34.47	293	180	7	54	339	3	290	9e-52	174
EFX04982	2315|PHI:2315|ChLae1|G4XKY9|5016|Cochliobolus	34.95	289	181	5	62	343	2	290	8e-52	174
EFX05000	2269|PHI:2269|Mdh1|0|13684|Phaeosphaeria	27.84	273	173	7	1	266	11	266	8e-22	89.7
EFX04939	174|PHI:174|GNA1|BAA36496|5476|Candida	50	146	72	1	18	163	2	146	7e-45	145
EFX04969	2256|PHI:2256|Xdh1|Q0UA24|13684|Phaeosphaeria	45.57	79	34	2	1118	1195	30	100	3e-11	63.9
EFX05038	2255|PHI:2255|Abd1|Q0U2A0|13684|Phaeosphaeria	29.45	275	147	10	1	275	131	358	2e-29	113
EFX04838	1164|PHI:1164|RRG1|I1RX94|5518|Gibberella	75.77	194	40	3	416	603	559	751	2e-93	308
EFX04838	1164|PHI:1164|RRG1|I1RX94|5518|Gibberella	58.25	103	40	2	7	109	283	382	2e-31	129
EFX04905	1360|PHI:1360|GzC2H020|I1RGE3|5518|Gibberella	31.48	216	106	6	231	406	225	438	7e-26	109
EFX04860	1941|PHI:1941|GzZC256|I1RGD9|5518|Gibberella	57.19	827	234	14	58	870	57	777	0	870
EFX05117	1193|PHI:1193|(Sc	79.26	516	95	5	160	674	6	510	0	820
EFX04837	1359|PHI:1359|GzC2H019|I1RGC9|5518|Gibberella	57.98	188	63	4	1	186	1	174	4e-40	134
EFX02553	2594|PHI:2594|SET3|Q59ZX1|746128|Aspergillus	30.28	142	66	5	51	166	365	499	2e-07	52
EFX02535	1372|PHI:1372|GzC2H035|I1RN03|5518|Gibberella	34.91	275	116	10	64	323	116	342	1e-18	82.8
EFX02519	211|PHI:211|CaTUP1|AAB63195|5476|Candida	30.94	278	141	9	316	574	264	509	8e-24	103
EFX02519	211|PHI:211|CaTUP1|AAB63195|5476|Candida	31.87	160	96	5	470	616	260	419	2e-16	79.7
EFX02519	211|PHI:211|CaTUP1|AAB63195|5476|Candida	27.11	166	102	5	477	624	214	378	1e-10	62
EFX02549	1935|PHI:1935|GzZC250|I1RFP7|5518|Gibberella	22.3	574	384	15	5	555	40	574	4e-22	99.4
EFX02524	2240|PHI:2240|Srt1|Q4PBY9|5270|Ustilago	27.38	493	324	9	46	519	26	503	1e-49	178
EFX02538	2393|PHI:2393|Related	25.26	293	180	10	35	323	24	281	3e-13	68.9
EFX02526	2526|PHI:2526|LUC7|Q4WMR3|746128|Aspergillus	68.4	250	71	2	1	244	1	248	5e-121	349
EFX02523	2197|PHI:2197|MoRgs6|XP_364773|148305|Magnaporthe	48.86	481	162	7	1	401	1	477	3e-149	433
EFX02565	2038|PHI:2038|Mir1|MGG_02370|148305|Magnaporthe	48.73	314	153	4	1	311	1	309	1e-81	251
EFX02458	3060	63.54	1226	378	21	3	1207	4	1181	0	1468
EFX02496	4559	38.16	684	383	10	1	658	160	829	7e-136	425
EFX02468	339|PHI:339|CLPT1|CAC41973|290576|Colletotrichum	28.57	84	55	3	18	96	11	94	3e-07	46.2
EFX02469	1347|PHI:1347|GzC2H007|I1RBT2|5518|Gibberella	34.78	207	75	6	458	613	426	623	1e-23	102
EFX02556	1458|PHI:1458|GzAra006|Q4I7F9|5518|Gibberella	35.94	473	263	10	502	943	254	717	1e-82	284
EFX02514	1476|PHI:1476|GzHMG008|I1RC98|5518|Gibberella	28.27	191	122	6	132	314	122	305	1e-14	71.2
EFX02520	1133|PHI:1133|Lmepi|B9DR51|5022|Leptosphaeria	26.92	286	146	12	7	245	3	272	2e-14	71.6
EFX02504	464|PHI:464|KIN1|AAB63336|5270|Ustilago	35.12	598	273	18	168	697	187	737	2e-84	296
EFX02484	2908|PHI:2908|CYP51B|I1RBR4|5518|Fusarium	72.49	527	124	4	1	507	1	526	0	771
EFX02539	2960|PHI:2960|frdA|C5BDL7|67780|Edwardsiella	40.72	582	290	13	1064	1624	34	581	1e-121	395
EFX02474	335|PHI:335|CGRA|AAG28884|5085|Aspergillus	58.97	117	45	1	1	117	1	114	4e-40	130
EFX02462	2834|PHI:2834|LAM1|C3PTB1|5016|Cochliobolus	43.3	224	122	2	1073	1295	6	225	2e-49	182
EFX02540	2171|PHI:2171|Peroxisomal	48.31	681	325	11	7	677	32	695	0	630
EFX02452	1393|PHI:1393|GzC2H056|I1RU69|5518|Gibberella	31.61	813	426	22	771	1573	87	779	1e-108	363
EFX02461	1924|PHI:1924|GzZC239|I1RH93|5518|Gibberella	29.02	696	367	20	12	683	99	691	2e-76	263
EFX02490	1227|PHI:1227|FGSG_07742|I1RPV7|5518|Gibberella	59.99	4019	1443	33	3	3996	2	3880	0	4999
EFX02515	1930|PHI:1930|GzZC245|I1RER7|5518|Gibberella	39.66	58	35	0	40	97	21	78	6e-11	62
EFX02487	2356|PHI:2356|MoHYR1|G4N178|148305|Magnaporthe	71.01	169	49	0	2	170	3	171	1e-89	261
EFX02510	544|PHI:544|BCMFS1|AAF64435|332648|Botrytis	25.28	538	347	14	12	531	28	528	8e-39	148
EFX02516	1552|PHI:1552|GzMyb016|I1S0N5|5518|Gibberella	36.4	511	300	8	908	1408	169	664	4e-93	327
EFX02513	1816|PHI:1816|GzZC131|I1RRS3|5518|Gibberella	62.34	993	257	16	14	1000	9	890	0	1136
EFX02533	1566|PHI:1566|GzOB006|I1RC95|5518|Gibberella	38.4	250	149	3	460	708	131	376	2e-50	181
EFX02501	2134|PHI:2134|MoHox5|MGG_07437|148305|Magnaporthe	60	190	51	4	254	426	213	394	1e-61	218
EFX02499	748|PHI:748|um00446|Not	29.65	452	252	12	32	439	100	529	3e-39	153
EFX02499	748|PHI:748|um00446|Not	28.62	290	175	6	525	790	537	818	4e-26	112
EFX02511	2835|PHI:2835|RED2|C3JXE8|5016|Cochliobolus	22.99	187	126	3	49	229	72	246	2e-08	51.6
EFX02525	2968|PHI:2968|Hxs1|J9VQA5|5207|Cryptococcus	21.49	335	231	9	87	410	150	463	2e-14	72.4
EFX02567	1405|PHI:1405|GzC2H069|I1RWW2|5518|Gibberella	24.8	379	246	14	4	363	330	688	9e-20	89
EFX01948	2960|PHI:2960|frdA|C5BDL7|67780|Edwardsiella	45.83	72	27	2	405	475	351	411	2e-10	60.1
EFX01963	2395|PHI:2395|GzSYN1|I1RBM2|5518|Gibberella	68.69	297	74	4	4	283	3	297	1e-139	403
EFX01848	2305|PHI:2305|BcFKBP12||40559|Botrytis	38.38	99	35	4	40	113	19	116	2e-12	58.5
EFX01912	2518|PHI:2518|MET16|Q4WWN9|746128|Aspergillus	59.11	291	108	5	23	312	7	287	8e-119	347
EFX01847	1338|PHI:1338|GzbZIP020|I1S8Y4|5518|Gibberella	62.55	251	67	6	119	356	71	307	5e-92	279
EFX01951	1896|PHI:1896|GzZC211|I1RNR1|5518|Gibberella	22.5	400	244	13	191	541	284	666	1e-14	75.5
EFX01959	2393|PHI:2393|Related	27.63	456	289	11	69	514	11	435	7e-45	163
EFX01939	2602|PHI:2602|Rim9|Q4PH32|5270|Ustilago	25.92	355	207	14	1	312	1	342	5e-15	76.3
EFX01958	1591|PHI:1591|GzOB031|I1RWQ7|5518|Gibberella	54.58	262	104	5	218	472	261	514	2e-86	275
EFX01958	1591|PHI:1591|GzOB031|I1RWQ7|5518|Gibberella	38.06	155	55	6	116	231	45	197	5e-14	71.2
EFX01973	1182|PHI:1182|(Sc	38.4	2125	1143	36	26	2083	464	2489	0	1347
EFX01910	1402|PHI:1402|GzC2H065|I1RWB8|5518|Gibberella	41.12	197	105	4	232	428	608	793	1e-34	135
EFX02017	17|PHI:17|ACP|CAA43678|5482|Candida	33.83	405	213	10	23	427	40	389	1e-48	172
EFX01921	1161|PHI:1161|MgMfs1|A4ZGP3|54734|Mycosphaerella	26.05	334	229	6	131	457	181	503	2e-22	99
EFX01892	3387	28.61	1828	1171	40	404	2184	647	2387	0	649
EFX01892	3387	42.21	443	190	5	13	393	57	495	4e-94	338
EFX01974	3162	32.26	747	357	17	514	1168	672	1361	7e-96	334
EFX01991	197|PHI:197|ALO1|AAC98913|5476|Candida	31.69	609	276	16	18	554	3	543	1e-95	305
EFX01967	2106|PHI:2106|1-phosphatidylinositol-4,5-bisphosphate	34.57	564	266	16	389	946	237	703	9e-84	285
EFX01967	2106|PHI:2106|1-phosphatidylinositol-4,5-bisphosphate	45.63	103	49	3	170	268	50	149	2e-17	84.3
EFX01932	1627|PHI:1627|GzTF2S002|I1RW90|5518|Gibberella	75.68	111	26	1	8	118	1	110	2e-57	174
EFX02020	1648|PHI:1648|GzWing020|I1RWP1|5518|Gibberella	66.39	2490	677	28	9	2493	8	2342	0	3194
EFX01875	2594|PHI:2594|SET3|Q59ZX1|746128|Aspergillus	46.67	45	20	1	154	194	372	416	1e-08	55.5
EFX01896	2269|PHI:2269|Mdh1|0|13684|Phaeosphaeria	32.37	278	158	8	14	288	15	265	7e-35	126
EFX01968	2256|PHI:2256|Xdh1|Q0UA24|13684|Phaeosphaeria	29.41	357	231	10	483	832	16	358	5e-36	139
EFX01858	2027|PHI:2027|TGL1-1|G4NJL1|148305|Magnaporthe	63.76	607	187	7	9	593	12	607	0	776
EFX01862	1530|PHI:1530|Gzsnd|I1RWP4|5518|Gibberella	67.04	889	288	3	1	888	1	885	0	1251
EFX01947	769|PHI:769|CPSOD1|CAC50073|5111|Claviceps	81.17	154	29	0	1	154	1	154	2e-89	259
EFX01990	675|PHI:675|ROM2|AAW45289|192011|Cryptococcus	25.89	838	496	25	847	1658	411	1149	9e-68	249
EFX01966	1660|PHI:1660|GzCCCH004|I1S4C9|5518|Gibberella	24.69	397	198	18	1487	1816	701	1063	1e-10	64.3
EFX02005	2337|PHI:2337|SUR7|Q5A4M8|5476|Candida	32.95	258	136	8	451	682	11	257	6e-26	106
EFX02018	1913|PHI:1913|GzZC228|I1RP37|5518|Gibberella	24.35	386	187	14	96	459	104	406	2e-11	63.5
EFX01919	552|PHI:552|BcLCC2|AAK77953|40559|Botrytis	35.65	575	313	16	16	562	36	581	5e-94	300
EFX01860	2644|PHI:2644|thioredoxin	37.36	91	55	1	3	93	6	94	1e-18	82
EFX01886	1371|PHI:1371|GzC2H034|I1RM60|5518|Gibberella	45.98	87	45	1	12	96	183	269	4e-23	88.6
EFX01970	3238	52.04	196	49	4	17	174	39	227	6e-55	185
EFX01866	2597|PHI:2597|Pir32|Q59PW0	37.34	233	133	5	106	336	38	259	2e-36	139
EFX01978	1399|PHI:1399|GzC2H062|I1RV74|5518|Gibberella	29.32	133	69	4	308	427	350	470	2e-08	54.3
EFX02012	419|PHI:419|CSH1|AAP93915|5476|Candida	28.22	202	126	4	42	226	29	228	1e-12	65.5
EFX01942	2084|PHI:2084|Moatg18|MGG_03139|148305|Magnaporthe	28.91	256	145	6	19	240	10	262	2e-29	115
EFX01971	2244|PHI:2244|37865|gi|46099354|5270|Ustilago	72.42	359	96	2	7	365	1	356	0	545
EFX02006	184|PHI:184|RBT4|AAG09789|5476|Candida	30.49	164	80	7	186	341	219	356	7e-12	63.2
EFX01922	2961|PHI:2961|gcvP|C5BAT0|67780|Edwardsiella	51.7	1002	421	13	74	1067	12	958	0	931
EFX01946	2160|PHI:2160|MoSHO1|MGG_09125|148305|Magnaporthe	78.03	305	60	5	1	299	15	318	2e-166	467
EFX02010	2835|PHI:2835|RED2|C3JXE8|5016|Cochliobolus	39.09	243	139	6	1	240	29	265	3e-46	157
EFX01900	566|PHI:566|cel2|AAK19621|5017|Cochliobolus	40.67	450	218	17	6	447	6	414	6e-91	283
EFX01899	2921|PHI:2921|FET3-2|E3Q7G1|31870|Colletotrichum	66.28	513	168	3	39	547	64	575	0	691
EFX02003	3234	81.06	396	72	1	21	416	46	438	0	679
EFX01950	261|PHI:261|ICL1|AAM89498|5022|Leptosphaeria	44.4	536	294	3	73	608	6	537	4e-169	494
EFX01861	2022|PHI:2022|BUF1|MGG_02252|148305|Magnaporthe	78.2	289	56	2	141	428	1	283	1e-162	461
EFX01928	447|PHI:447|MCSA|CAI61947|5085|Aspergillus	71.49	442	124	2	34	475	26	465	0	665
EFX01949	784|PHI:784|MGG_00056|EDK03390|318829|Magnaporthe	35.82	268	159	8	4	262	10	273	4e-33	122
EFX01895	24|PHI:24|Avenacinase	37.81	886	399	22	97	953	26	788	6e-156	481
EFX01937	2802|PHI:2802|3hnr|B2ZRQ4|93612|Setosphaeria	22.65	287	176	10	10	279	6	263	3e-10	57
EFX01969	697|PHI:697|ugt51E1|AAM81358|5022|Leptosphaeria	31.79	324	195	17	94	405	76	385	1e-25	104
EFX01851	2927|PHI:2927|lip5|J9N2Z8|59765|Fusarium	30.28	459	276	16	52	479	48	493	1e-50	181
EFX01952	1424|PHI:1424|GzC2H092|I1S3J7|5518|Gibberella	24.19	434	263	18	74	486	48	436	1e-16	82.8
EFX04091	1304|PHI:1304|GzbHLH005|I1RCJ0|5518|Gibberella	52.38	546	218	19	1	530	1	520	1e-152	448
EFX04673	280|PHI:280|CCN1|AAG36938|5207|Cryptococcus	53.22	684	285	8	1	664	1	669	0	699
EFX04113	1454|PHI:1454|GzAra002|I1RCI0|5518|Gibberella	69.84	189	57	0	38	226	85	273	3e-84	265
EFX04113	1454|PHI:1454|GzAra002|I1RCI0|5518|Gibberella	42.86	84	42	1	166	243	341	424	9e-13	64.7
EFX03692	1454|PHI:1454|GzAra002|I1RCI0|5518|Gibberella	47.2	125	56	2	7	131	550	664	6e-31	115
EFX03960	211|PHI:211|CaTUP1|AAB63195|5476|Candida	24.46	278	176	7	42	309	249	502	2e-13	68.6
EFX04748	1921|PHI:1921|GzZC236|I1RCH8|5518|Gibberella	52.79	951	299	25	14	896	21	889	0	908
EFX04460	1763|PHI:1763|GzZC078|I1RXE8|5518|Gibberella	43.2	706	344	13	22	699	9	685	0	566
EFX03887	1408|PHI:1408|GzC2H072|I1RXE9|5518|Gibberella	40.04	492	180	10	8	497	6	384	4e-103	317
EFX03767	267|PHI:267|MLT1|AAD51594|5476|Candida	37.19	570	337	6	1160	1722	1048	1603	2e-108	379
EFX03767	267|PHI:267|MLT1|AAD51594|5476|Candida	26.63	646	398	19	528	1117	451	1076	4e-53	203
EFX03767	267|PHI:267|MLT1|AAD51594|5476|Candida	25.55	497	312	21	501	965	1118	1588	2e-17	86.3
EFX03445	1245|PHI:1245|FGSG_01559|I1RTL1|5518|Gibberella	51.74	777	313	15	291	1052	1	730	0	706
EFX03706	576|PHI:576|NoxA|BAE72680|35717|Epichloe	82.61	552	94	1	4	555	8	557	0	989
EFX04431	1648|PHI:1648|GzWing020|I1RWP1|5518|Gibberella	35.58	728	399	17	15	708	173	864	7e-118	405
EFX04409	1673|PHI:1673|GzDHHC001|Q4IMZ7|5518|Gibberella	44.36	505	171	8	10	487	7	428	9e-138	406
EFX04237	231|PHI:231|RPK1|AAK31209|5462|Colletotrichum	31.43	105	72	0	68	172	257	361	1e-07	53.1
EFX03868	1263|PHI:1263|FGSG_04770|I1RB84|5518|Gibberella	48.64	660	265	16	1	630	1	616	0	565
EFX03838	17|PHI:17|ACP|CAA43678|5482|Candida	28.13	391	216	15	50	402	13	376	5e-26	105
EFX03495	1957|PHI:1957|GzZC272|I1RLS0|5518|Gibberella	45.34	708	341	10	37	739	9	675	0	619
EFX04813	2107|PHI:2107|Zinc-regulated	42.79	437	198	11	36	453	196	599	3e-95	300
EFX04036	1707|PHI:1707|GzZC022|I1RJY6|5518|Gibberella	28.03	767	460	20	4	756	42	730	5e-68	240
EFX04542	465|PHI:465|KIN2|AAB63337|5270|Ustilago	42.28	324	175	6	68	387	25	340	1e-61	226
EFX04634	1369|PHI:1369|GzC2H031|I1RLS1|5518|Gibberella	52.96	321	108	8	1	299	1	300	3e-97	290
EFX03707	2020|PHI:2020|Tup1|XP_759427|5270|Ustilago	25.18	282	169	6	97	359	466	724	5e-23	102
EFX03707	2020|PHI:2020|Tup1|XP_759427|5270|Ustilago	30.57	193	109	6	181	369	463	634	8e-16	79
EFX03707	2020|PHI:2020|Tup1|XP_759427|5270|Ustilago	25.16	306	154	12	93	360	415	683	4e-15	76.6
EFX03707	2020|PHI:2020|Tup1|XP_759427|5270|Ustilago	26.74	258	132	9	87	318	498	724	6e-15	76.3
EFX03707	2020|PHI:2020|Tup1|XP_759427|5270|Ustilago	26.06	165	104	4	109	258	570	731	5e-08	53.9
EFX04336	2183|PHI:2183|CPXB|EHA48040.1|148305|Magnaporthe	64.41	739	251	7	4	739	53	782	0	929
EFX04723	1260|PHI:1260|FGSG_13944|I1RUC7|5518|Gibberella	36.73	196	118	6	880	1075	451	640	5e-15	77
EFX04723	1260|PHI:1260|FGSG_13944|I1RUC7|5518|Gibberella	36.22	185	113	5	857	1041	461	640	1e-14	75.5
EFX04723	1260|PHI:1260|FGSG_13944|I1RUC7|5518|Gibberella	37.86	140	83	4	948	1087	451	586	7e-11	63.5
EFX04723	1260|PHI:1260|FGSG_13944|I1RUC7|5518|Gibberella	33.13	166	103	6	809	973	482	640	6e-07	50.8
EFX04697	2315|PHI:2315|ChLae1|G4XKY9|5016|Cochliobolus	30.38	237	160	4	23	256	56	290	9e-36	129
EFX04586	24|PHI:24|Avenacinase	53.54	777	338	10	47	811	26	791	0	812
EFX03443	2247|PHI:2247|Sch1|EAT82552|13684|Phaeosphaeria	32.64	288	185	7	9	295	16	295	3e-31	118
EFX03978	812|PHI:812|MGG_10702|EDJ94108|318829|Magnaporthe	28.71	209	144	4	143	347	165	372	2e-13	69.3
EFX04635	1249|PHI:1249|FGSG_00132|I1RB79|5518|Gibberella	66.33	600	157	10	1	580	1	575	0	735
EFX03860	216|PHI:216|HDC1|AAK35180|5017|Cochliobolus	71.34	464	124	5	18	473	20	482	0	697
EFX04227	2968|PHI:2968|Hxs1|J9VQA5|5207|Cryptococcus	26.65	469	316	14	56	510	18	472	8e-35	134
EFX04577	881|PHI:881|MGG_04556|EDJ96020|318829|Magnaporthe	46.76	340	178	1	3	342	2	338	2e-104	311
EFX03608	2644|PHI:2644|thioredoxin	26.44	87	62	1	29	115	2	86	2e-07	47.4
EFX03479	2357|PHI:2357|CYP52X1|E2EAF6|475271|Beauveria	33.68	190	100	6	203	379	319	495	1e-18	85.1
EFX03857	510|PHI:510|CaNAG3|EAK93097|5476|Candida	24.02	433	295	7	225	653	142	544	1e-25	108
EFX04226	438|PHI:438|BcBOT1	26.32	456	285	14	37	474	43	465	2e-33	130
EFX04070	1761|PHI:1761|GzZC076|I1RXN7|5518|Gibberella	42.63	760	351	15	16	762	10	697	0	544
EFX03836	881|PHI:881|MGG_04556|EDJ96020|318829|Magnaporthe	29.22	332	217	7	27	355	20	336	8e-35	129
EFX04644	1756|PHI:1756|GzZC071|I1S4Q3|5518|Gibberella	47.62	189	76	6	455	640	12	180	7e-38	151
EFX04644	1756|PHI:1756|GzZC071|I1S4Q3|5518|Gibberella	44.79	96	53	0	777	872	183	278	8e-20	93.2
EFX04714	2378|PHI:2378|DEP4|D2E9W9|29001|Alternaria	25	128	90	3	4	125	2	129	1e-07	51.2
EFX04447	127|PHI:127|SAP6|CAA82924|5476|Candida	31.44	353	188	14	77	412	90	405	6e-29	115
EFX04581	3098	43.94	371	172	7	6	362	2	350	7e-91	278
EFX04040	1630|PHI:1630|GzWing002|I1RB71|5518|Gibberella	44.58	424	176	9	13	432	15	383	4e-117	350
EFX04101	277|PHI:277|BCP1|AAQ16572|40559|Botrytis	76	175	41	1	5	179	48	221	3e-95	277
EFX03793	1662|PHI:1662|GzCCHC002|I1REJ1|5518|Gibberella	42.15	567	295	5	32	593	18	556	2e-133	428
EFX03602	1006|PHI:1006|HMR1|Not	66.47	1199	311	18	5	1194	2	1118	0	1585
EFX03691	512|PHI:512|CaNAG6|BAB43823|5476|Candida	38.04	807	419	15	20	815	28	764	1e-171	518
EFX04309	2521|PHI:2521|GUS1|Q4WEM7|746128|Aspergillus	36.63	374	224	7	93	463	206	569	3e-63	222
EFX04471	3370	47.58	868	400	11	3	867	2	817	0	805
EFX04658	1484|PHI:1484|GzHMG016|I1RMG1|5518|Gibberella	31.83	333	169	10	586	912	379	659	1e-42	163
EFX04658	1484|PHI:1484|GzHMG016|I1RMG1|5518|Gibberella	50.34	149	54	2	21	166	67	198	8e-40	154
EFX04404	1954|PHI:1954|GzZC269|I1RMG7|5518|Gibberella	43.45	534	288	8	255	782	159	684	1e-143	447
EFX04404	1954|PHI:1954|GzZC269|I1RMG7|5518|Gibberella	38.58	127	55	4	49	152	14	140	6e-18	86.3
EFX03802	506|PHI:506|URA3|AAA34824|4932|Saccharomyces	46.67	135	69	2	12	146	6	137	4e-30	115
EFX03802	506|PHI:506|URA3|AAA34824|4932|Saccharomyces	38.93	149	69	5	299	440	129	262	6e-22	92.8
EFX04355	2491|PHI:2491|FgPTC1|I1RJS9|5518|Gibberella	35.33	150	85	6	378	525	321	460	1e-17	83.2
EFX03942	882|PHI:882|MGG_04985|EDJ95433|318829|Magnaporthe	30.71	368	227	8	603	963	419	765	5e-53	197
EFX04056	1456|PHI:1456|GzAra004|I1RN15|5518|Gibberella	27.27	374	218	10	30	359	318	681	2e-36	139
EFX03572	538|PHI:538|FRT1|AAU87358|40559|Botrytis	24.63	341	245	7	26	362	85	417	1e-21	94.7
EFX04233	270|PHI:270|RHO1|BAA24262|5476|Candida	29.89	184	99	6	8	175	11	180	5e-15	68.2
EFX04105	1659|PHI:1659|GzCCCH003|I1S245|5518|Gibberella	73.08	338	77	3	29	359	1	331	6e-168	474
EFX04552	1992|PHI:1992|GzZC307|I1R983|5518|Gibberella	40.76	157	88	3	9	163	8	161	8e-30	116
EFX04655	1482|PHI:1482|GzHMG014|I1RKH7|5518|Gibberella	35.26	156	83	3	219	374	195	332	1e-24	100
EFX04188	1177|PHI:1177|(Sc	72.9	642	135	9	18	655	3	609	0	914
EFX03441	1555|PHI:1555|GzMyb019|I1RDG6|5518|Gibberella	24.9	486	319	11	311	772	71	534	1e-41	159
EFX03973	319|PHI:319|SQL2|AAO19638|5270|Ustilago	22.51	471	270	16	518	950	924	1337	1e-16	82.8
EFX04016	2130|PHI:2130|MoHox4|MGG_06285|148305|Magnaporthe	26.43	367	216	12	104	433	54	403	3e-25	106
EFX04741	105|PHI:105|PLB1|AAC61890|5476|Candida	40.39	614	293	14	38	647	20	564	2e-139	424
EFX04681	1479|PHI:1479|GzHMG011|I1RD01|5518|Gibberella	37.95	1315	524	53	49	1277	35	1143	2e-167	531
EFX04588	2654|PHI:2654|DUR1,2|Q59VF3|5476|Candida	37.8	127	78	1	114	240	69	194	6e-12	66.2
EFX03747	2537|PHI:2537|TRR1|Q4WQJ0|746128|Aspergillus	73.33	315	77	3	6	313	26	340	6e-168	474
EFX04401	1814|PHI:1814|GzZC129|I1RV04|5518|Gibberella	37.01	581	277	12	283	826	126	654	2e-103	344
EFX04193	1967|PHI:1967|GzZC282|I1RB16|5518|Gibberella	66.49	764	215	14	44	787	1	743	0	1012
EFX03957	2488|PHI:2488|Man1|G4ND25|148305|Magnaporthe	25.95	551	299	18	70	578	41	524	7e-19	89
EFX03961	2037|PHI:2037|MoRic8|XP_001405357|148305|Magnaporthe	46.27	482	224	7	10	488	7	456	4e-135	401
EFX04312	2315|PHI:2315|ChLae1|G4XKY9|5016|Cochliobolus	33.79	293	183	7	45	329	2	291	3e-41	150
EFX04025	3387	29.9	291	186	9	17	300	1716	1995	5e-26	108
EFX04486	1461|PHI:1461|GzCCAAT001|I1RA31|5518|Gibberella	45.99	324	108	11	2	275	1	307	1e-69	218
EFX03843	3089	25.41	303	184	10	173	457	876	1154	5e-08	53.5
EFX04647	2034|PHI:2034|MFP1|G4MZY1|148305|Magnaporthe	30.61	294	169	9	13	299	628	893	4e-32	125
EFX04158	3381	23.39	466	281	12	110	573	198	589	4e-10	60.1
EFX04637	1503|PHI:1503|GzHMG035|I1S828|5518|Gibberella	27.61	268	149	8	318	585	296	518	1e-11	64.7
EFX04326	1854|PHI:1854|GzZC169|I1S054|5518|Gibberella	22.22	621	370	25	30	617	21	561	5e-10	60.1
EFX04508	1618|PHI:1618|GzFET5|Q4IQT8|5518|Gibberella	70.16	315	73	2	1	315	1	294	4e-162	456
EFX03628	3146	25.79	636	355	26	22	641	32	566	1e-36	142
EFX04580	1633|PHI:1633|GzWing005|I1RC15|5518|Gibberella	40.88	340	186	5	17	351	6	335	2e-84	262
EFX04749	1526|PHI:1526|GzHOMEL036|I1S0J3|5518|Gibberella	30.16	126	86	2	1351	1475	562	686	3e-09	58.9
EFX04022	2407|PHI:2407|MoRIM15|G4NCR0|148305|Magnaporthe	68.81	1930	487	28	12	1928	35	1862	0	2372
EFX03463	1949|PHI:1949|GzZC264|I1RI60|5518|Gibberella	25.17	429	228	12	1	407	1	358	3e-27	109
EFX03727	3417	36.4	566	301	12	2	552	484	1005	9e-96	314
EFX03575	2393|PHI:2393|Related	30.27	489	280	11	70	552	8	441	3e-60	206
EFX03771	3313	23.33	570	355	20	87	633	11	521	3e-24	106
EFX04168	3381	22.37	523	357	17	14	527	157	639	6e-17	81.3
EFX04042	2247|PHI:2247|Sch1|EAT82552|13684|Phaeosphaeria	30.85	282	174	8	5	284	17	279	4e-33	122
EFX04287	1903|PHI:1903|GzZC218|I1RHR4|5518|Gibberella	22.65	437	279	10	14	436	4	395	1e-25	107
EFX04676	2342|PHI:2342|BeNEP2|Q0E7H7|278938|Botrytis	66.94	245	76	2	1	241	1	244	2e-121	347
EFX04124	1681|PHI:1681|GzNF001|I1REN7|5518|Gibberella	46.46	2372	1109	38	9	2348	11	2253	0	2021
EFX04590	445|PHI:445|NOS1||5518|Fusarium	79.88	492	71	2	6	497	5	468	0	817
EFX04000	217|PHI:217|HXK1|EAK93243|5476|Candida	23.48	443	285	17	81	489	68	490	3e-20	91.3
EFX03739	1629|PHI:1629|GzWing001|I1RAH2|5518|Gibberella	68.92	843	194	9	52	883	27	812	0	1128
EFX04534	1562|PHI:1562|GzOB002|I1RAH4|5518|Gibberella	66.57	688	185	12	51	733	56	703	0	900
EFX04534	1562|PHI:1562|GzOB002|I1RAH4|5518|Gibberella	70.04	257	69	1	734	990	770	1018	7e-107	357
EFX04531	2821|PHI:2821|SNF2|Q5ALP9|5476|Candida	28.05	303	171	10	374	671	765	1025	1e-21	99
EFX04531	2821|PHI:2821|SNF2|Q5ALP9|5476|Candida	35.44	158	99	2	816	972	1098	1253	2e-21	97.8
EFX04631	890|PHI:890|MGG_07015|EDJ98043|318829|Magnaporthe	40	605	326	7	317	918	26	596	9e-140	440
EFX04046	2542|PHI:2542|ERG12|Q4WP25|746128|Aspergillus	61.74	494	144	5	2	495	85	533	0	614
EFX04300	2022|PHI:2022|BUF1|MGG_02252|148305|Magnaporthe	31.03	261	167	6	18	267	22	280	2e-36	130
EFX03505	1046|PHI:1046|CTB5|ABK64182|29003|Cercospora	23.66	186	134	3	31	209	1	185	4e-10	58.9
EFX04353	3301	27.27	198	121	8	80	268	69	252	2e-12	62.8
EFX04464	413|PHI:413|MPD1|AAT84078|13684|Stagonospora	24.62	394	262	11	26	393	2	386	2e-19	89.4
EFX03672	1723|PHI:1723|GzZC038|I1S832|5518|Gibberella	33.83	946	492	29	9	900	25	890	7e-138	435
EFX04083	1555|PHI:1555|GzMyb019|I1RDG6|5518|Gibberella	51.83	546	253	4	22	559	2	545	0	588
EFX03636	716|PHI:716|ZEB1|ABB90284|5518|Fusarium	34.17	199	115	8	63	251	126	318	5e-14	71.6
EFX03879	3300	34.56	654	390	9	7	651	25	649	1e-111	357
EFX04600	1260|PHI:1260|FGSG_13944|I1RUC7|5518|Gibberella	30.54	203	133	3	1523	1725	449	643	3e-09	58.9
EFX03759	2315|PHI:2315|ChLae1|G4XKY9|5016|Cochliobolus	32.89	152	94	4	22	167	70	219	9e-19	79.7
EFX03523	2928|PHI:2928|lip22|J9NNZ8|59765|Fusarium	33.83	402	217	14	30	393	36	426	7e-55	188
EFX03632	1260|PHI:1260|FGSG_13944|I1RUC7|5518|Gibberella	42.25	71	41	0	19	89	538	608	1e-11	58.5
EFX03632	1260|PHI:1260|FGSG_13944|I1RUC7|5518|Gibberella	36.9	84	53	0	18	101	438	521	7e-11	56.2
EFX03632	1260|PHI:1260|FGSG_13944|I1RUC7|5518|Gibberella	36.14	83	53	0	19	101	472	554	2e-10	54.7
EFX03632	1260|PHI:1260|FGSG_13944|I1RUC7|5518|Gibberella	36.14	83	53	0	19	101	505	587	7e-10	53.5
EFX03632	1260|PHI:1260|FGSG_13944|I1RUC7|5518|Gibberella	35.8	81	52	0	19	99	571	651	2e-07	45.8
EFX04626	538|PHI:538|FRT1|AAU87358|40559|Botrytis	63.11	553	196	6	31	581	52	598	0	676
EFX03842	2315|PHI:2315|ChLae1|G4XKY9|5016|Cochliobolus	33.67	294	182	8	83	369	3	290	4e-44	154
EFX04231	2968|PHI:2968|Hxs1|J9VQA5|5207|Cryptococcus	28.4	500	300	7	35	525	13	463	2e-63	217
EFX04043	673|PHI:673|Can1|AAZ30050|178876|Cryptococcus	33.67	196	123	3	68	258	13	206	4e-35	125
EFX04750	807|PHI:807|MGG_06951|EDJ98115|318829|Magnaporthe	73.74	457	116	1	7	463	62	514	0	707
EFX04545	748|PHI:748|um00446|Not	39.91	654	312	14	19	614	63	693	3e-137	429
EFX04238	2310|PHI:2310|VGB|I2DB61|27337|Verticillium	26.58	237	142	9	202	424	59	277	8e-10	57.8
EFX04077	601|PHI:601|orf48|AAL20303|216597|Salmonella	23.04	408	235	16	41	408	7	375	4e-07	51.6
EFX03567	2976|PHI:2976|CgOPT1|C6ZRH8|29905|Colletotrichum	24.05	657	436	17	44	671	56	678	5e-46	173
EFX04558	1517|PHI:1517|GzHOMEL013|I1RPZ1|5518|Gibberella	47.26	984	381	20	34	1000	25	887	0	676
EFX03930	3064	67.95	936	240	12	1	921	1	891	0	1257
EFX03556	2602|PHI:2602|Rim9|Q4PH32|5270|Ustilago	26.52	230	119	10	313	528	23	216	2e-10	60.5
EFX03496	1650|PHI:1650|GzWing022|I1S006|5518|Gibberella	51.28	195	67	3	841	1031	178	348	3e-50	189
EFX04465	2570|PHI:2570|CYB2|Q6FM61|5478|Candida	40	65	38	1	5	69	90	153	3e-12	59.3
EFX03483	2968|PHI:2968|Hxs1|J9VQA5|5207|Cryptococcus	26.01	469	308	14	50	506	22	463	3e-37	144
EFX04468	806|PHI:806|MGG_04137|EDJ99440|318829|Magnaporthe	55.42	249	105	3	1	243	1	249	1e-86	259
EFX04109	785|PHI:785|MGG_04128|EDJ99431|318829|Magnaporthe	71.24	525	135	3	16	531	26	543	0	775
EFX03812	1684|PHI:1684|GzRad002|I1RK66|5518|Gibberella	43.28	201	83	3	185	385	116	285	3e-48	169
EFX04420	3332	35.09	171	97	6	309	474	21	182	3e-14	69.7
EFX04241	542|PHI:542|BCCAT2|AAK77951|40559|Botrytis	23.32	313	205	10	24	314	98	397	2e-09	55.8
EFX03892	3390	23.97	292	169	12	1	270	1	261	2e-12	63.2
EFX04416	1972|PHI:1972|GzZC287|I1RF57|5518|Gibberella	30.69	567	338	15	22	545	10	564	2e-79	276
EFX04587	280|PHI:280|CCN1|AAG36938|5207|Cryptococcus	23.11	541	302	26	98	557	90	597	4e-07	51.2
EFX04240	2981|PHI:2981|Ctf1|A6N6J8|59765|Fusarium	66.77	942	214	15	115	1056	60	902	0	1211
EFX04039	211|PHI:211|CaTUP1|AAB63195|5476|Candida	29.92	254	149	8	183	429	260	491	4e-20	90.9
EFX04039	211|PHI:211|CaTUP1|AAB63195|5476|Candida	37.72	114	67	1	331	444	259	368	4e-18	84.7
EFX04039	211|PHI:211|CaTUP1|AAB63195|5476|Candida	25.96	235	154	5	171	405	290	504	3e-16	79
EFX04039	211|PHI:211|CaTUP1|AAB63195|5476|Candida	25	216	118	5	326	526	199	385	6e-09	55.8
EFX04424	2305|PHI:2305|BcFKBP12||40559|Botrytis	41.03	117	55	4	400	503	1	116	4e-15	70.9
EFX03554	1243|PHI:1243|FGSG_06420|I1RBW7|5518|Gibberella	52.17	184	74	3	117	300	209	378	7e-46	170
EFX03554	1243|PHI:1243|FGSG_06420|I1RBW7|5518|Gibberella	40.68	236	97	6	303	537	605	798	1e-45	170
EFX03440	2710|PHI:2710|mepB	53.16	380	172	3	75	451	1	377	4e-140	412
EFX04798	3236	34.11	472	272	12	538	992	88	537	9e-75	256
EFX04263	822|PHI:822|Ip|AAB97419|54734|Mycosphaerella	68.47	295	84	4	3	289	2	295	9e-146	413
EFX03644	350|PHI:350|EMP1|AAR06609|318829|Magnaporthe	52.73	110	49	2	1	107	1	110	2e-26	102
EFX04794	1343|PHI:1343|GzC2H003|I1RAF0|5518|Gibberella	38.25	400	186	10	58	453	17	359	2e-77	248
EFX03594	1542|PHI:1542|GzMyb006|I1RE51|5518|Gibberella	57.57	766	218	14	3	758	2	670	0	810
EFX04354	2911|PHI:2911|Ss-pth2|A7F6V9|5180|Sclerotinia	69.4	621	179	4	1	621	37	646	0	906
EFX04500	210|PHI:210|CAP1|AAD42978|5476|Candida	35.96	559	328	13	12	566	13	545	5e-91	291
EFX03920	1570|PHI:1570|GzOB010|I1RE46|5518|Gibberella	81.44	404	75	0	1	404	1	404	0	712
EFX03920	1570|PHI:1570|GzOB010|I1RE46|5518|Gibberella	58.31	439	135	12	405	843	470	860	2e-139	437
EFX04672	3126	34.64	358	187	11	35	388	29	343	4e-45	167
EFX04380	1441|PHI:1441|GzDDT|I1RFP4|5518|Gibberella	56.61	1044	349	21	2	1010	22	996	0	1031
EFX03800	1603|PHI:1603|GzOB044|I1S0A1|5518|Gibberella	63.69	559	184	6	71	629	1	540	0	756
EFX04197	3274	22.46	601	345	17	144	709	1544	2058	2e-17	85.1
EFX04370	255|PHI:255|FUM1	25.85	325	208	11	29	342	1873	2175	1e-21	94
EFX04805	2065|PHI:2065|MSTU1|Q4R1B9|148305|Magnaporthe	54.44	687	222	29	93	764	1	611	0	570
EFX03818	510|PHI:510|CaNAG3|EAK93097|5476|Candida	24.63	536	353	12	32	561	41	531	7e-38	144
EFX03607	3257	25.74	303	168	9	64	358	144	397	1e-13	70.1
EFX03561	2299|PHI:2299|CHS1|G4XVB6|148305|Magnaporthe	77.21	926	188	9	9	920	13	929	0	1449
EFX03976	3279	83.33	240	32	2	1	232	1	240	1e-134	380
EFX04390	2334|PHI:2334|BcNma|E2GL14|40559|Botrytis	69.87	1052	277	5	807	1858	1	1012	0	1506
EFX03966	1414|PHI:1414|GzC2H081|I1RZL0|5518|Gibberella	38.1	84	50	1	10	93	23	104	5e-11	63.5
EFX04721	82|PHI:82|MAGA|AAB65425|318829|Magnaporthe	89.86	355	36	0	1	355	2	356	0	673
EFX04072	2062|PHI:2062|Gph1|XP_363893|148305|Magnaporthe	81.2	883	163	3	4	884	7	888	0	1517
EFX04224	2327|PHI:2327|HOG1|P0C431|5518|Gibberella	94.49	345	19	0	1	345	1	345	0	692
EFX03820	1577|PHI:1577|GzOB017|I1RK79|5518|Gibberella	69.33	150	43	1	4	153	2	148	1e-72	216
EFX04595	3459	28.22	411	227	16	255	657	53	403	6e-30	121
EFX03527	1288|PHI:1288|FGSG_07812|I1RE83|5518|Gibberella	64.15	424	134	7	153	572	9	418	6e-171	493
EFX03668	2302|PHI:2302|CHS5|G4XVC0|148305|Magnaporthe	68.43	1831	515	22	1	1812	1	1787	0	2545
EFX04149	1056|PHI:1056|CgCHSV|AAL23719|31870|Colletotrichum	74.79	1884	416	13	1	1845	3	1866	0	2910
EFX04327	2305|PHI:2305|BcFKBP12||40559|Botrytis	63.25	117	39	1	1	113	1	117	1e-44	141
EFX04817	2159|PHI:2159|MoMSB2|MGG_06033|148305|Magnaporthe	51.76	340	140	12	624	948	474	804	4e-95	318
EFX04014	1662|PHI:1662|GzCCHC002|I1REJ1|5518|Gibberella	22.38	496	348	10	103	585	657	1128	8e-32	129
EFX03630	612|PHI:612|orf408|AAL20306|216597|Salmonella	26.93	349	196	10	22	365	99	393	3e-18	82.8
EFX03808	1255|PHI:1255|FGSG_07745|I1RQ67|5518|Gibberella	50.61	814	290	24	30	816	35	763	0	689
EFX04819	3378	36.8	231	122	10	22	248	17	227	3e-29	112
EFX04417	2382|PHI:2382|Upa2|Q6QIY0|5270|Ustilago	88.96	299	33	0	819	1117	8	306	0	586
EFX03752	811|PHI:811|MGG_10510|EDK06580|318829|Magnaporthe	31.88	276	114	7	21	247	37	287	2e-35	131
EFX04458	1222|PHI:1222|FGSG_00132|I1RMV6|5518|Gibberella	51.85	1759	585	28	1	1733	1	1523	0	1770
EFX03665	2315|PHI:2315|ChLae1|G4XKY9|5016|Cochliobolus	35.27	292	183	4	54	340	2	292	8e-49	166
EFX03519	2315|PHI:2315|ChLae1|G4XKY9|5016|Cochliobolus	29.79	292	157	7	33	279	2	290	3e-37	133
EFX04330	4194	26.09	483	316	15	12	474	13	474	4e-30	120
EFX03648	2205|PHI:2205|JmjC	35.4	548	188	16	19	417	2	532	1e-89	282
EFX04286	2520|PHI:2520|LYS4|Q4WUL6	26.11	701	401	21	8	669	77	699	5e-47	176
EFX03819	435|PHI:435|VMA7|EAL02110|5476|Candida	58.26	115	47	1	11	124	8	122	5e-46	145
EFX03837	2515|PHI:2515|ALG7|Q4X146|746128|Aspergillus	60	460	146	6	49	475	7	461	0	552
EFX03664	3381	33.7	460	280	6	76	521	189	637	2e-66	228
EFX04629	2570|PHI:2570|CYB2|Q6FM61|5478|Candida	49.81	518	239	9	48	560	79	580	1e-176	514
EFX04726	1413|PHI:1413|GzC2H080|I1RZD4|5518|Gibberella	58.38	997	374	15	35	1022	27	991	0	1128
EFX03564	1414|PHI:1414|GzC2H081|I1RZL0|5518|Gibberella	49.38	81	39	1	101	179	24	104	6e-15	75.1
EFX03967	1757|PHI:1757|GzZC072|I1RYY1|5518|Gibberella	48.27	694	270	12	100	776	23	644	0	656
EFX04201	544|PHI:544|BCMFS1|AAF64435|332648|Botrytis	43.35	549	282	6	4	532	50	589	2e-154	462
EFX04294	2321|PHI:2321|SidI|Q4WR83|746128|Aspergillus	22.41	464	281	16	112	556	66	469	3e-13	70.5
EFX03580	2560|PHI:2560|CNB1|Q6FLU4|5478|Candida	34.04	188	104	7	62	246	1	171	4e-20	83.2
EFX03999	1816|PHI:1816|GzZC131|I1RRS3|5518|Gibberella	35.09	57	37	0	24	80	51	107	3e-09	55.8
EFX04769	55|PHI:55|PKS1|AAB08104|5016|Cochliobolus	23.51	319	195	11	59	365	1857	2138	1e-06	48.1
EFX04649	2609|PHI:2609|KRR1|AAB96910.2|746128|Aspergillus	78.76	306	65	0	1	306	1	306	0	509
EFX04008	2176|PHI:2176|ASD4|MGG_06050|148305|Magnaporthe	43.31	478	183	14	32	430	36	504	1e-80	262
EFX03560	697|PHI:697|ugt51E1|AAM81358|5022|Leptosphaeria	29.79	329	210	10	110	435	82	392	5e-29	115
EFX03451	2396|PHI:2396|GzSYN2|I1RZS5|5518|Gibberella	49.16	297	139	1	20	304	3	299	1e-95	288
EFX04476	1660|PHI:1660|GzCCCH004|I1S4C9|5518|Gibberella	26.74	475	269	16	454	868	608	1063	2e-30	127
EFX04648	2520|PHI:2520|LYS4|Q4WUL6	31.29	473	276	16	64	521	79	517	7e-42	161
EFX03834	1247|PHI:1247|FGSG_02488|I1S0G8|5518|Gibberella	64.29	815	230	17	1	808	1	761	0	1030
EFX03455	211|PHI:211|CaTUP1|AAB63195|5476|Candida	22.65	287	198	6	82	353	210	487	2e-19	86.7
EFX04796	1135|PHI:1135|LmIFRD|C6KED4|5022|Leptosphaeria	28.12	544	271	21	1	524	1	444	6e-28	114
EFX04345	1054|PHI:1054|CgCHSI|AAL23717|31870|Colletotrichum	74.24	924	187	12	29	926	1	899	0	1407
EFX03511	2916|PHI:2916|Ppr2|W7M5P0|117187|Fusarium	78.85	695	103	9	1	692	1	654	0	1048
EFX03975	157|PHI:157|TOXF|AAD45321|5017|Cochliobolus	27.43	339	221	13	58	389	25	345	4e-19	85.5
EFX04811	3147	28.57	84	45	2	22	103	344	414	4e-07	49.3
EFX04166	211|PHI:211|CaTUP1|AAB63195|5476|Candida	31.82	110	69	4	81	187	260	366	1e-08	53.9
EFX04411	3131	58.66	999	301	24	5	995	2	896	0	1004
EFX04708	1616|PHI:1616|GzssDB001|I1RE55|5518|Gibberella	61.45	415	144	3	5	409	15	423	3e-173	531
EFX04708	1616|PHI:1616|GzssDB001|I1RE55|5518|Gibberella	42.99	435	200	13	490	910	600	1000	6e-88	302
EFX03447	1481|PHI:1481|GzHMG013|I1RE60|5518|Gibberella	42.86	287	136	5	295	579	199	459	1e-60	208
EFX03453	860|PHI:860|MSP1|AAX07670|318829|Magnaporthe	73.87	375	86	4	1	363	1	375	0	567
EFX03825	443|PHI:443|CBL1||5518|Fusarium	81.24	421	78	1	23	442	11	431	0	697
EFX03546	3014	39.39	132	61	4	1032	1160	1616	1731	2e-23	105
EFX03643	3060	35.82	134	73	5	451	577	82	209	4e-17	82.8
EFX03643	3060	27.37	95	61	3	466	556	160	250	2e-09	57.8
EFX04716	133|PHI:133|AKT1|BAA36588|5599|Alternaria	30.12	518	289	16	74	575	89	549	1e-45	168
EFX04162	273|PHI:273|SPT3|AAD33888|5476|Candida	48.99	298	140	6	429	715	16	312	3e-82	265
EFX03909	1601|PHI:1601|GzOB042|Q4HYQ4|5518|Gibberella	68.16	1366	416	10	61	1418	53	1407	0	1898
EFX03542	280|PHI:280|CCN1|AAG36938|5207|Cryptococcus	21.72	419	244	12	528	868	78	490	1e-09	59.3
EFX03542	280|PHI:280|CCN1|AAG36938|5207|Cryptococcus	22.32	448	257	14	402	805	92	492	4e-09	57.4
EFX03542	280|PHI:280|CCN1|AAG36938|5207|Cryptococcus	27.66	94	68	0	715	808	58	151	3e-07	51.2
EFX03955	2491|PHI:2491|FgPTC1|I1RJS9|5518|Gibberella	30.67	300	124	10	33	262	155	440	2e-27	112
EFX03867	3629	27.23	459	278	12	130	584	13	419	1e-34	134
EFX04331	323|PHI:323|VFGLU1|AAO63562|93591|Verticillium	36.66	431	227	13	7	413	4	412	1e-81	258
EFX04659	1683|PHI:1683|GzRad001|I1RK33|5518|Gibberella	32	75	50	1	185	258	178	252	4e-11	61.2
EFX04324	598|PHI:598|THIOL|ABB55459|5022|Leptosphaeria	45.81	358	191	2	66	420	1	358	3e-99	302
EFX04445	673|PHI:673|Can1|AAZ30050|178876|Cryptococcus	35.86	198	114	3	12	201	15	207	4e-36	127
EFX04589	1646|PHI:1646|GzWing018|I1RW28|5518|Gibberella	49.27	1031	434	24	75	1068	53	1031	0	833
EFX04699	3457	25.81	527	303	17	10	465	8	517	2e-24	103
EFX03751	2058|PHI:2058|LHS1|MGG_06648.5|148305|Magnaporthe	27.95	458	279	12	16	429	4	454	3e-36	143
EFX04604	2038|PHI:2038|Mir1|MGG_02370|148305|Magnaporthe	29.59	169	102	6	154	317	38	194	4e-08	51.2
EFX04604	2038|PHI:2038|Mir1|MGG_02370|148305|Magnaporthe	26.09	276	161	11	43	299	24	275	4e-07	48.1
EFX03524	1416|PHI:1416|GzC2H083|I1S0D8|5518|Gibberella	29.31	348	165	9	269	610	276	548	4e-33	131
EFX04396	1436|PHI:1436|GzC2H105|I1SA30|5518|Gibberella	36.27	204	67	7	98	301	120	260	5e-28	110
EFX03698	1338|PHI:1338|GzbZIP020|I1S8Y4|5518|Gibberella	37.66	77	41	1	162	231	132	208	5e-08	50.4
EFX03734	1393|PHI:1393|GzC2H056|I1RU69|5518|Gibberella	32.12	800	424	20	40	825	85	779	3e-137	427
EFX03450	573|PHI:573|XYL3|AAC62816|5017|Cochliobolus	49.57	230	105	6	1	227	1	222	1e-74	226
EFX04122	3277	28.38	377	235	15	20	385	24	376	3e-30	117
EFX04543	364|PHI:364|MIT1|EAK95175|5476|Candida	37.83	267	144	9	60	320	19	269	9e-47	166
EFX03801	716|PHI:716|ZEB1|ABB90284|5518|Fusarium	35.41	579	335	11	90	665	20	562	1e-106	336
EFX04475	404|PHI:404|PTH11|AAD30436|318829|Magnaporthe	27.82	266	169	8	42	297	121	373	2e-15	75.9
EFX04686	2097|PHI:2097|Neo1|MGG_04066|148305|Magnaporthe	28.94	1047	569	33	346	1293	354	1324	5e-103	357
EFX04686	2097|PHI:2097|Neo1|MGG_04066|148305|Magnaporthe	35.45	110	66	2	218	327	175	279	5e-11	64.7
EFX04159	1967|PHI:1967|GzZC282|I1RB16|5518|Gibberella	22.05	440	302	12	153	553	191	628	4e-31	126
EFX04248	2940|PHI:2940|MoARK1|G4MV67|148305|Magnaporthe	50.45	1108	363	31	25	1036	19	1036	0	835
EFX04406	438|PHI:438|BcBOT1	27.57	526	284	28	21	506	20	488	2e-25	107
EFX03581	2544|PHI:2544|PAB1|Q4WK03|746128|Aspergillus	67.22	607	176	13	17	617	11	600	0	766
EFX03701	1401|PHI:1401|GzC2H064|I1RVY6|5518|Gibberella	51.7	822	291	19	4	775	79	844	0	726
EFX04403	1439|PHI:1439|GzNot001|I1RW22|5518|Gibberella	56.91	2221	843	27	1	2195	1	2133	0	2483
EFX04032	1707|PHI:1707|GzZC022|I1RJY6|5518|Gibberella	37.87	647	287	15	276	915	175	713	2e-128	409
EFX04001	2094|PHI:2094|Yvc1|MGG_09828|148305|Magnaporthe	67.28	654	196	3	14	664	8	646	0	914
EFX03504	1261|PHI:1261|FGSG_07812|I1RGH4|5518|Gibberella	27.78	450	270	15	6	446	12	415	2e-35	135
EFX03471	3313	63.17	706	220	13	1	672	1	700	0	879
EFX04279	1555|PHI:1555|GzMyb019|I1RDG6|5518|Gibberella	51.57	508	242	2	65	569	39	545	0	559
EFX03533	3457	21.4	257	171	6	43	268	15	271	6e-07	49.3
EFX04142	441|PHI:441|BTP1|CAE55153|40559|Botrytis	19.82	333	223	12	27	332	38	353	2e-07	49.7
EFX04290	2042|PHI:2042|ABC3|Q3Y5V5|148305|Magnaporthe	24.09	303	181	7	331	609	998	1275	2e-09	59.3
EFX04335	1742|PHI:1742|GzZC057|I1S7H5|5518|Gibberella	27.48	626	325	28	84	613	3	595	1e-31	129
EFX04391	2358|PHI:2358|PLD|Q4WZL4|746128|Aspergillus	41.19	522	247	12	365	863	617	1101	2e-114	376
EFX04391	2358|PHI:2358|PLD|Q4WZL4|746128|Aspergillus	41.5	359	159	5	7	328	92	436	3e-83	288
EFX03510	3163	59.6	1188	420	19	1	1175	1	1141	0	1235
EFX03538	1201|PHI:1201|(Bud32)|Q4HYC1|5518|Gibberella	60.47	258	86	3	4	260	20	262	2e-104	305
EFX03558	226|PHI:226|PEX6|AAK16738|5462|Colletotrichum	36.83	505	268	17	252	728	747	1228	6e-77	271
EFX03558	226|PHI:226|PEX6|AAK16738|5462|Colletotrichum	41	239	132	5	222	452	991	1228	1e-49	187
EFX03568	2075|PHI:2075|Moatg7|MGG_07297|148305|Magnaporthe	64.39	702	215	4	4	675	18	714	0	950
EFX03815	2821|PHI:2821|SNF2|Q5ALP9|5476|Candida	29.96	257	135	9	226	466	784	1011	5e-28	119
EFX03815	2821|PHI:2821|SNF2|Q5ALP9|5476|Candida	36	125	79	1	755	878	1119	1243	3e-17	84.7
EFX04633	791|PHI:791|MGG_11899|EDJ98555|318829|Magnaporthe	38.18	55	31	1	238	289	986	1040	9e-07	49.7
EFX03738	311|PHI:311|MGB1|BAC01165|318829|Magnaporthe	24.07	216	149	6	6	219	156	358	9e-10	56.6
EFX04384	167|PHI:167|CHIP3|AAF00024|5457|Colletotrichum	27.72	202	138	3	11	204	104	305	4e-15	74.7
EFX04710	981|PHI:981|hopI1|AAL84247|59511|Pseudomonas	42.62	61	32	1	2	62	373	430	2e-07	48.5
EFX04239	2964|PHI:2964|AsnB|G7TM01|129394|Xanthomonas	47.13	609	247	10	1	583	1	560	3e-169	495
EFX04692	2097|PHI:2097|Neo1|MGG_04066|148305|Magnaporthe	69.52	1342	333	20	7	1298	9	1324	0	1781
EFX03627	1579|PHI:1579|GzOB019|I1RM25|5518|Gibberella	42.03	276	130	6	378	652	523	769	1e-52	199
EFX03627	1579|PHI:1579|GzOB019|I1RM25|5518|Gibberella	29.93	304	186	3	715	1017	774	1051	1e-43	170
EFX03652	2218|PHI:2218|drf1|XP_757288|5270|Ustilago	24.17	422	278	15	363	764	762	1161	2e-16	82.8
EFX03652	2218|PHI:2218|drf1|XP_757288|5270|Ustilago	20.76	448	294	17	1033	1463	1594	1997	2e-10	63.2
EFX03625	178|PHI:178|pabaA|AAD31929|5085|Aspergillus	37.86	523	260	15	336	821	325	819	7e-87	293
EFX03625	178|PHI:178|pabaA|AAD31929|5085|Aspergillus	38.65	251	115	9	3	233	26	257	1e-36	145
EFX04541	2034|PHI:2034|MFP1|G4MZY1|148305|Magnaporthe	31.93	119	66	4	147	260	86	194	1e-08	54.3
EFX04541	2034|PHI:2034|MFP1|G4MZY1|148305|Magnaporthe	31.75	126	79	3	142	266	375	494	9e-08	51.6
EFX03610	2110|PHI:2110|Serine/threonine-protein	86.48	562	57	2	457	999	9	570	0	1026
EFX04630	1287|PHI:1287|FGSG_13944|I1RT82|5518|Gibberella	64.72	445	136	6	28	461	17	451	0	589
EFX03637	2244|PHI:2244|37865|gi|46099354|5270|Ustilago	36.96	349	213	4	26	371	8	352	1e-76	242
EFX03833	2020|PHI:2020|Tup1|XP_759427|5270|Ustilago	24.41	295	194	5	292	559	406	698	1e-28	120
EFX03833	2020|PHI:2020|Tup1|XP_759427|5270|Ustilago	24.07	270	164	6	264	502	466	725	1e-12	68.9
EFX04306	1407|PHI:1407|GzC2H071|I1RX64|5518|Gibberella	28.57	168	111	2	465	627	240	403	3e-08	55.1
EFX04823	2038|PHI:2038|Mir1|MGG_02370|148305|Magnaporthe	27.4	292	170	11	16	298	21	279	4e-11	60.5
EFX03553	3084	34.17	120	75	2	13	132	18	133	2e-18	79.7
EFX04161	1917|PHI:1917|GzZC232|I1RSE9|5518|Gibberella	62.23	736	207	14	24	756	16	683	0	913
EFX03486	348|PHI:348|CSH3|EAK92385|5476|Candida	35.04	117	74	2	25	141	11	125	2e-18	78.6
EFX03686	1681|PHI:1681|GzNF001|I1REN7|5518|Gibberella	26.13	333	158	9	416	716	764	1040	2e-20	94.4
EFX03797	1382|PHI:1382|GzC2H045|I1RRX1|5518|Gibberella	41.22	592	256	19	9	581	13	531	6e-117	359
EFX04082	1354|PHI:1354|GzC2H014|I1RCM9|5518|Gibberella	45.92	392	165	12	232	598	228	597	7e-90	294
EFX04668	1567|PHI:1567|GzOB007|I1RCB7|5518|Gibberella	68.05	169	27	1	1	142	1	169	2e-79	233
EFX04041	2544|PHI:2544|PAB1|Q4WK03|746128|Aspergillus	36.25	80	50	1	277	356	227	305	2e-09	56.6
EFX03940	1316|PHI:1316|GzBrom001|I1RBZ7|5518|Gibberella	46.03	239	110	5	1	226	1	233	2e-65	203
EFX04343	2552|PHI:2552|NOP4|Q4WNM3|746128|Aspergillus	29.53	193	124	4	167	349	49	239	2e-18	84.7
EFX04343	2552|PHI:2552|NOP4|Q4WNM3|746128|Aspergillus	34.09	88	58	0	264	351	42	129	1e-11	63.5
EFX04343	2552|PHI:2552|NOP4|Q4WNM3|746128|Aspergillus	40.98	61	36	0	160	220	319	379	5e-09	55.5
EFX04472	1662|PHI:1662|GzCCHC002|I1REJ1|5518|Gibberella	29.22	438	297	6	52	484	646	1075	2e-63	224
EFX04503	2710|PHI:2710|mepB	63.33	409	142	3	82	486	1	405	0	533
EFX03875	1241|PHI:1241|FGSG_07816|I1RAE2|5518|Gibberella	57.31	616	148	12	7	620	8	510	0	634
EFX04319	211|PHI:211|CaTUP1|AAB63195|5476|Candida	29.63	270	144	8	291	544	187	426	5e-22	96.7
EFX04319	211|PHI:211|CaTUP1|AAB63195|5476|Candida	28.62	269	158	10	274	534	267	509	1e-17	83.2
EFX04319	211|PHI:211|CaTUP1|AAB63195|5476|Candida	26.43	227	143	5	209	428	255	464	4e-13	68.9
EFX03477	1260|PHI:1260|FGSG_13944|I1RUC7|5518|Gibberella	27.52	218	122	8	259	449	396	604	3e-09	58.5
EFX04797	1533|PHI:1533|GzLam002|I1S0F5|5518|Gibberella	65.13	152	49	3	5	155	3	151	4e-65	197
EFX03786	404|PHI:404|PTH11|AAD30436|318829|Magnaporthe	21.67	263	187	8	16	273	120	368	6e-09	54.7
EFX03509	2315|PHI:2315|ChLae1|G4XKY9|5016|Cochliobolus	33.22	289	186	6	30	311	2	290	8e-49	165
EFX03884	1330|PHI:1330|GzbZIP012|I1RUH0|5518|Gibberella	55.56	63	28	0	141	203	99	161	3e-17	74.7
EFX03660	2388|PHI:2388|Chi2|0|5530|Metarhizium	35.88	301	147	15	26	302	39	317	6e-39	149
EFX04444	552|PHI:552|BcLCC2|AAK77953|40559|Botrytis	48.12	532	249	11	1	510	1	527	6e-165	482
EFX04023	2189|PHI:2189|MoGIS2|G4MRA3|148305|Magnaporthe	78.88	232	41	3	1	227	1	229	8e-117	334
EFX04827	2020|PHI:2020|Tup1|XP_759427|5270|Ustilago	24.59	305	188	6	63	336	415	708	5e-21	95.5
EFX04827	2020|PHI:2020|Tup1|XP_759427|5270|Ustilago	24.34	267	167	7	72	313	471	727	1e-16	81.3
EFX04827	2020|PHI:2020|Tup1|XP_759427|5270|Ustilago	24.02	229	141	4	60	260	501	724	4e-16	79.7
EFX04827	2020|PHI:2020|Tup1|XP_759427|5270|Ustilago	28.29	152	91	4	41	177	576	724	2e-08	55.1
EFX04528	2044|PHI:2044|MoSOM1|XP_362263|148305|Magnaporthe	47.43	797	280	28	33	797	73	762	2e-137	427
EFX03995	1579|PHI:1579|GzOB019|I1RM25|5518|Gibberella	29.14	724	396	15	693	1415	527	1134	3e-83	296
EFX03956	2962|PHI:2962|glyA|C5BEV2|67780|Edwardsiella	44.31	413	197	8	48	455	7	391	5e-100	309
EFX04469	854|PHI:854|um01947|EAK82380|5270|Ustilago	33.95	215	94	11	14	224	421	591	6e-18	80.5
EFX04052	3278	30.2	202	135	2	931	1130	1107	1304	1e-21	100
EFX04628	213|PHI:213|CPA1|AAF69795|5207|Cryptococcus	61.08	167	57	2	12	178	4	162	6e-65	206
EFX04210	1440|PHI:1440|GzNot002|I1SA65|5518|Gibberella	60.94	617	197	13	1	613	1	577	0	627
EFX03478	1417|PHI:1417|GzC2H084|I1S0W0|5518|Gibberella	50	76	35	2	154	226	111	186	2e-17	78.6
EFX03624	823|PHI:823|beta-tubulin|CAA56936|38038|Rhynchosporium	31.53	425	252	8	7	408	20	428	3e-73	237
EFX04791	373|PHI:373|PLD1|EAK93902|5476|Candida	52.91	722	322	7	752	1464	428	1140	0	754
EFX04791	373|PHI:373|PLD1|EAK93902|5476|Candida	35.38	130	63	3	500	611	208	334	3e-13	72.8
EFX04791	373|PHI:373|PLD1|EAK93902|5476|Candida	54.17	48	22	0	1790	1837	1662	1709	2e-10	63.2
EFX04791	373|PHI:373|PLD1|EAK93902|5476|Candida	31.39	137	77	5	1643	1770	1451	1579	3e-08	56.6
EFX04735	1629|PHI:1629|GzWing001|I1RAH2|5518|Gibberella	42.73	110	60	1	12	118	695	804	2e-27	105
EFX04645	1438|PHI:1438|GzC2H107|I1SAT3|5518|Gibberella	56.98	86	24	4	269	354	9	81	4e-20	85.1
EFX03790	1552|PHI:1552|GzMyb016|I1S0N5|5518|Gibberella	76.77	1158	205	13	1	1138	1	1114	0	1733
EFX04760	2080|PHI:2080|Moatg13|MGG_00454|148305|Magnaporthe	43.18	1049	317	37	1	1040	1	779	0	603
EFX04572	2038|PHI:2038|Mir1|MGG_02370|148305|Magnaporthe	30.05	193	120	5	28	211	39	225	2e-14	69.7
EFX04713	1623|PHI:1623|GzJUM005|I1S9T2|5518|Gibberella	28.14	167	99	4	196	348	303	462	1e-09	57
EFX04018	2357|PHI:2357|CYP52X1|E2EAF6|475271|Beauveria	25.23	432	266	14	76	475	90	496	1e-24	105
EFX03468	815|PHI:815|MGG_04685|EDJ95941|318829|Magnaporthe	46.14	1205	436	45	326	1443	368	1446	0	764
EFX04357	2654|PHI:2654|DUR1,2|Q59VF3|5476|Candida	29.7	202	115	5	105	304	70	246	4e-07	50.4
EFX04143	2898|PHI:2896|BEC1005|CCU82697|62688|Blumeria	28.3	318	197	11	1	312	1	293	8e-27	107
EFX04778	2954|PHI:2954|TgNST1|B6KLD2|5811|Toxoplasma	33.96	374	176	10	17	385	26	333	9e-50	173
EFX03470	2247|PHI:2247|Sch1|EAT82552|13684|Phaeosphaeria	34.28	283	165	5	5	283	12	277	6e-43	149
EFX03777	1046|PHI:1046|CTB5|ABK64182|29003|Cercospora	27.59	464	299	10	50	486	3	456	6e-49	174
EFX04254	1635|PHI:1635|GzWing007|I1RFX1|5518|Gibberella	30.27	370	237	10	614	964	25	392	4e-39	149
EFX04268	2260|PHI:2260|PKS1|G8DNT0|45130|Cochliobolus	37.11	1703	894	38	35	1693	158	1727	0	1039
EFX04804	4194	27.15	501	325	12	3	488	4	479	3e-52	185
EFX04133	2034|PHI:2034|MFP1|G4MZY1|148305|Magnaporthe	26.95	141	98	1	6	141	49	189	2e-08	52
EFX03846	2256|PHI:2256|Xdh1|Q0UA24|13684|Phaeosphaeria	28.35	381	200	14	13	372	21	349	3e-29	114
EFX04643	1662|PHI:1662|GzCCHC002|I1REJ1|5518|Gibberella	31.29	457	276	9	48	493	646	1075	2e-62	221
EFX04489	24|PHI:24|Avenacinase	42.12	819	399	17	10	790	7	788	0	563
EFX04092	2240|PHI:2240|Srt1|Q4PBY9|5270|Ustilago	25	468	335	6	64	521	32	493	9e-38	143
EFX03988	413|PHI:413|MPD1|AAT84078|13684|Stagonospora	24.43	393	243	12	4	373	10	371	3e-16	78.2
EFX03755	3808	58.28	580	182	13	1	574	1	526	0	555
EFX03896	1579|PHI:1579|GzOB019|I1RM25|5518|Gibberella	33.33	717	400	16	15	727	505	1147	1e-116	380
EFX04691	3146	26.8	556	332	17	26	558	32	535	3e-45	167
EFX04019	903|PHI:903|um01888||5270|Ustilago	50	540	253	8	9	539	3	534	0	558
EFX03721	1667|PHI:1667|GzCCHC007|I1RZP2|5518|Gibberella	64.64	478	145	5	1	462	1	470	0	616
EFX04393	1535|PHI:1535|GzMADS002|I1RXD6|5518|Gibberella	50.22	454	194	9	36	489	1	422	2e-150	438
EFX03761	3067	42.61	399	195	9	115	510	63	430	4e-74	268
EFX04815	3175	75.24	319	78	1	1	319	51	368	4e-173	488
EFX04316	1332|PHI:1332|GzbZIP014|I1RXD5|5518|Gibberella	35.19	108	67	1	190	297	185	289	4e-15	73.2
EFX04037	1596|PHI:1596|GzOB036|I1RXD4|5518|Gibberella	57.14	84	36	0	2	85	3	86	9e-29	105
EFX04554	1488|PHI:1488|GzHMG020|I1RSA6|5518|Gibberella	37.94	630	266	25	808	1419	738	1260	3e-90	318
EFX03685	2832|PHI:2832|AKT3-1|Q9P4U9|5599|Alternaria	25.68	148	103	3	73	220	24	164	7e-07	48.5
EFX04058	2834|PHI:2834|LAM1|C3PTB1|5016|Cochliobolus	30.07	153	102	5	164	312	5	156	1e-10	59.7
EFX04244	1279|PHI:1279|FGSG_12132|I1RU59|5518|Gibberella	27.67	524	309	20	20	494	112	614	8e-39	149
EFX04527	2976|PHI:2976|CgOPT1|C6ZRH8|29905|Colletotrichum	29.24	643	422	11	32	658	52	677	3e-85	286
EFX03923	2248|PHI:2248|Als1|Q1L2E2|13684|Phaeosphaeria	24.54	269	172	6	115	364	174	430	7e-17	80.9
EFX03708	2533|PHI:2533|FKS1|Q4WLT4|746128|Aspergillus	72.13	1916	482	18	6	1908	1	1877	0	2835
EFX04487	1493|PHI:1493|GzHMG025|I1RUP7|5518|Gibberella	44.35	575	228	16	125	681	199	699	2e-138	423
EFX03614	2841|PHI:2841|CnSEC14-2|F6K8L6|5207|Cryptococcus	23.25	228	128	7	137	347	53	250	5e-11	60.5
EFX04605	1393|PHI:1393|GzC2H056|I1RU69|5518|Gibberella	26.21	206	133	10	143	341	572	765	1e-14	74.3
EFX04717	3663	23.86	415	272	9	25	409	8	408	6e-22	95.1
EFX04440	1451|PHI:1451|GzGH|I1RQL1|5518|Gibberella	54.89	818	280	24	13	823	54	789	0	767
EFX04520	367|PHI:367|MRB1|AAT81148|5270|Ustilago	32.58	264	149	6	39	295	33	274	4e-37	133
EFX04136	507|PHI:507|CaRAS1|AAF03566|5476|Candida	38.76	178	80	3	28	205	17	165	5e-29	111
EFX04410	2025|PHI:2025|HDL1|G4MQZ9|148305|Magnaporthe	31.01	129	72	4	87	199	214	341	7e-09	54.7
EFX03990	242|PHI:242|CaTPS2|CAC17748|5476|Candida	44.42	878	402	16	18	883	27	830	0	717
EFX04332	3384	31.85	1124	657	39	33	1136	22	1056	6e-150	481
EFX03703	2269|PHI:2269|Mdh1|0|13684|Phaeosphaeria	26.05	311	164	13	1	298	7	264	3e-11	60.1
EFX03532	1807|PHI:1807|GzZC122|I1RUM5|5518|Gibberella	42.11	653	280	19	61	640	111	738	2e-133	410
EFX04399	1555|PHI:1555|GzMyb019|I1RDG6|5518|Gibberella	26.87	227	156	5	57	276	73	296	1e-21	95.5
EFX03589	2009|PHI:2009|HOS4|EDK06449|148305|Magnaporthe	39.18	97	59	0	1497	1593	386	482	2e-10	63.2
EFX03589	2009|PHI:2009|HOS4|EDK06449|148305|Magnaporthe	29.67	209	106	8	1360	1535	416	616	1e-07	54.3
EFX04561	2968|PHI:2968|Hxs1|J9VQA5|5207|Cryptococcus	27.19	342	211	15	12	329	68	395	2e-21	93.2
EFX03766	2315|PHI:2315|ChLae1|G4XKY9|5016|Cochliobolus	33.45	296	170	10	50	326	3	290	7e-41	144
EFX04763	2269|PHI:2269|Mdh1|0|13684|Phaeosphaeria	27.62	286	166	10	3	278	8	262	8e-18	78.6
EFX04035	2638|PHI:2638|Ilv3A|Q4X099|746128|Aspergillus	31.17	571	358	12	123	683	54	599	7e-63	220
EFX03945	2315|PHI:2315|ChLae1|G4XKY9|5016|Cochliobolus	28.83	326	187	8	124	441	2	290	2e-36	134
EFX04302	3225	34.21	190	105	4	60	229	22	211	4e-33	125
EFX04526	3225	21.33	347	212	7	8	294	27	372	1e-19	90.1
EFX03912	4194	26.37	474	288	12	46	485	29	475	7e-34	131
EFX04156	2247|PHI:2247|Sch1|EAT82552|13684|Phaeosphaeria	38.77	276	156	6	9	282	13	277	1e-42	148
EFX03433	2315|PHI:2315|ChLae1|G4XKY9|5016|Cochliobolus	30.83	266	173	7	13	269	29	292	3e-24	97.1
EFX03641	1424|PHI:1424|GzC2H092|I1S3J7|5518|Gibberella	50	62	30	1	954	1015	483	543	2e-08	55.5
EFX04296	2171|PHI:2171|Peroxisomal	22.75	422	267	16	392	782	266	659	6e-13	69.7
EFX04081	2087|PHI:2087|Moatg26|MGG_03459|148305|Magnaporthe	60.51	1385	394	25	370	1712	239	1512	0	1603
EFX04081	2087|PHI:2087|Moatg26|MGG_03459|148305|Magnaporthe	40.58	138	63	4	36	173	20	138	3e-14	75.9
EFX03888	1270|PHI:1270|FGSG_06420|I1RHA1|5518|Gibberella	45.28	53	26	1	6	58	188	237	3e-09	51.6
EFX03764	1389|PHI:1389|GzC2H052|I1RTJ6|5518|Gibberella	55.65	796	296	16	28	782	24	803	0	816
EFX04729	784|PHI:784|MGG_00056|EDK03390|318829|Magnaporthe	33.2	259	163	5	10	263	18	271	3e-26	102
EFX04756	2654|PHI:2654|DUR1,2|Q59VF3|5476|Candida	30.77	208	135	3	68	275	38	236	7e-13	68.9
EFX04034	697|PHI:697|ugt51E1|AAM81358|5022|Leptosphaeria	27.14	339	198	13	32	360	88	387	9e-21	90.5
EFX04021	1581|PHI:1581|GzOB021|I1RPX8|5518|Gibberella	51.72	261	124	2	7	267	15	273	1e-95	287
EFX04255	1233|PHI:1233|FGSG_13944|I1RUG2|5518|Gibberella	68.21	390	87	5	52	415	98	476	0	551
[truncated: 737 more rows]
