# Supplementary material for: De novo genome assembly of Geosmithia morbida, the causal agent of thousand cankers disease
Source: PeerJ. 2016 May 2;4:e1952. doi: 10.7717/peerj.1952 (PMC4860301; doi:10.7717/peerj.1952)
Supplement: Supplemental Information 5 [file peerj-04-1952-s005.xlsx]

## Sheet: Sheet1
# SignalP-4.1 euk predictions
name Cmax pos Ymax pos Smax pos Smean D ? Dmaxcut Networks-used
EFX01560	0.623	21	0.737	21	0.923	5	0.867	0.807	Y	0.45	SignalP-noTM
EFX05126	0.751	21	0.822	21	0.955	4	0.902	0.865	Y	0.45	SignalP-noTM
EFX05124	0.177	13	0.38	13	0.902	12	0.839	0.628	Y	0.45	SignalP-noTM
EFX05125	0.149	17	0.17	17	0.249	7	0.182	0.176	N	0.45	SignalP-noTM
EFX00917	0.183	27	0.207	27	0.395	1	0.246	0.228	N	0.45	SignalP-noTM
EFX00827	0.16	29	0.174	29	0.274	7	0.191	0.184	N	0.45	SignalP-noTM
EFX00946	0.151	48	0.148	48	0.217	36	0.124	0.135	N	0.45	SignalP-noTM
EFX00935	0.192	28	0.281	28	0.66	7	0.409	0.35	N	0.45	SignalP-noTM
EFX00863	0.107	11	0.105	39	0.114	29	0.1	0.102	N	0.45	SignalP-noTM
EFX00872	0.114	55	0.109	25	0.118	12	0.104	0.106	N	0.45	SignalP-noTM
EFX00780	0.111	48	0.108	34	0.121	24	0.103	0.105	N	0.45	SignalP-noTM
EFX00905	0.111	34	0.103	42	0.115	36	0.096	0.099	N	0.45	SignalP-noTM
EFX00868	0.266	36	0.177	36	0.335	8	0.156	0.169	N	0.5	SignalP-TM
EFX00778	0.144	67	0.129	67	0.197	66	0.101	0.118	N	0.5	SignalP-TM
EFX00774	0.125	16	0.109	41	0.122	31	0.1	0.105	N	0.45	SignalP-noTM
EFX00856	0.106	58	0.108	35	0.118	24	0.096	0.103	N	0.5	SignalP-TM
EFX00980	0.181	49	0.151	65	0.292	34	0.134	0.144	N	0.5	SignalP-TM
EFX00850	0.541	23	0.69	23	0.959	5	0.881	0.793	Y	0.45	SignalP-noTM
EFX00857	0.133	23	0.211	11	0.505	1	0.314	0.266	N	0.45	SignalP-noTM
EFX00812	0.122	33	0.114	39	0.129	38	0.108	0.111	N	0.45	SignalP-noTM
EFX00864	0.111	62	0.134	13	0.229	10	0.174	0.155	N	0.45	SignalP-noTM
EFX00964	0.137	23	0.131	23	0.171	13	0.126	0.128	N	0.45	SignalP-noTM
EFX00881	0.121	39	0.109	39	0.107	69	0.094	0.101	N	0.45	SignalP-noTM
EFX00908	0.111	21	0.123	16	0.197	13	0.144	0.134	N	0.45	SignalP-noTM
EFX00785	0.147	26	0.129	26	0.184	44	0.112	0.12	N	0.45	SignalP-noTM
EFX00969	0.119	32	0.11	44	0.133	31	0.101	0.105	N	0.45	SignalP-noTM
EFX00823	0.114	52	0.117	52	0.13	33	0.105	0.11	N	0.45	SignalP-noTM
EFX00805	0.171	34	0.176	34	0.365	33	0.193	0.185	N	0.45	SignalP-noTM
EFX00942	0.127	21	0.179	11	0.457	1	0.261	0.212	N	0.5	SignalP-TM
EFX00781	0.117	40	0.108	21	0.154	13	0.112	0.11	N	0.45	SignalP-noTM
EFX00921	0.192	35	0.159	35	0.25	1	0.148	0.153	N	0.45	SignalP-noTM
EFX00936	0.134	24	0.127	24	0.152	2	0.121	0.124	N	0.45	SignalP-noTM
EFX00861	0.111	51	0.111	39	0.128	32	0.108	0.109	N	0.45	SignalP-noTM
EFX00833	0.12	26	0.175	26	0.413	7	0.249	0.215	N	0.45	SignalP-noTM
EFX00769	0.215	54	0.176	32	0.288	3	0.18	0.178	N	0.45	SignalP-noTM
EFX00954	0.11	64	0.107	42	0.115	26	0.092	0.099	N	0.45	SignalP-noTM
EFX00883	0.108	59	0.117	63	0.184	61	0.105	0.112	N	0.5	SignalP-TM
EFX00926	0.125	42	0.115	42	0.133	39	0.099	0.106	N	0.45	SignalP-noTM
EFX00798	0.114	17	0.136	17	0.238	9	0.164	0.151	N	0.45	SignalP-noTM
EFX00755	0.107	22	0.106	45	0.12	31	0.101	0.103	N	0.45	SignalP-noTM
EFX00957	0.156	41	0.129	41	0.151	38	0.103	0.115	N	0.45	SignalP-noTM
EFX00924	0.186	36	0.149	36	0.264	35	0.12	0.133	N	0.45	SignalP-noTM
EFX00910	0.128	28	0.115	28	0.13	10	0.105	0.11	N	0.45	SignalP-noTM
EFX00771	0.11	36	0.109	36	0.122	30	0.103	0.106	N	0.45	SignalP-noTM
EFX00970	0.125	19	0.14	17	0.226	15	0.158	0.15	N	0.45	SignalP-noTM
EFX00759	0.11	51	0.105	51	0.124	50	0.102	0.103	N	0.45	SignalP-noTM
EFX00877	0.166	32	0.154	32	0.286	3	0.159	0.156	N	0.45	SignalP-noTM
EFX00904	0.105	58	0.106	69	0.144	61	0.09	0.099	N	0.5	SignalP-TM
EFX00922	0.112	55	0.122	11	0.17	1	0.114	0.117	N	0.45	SignalP-noTM
EFX00786	0.112	25	0.127	11	0.177	1	0.124	0.126	N	0.45	SignalP-noTM
EFX00793	0.109	63	0.107	28	0.124	11	0.105	0.106	N	0.45	SignalP-noTM
EFX00906	0.152	22	0.156	22	0.309	19	0.162	0.159	N	0.45	SignalP-noTM
EFX00930	0.119	33	0.11	33	0.119	11	0.099	0.104	N	0.45	SignalP-noTM
EFX00817	0.353	19	0.381	19	0.522	15	0.413	0.398	N	0.45	SignalP-noTM
EFX00891	0.262	24	0.488	24	0.967	5	0.909	0.716	Y	0.45	SignalP-noTM
EFX00943	0.109	63	0.107	44	0.121	38	0.102	0.105	N	0.45	SignalP-noTM
EFX00901	0.16	37	0.168	37	0.279	33	0.172	0.17	N	0.45	SignalP-noTM
EFX00843	0.132	17	0.149	17	0.241	14	0.162	0.154	N	0.5	SignalP-TM
EFX00959	0.478	19	0.675	19	0.981	5	0.96	0.829	Y	0.45	SignalP-noTM
EFX00819	0.107	60	0.109	12	0.123	50	0.107	0.108	N	0.45	SignalP-noTM
EFX00878	0.188	70	0.137	70	0.14	18	0.099	0.116	N	0.45	SignalP-noTM
EFX00825	0.223	26	0.186	26	0.401	22	0.155	0.169	N	0.45	SignalP-noTM
EFX00938	0.422	20	0.563	20	0.838	12	0.761	0.67	Y	0.45	SignalP-noTM
EFX00898	0.127	58	0.161	11	0.294	1	0.189	0.176	N	0.45	SignalP-noTM
EFX00831	0.119	31	0.109	31	0.138	37	0.102	0.105	N	0.45	SignalP-noTM
EFX00836	0.113	68	0.11	35	0.14	21	0.108	0.109	N	0.45	SignalP-noTM
EFX00867	0.111	47	0.11	40	0.13	31	0.102	0.105	N	0.45	SignalP-noTM
EFX00919	0.11	66	0.109	34	0.125	21	0.102	0.105	N	0.45	SignalP-noTM
EFX00767	0.132	32	0.12	32	0.223	29	0.106	0.113	N	0.45	SignalP-noTM
EFX00894	0.841	21	0.855	21	0.923	12	0.869	0.863	Y	0.45	SignalP-noTM
EFX00838	0.144	62	0.124	62	0.141	3	0.11	0.116	N	0.45	SignalP-noTM
EFX00809	0.119	28	0.112	28	0.122	2	0.106	0.108	N	0.45	SignalP-noTM
EFX00948	0.135	32	0.151	32	0.366	30	0.163	0.158	N	0.45	SignalP-noTM
EFX00783	0.12	38	0.114	12	0.161	37	0.112	0.113	N	0.45	SignalP-noTM
EFX00851	0.155	29	0.153	21	0.277	7	0.194	0.169	N	0.5	SignalP-TM
EFX00779	0.128	33	0.119	43	0.229	40	0.104	0.111	N	0.45	SignalP-noTM
EFX00810	0.118	40	0.112	40	0.124	1	0.103	0.107	N	0.45	SignalP-noTM
EFX00975	0.119	38	0.11	38	0.134	34	0.099	0.104	N	0.45	SignalP-noTM
EFX00880	0.152	43	0.129	13	0.189	3	0.161	0.147	N	0.45	SignalP-noTM
EFX00754	0.152	38	0.124	38	0.132	43	0.099	0.11	N	0.45	SignalP-noTM
EFX00803	0.115	50	0.109	50	0.127	48	0.102	0.106	N	0.45	SignalP-noTM
EFX00983	0.111	51	0.105	16	0.12	7	0.105	0.105	N	0.45	SignalP-noTM
EFX00828	0.212	22	0.26	22	0.515	2	0.311	0.287	N	0.45	SignalP-noTM
EFX00932	0.13	32	0.125	12	0.232	2	0.134	0.13	N	0.45	SignalP-noTM
EFX00821	0.166	22	0.14	22	0.154	1	0.116	0.127	N	0.45	SignalP-noTM
EFX00847	0.11	49	0.113	12	0.17	29	0.118	0.116	N	0.45	SignalP-noTM
EFX00971	0.178	23	0.143	23	0.248	43	0.134	0.14	N	0.5	SignalP-TM
EFX00939	0.116	16	0.119	16	0.136	5	0.124	0.122	N	0.45	SignalP-noTM
EFX00855	0.111	38	0.107	38	0.11	25	0.101	0.104	N	0.45	SignalP-noTM
EFX00885	0.113	65	0.114	11	0.132	2	0.111	0.112	N	0.45	SignalP-noTM
EFX00762	0.117	21	0.254	11	0.745	1	0.485	0.379	N	0.45	SignalP-noTM
EFX00753	0.121	44	0.112	44	0.14	43	0.105	0.108	N	0.45	SignalP-noTM
EFX00818	0.111	59	0.106	59	0.119	47	0.097	0.101	N	0.45	SignalP-noTM
EFX00789	0.118	59	0.128	12	0.172	1	0.141	0.135	N	0.45	SignalP-noTM
EFX00965	0.109	68	0.115	11	0.147	9	0.118	0.117	N	0.45	SignalP-noTM
EFX00824	0.158	41	0.13	41	0.206	12	0.115	0.122	N	0.45	SignalP-noTM
EFX00832	0.109	53	0.105	70	0.111	58	0.095	0.1	N	0.45	SignalP-noTM
EFX00940	0.114	35	0.114	47	0.183	42	0.108	0.111	N	0.45	SignalP-noTM
EFX00840	0.113	8	0.109	42	0.115	32	0.097	0.102	N	0.45	SignalP-noTM
EFX00928	0.164	57	0.118	42	0.23	39	0.11	0.115	N	0.5	SignalP-TM
EFX00982	0.123	27	0.143	12	0.255	1	0.142	0.143	N	0.45	SignalP-noTM
EFX00862	0.142	29	0.148	28	0.223	4	0.161	0.155	N	0.45	SignalP-noTM
EFX00842	0.192	45	0.158	45	0.188	40	0.112	0.133	N	0.45	SignalP-noTM
EFX00958	0.286	27	0.319	27	0.505	13	0.377	0.342	N	0.5	SignalP-TM
EFX00858	0.125	49	0.127	11	0.225	48	0.138	0.133	N	0.45	SignalP-noTM
EFX00984	0.109	61	0.113	11	0.15	5	0.12	0.116	N	0.45	SignalP-noTM
EFX00968	0.116	57	0.108	57	0.123	37	0.098	0.102	N	0.45	SignalP-noTM
EFX00839	0.11	65	0.109	65	0.131	2	0.1	0.104	N	0.45	SignalP-noTM
EFX00859	0.303	22	0.173	22	0.14	20	0.099	0.133	N	0.45	SignalP-noTM
EFX00876	0.109	58	0.112	38	0.127	25	0.104	0.108	N	0.45	SignalP-noTM
EFX00916	0.148	34	0.14	12	0.256	2	0.173	0.158	N	0.45	SignalP-noTM
EFX00986	0.113	56	0.107	56	0.119	3	0.1	0.103	N	0.45	SignalP-noTM
EFX00860	0.125	35	0.122	11	0.158	3	0.137	0.13	N	0.45	SignalP-noTM
EFX00973	0.132	23	0.113	23	0.124	1	0.097	0.104	N	0.45	SignalP-noTM
EFX00775	0.11	66	0.107	66	0.118	64	0.096	0.101	N	0.45	SignalP-noTM
EFX00835	0.128	36	0.108	36	0.121	36	0.094	0.1	N	0.45	SignalP-noTM
EFX00846	0.11	53	0.105	39	0.113	22	0.094	0.099	N	0.45	SignalP-noTM
EFX00899	0.114	23	0.114	39	0.159	36	0.111	0.113	N	0.45	SignalP-noTM
EFX00791	0.158	46	0.169	46	0.287	44	0.148	0.158	N	0.45	SignalP-noTM
EFX00760	0.108	12	0.127	12	0.183	4	0.138	0.133	N	0.45	SignalP-noTM
EFX00896	0.115	22	0.108	32	0.132	59	0.097	0.104	N	0.5	SignalP-TM
EFX00765	0.112	33	0.114	12	0.136	1	0.105	0.109	N	0.45	SignalP-noTM
EFX00879	0.118	39	0.125	39	0.159	37	0.114	0.12	N	0.5	SignalP-TM
EFX00909	0.135	26	0.134	26	0.174	1	0.134	0.134	N	0.45	SignalP-noTM
EFX00953	0.109	57	0.103	70	0.119	55	0.097	0.1	N	0.45	SignalP-noTM
EFX00761	0.112	21	0.106	52	0.114	34	0.102	0.104	N	0.45	SignalP-noTM
EFX00978	0.483	19	0.243	19	0.158	3	0.12	0.177	N	0.45	SignalP-noTM
EFX00820	0.111	46	0.112	27	0.164	11	0.114	0.113	N	0.45	SignalP-noTM
EFX00985	0.192	28	0.264	28	0.441	25	0.33	0.291	N	0.5	SignalP-TM
EFX00889	0.328	44	0.205	44	0.202	10	0.119	0.17	N	0.5	SignalP-TM
EFX00937	0.111	60	0.108	64	0.119	32	0.103	0.105	N	0.45	SignalP-noTM
EFX00979	0.11	69	0.109	14	0.116	2	0.104	0.106	N	0.45	SignalP-noTM
EFX00848	0.11	44	0.136	12	0.189	1	0.162	0.15	N	0.45	SignalP-noTM
EFX00815	0.201	18	0.157	18	0.212	13	0.126	0.14	N	0.45	SignalP-noTM
EFX00974	0.111	66	0.11	42	0.118	26	0.107	0.108	N	0.45	SignalP-noTM
EFX00870	0.138	36	0.113	36	0.122	15	0.096	0.104	N	0.45	SignalP-noTM
EFX00988	0.109	59	0.105	59	0.108	44	0.099	0.102	N	0.45	SignalP-noTM
EFX00888	0.107	35	0.105	11	0.116	1	0.099	0.102	N	0.45	SignalP-noTM
EFX00961	0.197	20	0.158	20	0.158	26	0.126	0.141	N	0.45	SignalP-noTM
EFX00799	0.194	18	0.175	18	0.218	14	0.161	0.168	N	0.45	SignalP-noTM
EFX00816	0.111	64	0.107	64	0.114	51	0.097	0.102	N	0.45	SignalP-noTM
EFX00977	0.118	44	0.138	11	0.239	3	0.144	0.142	N	0.45	SignalP-noTM
EFX00790	0.113	35	0.109	25	0.129	24	0.107	0.108	N	0.45	SignalP-noTM
EFX00933	0.294	22	0.461	22	0.849	17	0.72	0.601	Y	0.45	SignalP-noTM
EFX00841	0.175	36	0.142	36	0.172	49	0.103	0.126	N	0.5	SignalP-TM
EFX00949	0.125	28	0.11	28	0.124	5	0.101	0.105	N	0.45	SignalP-noTM
EFX00966	0.139	39	0.118	39	0.127	33	0.098	0.107	N	0.45	SignalP-noTM
EFX00892	0.11	20	0.107	32	0.13	12	0.104	0.105	N	0.45	SignalP-noTM
EFX00782	0.118	22	0.164	11	0.327	1	0.247	0.197	N	0.5	SignalP-TM
EFX00972	0.125	26	0.162	26	0.317	8	0.206	0.185	N	0.45	SignalP-noTM
EFX00837	0.109	20	0.107	42	0.114	23	0.104	0.105	N	0.45	SignalP-noTM
EFX00963	0.15	36	0.141	44	0.174	26	0.124	0.132	N	0.45	SignalP-noTM
EFX00955	0.15	15	0.134	37	0.181	29	0.122	0.127	N	0.45	SignalP-noTM
EFX00907	0.113	50	0.108	25	0.125	21	0.105	0.106	N	0.45	SignalP-noTM
EFX00887	0.168	30	0.13	30	0.154	41	0.1	0.114	N	0.45	SignalP-noTM
EFX00873	0.111	50	0.105	50	0.11	37	0.092	0.098	N	0.45	SignalP-noTM
EFX00772	0.107	25	0.105	25	0.115	15	0.101	0.103	N	0.45	SignalP-noTM
EFX00947	0.109	59	0.105	59	0.113	51	0.098	0.101	N	0.45	SignalP-noTM
EFX00794	0.398	22	0.282	22	0.282	10	0.2	0.238	N	0.45	SignalP-noTM
EFX00976	0.116	33	0.108	51	0.128	2	0.101	0.104	N	0.45	SignalP-noTM
EFX00830	0.118	17	0.108	17	0.125	22	0.102	0.105	N	0.45	SignalP-noTM
EFX00869	0.195	17	0.197	17	0.244	1	0.182	0.189	N	0.45	SignalP-noTM
EFX00950	0.112	44	0.106	44	0.111	37	0.095	0.1	N	0.45	SignalP-noTM
EFX00802	0.187	52	0.211	52	0.549	47	0.199	0.205	N	0.45	SignalP-noTM
EFX00854	0.132	22	0.137	22	0.215	8	0.143	0.14	N	0.45	SignalP-noTM
EFX00865	0.635	19	0.64	19	0.786	1	0.614	0.626	Y	0.45	SignalP-noTM
EFX00920	0.109	27	0.106	58	0.122	54	0.1	0.103	N	0.45	SignalP-noTM
EFX00934	0.11	29	0.108	29	0.159	7	0.103	0.105	N	0.45	SignalP-noTM
EFX00814	0.244	23	0.319	23	0.686	2	0.497	0.391	N	0.5	SignalP-TM
EFX00918	0.211	18	0.181	18	0.261	17	0.162	0.174	N	0.5	SignalP-TM
EFX00915	0.185	24	0.183	24	0.288	23	0.183	0.183	N	0.45	SignalP-noTM
EFX00766	0.115	21	0.115	21	0.133	13	0.116	0.115	N	0.45	SignalP-noTM
EFX00813	0.113	28	0.141	15	0.384	6	0.216	0.182	N	0.45	SignalP-noTM
EFX00903	0.117	42	0.117	11	0.153	1	0.109	0.113	N	0.45	SignalP-noTM
EFX00801	0.156	69	0.123	69	0.159	19	0.11	0.116	N	0.45	SignalP-noTM
EFX00874	0.117	21	0.117	18	0.137	26	0.113	0.115	N	0.45	SignalP-noTM
EFX00884	0.123	31	0.117	55	0.17	44	0.111	0.114	N	0.45	SignalP-noTM
EFX00792	0.129	16	0.109	16	0.109	56	0.092	0.1	N	0.45	SignalP-noTM
EFX00853	0.126	38	0.134	12	0.205	10	0.157	0.146	N	0.45	SignalP-noTM
EFX00871	0.125	8	0.106	52	0.121	34	0.094	0.1	N	0.45	SignalP-noTM
EFX00770	0.129	50	0.12	11	0.155	5	0.132	0.126	N	0.45	SignalP-noTM
EFX00784	0.321	47	0.157	20	0.338	19	0.191	0.17	N	0.5	SignalP-TM
EFX00902	0.166	36	0.127	36	0.115	35	0.093	0.109	N	0.45	SignalP-noTM
EFX00987	0.109	34	0.106	23	0.118	5	0.104	0.105	N	0.45	SignalP-noTM
EFX00944	0.109	42	0.108	42	0.127	2	0.103	0.106	N	0.45	SignalP-noTM
EFX00941	0.209	23	0.166	23	0.195	36	0.132	0.147	N	0.45	SignalP-noTM
EFX00807	0.11	18	0.12	12	0.154	1	0.114	0.117	N	0.45	SignalP-noTM
EFX00911	0.153	45	0.128	13	0.247	2	0.148	0.139	N	0.45	SignalP-noTM
EFX00912	0.124	18	0.116	18	0.141	17	0.11	0.113	N	0.45	SignalP-noTM
EFX00787	0.123	44	0.109	44	0.109	9	0.096	0.102	N	0.45	SignalP-noTM
EFX00756	0.112	40	0.109	11	0.122	2	0.107	0.108	N	0.45	SignalP-noTM
EFX00967	0.11	35	0.124	11	0.179	3	0.137	0.131	N	0.45	SignalP-noTM
EFX00913	0.168	44	0.139	44	0.128	33	0.11	0.123	N	0.45	SignalP-noTM
EFX00788	0.108	22	0.11	12	0.125	6	0.113	0.112	N	0.45	SignalP-noTM
EFX00925	0.135	23	0.118	23	0.114	11	0.102	0.109	N	0.45	SignalP-noTM
EFX00866	0.115	22	0.104	67	0.11	55	0.093	0.098	N	0.45	SignalP-noTM
EFX00796	0.12	22	0.126	22	0.188	3	0.131	0.128	N	0.45	SignalP-noTM
EFX00797	0.114	19	0.111	49	0.126	30	0.107	0.109	N	0.45	SignalP-noTM
EFX00852	0.112	22	0.107	12	0.113	1	0.101	0.104	N	0.45	SignalP-noTM
EFX00800	0.145	25	0.128	25	0.136	11	0.111	0.119	N	0.45	SignalP-noTM
EFX00826	0.139	55	0.12	55	0.125	13	0.102	0.11	N	0.45	SignalP-noTM
EFX00914	0.109	62	0.104	62	0.108	5	0.099	0.101	N	0.45	SignalP-noTM
EFX00844	0.11	48	0.12	13	0.181	12	0.136	0.129	N	0.45	SignalP-noTM
EFX00764	0.114	40	0.117	23	0.157	13	0.128	0.123	N	0.45	SignalP-noTM
EFX00962	0.11	45	0.107	69	0.115	50	0.096	0.101	N	0.45	SignalP-noTM
EFX00806	0.116	60	0.112	12	0.15	2	0.128	0.121	N	0.45	SignalP-noTM
EFX00981	0.405	26	0.42	26	0.625	16	0.427	0.424	N	0.45	SignalP-noTM
EFX00795	0.108	51	0.115	12	0.149	1	0.115	0.115	N	0.45	SignalP-noTM
EFX00773	0.112	63	0.107	63	0.133	25	0.099	0.103	N	0.45	SignalP-noTM
EFX00849	0.171	16	0.145	16	0.154	3	0.113	0.128	N	0.45	SignalP-noTM
EFX00808	0.109	34	0.119	12	0.156	2	0.126	0.123	N	0.45	SignalP-noTM
EFX00811	0.219	26	0.224	26	0.394	4	0.24	0.232	N	0.45	SignalP-noTM
EFX00893	0.173	32	0.213	12	0.564	6	0.452	0.309	N	0.5	SignalP-TM
EFX00758	0.111	52	0.109	52	0.117	1	0.099	0.103	N	0.45	SignalP-noTM
EFX00960	0.109	45	0.107	11	0.116	48	0.104	0.105	N	0.45	SignalP-noTM
EFX00895	0.113	58	0.106	58	0.117	55	0.099	0.102	N	0.45	SignalP-noTM
EFX00776	0.354	26	0.211	26	0.245	1	0.134	0.17	N	0.45	SignalP-noTM
EFX00923	0.164	42	0.129	42	0.137	47	0.101	0.114	N	0.45	SignalP-noTM
EFX00900	0.119	40	0.12	12	0.155	9	0.141	0.131	N	0.45	SignalP-noTM
EFX00822	0.11	59	0.111	12	0.128	3	0.108	0.109	N	0.45	SignalP-noTM
EFX00931	0.142	53	0.13	53	0.176	50	0.108	0.118	N	0.45	SignalP-noTM
EFX00951	0.111	70	0.106	70	0.119	11	0.099	0.102	N	0.45	SignalP-noTM
EFX00927	0.313	20	0.247	20	0.27	17	0.199	0.221	N	0.45	SignalP-noTM
EFX00829	0.634	48	0.379	48	0.418	44	0.145	0.286	N	0.5	SignalP-TM
EFX00804	0.109	39	0.104	61	0.112	2	0.098	0.101	N	0.45	SignalP-noTM
EFX00945	0.109	58	0.144	11	0.334	4	0.222	0.186	N	0.45	SignalP-noTM
EFX00956	0.114	42	0.116	18	0.155	41	0.123	0.12	N	0.45	SignalP-noTM
EFX00768	0.11	53	0.113	53	0.153	49	0.105	0.109	N	0.45	SignalP-noTM
EFX00890	0.53	18	0.687	18	0.939	10	0.879	0.791	Y	0.45	SignalP-noTM
EFX00875	0.117	22	0.138	22	0.252	16	0.164	0.152	N	0.45	SignalP-noTM
EFX00777	0.11	55	0.104	68	0.109	60	0.096	0.1	N	0.45	SignalP-noTM
EFX00897	0.11	61	0.105	61	0.112	1	0.097	0.101	N	0.45	SignalP-noTM
EFX00763	0.128	26	0.119	26	0.13	8	0.111	0.114	N	0.45	SignalP-noTM
EFX00882	0.125	61	0.114	61	0.121	53	0.096	0.104	N	0.45	SignalP-noTM
EFX00757	0.123	22	0.113	22	0.127	1	0.102	0.107	N	0.45	SignalP-noTM
EFX00845	0.12	16	0.134	16	0.185	1	0.132	0.133	N	0.45	SignalP-noTM
EFX00952	0.111	70	0.107	40	0.116	52	0.096	0.101	N	0.45	SignalP-noTM
EFX00929	0.109	41	0.11	41	0.123	7	0.106	0.108	N	0.45	SignalP-noTM
EFX00834	0.112	31	0.108	31	0.133	43	0.102	0.105	N	0.45	SignalP-noTM
EFX00886	0.337	19	0.282	19	0.291	1	0.224	0.25	N	0.45	SignalP-noTM
EFX05191	0.116	34	0.106	34	0.112	25	0.096	0.1	N	0.45	SignalP-noTM
EFX06711	0.11	70	0.107	70	0.117	66	0.097	0.102	N	0.45	SignalP-noTM
EFX06712	0.185	28	0.189	28	0.445	7	0.216	0.203	N	0.45	SignalP-noTM
EFX06708	0.19	30	0.151	30	0.206	3	0.131	0.14	N	0.45	SignalP-noTM
EFX06710	0.122	49	0.112	49	0.117	45	0.098	0.104	N	0.45	SignalP-noTM
EFX06709	0.307	29	0.329	29	0.713	3	0.4	0.367	N	0.45	SignalP-noTM
EFW99672	0.127	49	0.126	20	0.188	15	0.142	0.135	N	0.45	SignalP-noTM
EFX00032	0.146	18	0.213	17	0.41	12	0.308	0.251	N	0.5	SignalP-TM
EFX02570	0.113	28	0.106	28	0.123	27	0.099	0.102	N	0.45	SignalP-noTM
EFX02571	0.131	60	0.131	60	0.176	50	0.117	0.123	N	0.45	SignalP-noTM
EFX05192	0.13	48	0.106	38	0.132	59	0.093	0.101	N	0.5	SignalP-TM
EFX05195	0.11	68	0.106	46	0.119	24	0.098	0.102	N	0.45	SignalP-noTM
EFX05193	0.226	16	0.144	16	0.115	25	0.09	0.115	N	0.45	SignalP-noTM
EFX05194	0.11	25	0.117	11	0.177	1	0.122	0.119	N	0.5	SignalP-TM
EFX05196	0.141	33	0.211	21	0.484	17	0.349	0.266	N	0.5	SignalP-TM
EFW98961	0.155	30	0.133	12	0.199	3	0.15	0.142	N	0.45	SignalP-noTM
EFW98669	0.108	22	0.105	11	0.114	4	0.103	0.104	N	0.45	SignalP-noTM
EFW98548	0.107	70	0.11	54	0.127	35	0.102	0.106	N	0.45	SignalP-noTM
EFW98993	0.119	25	0.114	25	0.136	2	0.111	0.112	N	0.45	SignalP-noTM
EFW98969	0.115	16	0.124	16	0.195	11	0.13	0.127	N	0.45	SignalP-noTM
EFW98904	0.138	33	0.156	33	0.25	27	0.174	0.163	N	0.5	SignalP-TM
EFW98952	0.113	26	0.115	26	0.174	36	0.115	0.115	N	0.45	SignalP-noTM
EFW98833	0.174	20	0.142	20	0.142	1	0.112	0.126	N	0.45	SignalP-noTM
EFW98978	0.109	26	0.105	52	0.109	40	0.097	0.1	N	0.45	SignalP-noTM
EFW98743	0.113	19	0.107	63	0.129	52	0.101	0.104	N	0.45	SignalP-noTM
EFW98808	0.143	18	0.195	18	0.721	16	0.275	0.238	N	0.45	SignalP-noTM
EFW98756	0.113	34	0.108	26	0.13	8	0.106	0.107	N	0.45	SignalP-noTM
EFW98692	0.119	47	0.109	47	0.161	43	0.097	0.103	N	0.45	SignalP-noTM
EFW98864	0.14	25	0.124	11	0.216	4	0.151	0.135	N	0.5	SignalP-TM
EFW99015	0.243	69	0.218	69	0.327	13	0.159	0.194	N	0.5	SignalP-TM
EFW98985	0.176	25	0.164	25	0.261	3	0.153	0.158	N	0.45	SignalP-noTM
EFW98476	0.13	37	0.132	37	0.224	15	0.139	0.136	N	0.45	SignalP-noTM
EFW98610	0.141	25	0.174	12	0.326	3	0.289	0.22	N	0.5	SignalP-TM
EFW98488	0.123	56	0.114	56	0.131	6	0.108	0.111	N	0.45	SignalP-noTM
EFW99010	0.11	55	0.107	55	0.121	49	0.099	0.103	N	0.45	SignalP-noTM
EFW98573	0.147	34	0.141	34	0.22	4	0.149	0.145	N	0.45	SignalP-noTM
EFW98802	0.146	22	0.194	22	0.375	1	0.253	0.226	N	0.45	SignalP-noTM
EFW98777	0.113	47	0.109	47	0.121	27	0.1	0.104	N	0.45	SignalP-noTM
EFW98837	0.115	40	0.174	27	0.448	26	0.272	0.227	N	0.45	SignalP-noTM
EFW98483	0.112	38	0.106	38	0.112	52	0.097	0.101	N	0.45	SignalP-noTM
EFW98666	0.11	68	0.106	68	0.115	23	0.097	0.101	N	0.45	SignalP-noTM
EFW98446	0.108	46	0.119	15	0.15	2	0.128	0.124	N	0.45	SignalP-noTM
EFW98447	0.111	61	0.132	11	0.19	5	0.162	0.148	N	0.45	SignalP-noTM
EFW98466	0.15	18	0.12	18	0.109	20	0.095	0.106	N	0.45	SignalP-noTM
EFW98651	0.11	60	0.114	21	0.166	6	0.125	0.12	N	0.45	SignalP-noTM
EFW98700	0.132	34	0.118	34	0.162	28	0.101	0.109	N	0.45	SignalP-noTM
EFW98589	0.112	53	0.111	12	0.126	1	0.104	0.107	N	0.45	SignalP-noTM
EFW98609	0.11	56	0.11	19	0.153	11	0.115	0.113	N	0.45	SignalP-noTM
EFW98754	0.115	41	0.109	13	0.145	12	0.113	0.112	N	0.45	SignalP-noTM
EFW99011	0.11	52	0.111	31	0.155	39	0.106	0.108	N	0.45	SignalP-noTM
EFW98786	0.272	29	0.208	29	0.227	6	0.168	0.187	N	0.45	SignalP-noTM
EFW98979	0.136	28	0.159	28	0.305	9	0.184	0.172	N	0.45	SignalP-noTM
EFW98915	0.18	27	0.256	27	0.565	12	0.383	0.324	N	0.45	SignalP-noTM
EFW98492	0.109	57	0.104	12	0.147	2	0.097	0.1	N	0.45	SignalP-noTM
EFW98938	0.138	24	0.131	24	0.145	22	0.124	0.127	N	0.45	SignalP-noTM
EFW98693	0.108	33	0.108	70	0.117	57	0.105	0.106	N	0.45	SignalP-noTM
EFW98459	0.109	60	0.108	62	0.118	1	0.097	0.102	N	0.45	SignalP-noTM
EFW98776	0.144	17	0.181	17	0.307	1	0.199	0.191	N	0.45	SignalP-noTM
EFW98725	0.112	49	0.109	59	0.122	42	0.101	0.105	N	0.45	SignalP-noTM
EFW98902	0.107	9	0.105	41	0.112	29	0.097	0.1	N	0.45	SignalP-noTM
EFW98498	0.156	23	0.283	23	0.643	4	0.516	0.409	N	0.45	SignalP-noTM
EFW98836	0.111	52	0.109	11	0.128	3	0.111	0.11	N	0.45	SignalP-noTM
EFW98412	0.151	19	0.233	19	0.48	11	0.33	0.285	N	0.45	SignalP-noTM
EFW98923	0.118	69	0.19	25	0.46	24	0.319	0.26	N	0.45	SignalP-noTM
EFW98751	0.119	31	0.136	13	0.196	1	0.155	0.146	N	0.45	SignalP-noTM
EFW98974	0.12	67	0.114	44	0.14	20	0.115	0.114	N	0.45	SignalP-noTM
EFW98867	0.222	25	0.15	25	0.155	24	0.101	0.124	N	0.45	SignalP-noTM
EFW98805	0.115	48	0.109	22	0.134	13	0.111	0.11	N	0.45	SignalP-noTM
EFW98404	0.119	21	0.129	21	0.175	8	0.137	0.133	N	0.45	SignalP-noTM
EFW98855	0.362	51	0.315	51	0.595	46	0.176	0.24	N	0.45	SignalP-noTM
EFW98460	0.121	40	0.125	11	0.176	1	0.12	0.122	N	0.45	SignalP-noTM
EFW98956	0.178	35	0.195	16	0.38	4	0.307	0.256	N	0.45	SignalP-noTM
EFW99007	0.11	11	0.111	11	0.138	11	0.112	0.112	N	0.45	SignalP-noTM
EFW98578	0.112	37	0.107	37	0.12	23	0.099	0.102	N	0.45	SignalP-noTM
EFW98552	0.11	55	0.106	55	0.127	5	0.1	0.103	N	0.45	SignalP-noTM
EFW98557	0.116	45	0.108	45	0.116	15	0.098	0.102	N	0.45	SignalP-noTM
EFW98526	0.12	31	0.126	19	0.163	3	0.139	0.133	N	0.45	SignalP-noTM
EFW98520	0.118	54	0.104	16	0.125	5	0.104	0.104	N	0.5	SignalP-TM
EFW98470	0.272	22	0.196	22	0.19	1	0.139	0.165	N	0.45	SignalP-noTM
EFW99038	0.134	62	0.115	62	0.127	3	0.099	0.106	N	0.45	SignalP-noTM
EFW99013	0.115	17	0.111	28	0.125	22	0.111	0.111	N	0.45	SignalP-noTM
EFW98849	0.131	34	0.115	34	0.176	5	0.109	0.112	N	0.45	SignalP-noTM
EFW98732	0.112	21	0.108	38	0.127	22	0.102	0.105	N	0.45	SignalP-noTM
EFW99054	0.118	35	0.113	20	0.149	43	0.112	0.112	N	0.45	SignalP-noTM
EFW98876	0.255	18	0.31	18	0.544	3	0.364	0.339	N	0.45	SignalP-noTM
EFW98957	0.109	9	0.115	15	0.181	2	0.121	0.119	N	0.45	SignalP-noTM
EFW98799	0.158	19	0.129	19	0.136	13	0.107	0.117	N	0.45	SignalP-noTM
EFW98703	0.11	56	0.104	40	0.122	1	0.095	0.099	N	0.45	SignalP-noTM
EFW98451	0.146	33	0.154	33	0.289	29	0.16	0.157	N	0.45	SignalP-noTM
EFW98537	0.163	23	0.132	23	0.144	22	0.107	0.119	N	0.45	SignalP-noTM
EFW98419	0.146	45	0.17	11	0.366	1	0.204	0.189	N	0.45	SignalP-noTM
EFW98645	0.111	25	0.114	25	0.171	7	0.115	0.115	N	0.45	SignalP-noTM
EFW98660	0.108	68	0.115	11	0.135	1	0.11	0.112	N	0.45	SignalP-noTM
EFW98558	0.121	62	0.107	62	0.111	33	0.098	0.102	N	0.45	SignalP-noTM
EFW98886	0.13	29	0.137	29	0.256	3	0.155	0.147	N	0.45	SignalP-noTM
EFW98798	0.162	17	0.13	17	0.12	1	0.099	0.113	N	0.45	SignalP-noTM
EFW98891	0.11	55	0.114	11	0.147	4	0.12	0.118	N	0.45	SignalP-noTM
EFW98519	0.111	59	0.137	11	0.197	1	0.168	0.154	N	0.45	SignalP-noTM
EFW99027	0.149	21	0.173	21	0.262	7	0.201	0.189	N	0.45	SignalP-noTM
EFW99048	0.142	42	0.124	11	0.167	3	0.141	0.133	N	0.45	SignalP-noTM
EFW98941	0.197	17	0.153	17	0.179	13	0.119	0.135	N	0.45	SignalP-noTM
EFW98887	0.121	48	0.114	66	0.158	59	0.083	0.101	N	0.5	SignalP-TM
EFW98800	0.112	56	0.114	18	0.195	9	0.127	0.121	N	0.45	SignalP-noTM
EFW98440	0.12	9	0.109	12	0.129	2	0.105	0.107	N	0.45	SignalP-noTM
EFW98556	0.11	65	0.113	52	0.126	31	0.102	0.107	N	0.45	SignalP-noTM
EFW98656	0.111	67	0.113	21	0.154	5	0.121	0.117	N	0.45	SignalP-noTM
EFW98859	0.113	19	0.163	19	0.344	8	0.246	0.208	N	0.45	SignalP-noTM
EFW98715	0.787	21	0.837	21	0.948	4	0.886	0.863	Y	0.45	SignalP-noTM
EFW98823	0.111	68	0.109	39	0.126	17	0.101	0.105	N	0.45	SignalP-noTM
EFW98600	0.108	60	0.11	60	0.127	39	0.102	0.105	N	0.45	SignalP-noTM
EFW98875	0.113	30	0.149	11	0.251	1	0.181	0.166	N	0.45	SignalP-noTM
EFW98588	0.111	70	0.113	15	0.129	6	0.114	0.113	N	0.45	SignalP-noTM
EFW98489	0.155	32	0.143	32	0.282	4	0.153	0.148	N	0.45	SignalP-noTM
EFW98586	0.131	34	0.128	34	0.264	31	0.129	0.129	N	0.45	SignalP-noTM
EFW98507	0.222	17	0.284	17	0.727	1	0.405	0.332	N	0.5	SignalP-TM
EFW98445	0.181	41	0.135	11	0.224	2	0.14	0.138	N	0.45	SignalP-noTM
EFW98408	0.113	23	0.125	23	0.292	14	0.139	0.132	N	0.45	SignalP-noTM
EFW98514	0.127	55	0.108	68	0.13	3	0.09	0.101	N	0.5	SignalP-TM
EFW98670	0.135	29	0.15	11	0.253	7	0.215	0.185	N	0.45	SignalP-noTM
EFW99045	0.781	20	0.842	20	0.974	13	0.907	0.878	Y	0.45	SignalP-noTM
EFW98828	0.121	22	0.114	22	0.138	20	0.108	0.111	N	0.45	SignalP-noTM
EFW98862	0.571	24	0.707	24	0.969	12	0.878	0.799	Y	0.45	SignalP-noTM
EFW98539	0.663	21	0.774	21	0.952	13	0.899	0.841	Y	0.45	SignalP-noTM
EFW98615	0.442	26	0.625	26	0.952	19	0.884	0.765	Y	0.45	SignalP-noTM
EFW98720	0.131	63	0.119	63	0.137	61	0.107	0.112	N	0.45	SignalP-noTM
EFW98763	0.111	59	0.112	53	0.125	47	0.104	0.108	N	0.45	SignalP-noTM
EFW98486	0.111	34	0.111	12	0.12	13	0.108	0.11	N	0.45	SignalP-noTM
EFW98596	0.208	18	0.23	18	0.418	1	0.279	0.249	N	0.5	SignalP-TM
EFW98637	0.141	62	0.117	62	0.11	38	0.095	0.105	N	0.45	SignalP-noTM
EFW98690	0.112	29	0.112	12	0.143	3	0.12	0.116	N	0.45	SignalP-noTM
EFW98424	0.118	24	0.148	11	0.384	4	0.228	0.191	N	0.45	SignalP-noTM
EFW98706	0.128	24	0.123	24	0.137	4	0.119	0.121	N	0.45	SignalP-noTM
EFW98740	0.11	20	0.108	11	0.115	6	0.107	0.107	N	0.45	SignalP-noTM
EFW98899	0.767	22	0.664	22	0.753	4	0.571	0.614	Y	0.45	SignalP-noTM
EFW98815	0.165	23	0.159	23	0.263	5	0.154	0.156	N	0.45	SignalP-noTM
EFW98575	0.192	21	0.263	21	0.563	4	0.343	0.306	N	0.45	SignalP-noTM
EFW99043	0.117	19	0.134	19	0.179	12	0.15	0.143	N	0.45	SignalP-noTM
EFW98468	0.116	23	0.108	23	0.121	22	0.101	0.104	N	0.45	SignalP-noTM
EFW98709	0.128	38	0.116	38	0.189	13	0.11	0.113	N	0.45	SignalP-noTM
EFW98674	0.62	22	0.659	22	0.872	2	0.694	0.678	Y	0.45	SignalP-noTM
EFW98830	0.127	46	0.111	46	0.12	1	0.099	0.105	N	0.45	SignalP-noTM
EFW98736	0.148	36	0.132	24	0.196	20	0.151	0.14	N	0.5	SignalP-TM
EFW98604	0.111	40	0.109	42	0.114	32	0.102	0.105	N	0.45	SignalP-noTM
EFW98513	0.627	18	0.631	18	0.738	15	0.625	0.628	Y	0.45	SignalP-noTM
EFW98414	0.14	37	0.128	37	0.156	1	0.122	0.125	N	0.45	SignalP-noTM
EFW98839	0.165	21	0.128	21	0.116	34	0.099	0.112	N	0.45	SignalP-noTM
EFW98745	0.121	26	0.14	12	0.23	6	0.177	0.16	N	0.45	SignalP-noTM
EFW99021	0.126	17	0.111	42	0.134	7	0.106	0.109	N	0.45	SignalP-noTM
EFW98983	0.112	57	0.114	57	0.132	37	0.106	0.109	N	0.45	SignalP-noTM
EFW98999	0.126	32	0.111	32	0.117	40	0.096	0.102	N	0.45	SignalP-noTM
EFW98874	0.687	26	0.737	26	0.949	15	0.79	0.766	Y	0.45	SignalP-noTM
EFW98989	0.3	43	0.226	43	0.275	28	0.162	0.191	N	0.45	SignalP-noTM
EFW98570	0.156	24	0.173	24	0.282	4	0.195	0.185	N	0.45	SignalP-noTM
EFW98928	0.211	26	0.169	42	0.187	41	0.133	0.149	N	0.45	SignalP-noTM
EFW98813	0.144	24	0.129	24	0.147	1	0.118	0.123	N	0.45	SignalP-noTM
EFW98509	0.109	23	0.108	36	0.147	22	0.105	0.106	N	0.45	SignalP-noTM
EFW98504	0.254	18	0.28	18	0.545	5	0.328	0.299	N	0.5	SignalP-TM
EFW98432	0.145	46	0.122	46	0.137	25	0.103	0.112	N	0.45	SignalP-noTM
EFW98779	0.244	42	0.219	42	0.449	29	0.219	0.219	N	0.45	SignalP-noTM
EFW98566	0.111	68	0.119	11	0.157	1	0.122	0.121	N	0.45	SignalP-noTM
EFW98626	0.119	27	0.117	27	0.147	26	0.113	0.114	N	0.45	SignalP-noTM
EFW98866	0.119	26	0.139	13	0.229	1	0.151	0.145	N	0.45	SignalP-noTM
EFW98718	0.245	18	0.173	18	0.164	13	0.122	0.145	N	0.45	SignalP-noTM
EFW98680	0.11	53	0.108	13	0.117	1	0.105	0.106	N	0.45	SignalP-noTM
EFW98892	0.139	53	0.117	53	0.152	8	0.107	0.112	N	0.45	SignalP-noTM
EFW99016	0.148	34	0.128	34	0.133	26	0.107	0.117	N	0.45	SignalP-noTM
EFW98789	0.112	33	0.108	11	0.132	2	0.11	0.109	N	0.45	SignalP-noTM
EFW98713	0.111	33	0.112	24	0.138	23	0.115	0.114	N	0.45	SignalP-noTM
EFW98413	0.203	26	0.213	26	0.363	1	0.234	0.224	N	0.45	SignalP-noTM
EFW98790	0.128	23	0.13	23	0.159	13	0.131	0.131	N	0.45	SignalP-noTM
EFW98485	0.157	12	0.155	12	0.192	13	0.145	0.15	N	0.45	SignalP-noTM
EFW98835	0.117	70	0.109	46	0.117	38	0.095	0.102	N	0.45	SignalP-noTM
EFW98998	0.11	35	0.108	35	0.133	33	0.108	0.108	N	0.45	SignalP-noTM
EFW98712	0.106	37	0.108	54	0.167	67	0.101	0.105	N	0.5	SignalP-TM
EFW98807	0.114	20	0.116	20	0.142	7	0.119	0.118	N	0.45	SignalP-noTM
EFW98646	0.171	31	0.135	31	0.197	5	0.117	0.125	N	0.45	SignalP-noTM
EFW98734	0.169	23	0.257	23	0.609	12	0.437	0.329	N	0.5	SignalP-TM
EFW98496	0.11	65	0.12	56	0.173	49	0.115	0.117	N	0.45	SignalP-noTM
EFW98630	0.109	39	0.117	12	0.162	1	0.104	0.11	N	0.45	SignalP-noTM
EFW98838	0.112	27	0.106	12	0.115	31	0.101	0.103	N	0.45	SignalP-noTM
EFW98900	0.111	51	0.109	15	0.127	3	0.109	0.109	N	0.45	SignalP-noTM
EFW99002	0.11	23	0.131	11	0.232	4	0.152	0.142	N	0.45	SignalP-noTM
EFW99061	0.121	26	0.129	12	0.215	5	0.164	0.148	N	0.45	SignalP-noTM
EFW98462	0.109	59	0.106	12	0.114	29	0.101	0.103	N	0.45	SignalP-noTM
EFW98433	0.12	53	0.108	65	0.167	57	0.084	0.099	N	0.5	SignalP-TM
EFW98829	0.151	54	0.156	54	0.242	49	0.137	0.149	N	0.5	SignalP-TM
EFW98525	0.112	22	0.109	12	0.126	1	0.108	0.109	N	0.45	SignalP-noTM
EFW98737	0.165	35	0.131	35	0.147	5	0.107	0.118	N	0.45	SignalP-noTM
EFW98926	0.184	25	0.154	25	0.157	18	0.13	0.141	N	0.45	SignalP-noTM
EFW98699	0.304	20	0.24	20	0.258	18	0.187	0.212	N	0.45	SignalP-noTM
EFW98636	0.216	35	0.151	35	0.14	25	0.099	0.13	N	0.5	SignalP-TM
EFW98617	0.127	22	0.14	22	0.201	2	0.151	0.146	N	0.45	SignalP-noTM
EFW98475	0.111	50	0.108	50	0.12	52	0.101	0.104	N	0.45	SignalP-noTM
EFW98620	0.116	24	0.104	56	0.117	39	0.097	0.1	N	0.45	SignalP-noTM
EFW98523	0.115	37	0.161	17	0.419	6	0.241	0.193	N	0.5	SignalP-TM
EFW98465	0.113	24	0.114	12	0.136	1	0.113	0.114	N	0.45	SignalP-noTM
EFW99039	0.11	16	0.15	11	0.32	2	0.192	0.173	N	0.45	SignalP-noTM
EFW98931	0.362	20	0.495	20	0.794	1	0.657	0.582	Y	0.45	SignalP-noTM
EFW98522	0.11	68	0.109	68	0.116	57	0.101	0.105	N	0.45	SignalP-noTM
EFW98431	0.123	25	0.119	25	0.153	24	0.117	0.118	N	0.45	SignalP-noTM
EFW98701	0.121	38	0.204	12	0.515	1	0.269	0.239	N	0.45	SignalP-noTM
EFW98568	0.126	17	0.195	17	0.491	5	0.294	0.235	N	0.5	SignalP-TM
EFW98714	0.179	35	0.184	11	0.553	2	0.331	0.264	N	0.45	SignalP-noTM
EFW98856	0.117	18	0.107	44	0.12	28	0.095	0.101	N	0.45	SignalP-noTM
EFW98848	0.115	59	0.125	11	0.214	7	0.155	0.141	N	0.45	SignalP-noTM
EFW98841	0.239	26	0.362	26	0.718	25	0.57	0.445	N	0.5	SignalP-TM
EFW98747	0.108	25	0.127	11	0.199	1	0.118	0.122	N	0.45	SignalP-noTM
EFW99041	0.11	39	0.108	55	0.124	52	0.101	0.104	N	0.45	SignalP-noTM
EFW98987	0.679	36	0.43	36	0.516	3	0.333	0.391	N	0.5	SignalP-TM
EFW98872	0.129	16	0.114	16	0.118	28	0.095	0.104	N	0.45	SignalP-noTM
EFW98943	0.116	32	0.109	13	0.16	4	0.119	0.115	N	0.45	SignalP-noTM
EFW98935	0.151	30	0.141	12	0.263	3	0.187	0.166	N	0.45	SignalP-noTM
EFW99058	0.108	29	0.102	61	0.113	45	0.094	0.098	N	0.45	SignalP-noTM
EFW99053	0.121	58	0.142	58	0.377	41	0.141	0.142	N	0.45	SignalP-noTM
EFW98458	0.113	20	0.107	11	0.129	51	0.105	0.106	N	0.45	SignalP-noTM
EFW98491	0.11	62	0.123	11	0.167	2	0.128	0.126	N	0.45	SignalP-noTM
EFW98564	0.131	34	0.116	34	0.121	18	0.1	0.107	N	0.45	SignalP-noTM
EFW98860	0.111	56	0.109	62	0.118	55	0.102	0.106	N	0.45	SignalP-noTM
EFW98772	0.109	12	0.114	12	0.13	1	0.111	0.112	N	0.45	SignalP-noTM
EFW98530	0.314	40	0.172	40	0.128	39	0.093	0.129	N	0.45	SignalP-noTM
EFW98416	0.111	68	0.109	68	0.118	48	0.1	0.104	N	0.45	SignalP-noTM
EFW98614	0.686	18	0.674	18	0.756	1	0.636	0.654	Y	0.45	SignalP-noTM
EFW98951	0.111	65	0.108	13	0.135	1	0.097	0.102	N	0.45	SignalP-noTM
EFW98883	0.112	42	0.107	60	0.133	38	0.098	0.102	N	0.45	SignalP-noTM
EFW98676	0.232	54	0.182	54	0.223	41	0.144	0.161	N	0.45	SignalP-noTM
EFW98980	0.128	50	0.112	50	0.12	48	0.095	0.103	N	0.45	SignalP-noTM
EFW98587	0.146	28	0.174	28	0.292	23	0.204	0.19	N	0.45	SignalP-noTM
EFW98752	0.189	23	0.202	23	0.305	13	0.215	0.209	N	0.45	SignalP-noTM
EFW98661	0.132	23	0.131	12	0.187	1	0.137	0.134	N	0.45	SignalP-noTM
EFW98757	0.152	38	0.125	38	0.165	36	0.1	0.111	N	0.45	SignalP-noTM
EFW98533	0.178	30	0.132	30	0.147	3	0.104	0.117	N	0.45	SignalP-noTM
EFW98467	0.11	46	0.109	38	0.12	21	0.102	0.105	N	0.45	SignalP-noTM
EFW98598	0.108	38	0.108	24	0.123	7	0.108	0.108	N	0.45	SignalP-noTM
EFW98444	0.478	24	0.61	24	0.96	10	0.785	0.704	Y	0.45	SignalP-noTM
EFW98982	0.182	46	0.139	46	0.142	45	0.098	0.117	N	0.45	SignalP-noTM
EFW98729	0.188	67	0.111	24	0.117	70	0.091	0.103	N	0.5	SignalP-TM
EFW98618	0.108	28	0.111	28	0.124	10	0.113	0.112	N	0.45	SignalP-noTM
EFW98722	0.124	18	0.112	18	0.121	17	0.102	0.107	N	0.45	SignalP-noTM
EFW98881	0.126	42	0.115	42	0.131	14	0.108	0.111	N	0.45	SignalP-noTM
EFW98817	0.129	16	0.113	34	0.129	40	0.097	0.104	N	0.45	SignalP-noTM
EFW98791	0.143	23	0.115	23	0.118	22	0.092	0.102	N	0.45	SignalP-noTM
EFW98554	0.13	22	0.13	22	0.154	9	0.128	0.129	N	0.45	SignalP-noTM
EFW98642	0.115	59	0.107	59	0.124	2	0.098	0.102	N	0.45	SignalP-noTM
EFW98563	0.11	44	0.11	40	0.115	28	0.102	0.105	N	0.45	SignalP-noTM
EFW98659	0.158	48	0.111	29	0.135	27	0.112	0.111	N	0.5	SignalP-TM
EFW99000	0.315	25	0.229	25	0.308	32	0.162	0.193	N	0.45	SignalP-noTM
EFW98907	0.115	53	0.111	53	0.143	19	0.105	0.108	N	0.45	SignalP-noTM
EFW98438	0.11	47	0.108	13	0.124	32	0.102	0.105	N	0.45	SignalP-noTM
EFW98487	0.118	23	0.113	23	0.133	5	0.109	0.111	N	0.45	SignalP-noTM
EFW98812	0.145	18	0.176	18	0.36	5	0.203	0.191	N	0.45	SignalP-noTM
EFW98905	0.11	35	0.117	12	0.142	1	0.11	0.113	N	0.45	SignalP-noTM
EFW98708	0.112	63	0.108	63	0.128	9	0.099	0.103	N	0.45	SignalP-noTM
EFW98443	0.109	34	0.126	18	0.184	11	0.151	0.14	N	0.45	SignalP-noTM
EFW98726	0.109	41	0.129	11	0.234	2	0.171	0.152	N	0.45	SignalP-noTM
EFW98427	0.111	29	0.108	39	0.124	28	0.102	0.105	N	0.45	SignalP-noTM
EFW98711	0.111	55	0.119	13	0.195	9	0.13	0.125	N	0.45	SignalP-noTM
EFW98925	0.137	22	0.135	22	0.186	1	0.129	0.132	N	0.45	SignalP-noTM
EFW98810	0.108	16	0.11	44	0.124	29	0.105	0.107	N	0.45	SignalP-noTM
EFW98994	0.112	55	0.135	11	0.208	1	0.145	0.141	N	0.45	SignalP-noTM
EFW98597	0.259	17	0.165	17	0.131	43	0.102	0.131	N	0.45	SignalP-noTM
EFW98524	0.199	28	0.146	28	0.16	1	0.111	0.127	N	0.45	SignalP-noTM
EFW98806	0.109	12	0.111	12	0.119	1	0.106	0.108	N	0.45	SignalP-noTM
EFW98501	0.894	26	0.894	26	0.939	20	0.892	0.893	Y	0.45	SignalP-noTM
EFW98885	0.154	17	0.124	17	0.126	14	0.102	0.113	N	0.45	SignalP-noTM
EFW98415	0.157	44	0.148	25	0.231	23	0.159	0.152	N	0.5	SignalP-TM
EFW98403	0.144	21	0.163	21	0.258	15	0.182	0.173	N	0.45	SignalP-noTM
EFW98497	0.145	27	0.135	27	0.233	26	0.128	0.131	N	0.45	SignalP-noTM
EFW98950	0.129	29	0.124	12	0.183	2	0.136	0.13	N	0.45	SignalP-noTM
EFW98939	0.114	30	0.108	44	0.123	27	0.101	0.104	N	0.45	SignalP-noTM
EFW98873	0.143	33	0.196	11	0.58	4	0.411	0.312	N	0.45	SignalP-noTM
EFW98671	0.195	28	0.25	28	0.477	2	0.337	0.297	N	0.45	SignalP-noTM
EFW98832	0.11	44	0.108	70	0.124	50	0.101	0.104	N	0.45	SignalP-noTM
EFW98879	0.109	45	0.114	12	0.139	11	0.121	0.118	N	0.45	SignalP-noTM
EFW98771	0.119	23	0.163	41	0.297	27	0.198	0.177	N	0.5	SignalP-TM
EFW98766	0.195	24	0.195	24	0.281	13	0.195	0.195	N	0.45	SignalP-noTM
EFW98678	0.117	33	0.247	14	0.68	12	0.541	0.406	N	0.45	SignalP-noTM
EFW98581	0.144	42	0.123	42	0.171	28	0.104	0.113	N	0.45	SignalP-noTM
EFW98484	0.126	62	0.137	11	0.207	1	0.151	0.145	N	0.45	SignalP-noTM
EFW98503	0.109	39	0.109	39	0.127	21	0.098	0.103	N	0.45	SignalP-noTM
EFW99025	0.118	49	0.114	49	0.148	45	0.107	0.11	N	0.45	SignalP-noTM
EFW98948	0.11	16	0.102	65	0.107	5	0.093	0.097	N	0.45	SignalP-noTM
EFW98871	0.15	15	0.259	15	0.74	11	0.456	0.365	N	0.45	SignalP-noTM
EFW98977	0.112	7	0.106	44	0.123	43	0.102	0.104	N	0.45	SignalP-noTM
EFW98429	0.133	48	0.155	12	0.304	2	0.192	0.175	N	0.45	SignalP-noTM
EFW98877	0.204	41	0.193	41	0.273	12	0.175	0.183	N	0.45	SignalP-noTM
EFW98583	0.129	62	0.116	11	0.136	1	0.115	0.115	N	0.45	SignalP-noTM
EFW98508	0.118	50	0.119	50	0.194	49	0.106	0.112	N	0.45	SignalP-noTM
EFW98831	0.111	12	0.156	12	0.273	3	0.193	0.176	N	0.45	SignalP-noTM
EFW98602	0.108	29	0.104	37	0.112	23	0.101	0.102	N	0.45	SignalP-noTM
EFW98707	0.165	22	0.129	22	0.119	1	0.1	0.113	N	0.45	SignalP-noTM
EFW98803	0.12	35	0.121	18	0.193	9	0.135	0.128	N	0.45	SignalP-noTM
EFW98824	0.109	48	0.105	70	0.118	22	0.098	0.101	N	0.45	SignalP-noTM
EFW99055	0.186	45	0.14	45	0.157	12	0.106	0.122	N	0.45	SignalP-noTM
EFW98884	0.194	43	0.158	43	0.197	13	0.139	0.147	N	0.45	SignalP-noTM
EFW98652	0.115	66	0.107	66	0.119	9	0.096	0.101	N	0.45	SignalP-noTM
EFW98964	0.112	27	0.113	12	0.136	4	0.114	0.114	N	0.45	SignalP-noTM
EFW98698	0.345	39	0.333	39	0.551	16	0.321	0.326	N	0.45	SignalP-noTM
EFW98612	0.264	20	0.19	20	0.175	2	0.135	0.16	N	0.45	SignalP-noTM
EFW98972	0.339	20	0.503	20	0.846	15	0.739	0.631	Y	0.45	SignalP-noTM
EFW98406	0.575	19	0.701	19	0.901	8	0.845	0.779	Y	0.45	SignalP-noTM
EFW98917	0.689	18	0.795	18	0.958	8	0.905	0.854	Y	0.45	SignalP-noTM
EFW99014	0.11	29	0.107	29	0.114	24	0.102	0.104	N	0.45	SignalP-noTM
EFW98490	0.108	57	0.102	59	0.114	27	0.095	0.099	N	0.45	SignalP-noTM
EFW98555	0.113	24	0.128	11	0.183	4	0.143	0.136	N	0.45	SignalP-noTM
EFW98801	0.13	16	0.149	16	0.185	1	0.165	0.158	N	0.45	SignalP-noTM
EFW98644	0.112	34	0.125	11	0.215	11	0.138	0.132	N	0.45	SignalP-noTM
EFW98559	0.188	15	0.146	15	0.131	14	0.106	0.125	N	0.45	SignalP-noTM
EFW98705	0.118	13	0.115	18	0.136	10	0.116	0.115	N	0.45	SignalP-noTM
EFW98654	0.116	25	0.113	12	0.131	1	0.112	0.112	N	0.45	SignalP-noTM
EFW98511	0.142	20	0.124	20	0.19	59	0.106	0.116	N	0.5	SignalP-TM
EFW98411	0.14	28	0.127	28	0.164	31	0.114	0.12	N	0.45	SignalP-noTM
EFW98594	0.107	47	0.109	11	0.122	1	0.106	0.108	N	0.45	SignalP-noTM
EFW99018	0.141	25	0.205	25	0.587	4	0.305	0.259	N	0.45	SignalP-noTM
EFW98667	0.109	43	0.104	43	0.113	68	0.093	0.098	N	0.45	SignalP-noTM
EFW98426	0.14	34	0.149	34	0.275	33	0.166	0.158	N	0.45	SignalP-noTM
EFW98861	0.135	42	0.138	11	0.257	2	0.158	0.149	N	0.45	SignalP-noTM
EFW98908	0.119	30	0.137	12	0.23	1	0.15	0.144	N	0.45	SignalP-noTM
EFW99001	0.142	55	0.12	55	0.159	10	0.107	0.113	N	0.45	SignalP-noTM
EFW98662	0.126	27	0.119	27	0.159	24	0.113	0.116	N	0.45	SignalP-noTM
EFW99057	0.158	23	0.129	23	0.127	17	0.105	0.116	N	0.45	SignalP-noTM
EFW98735	0.109	38	0.106	38	0.115	28	0.101	0.103	N	0.45	SignalP-noTM
EFW98742	0.182	44	0.137	44	0.128	43	0.102	0.119	N	0.45	SignalP-noTM
EFW98882	0.127	25	0.115	25	0.138	2	0.106	0.11	N	0.45	SignalP-noTM
EFW98590	0.114	26	0.108	26	0.13	25	0.103	0.105	N	0.45	SignalP-noTM
EFW98844	0.127	55	0.131	11	0.193	1	0.125	0.128	N	0.45	SignalP-noTM
EFW98641	0.157	45	0.128	45	0.136	1	0.105	0.116	N	0.45	SignalP-noTM
EFW98933	0.112	46	0.111	37	0.13	28	0.107	0.109	N	0.45	SignalP-noTM
EFW99026	0.112	40	0.109	40	0.117	28	0.097	0.103	N	0.45	SignalP-noTM
EFW98627	0.148	25	0.137	25	0.206	2	0.132	0.134	N	0.45	SignalP-noTM
EFW98517	0.138	43	0.136	43	0.255	42	0.128	0.131	N	0.45	SignalP-noTM
EFW98405	0.712	28	0.303	28	0.203	2	0.136	0.212	N	0.45	SignalP-noTM
EFW98758	0.12	45	0.107	60	0.131	44	0.096	0.101	N	0.45	SignalP-noTM
EFW98469	0.218	33	0.216	33	0.316	13	0.221	0.218	N	0.45	SignalP-noTM
EFW98991	0.498	18	0.683	18	0.971	14	0.943	0.823	Y	0.45	SignalP-noTM
EFW98759	0.111	43	0.103	12	0.113	42	0.095	0.099	N	0.45	SignalP-noTM
EFW98474	0.115	21	0.218	21	0.663	5	0.416	0.325	N	0.45	SignalP-noTM
EFW98653	0.114	69	0.111	69	0.121	51	0.099	0.105	N	0.45	SignalP-noTM
EFW98623	0.112	65	0.107	53	0.119	46	0.101	0.104	N	0.45	SignalP-noTM
EFW98565	0.178	23	0.131	23	0.118	2	0.096	0.112	N	0.45	SignalP-noTM
EFW98819	0.158	56	0.126	69	0.191	57	0.096	0.114	N	0.5	SignalP-TM
EFW98811	0.148	52	0.152	52	0.457	49	0.124	0.137	N	0.45	SignalP-noTM
EFW99030	0.11	64	0.11	12	0.135	7	0.12	0.116	N	0.45	SignalP-noTM
EFW99019	0.154	44	0.119	11	0.168	2	0.133	0.125	N	0.5	SignalP-TM
EFW98695	0.108	67	0.104	67	0.116	22	0.101	0.102	N	0.45	SignalP-noTM
EFW98727	0.12	17	0.109	46	0.151	38	0.101	0.105	N	0.45	SignalP-noTM
EFW98622	0.11	27	0.106	27	0.113	14	0.101	0.103	N	0.45	SignalP-noTM
EFW98843	0.127	51	0.116	51	0.139	44	0.102	0.109	N	0.45	SignalP-noTM
EFW98851	0.159	21	0.155	21	0.21	1	0.16	0.157	N	0.5	SignalP-TM
EFW98580	0.156	50	0.127	50	0.161	3	0.11	0.117	N	0.45	SignalP-noTM
EFW99006	0.111	51	0.107	21	0.126	13	0.105	0.106	N	0.45	SignalP-noTM
EFW98739	0.115	21	0.111	21	0.146	13	0.108	0.109	N	0.45	SignalP-noTM
EFW98767	0.114	22	0.129	16	0.198	14	0.148	0.139	N	0.45	SignalP-noTM
EFW99005	0.321	17	0.224	17	0.277	28	0.152	0.185	N	0.45	SignalP-noTM
EFW98689	0.138	61	0.123	61	0.139	13	0.112	0.117	N	0.45	SignalP-noTM
EFW98679	0.15	49	0.127	49	0.138	18	0.108	0.117	N	0.45	SignalP-noTM
EFW98613	0.108	38	0.109	49	0.121	36	0.101	0.104	N	0.45	SignalP-noTM
EFW98730	0.111	27	0.111	13	0.13	1	0.111	0.111	N	0.45	SignalP-noTM
EFW98611	0.117	19	0.107	19	0.108	38	0.099	0.103	N	0.45	SignalP-noTM
EFW98528	0.156	35	0.167	35	0.328	33	0.168	0.167	N	0.45	SignalP-noTM
EFW98934	0.11	51	0.107	41	0.118	24	0.098	0.102	N	0.45	SignalP-noTM
EFW98441	0.122	27	0.13	27	0.242	5	0.143	0.137	N	0.45	SignalP-noTM
EFW98922	0.162	17	0.126	17	0.113	8	0.097	0.111	N	0.45	SignalP-noTM
EFW98954	0.115	16	0.124	16	0.166	14	0.131	0.128	N	0.45	SignalP-noTM
EFW98681	0.108	52	0.107	52	0.129	40	0.1	0.103	N	0.45	SignalP-noTM
EFW98605	0.111	47	0.111	19	0.124	28	0.107	0.109	N	0.45	SignalP-noTM
EFW98595	0.27	20	0.26	20	0.458	1	0.218	0.238	N	0.45	SignalP-noTM
EFW98901	0.111	68	0.11	58	0.129	40	0.105	0.107	N	0.45	SignalP-noTM
EFW98761	0.125	22	0.156	12	0.29	2	0.191	0.175	N	0.45	SignalP-noTM
EFW99044	0.108	51	0.104	35	0.113	29	0.097	0.1	N	0.45	SignalP-noTM
EFW98894	0.129	51	0.164	12	0.297	1	0.19	0.178	N	0.45	SignalP-noTM
EFW98518	0.11	47	0.107	31	0.127	12	0.104	0.106	N	0.45	SignalP-noTM
EFW98628	0.195	48	0.151	48	0.279	47	0.105	0.126	N	0.45	SignalP-noTM
EFW98960	0.112	29	0.109	55	0.145	45	0.104	0.106	N	0.45	SignalP-noTM
EFW98650	0.115	30	0.106	62	0.112	64	0.095	0.1	N	0.45	SignalP-noTM
EFW98949	0.182	25	0.23	20	0.499	2	0.346	0.293	N	0.45	SignalP-noTM
EFW98516	0.167	25	0.271	25	0.653	24	0.427	0.334	N	0.5	SignalP-TM
EFW98783	0.114	30	0.113	12	0.142	2	0.115	0.114	N	0.45	SignalP-noTM
EFW98499	0.19	58	0.098	23	0.128	68	0.09	0.095	N	0.5	SignalP-TM
EFW98774	0.113	44	0.122	12	0.19	20	0.14	0.132	N	0.45	SignalP-noTM
EFW99059	0.228	50	0.167	50	0.219	35	0.123	0.143	N	0.45	SignalP-noTM
EFW98655	0.2	22	0.254	22	0.493	20	0.322	0.291	N	0.45	SignalP-noTM
EFW98430	0.148	64	0.143	19	0.222	18	0.171	0.158	N	0.45	SignalP-noTM
EFW98418	0.12	41	0.149	12	0.244	1	0.167	0.159	N	0.45	SignalP-noTM
EFW98663	0.125	54	0.111	33	0.152	53	0.102	0.107	N	0.5	SignalP-TM
EFW98853	0.11	16	0.114	11	0.145	2	0.118	0.116	N	0.45	SignalP-noTM
EFW98971	0.136	27	0.127	27	0.18	4	0.123	0.125	N	0.45	SignalP-noTM
EFW98724	0.11	33	0.106	15	0.116	1	0.101	0.103	N	0.45	SignalP-noTM
EFW98909	0.127	44	0.134	12	0.307	46	0.138	0.136	N	0.45	SignalP-noTM
EFW98793	0.116	25	0.141	11	0.237	2	0.189	0.167	N	0.45	SignalP-noTM
EFW98686	0.111	70	0.114	12	0.135	1	0.106	0.11	N	0.45	SignalP-noTM
EFW98668	0.11	46	0.109	53	0.136	2	0.099	0.104	N	0.45	SignalP-noTM
EFW98577	0.119	22	0.107	41	0.125	19	0.099	0.103	N	0.45	SignalP-noTM
EFW99049	0.11	53	0.112	23	0.142	15	0.117	0.115	N	0.45	SignalP-noTM
EFW98973	0.24	44	0.412	44	0.868	30	0.548	0.485	Y	0.45	SignalP-noTM
EFW98402	0.112	38	0.106	38	0.114	56	0.099	0.102	N	0.45	SignalP-noTM
EFW98963	0.135	33	0.12	33	0.119	19	0.105	0.112	N	0.45	SignalP-noTM
EFW98579	0.116	18	0.11	52	0.119	43	0.099	0.104	N	0.45	SignalP-noTM
EFW98535	0.131	58	0.117	11	0.156	1	0.112	0.114	N	0.45	SignalP-noTM
EFW98731	0.203	26	0.208	26	0.347	8	0.21	0.209	N	0.45	SignalP-noTM
EFW98717	0.113	19	0.111	29	0.146	15	0.111	0.111	N	0.45	SignalP-noTM
EFW98820	0.123	9	0.14	11	0.21	1	0.162	0.152	N	0.45	SignalP-noTM
EFW98621	0.107	51	0.103	51	0.113	35	0.091	0.097	N	0.45	SignalP-noTM
EFW98505	0.11	40	0.107	40	0.118	34	0.096	0.101	N	0.45	SignalP-noTM
EFW98702	0.111	57	0.104	26	0.124	2	0.102	0.103	N	0.45	SignalP-noTM
EFW98704	0.109	41	0.104	32	0.115	23	0.099	0.101	N	0.45	SignalP-noTM
EFW98893	0.11	28	0.107	40	0.119	25	0.098	0.102	N	0.45	SignalP-noTM
EFW98442	0.119	34	0.151	22	0.321	12	0.215	0.186	N	0.45	SignalP-noTM
EFW99009	0.116	22	0.117	12	0.221	3	0.13	0.122	N	0.5	SignalP-TM
EFW98531	0.119	50	0.12	23	0.189	22	0.133	0.127	N	0.45	SignalP-noTM
EFW99031	0.204	28	0.319	28	0.704	13	0.514	0.424	N	0.45	SignalP-noTM
EFW98962	0.11	30	0.106	64	0.119	24	0.1	0.102	N	0.45	SignalP-noTM
EFW98953	0.162	30	0.133	30	0.182	29	0.107	0.119	N	0.45	SignalP-noTM
EFW99032	0.184	49	0.145	49	0.181	48	0.105	0.123	N	0.45	SignalP-noTM
EFW98918	0.108	22	0.105	65	0.114	22	0.101	0.103	N	0.45	SignalP-noTM
EFW98863	0.109	55	0.102	55	0.117	18	0.094	0.098	N	0.45	SignalP-noTM
EFW98782	0.151	30	0.129	30	0.135	16	0.111	0.119	N	0.45	SignalP-noTM
EFW98560	0.121	21	0.124	11	0.183	1	0.116	0.12	N	0.45	SignalP-noTM
EFW98677	0.11	57	0.106	33	0.119	12	0.102	0.104	N	0.45	SignalP-noTM
EFW98616	0.134	33	0.118	33	0.139	32	0.106	0.112	N	0.45	SignalP-noTM
EFW98629	0.111	67	0.105	12	0.122	1	0.094	0.099	N	0.45	SignalP-noTM
EFW98738	0.107	13	0.104	47	0.121	50	0.098	0.101	N	0.45	SignalP-noTM
EFW98543	0.112	30	0.117	30	0.196	12	0.122	0.12	N	0.45	SignalP-noTM
EFW99035	0.194	25	0.137	25	0.128	47	0.098	0.116	N	0.45	SignalP-noTM
EFW98795	0.163	18	0.22	18	0.4	3	0.29	0.258	N	0.45	SignalP-noTM
EFW98888	0.162	44	0.134	44	0.164	23	0.109	0.12	N	0.45	SignalP-noTM
EFW98457	0.141	36	0.126	36	0.152	34	0.113	0.119	N	0.45	SignalP-noTM
EFW98540	0.121	39	0.12	39	0.16	24	0.117	0.119	N	0.45	SignalP-noTM
EFW98603	0.272	35	0.183	35	0.181	34	0.12	0.149	N	0.45	SignalP-noTM
EFW98536	0.184	37	0.155	37	0.189	34	0.139	0.146	N	0.45	SignalP-noTM
EFW98510	0.115	14	0.118	14	0.135	4	0.119	0.119	N	0.45	SignalP-noTM
EFW98449	0.114	22	0.115	11	0.147	4	0.123	0.12	N	0.45	SignalP-noTM
EFW98682	0.208	27	0.165	27	0.189	6	0.14	0.155	N	0.5	SignalP-TM
EFW98529	0.117	53	0.143	53	0.247	46	0.119	0.133	N	0.5	SignalP-TM
EFW99008	0.11	55	0.108	16	0.122	8	0.107	0.107	N	0.45	SignalP-noTM
EFW98919	0.11	60	0.111	12	0.123	6	0.113	0.112	N	0.45	SignalP-noTM
EFW98921	0.11	68	0.109	14	0.129	1	0.096	0.102	N	0.45	SignalP-noTM
EFW98997	0.149	25	0.215	14	0.554	12	0.404	0.291	N	0.5	SignalP-TM
EFW98721	0.629	21	0.716	21	0.88	5	0.822	0.773	Y	0.45	SignalP-noTM
EFW98787	0.188	29	0.176	29	0.205	13	0.163	0.169	N	0.45	SignalP-noTM
EFW98825	0.305	18	0.473	18	0.85	10	0.752	0.624	Y	0.45	SignalP-noTM
EFW98959	0.121	26	0.105	70	0.144	67	0.092	0.1	N	0.5	SignalP-TM
EFW99047	0.109	39	0.106	39	0.113	28	0.095	0.1	N	0.45	SignalP-noTM
EFW98780	0.117	26	0.169	12	0.416	2	0.235	0.205	N	0.45	SignalP-noTM
EFW98450	0.129	31	0.138	29	0.203	11	0.149	0.144	N	0.45	SignalP-noTM
EFW98409	0.111	53	0.107	66	0.136	50	0.1	0.103	N	0.45	SignalP-noTM
EFW98495	0.128	48	0.132	11	0.209	2	0.159	0.147	N	0.45	SignalP-noTM
EFW98547	0.114	45	0.108	56	0.136	3	0.102	0.105	N	0.45	SignalP-noTM
EFW99062	0.133	28	0.141	18	0.194	14	0.144	0.142	N	0.45	SignalP-noTM
EFW98551	0.196	33	0.194	12	0.475	4	0.345	0.255	N	0.5	SignalP-TM
EFW98794	0.111	35	0.107	12	0.133	41	0.106	0.106	N	0.45	SignalP-noTM
EFW98854	0.213	49	0.171	49	0.226	3	0.148	0.158	N	0.45	SignalP-noTM
EFW98773	0.157	45	0.131	45	0.142	43	0.102	0.115	N	0.45	SignalP-noTM
EFW98924	0.148	17	0.161	17	0.207	15	0.174	0.168	N	0.45	SignalP-noTM
EFW99023	0.11	59	0.103	69	0.113	23	0.094	0.098	N	0.45	SignalP-noTM
EFW98995	0.112	27	0.13	12	0.192	1	0.138	0.134	N	0.45	SignalP-noTM
EFW98506	0.117	43	0.128	43	0.217	40	0.121	0.124	N	0.45	SignalP-noTM
EFW98631	0.125	20	0.106	47	0.115	43	0.096	0.101	N	0.45	SignalP-noTM
EFW98428	0.111	63	0.114	11	0.134	1	0.108	0.111	N	0.45	SignalP-noTM
EFW98544	0.17	33	0.138	33	0.16	5	0.12	0.128	N	0.45	SignalP-noTM
EFW98781	0.11	54	0.111	15	0.147	12	0.118	0.115	N	0.45	SignalP-noTM
EFW98697	0.267	53	0.318	23	0.63	5	0.469	0.378	N	0.5	SignalP-TM
EFW98685	0.218	19	0.293	19	0.512	16	0.384	0.342	N	0.45	SignalP-noTM
EFW98633	0.152	25	0.172	25	0.268	1	0.199	0.187	N	0.45	SignalP-noTM
EFW98868	0.363	19	0.556	19	0.914	14	0.851	0.715	Y	0.45	SignalP-noTM
EFW98822	0.152	59	0.151	59	0.292	49	0.116	0.132	N	0.45	SignalP-noTM
EFW98562	0.307	20	0.265	20	0.412	4	0.227	0.245	N	0.45	SignalP-noTM
EFW98760	0.358	18	0.357	18	0.476	1	0.321	0.338	N	0.45	SignalP-noTM
EFW98741	0.146	32	0.142	32	0.209	3	0.148	0.145	N	0.5	SignalP-TM
EFW98840	0.108	22	0.104	42	0.112	31	0.099	0.101	N	0.45	SignalP-noTM
EFW98694	0.11	26	0.109	40	0.138	34	0.102	0.105	N	0.45	SignalP-noTM
EFW98452	0.109	37	0.116	12	0.158	1	0.109	0.113	N	0.45	SignalP-noTM
EFW98417	0.107	23	0.108	37	0.12	22	0.103	0.105	N	0.45	SignalP-noTM
EFW98515	0.107	62	0.105	43	0.114	16	0.099	0.102	N	0.45	SignalP-noTM
EFW98592	0.118	45	0.143	45	0.319	41	0.152	0.148	N	0.45	SignalP-noTM
EFW98911	0.245	55	0.209	55	0.503	42	0.132	0.167	N	0.45	SignalP-noTM
EFW98688	0.11	55	0.117	11	0.15	2	0.122	0.12	N	0.45	SignalP-noTM
EFW99050	0.131	53	0.111	53	0.116	50	0.097	0.104	N	0.45	SignalP-noTM
EFW98448	0.286	31	0.293	31	0.438	29	0.267	0.283	N	0.5	SignalP-TM
EFW98869	0.11	47	0.104	12	0.113	2	0.102	0.103	N	0.45	SignalP-noTM
EFW98619	0.173	22	0.277	22	0.556	1	0.438	0.364	N	0.45	SignalP-noTM
EFW98723	0.135	24	0.123	24	0.149	13	0.112	0.117	N	0.45	SignalP-noTM
EFW98920	0.111	47	0.116	11	0.167	2	0.11	0.113	N	0.45	SignalP-noTM
EFW98976	0.126	20	0.192	20	0.413	19	0.277	0.238	N	0.45	SignalP-noTM
EFW98816	0.11	68	0.106	68	0.119	3	0.098	0.102	N	0.45	SignalP-noTM
EFW98865	0.782	25	0.836	25	0.976	14	0.898	0.869	Y	0.45	SignalP-noTM
EFW98946	0.179	24	0.183	24	0.418	2	0.191	0.188	N	0.45	SignalP-noTM
EFW98784	0.111	34	0.118	34	0.143	19	0.116	0.117	N	0.45	SignalP-noTM
EFW98421	0.461	23	0.588	23	0.873	21	0.75	0.675	Y	0.45	SignalP-noTM
EFW98880	0.108	58	0.108	11	0.127	1	0.099	0.103	N	0.45	SignalP-noTM
EFW98493	0.127	46	0.133	46	0.186	32	0.106	0.123	N	0.5	SignalP-TM
EFW98792	0.116	31	0.12	11	0.154	1	0.118	0.119	N	0.45	SignalP-noTM
EFW98647	0.116	39	0.108	11	0.127	12	0.108	0.108	N	0.45	SignalP-noTM
EFW98648	0.123	19	0.114	19	0.113	6	0.106	0.11	N	0.45	SignalP-noTM
EFW98567	0.116	44	0.116	14	0.15	13	0.124	0.121	N	0.45	SignalP-noTM
EFW98821	0.149	21	0.146	21	0.216	1	0.135	0.14	N	0.45	SignalP-noTM
EFW98719	0.131	47	0.114	47	0.137	44	0.101	0.107	N	0.45	SignalP-noTM
EFW98478	0.271	22	0.368	22	0.723	2	0.489	0.433	N	0.45	SignalP-noTM
EFW98988	0.15	31	0.13	11	0.192	1	0.123	0.126	N	0.45	SignalP-noTM
EFW98545	0.196	37	0.146	37	0.183	46	0.105	0.124	N	0.45	SignalP-noTM
EFW98553	0.302	20	0.497	20	0.863	2	0.813	0.668	Y	0.45	SignalP-noTM
EFW98910	0.113	30	0.105	63	0.119	55	0.096	0.1	N	0.45	SignalP-noTM
EFW98632	0.109	24	0.105	45	0.107	33	0.096	0.1	N	0.45	SignalP-noTM
EFW98889	0.111	61	0.109	18	0.134	14	0.113	0.111	N	0.45	SignalP-noTM
EFW98435	0.113	58	0.108	29	0.125	50	0.105	0.106	N	0.45	SignalP-noTM
EFW98480	0.111	30	0.106	30	0.123	24	0.099	0.102	N	0.45	SignalP-noTM
EFW98845	0.109	21	0.115	12	0.168	3	0.121	0.118	N	0.45	SignalP-noTM
EFW99042	0.11	28	0.12	12	0.174	26	0.128	0.124	N	0.45	SignalP-noTM
EFW98764	0.111	26	0.117	11	0.149	1	0.114	0.116	N	0.45	SignalP-noTM
EFW98534	0.168	21	0.239	21	0.511	12	0.331	0.289	N	0.45	SignalP-noTM
EFW98809	0.245	60	0.161	60	0.161	13	0.11	0.133	N	0.45	SignalP-noTM
EFW99056	0.167	22	0.211	22	0.466	1	0.257	0.236	N	0.45	SignalP-noTM
EFW98673	0.134	16	0.156	16	0.249	12	0.192	0.176	N	0.45	SignalP-noTM
EFW98601	0.122	38	0.118	24	0.19	14	0.125	0.122	N	0.45	SignalP-noTM
EFW98658	0.124	28	0.115	28	0.129	21	0.106	0.11	N	0.45	SignalP-noTM
EFW98635	0.324	22	0.482	22	0.841	11	0.674	0.559	Y	0.5	SignalP-TM
EFW98454	0.251	36	0.166	36	0.198	1	0.115	0.138	N	0.45	SignalP-noTM
EFW98770	0.111	14	0.137	11	0.226	5	0.163	0.151	N	0.45	SignalP-noTM
EFW98687	0.123	53	0.116	23	0.14	13	0.113	0.114	N	0.45	SignalP-noTM
EFW99046	0.109	47	0.138	43	0.224	39	0.129	0.134	N	0.5	SignalP-TM
EFW99028	0.109	57	0.112	57	0.129	39	0.102	0.106	N	0.45	SignalP-noTM
EFW98401	0.118	28	0.137	11	0.201	1	0.15	0.144	N	0.45	SignalP-noTM
EFW98955	0.123	29	0.137	11	0.204	1	0.132	0.135	N	0.45	SignalP-noTM
EFW98546	0.119	27	0.108	27	0.122	28	0.098	0.103	N	0.45	SignalP-noTM
EFW98750	0.108	39	0.108	39	0.141	51	0.098	0.104	N	0.5	SignalP-TM
EFW98846	0.113	49	0.112	11	0.163	28	0.114	0.113	N	0.45	SignalP-noTM
EFW98788	0.112	65	0.117	17	0.157	10	0.133	0.126	N	0.45	SignalP-noTM
EFW98593	0.238	35	0.248	20	0.692	19	0.401	0.33	N	0.45	SignalP-noTM
EFW98942	0.11	30	0.122	11	0.176	4	0.14	0.131	N	0.45	SignalP-noTM
EFW98640	0.119	47	0.128	47	0.214	30	0.137	0.133	N	0.45	SignalP-noTM
EFW98572	0.145	70	0.137	52	0.236	44	0.134	0.136	N	0.45	SignalP-noTM
EFW99022	0.114	67	0.107	12	0.117	4	0.101	0.103	N	0.45	SignalP-noTM
EFW98958	0.11	65	0.11	14	0.13	3	0.108	0.109	N	0.45	SignalP-noTM
EFW98541	0.137	26	0.131	26	0.156	24	0.124	0.127	N	0.45	SignalP-noTM
EFW98728	0.157	23	0.13	23	0.157	61	0.1	0.118	N	0.5	SignalP-TM
EFW98482	0.119	55	0.121	55	0.186	47	0.108	0.114	N	0.45	SignalP-noTM
EFW98574	0.11	38	0.108	43	0.12	37	0.099	0.104	N	0.45	SignalP-noTM
EFW98927	0.176	20	0.138	20	0.133	9	0.109	0.122	N	0.45	SignalP-noTM
EFW99012	0.133	21	0.128	21	0.197	32	0.123	0.125	N	0.45	SignalP-noTM
EFW98625	0.462	22	0.339	22	0.567	1	0.317	0.33	N	0.5	SignalP-TM
EFW98639	0.111	50	0.116	25	0.194	13	0.123	0.12	N	0.45	SignalP-noTM
EFW98716	0.112	40	0.111	11	0.136	6	0.114	0.113	N	0.45	SignalP-noTM
EFW98665	0.108	37	0.108	53	0.115	42	0.1	0.104	N	0.45	SignalP-noTM
EFW98903	0.283	26	0.179	26	0.142	25	0.115	0.144	N	0.45	SignalP-noTM
EFW98407	0.108	43	0.106	56	0.136	39	0.101	0.103	N	0.45	SignalP-noTM
EFW98500	0.11	8	0.108	36	0.125	28	0.102	0.105	N	0.45	SignalP-noTM
EFW98778	0.117	18	0.112	63	0.15	50	0.106	0.109	N	0.45	SignalP-noTM
EFW99033	0.11	53	0.112	13	0.139	2	0.114	0.113	N	0.45	SignalP-noTM
EFW98479	0.139	23	0.126	23	0.134	10	0.114	0.12	N	0.45	SignalP-noTM
EFW98940	0.169	16	0.177	16	0.275	15	0.18	0.179	N	0.45	SignalP-noTM
EFW98481	0.235	41	0.167	41	0.195	38	0.118	0.141	N	0.45	SignalP-noTM
EFW98895	0.155	34	0.193	11	0.449	1	0.259	0.229	N	0.45	SignalP-noTM
EFW98929	0.112	49	0.107	49	0.112	64	0.094	0.1	N	0.45	SignalP-noTM
EFW98512	0.141	36	0.13	36	0.189	38	0.128	0.129	N	0.45	SignalP-noTM
EFW98423	0.842	26	0.887	26	0.99	14	0.936	0.913	Y	0.45	SignalP-noTM
EFW98852	0.118	17	0.142	12	0.214	1	0.161	0.153	N	0.45	SignalP-noTM
EFW98755	0.151	24	0.133	24	0.141	14	0.118	0.125	N	0.45	SignalP-noTM
EFW98797	0.112	68	0.11	11	0.123	1	0.107	0.108	N	0.45	SignalP-noTM
EFW98842	0.111	48	0.104	62	0.11	26	0.097	0.1	N	0.45	SignalP-noTM
EFW98453	0.189	32	0.134	32	0.134	45	0.095	0.113	N	0.45	SignalP-noTM
EFW98439	0.117	52	0.123	11	0.158	1	0.121	0.122	N	0.45	SignalP-noTM
EFW98624	0.109	70	0.107	22	0.13	11	0.106	0.106	N	0.45	SignalP-noTM
EFW98966	0.151	26	0.126	26	0.183	2	0.112	0.119	N	0.45	SignalP-noTM
EFW98847	0.128	37	0.108	37	0.111	61	0.09	0.098	N	0.45	SignalP-noTM
EFW98748	0.111	70	0.111	11	0.126	2	0.113	0.112	N	0.45	SignalP-noTM
EFW98591	0.388	52	0.221	52	0.284	48	0.107	0.16	N	0.45	SignalP-noTM
EFW98664	0.112	51	0.104	25	0.126	38	0.103	0.104	N	0.45	SignalP-noTM
EFW98576	0.11	55	0.107	30	0.12	22	0.099	0.103	N	0.45	SignalP-noTM
EFW98455	0.11	42	0.106	65	0.112	17	0.099	0.102	N	0.45	SignalP-noTM
EFW99040	0.109	30	0.119	11	0.165	4	0.125	0.122	N	0.45	SignalP-noTM
EFW99060	0.128	23	0.22	18	0.496	1	0.359	0.295	N	0.45	SignalP-noTM
EFW98502	0.155	36	0.19	12	0.394	1	0.28	0.239	N	0.45	SignalP-noTM
EFW98996	0.109	45	0.121	13	0.171	1	0.113	0.117	N	0.45	SignalP-noTM
EFW98410	0.111	60	0.107	60	0.137	49	0.103	0.105	N	0.45	SignalP-noTM
EFW98638	0.108	11	0.11	11	0.115	1	0.106	0.108	N	0.45	SignalP-noTM
EFW98913	0.126	21	0.121	21	0.13	14	0.116	0.118	N	0.45	SignalP-noTM
EFW98912	0.113	59	0.108	45	0.12	34	0.1	0.104	N	0.45	SignalP-noTM
EFW98657	0.173	22	0.245	19	0.546	1	0.322	0.287	N	0.45	SignalP-noTM
EFW98571	0.205	20	0.202	20	0.249	15	0.2	0.201	N	0.45	SignalP-noTM
EFW98463	0.127	59	0.147	59	0.282	49	0.136	0.141	N	0.45	SignalP-noTM
EFW98850	0.11	16	0.106	16	0.144	35	0.102	0.104	N	0.45	SignalP-noTM
EFW98785	0.128	35	0.143	19	0.225	6	0.182	0.159	N	0.5	SignalP-TM
EFW98826	0.113	31	0.119	31	0.159	29	0.122	0.12	N	0.45	SignalP-noTM
EFW98897	0.228	31	0.204	11	0.539	2	0.385	0.277	N	0.5	SignalP-TM
EFW98683	0.125	19	0.109	19	0.12	31	0.096	0.102	N	0.45	SignalP-noTM
EFW98649	0.172	36	0.133	36	0.142	9	0.106	0.119	N	0.45	SignalP-noTM
EFW98733	0.132	21	0.141	11	0.228	1	0.141	0.141	N	0.45	SignalP-noTM
EFW98981	0.17	25	0.162	25	0.203	5	0.155	0.158	N	0.45	SignalP-noTM
EFW99052	0.188	48	0.112	34	0.157	31	0.107	0.11	N	0.5	SignalP-TM
EFW98464	0.111	24	0.11	24	0.136	22	0.109	0.11	N	0.45	SignalP-noTM
EFW98906	0.119	37	0.114	11	0.138	5	0.12	0.117	N	0.45	SignalP-noTM
EFW98527	0.167	33	0.155	33	0.269	32	0.15	0.152	N	0.45	SignalP-noTM
EFW98461	0.116	51	0.108	51	0.124	47	0.097	0.102	N	0.45	SignalP-noTM
EFW98584	0.112	54	0.108	11	0.124	25	0.105	0.106	N	0.45	SignalP-noTM
EFW99017	0.128	26	0.108	26	0.122	25	0.091	0.099	N	0.45	SignalP-noTM
EFW98550	0.579	21	0.729	21	0.974	11	0.915	0.83	Y	0.45	SignalP-noTM
EFW98936	0.188	17	0.177	17	0.245	15	0.176	0.176	N	0.45	SignalP-noTM
EFW98746	0.11	54	0.111	49	0.126	43	0.103	0.107	N	0.45	SignalP-noTM
EFW98930	0.111	54	0.104	43	0.112	14	0.098	0.101	N	0.45	SignalP-noTM
EFW98607	0.133	21	0.115	21	0.114	5	0.1	0.107	N	0.45	SignalP-noTM
EFW98561	0.113	27	0.105	27	0.111	26	0.098	0.101	N	0.45	SignalP-noTM
EFW98937	0.184	32	0.2	11	0.648	5	0.43	0.324	N	0.45	SignalP-noTM
EFW98870	0.542	20	0.699	20	0.933	14	0.899	0.807	Y	0.45	SignalP-noTM
EFW98473	0.11	56	0.142	11	0.216	1	0.16	0.152	N	0.45	SignalP-noTM
EFW98796	0.108	66	0.106	32	0.125	13	0.105	0.106	N	0.45	SignalP-noTM
EFW99024	0.135	47	0.126	47	0.179	40	0.117	0.121	N	0.45	SignalP-noTM
EFW98437	0.11	46	0.11	11	0.153	5	0.117	0.114	N	0.45	SignalP-noTM
EFW98804	0.148	19	0.166	19	0.232	2	0.179	0.173	N	0.45	SignalP-noTM
EFW98710	0.168	64	0.13	64	0.176	14	0.107	0.118	N	0.45	SignalP-noTM
EFW98521	0.112	70	0.107	70	0.122	2	0.097	0.102	N	0.45	SignalP-noTM
EFW98532	0.109	40	0.12	11	0.191	2	0.132	0.126	N	0.45	SignalP-noTM
EFW99036	0.123	33	0.121	47	0.208	29	0.12	0.12	N	0.45	SignalP-noTM
EFW98775	0.186	59	0.184	59	0.267	48	0.12	0.159	N	0.5	SignalP-TM
EFW98538	0.112	64	0.116	70	0.166	56	0.097	0.108	N	0.5	SignalP-TM
EFW99037	0.128	27	0.146	11	0.236	1	0.164	0.156	N	0.45	SignalP-noTM
EFW98569	0.13	60	0.12	60	0.122	54	0.108	0.113	N	0.45	SignalP-noTM
EFW98947	0.149	31	0.133	31	0.153	11	0.123	0.128	N	0.45	SignalP-noTM
EFW99004	0.115	31	0.12	11	0.151	1	0.13	0.125	N	0.45	SignalP-noTM
EFW98643	0.108	70	0.109	11	0.128	1	0.102	0.106	N	0.45	SignalP-noTM
EFW98691	0.109	53	0.127	12	0.195	1	0.126	0.126	N	0.45	SignalP-noTM
EFW98896	0.121	65	0.107	39	0.127	38	0.102	0.105	N	0.5	SignalP-TM
EFW98818	0.145	23	0.148	23	0.226	9	0.151	0.149	N	0.45	SignalP-noTM
EFW98608	0.386	32	0.222	32	0.299	39	0.121	0.167	N	0.45	SignalP-noTM
EFW98857	0.11	35	0.113	41	0.134	31	0.107	0.11	N	0.45	SignalP-noTM
EFW98422	0.146	19	0.119	19	0.115	25	0.099	0.108	N	0.45	SignalP-noTM
EFW98945	0.494	23	0.458	23	0.549	22	0.403	0.436	N	0.5	SignalP-TM
EFW99029	0.114	28	0.129	13	0.192	1	0.131	0.13	N	0.45	SignalP-noTM
EFW98744	0.356	24	0.27	24	0.319	15	0.203	0.234	N	0.45	SignalP-noTM
EFW98990	0.108	11	0.105	40	0.113	20	0.098	0.101	N	0.45	SignalP-noTM
EFW98675	0.147	36	0.119	36	0.132	5	0.102	0.11	N	0.45	SignalP-noTM
EFW98762	0.156	27	0.178	20	0.358	1	0.223	0.203	N	0.45	SignalP-noTM
EFW98890	0.142	33	0.119	33	0.138	1	0.1	0.109	N	0.45	SignalP-noTM
EFW98914	0.16	43	0.13	43	0.193	41	0.11	0.12	N	0.45	SignalP-noTM
EFW98878	0.126	31	0.125	11	0.197	4	0.147	0.137	N	0.45	SignalP-noTM
EFW98944	0.11	58	0.11	63	0.143	45	0.102	0.106	N	0.45	SignalP-noTM
EFW98684	0.332	23	0.377	23	0.665	1	0.466	0.412	N	0.5	SignalP-TM
EFW98472	0.333	18	0.472	18	0.789	13	0.684	0.586	Y	0.45	SignalP-noTM
EFW98434	0.115	34	0.196	13	0.417	7	0.352	0.258	N	0.5	SignalP-TM
EFW98425	0.125	23	0.118	11	0.16	1	0.111	0.114	N	0.45	SignalP-noTM
EFW98494	0.128	51	0.159	33	0.363	31	0.191	0.172	N	0.5	SignalP-TM
EFW98599	0.175	22	0.22	22	0.431	13	0.3	0.252	N	0.5	SignalP-TM
EFW98634	0.112	52	0.111	62	0.129	54	0.102	0.106	N	0.45	SignalP-noTM
EFW98585	0.135	35	0.122	35	0.203	38	0.112	0.117	N	0.45	SignalP-noTM
EFW98827	0.172	26	0.215	11	0.593	3	0.397	0.288	N	0.5	SignalP-TM
EFW98696	0.182	17	0.154	17	0.167	50	0.119	0.135	N	0.45	SignalP-noTM
EFW98753	0.126	40	0.114	40	0.129	14	0.103	0.108	N	0.45	SignalP-noTM
EFW98932	0.118	17	0.123	17	0.151	5	0.125	0.124	N	0.45	SignalP-noTM
EFW99051	0.11	41	0.11	48	0.119	28	0.102	0.106	N	0.45	SignalP-noTM
EFW98471	0.109	28	0.109	28	0.12	12	0.107	0.108	N	0.45	SignalP-noTM
EFW99003	0.152	21	0.125	21	0.127	19	0.104	0.114	N	0.45	SignalP-noTM
EFW98400	0.746	23	0.822	23	0.968	13	0.906	0.867	Y	0.45	SignalP-noTM
EFW98765	0.123	41	0.11	41	0.124	38	0.097	0.103	N	0.45	SignalP-noTM
EFW98542	0.112	66	0.116	11	0.141	2	0.123	0.12	N	0.45	SignalP-noTM
EFW98582	0.111	60	0.11	55	0.131	47	0.103	0.106	N	0.45	SignalP-noTM
EFW98769	0.136	16	0.135	16	0.155	13	0.131	0.133	N	0.45	SignalP-noTM
EFW99034	0.241	49	0.174	49	0.198	45	0.113	0.141	N	0.45	SignalP-noTM
EFW98967	0.126	34	0.151	11	0.25	1	0.201	0.178	N	0.45	SignalP-noTM
EFW98858	0.19	60	0.189	60	0.436	46	0.131	0.158	N	0.45	SignalP-noTM
EFW98477	0.111	28	0.104	28	0.11	8	0.095	0.099	N	0.45	SignalP-noTM
EFW98549	0.136	42	0.119	42	0.13	12	0.104	0.111	N	0.45	SignalP-noTM
EFW98968	0.18	33	0.135	33	0.173	48	0.1	0.116	N	0.45	SignalP-noTM
EFW98986	0.11	7	0.11	25	0.131	14	0.112	0.111	N	0.45	SignalP-noTM
EFW98916	0.11	34	0.108	16	0.124	12	0.107	0.107	N	0.45	SignalP-noTM
EFW98970	0.109	16	0.186	16	0.422	15	0.284	0.239	N	0.45	SignalP-noTM
EFW98672	0.126	24	0.133	24	0.185	2	0.141	0.137	N	0.45	SignalP-noTM
EFW98436	0.136	33	0.169	16	0.329	1	0.246	0.211	N	0.45	SignalP-noTM
EFW99020	0.117	26	0.108	26	0.113	2	0.101	0.104	N	0.45	SignalP-noTM
EFW98749	0.128	43	0.117	43	0.163	12	0.109	0.112	N	0.45	SignalP-noTM
EFW98984	0.135	23	0.12	23	0.131	4	0.108	0.113	N	0.45	SignalP-noTM
EFW98606	0.121	40	0.113	40	0.114	38	0.101	0.107	N	0.45	SignalP-noTM
EFW98768	0.184	23	0.2	23	0.358	1	0.217	0.209	N	0.45	SignalP-noTM
EFW98975	0.138	43	0.121	43	0.165	38	0.104	0.112	N	0.45	SignalP-noTM
EFW98965	0.242	29	0.156	11	0.258	7	0.227	0.184	N	0.5	SignalP-TM
EFW98834	0.109	28	0.106	39	0.116	21	0.098	0.102	N	0.45	SignalP-noTM
EFW98898	0.118	67	0.108	42	0.125	23	0.101	0.104	N	0.45	SignalP-noTM
EFW98992	0.111	22	0.104	39	0.108	16	0.098	0.101	N	0.45	SignalP-noTM
EFW98420	0.111	43	0.107	43	0.113	1	0.098	0.102	N	0.45	SignalP-noTM
EFW98814	0.132	34	0.122	34	0.194	31	0.108	0.114	N	0.45	SignalP-noTM
EFW98456	0.12	23	0.118	11	0.161	3	0.126	0.122	N	0.45	SignalP-noTM
EFW99390	0.157	12	0.135	12	0.174	3	0.123	0.129	N	0.45	SignalP-noTM
EFX00264	0.149	38	0.171	11	0.355	2	0.222	0.199	N	0.45	SignalP-noTM
EFX00087	0.133	32	0.129	32	0.145	5	0.125	0.127	N	0.45	SignalP-noTM
EFX00519	0.132	32	0.112	32	0.122	36	0.096	0.103	N	0.45	SignalP-noTM
EFX00697	0.127	39	0.141	39	0.328	31	0.157	0.15	N	0.45	SignalP-noTM
EFX00411	0.125	36	0.121	27	0.177	9	0.127	0.124	N	0.45	SignalP-noTM
EFX00344	0.11	32	0.112	12	0.131	7	0.112	0.112	N	0.45	SignalP-noTM
EFX00054	0.517	25	0.465	25	0.684	21	0.425	0.443	N	0.45	SignalP-noTM
EFX00467	0.316	25	0.181	25	0.172	1	0.108	0.142	N	0.45	SignalP-noTM
EFX00204	0.109	64	0.11	19	0.151	10	0.116	0.113	N	0.45	SignalP-noTM
EFX00547	0.145	17	0.15	17	0.271	14	0.16	0.156	N	0.45	SignalP-noTM
EFX00458	0.109	21	0.108	21	0.126	5	0.108	0.108	N	0.45	SignalP-noTM
EFX00227	0.11	58	0.106	58	0.117	54	0.1	0.103	N	0.45	SignalP-noTM
EFX00577	0.118	28	0.106	28	0.112	47	0.096	0.1	N	0.45	SignalP-noTM
EFX00365	0.485	20	0.672	20	0.976	14	0.938	0.816	Y	0.45	SignalP-noTM
EFX00042	0.204	38	0.162	38	0.207	31	0.12	0.139	N	0.45	SignalP-noTM
EFX00286	0.123	28	0.136	12	0.209	5	0.152	0.145	N	0.45	SignalP-noTM
EFX00443	0.11	28	0.108	11	0.124	1	0.103	0.105	N	0.45	SignalP-noTM
EFX00243	0.116	27	0.177	12	0.369	1	0.214	0.197	N	0.45	SignalP-noTM
EFX00121	0.109	44	0.111	16	0.14	10	0.118	0.115	N	0.45	SignalP-noTM
EFX00150	0.11	45	0.112	12	0.129	1	0.103	0.107	N	0.45	SignalP-noTM
EFX00258	0.189	28	0.172	28	0.292	2	0.169	0.17	N	0.45	SignalP-noTM
EFX00180	0.169	32	0.137	32	0.155	1	0.114	0.125	N	0.45	SignalP-noTM
EFX00590	0.129	37	0.133	51	0.271	48	0.121	0.127	N	0.45	SignalP-noTM
EFX00635	0.111	32	0.107	12	0.122	30	0.108	0.108	N	0.45	SignalP-noTM
EFX00665	0.139	21	0.138	21	0.189	7	0.134	0.136	N	0.45	SignalP-noTM
EFX00708	0.113	38	0.12	12	0.186	4	0.135	0.128	N	0.45	SignalP-noTM
EFX00388	0.113	45	0.106	16	0.13	4	0.109	0.108	N	0.45	SignalP-noTM
EFX00105	0.109	70	0.108	12	0.119	3	0.109	0.109	N	0.45	SignalP-noTM
EFX00581	0.11	18	0.111	44	0.121	23	0.103	0.106	N	0.45	SignalP-noTM
EFX00199	0.119	44	0.105	44	0.105	70	0.095	0.1	N	0.45	SignalP-noTM
EFX00671	0.118	32	0.136	16	0.203	13	0.158	0.148	N	0.45	SignalP-noTM
EFX00598	0.11	50	0.113	58	0.159	43	0.104	0.108	N	0.45	SignalP-noTM
EFX00075	0.128	22	0.133	22	0.189	13	0.138	0.136	N	0.45	SignalP-noTM
EFX00735	0.108	30	0.112	54	0.143	6	0.109	0.111	N	0.5	SignalP-TM
EFX00478	0.128	35	0.119	35	0.139	40	0.11	0.114	N	0.45	SignalP-noTM
EFX00167	0.11	60	0.128	12	0.176	1	0.15	0.14	N	0.45	SignalP-noTM
EFX00570	0.117	12	0.116	12	0.142	11	0.122	0.119	N	0.45	SignalP-noTM
EFX00452	0.112	44	0.113	13	0.129	1	0.118	0.116	N	0.45	SignalP-noTM
EFX00493	0.111	34	0.11	24	0.127	8	0.113	0.112	N	0.45	SignalP-noTM
EFX00647	0.143	17	0.149	17	0.202	3	0.154	0.152	N	0.45	SignalP-noTM
EFX00711	0.389	20	0.203	20	0.131	19	0.105	0.15	N	0.45	SignalP-noTM
EFX00193	0.163	29	0.212	29	0.45	28	0.286	0.252	N	0.45	SignalP-noTM
EFX00660	0.112	65	0.123	65	0.229	48	0.116	0.12	N	0.45	SignalP-noTM
EFX00283	0.109	27	0.105	27	0.111	18	0.099	0.101	N	0.45	SignalP-noTM
EFX00057	0.118	21	0.112	21	0.138	13	0.107	0.109	N	0.45	SignalP-noTM
EFX00107	0.11	16	0.111	12	0.126	1	0.106	0.108	N	0.45	SignalP-noTM
EFX00688	0.148	67	0.123	67	0.134	5	0.11	0.116	N	0.45	SignalP-noTM
EFX00213	0.111	47	0.118	12	0.149	6	0.126	0.122	N	0.45	SignalP-noTM
EFX00615	0.118	35	0.109	47	0.132	33	0.096	0.102	N	0.45	SignalP-noTM
EFX00263	0.119	56	0.117	70	0.164	61	0.085	0.104	N	0.5	SignalP-TM
EFX00310	0.12	46	0.117	11	0.143	2	0.118	0.118	N	0.45	SignalP-noTM
EFX00412	0.111	33	0.11	19	0.159	12	0.113	0.112	N	0.45	SignalP-noTM
EFX00450	0.204	21	0.152	21	0.191	19	0.108	0.134	N	0.5	SignalP-TM
EFX00249	0.187	40	0.171	40	0.264	19	0.155	0.165	N	0.5	SignalP-TM
EFX00330	0.111	47	0.112	11	0.156	2	0.116	0.114	N	0.45	SignalP-noTM
EFX00236	0.857	19	0.887	19	0.951	3	0.909	0.899	Y	0.45	SignalP-noTM
EFX00074	0.143	39	0.119	39	0.19	12	0.113	0.116	N	0.45	SignalP-noTM
EFX00145	0.12	60	0.121	60	0.162	44	0.112	0.116	N	0.45	SignalP-noTM
EFX00050	0.134	31	0.118	31	0.139	3	0.109	0.113	N	0.45	SignalP-noTM
EFX00130	0.17	30	0.166	30	0.356	23	0.185	0.177	N	0.45	SignalP-noTM
EFX00629	0.111	37	0.11	37	0.121	31	0.102	0.105	N	0.45	SignalP-noTM
EFX00242	0.127	22	0.143	22	0.241	3	0.162	0.153	N	0.45	SignalP-noTM
EFX00640	0.186	56	0.135	56	0.121	54	0.098	0.115	N	0.45	SignalP-noTM
EFX00474	0.109	11	0.103	63	0.11	57	0.096	0.1	N	0.45	SignalP-noTM
EFX00572	0.11	29	0.111	12	0.134	1	0.108	0.109	N	0.45	SignalP-noTM
EFX00618	0.22	50	0.228	50	0.377	19	0.214	0.222	N	0.5	SignalP-TM
EFX00696	0.109	42	0.108	14	0.119	1	0.106	0.107	N	0.45	SignalP-noTM
EFX00416	0.109	45	0.109	45	0.127	44	0.101	0.105	N	0.45	SignalP-noTM
EFX00276	0.111	15	0.112	15	0.123	35	0.11	0.111	N	0.45	SignalP-noTM
EFX00409	0.112	25	0.102	66	0.104	60	0.092	0.097	N	0.45	SignalP-noTM
EFX00188	0.123	34	0.146	12	0.228	1	0.178	0.163	N	0.45	SignalP-noTM
EFX00490	0.142	36	0.136	36	0.186	14	0.136	0.136	N	0.45	SignalP-noTM
EFX00533	0.157	30	0.126	30	0.131	36	0.105	0.115	N	0.45	SignalP-noTM
EFX00341	0.332	17	0.516	17	0.858	7	0.786	0.662	Y	0.45	SignalP-noTM
EFX00428	0.13	25	0.13	25	0.181	19	0.129	0.129	N	0.45	SignalP-noTM
EFX00255	0.132	19	0.129	19	0.146	5	0.126	0.127	N	0.45	SignalP-noTM
EFX00191	0.11	12	0.119	12	0.197	5	0.14	0.13	N	0.45	SignalP-noTM
EFX00251	0.129	23	0.28	14	0.678	1	0.564	0.433	N	0.45	SignalP-noTM
EFX00092	0.133	47	0.126	12	0.167	1	0.132	0.129	N	0.45	SignalP-noTM
EFX00319	0.114	22	0.109	41	0.126	32	0.102	0.105	N	0.45	SignalP-noTM
EFX00439	0.129	21	0.116	21	0.122	42	0.104	0.109	N	0.45	SignalP-noTM
EFX00544	0.134	16	0.175	16	0.304	10	0.235	0.207	N	0.45	SignalP-noTM
EFX00730	0.147	19	0.223	19	0.573	1	0.286	0.257	N	0.45	SignalP-noTM
EFX00109	0.146	69	0.124	17	0.165	13	0.14	0.132	N	0.45	SignalP-noTM
EFX00566	0.593	20	0.717	20	0.936	13	0.869	0.799	Y	0.45	SignalP-noTM
EFX00641	0.11	62	0.107	62	0.13	3	0.098	0.102	N	0.45	SignalP-noTM
EFX00345	0.11	64	0.107	16	0.118	12	0.107	0.107	N	0.45	SignalP-noTM
EFX00181	0.251	26	0.216	26	0.523	24	0.182	0.198	N	0.45	SignalP-noTM
EFX00514	0.109	13	0.114	13	0.135	2	0.119	0.117	N	0.45	SignalP-noTM
EFX00094	0.108	51	0.104	33	0.115	67	0.093	0.099	N	0.5	SignalP-TM
EFX00673	0.185	23	0.196	23	0.292	3	0.209	0.203	N	0.45	SignalP-noTM
EFX00595	0.162	22	0.158	22	0.221	2	0.152	0.154	N	0.45	SignalP-noTM
EFX00206	0.286	27	0.219	27	0.287	2	0.181	0.199	N	0.45	SignalP-noTM
EFX00645	0.534	20	0.709	20	0.977	11	0.937	0.832	Y	0.45	SignalP-noTM
EFX00132	0.11	20	0.109	36	0.141	25	0.107	0.108	N	0.45	SignalP-noTM
EFX00185	0.162	56	0.128	56	0.15	8	0.104	0.115	N	0.45	SignalP-noTM
EFX00267	0.249	21	0.236	21	0.37	1	0.208	0.221	N	0.45	SignalP-noTM
EFX00633	0.11	27	0.111	33	0.137	23	0.106	0.109	N	0.45	SignalP-noTM
EFX00069	0.117	44	0.128	18	0.2	14	0.15	0.14	N	0.45	SignalP-noTM
EFX00701	0.13	45	0.175	11	0.543	6	0.341	0.264	N	0.45	SignalP-noTM
EFX00574	0.114	20	0.109	51	0.127	49	0.095	0.102	N	0.45	SignalP-noTM
EFX00104	0.174	32	0.272	32	0.786	28	0.428	0.356	N	0.45	SignalP-noTM
EFX00582	0.182	20	0.296	20	0.609	9	0.487	0.399	N	0.45	SignalP-noTM
EFX00225	0.108	50	0.105	59	0.119	45	0.097	0.1	N	0.45	SignalP-noTM
EFX00209	0.157	24	0.156	24	0.221	9	0.154	0.155	N	0.45	SignalP-noTM
EFX00361	0.11	53	0.115	27	0.171	7	0.123	0.118	N	0.5	SignalP-TM
EFX00119	0.111	43	0.108	43	0.119	27	0.097	0.102	N	0.45	SignalP-noTM
EFX00222	0.109	40	0.122	11	0.158	2	0.131	0.127	N	0.45	SignalP-noTM
EFX00278	0.109	17	0.108	46	0.121	32	0.097	0.102	N	0.45	SignalP-noTM
EFX00748	0.11	51	0.103	70	0.111	57	0.095	0.099	N	0.45	SignalP-noTM
EFX00277	0.117	47	0.113	63	0.183	46	0.107	0.11	N	0.45	SignalP-noTM
EFX00335	0.112	27	0.104	27	0.112	3	0.099	0.102	N	0.45	SignalP-noTM
EFX00642	0.116	16	0.11	16	0.11	14	0.101	0.105	N	0.45	SignalP-noTM
EFX00558	0.109	48	0.101	67	0.108	56	0.092	0.096	N	0.45	SignalP-noTM
EFX00430	0.112	36	0.105	64	0.112	22	0.096	0.1	N	0.45	SignalP-noTM
EFX00421	0.159	35	0.122	35	0.13	1	0.099	0.11	N	0.45	SignalP-noTM
EFX00403	0.142	20	0.115	20	0.115	1	0.089	0.101	N	0.45	SignalP-noTM
EFX00323	0.119	62	0.12	62	0.186	45	0.106	0.112	N	0.45	SignalP-noTM
EFX00506	0.195	27	0.154	27	0.165	1	0.126	0.139	N	0.45	SignalP-noTM
EFX00234	0.118	23	0.116	23	0.134	31	0.113	0.114	N	0.45	SignalP-noTM
EFX00704	0.153	19	0.119	19	0.11	35	0.091	0.104	N	0.45	SignalP-noTM
EFX00099	0.11	66	0.109	15	0.122	50	0.103	0.106	N	0.45	SignalP-noTM
EFX00597	0.408	33	0.207	33	0.19	1	0.115	0.157	N	0.45	SignalP-noTM
EFX00118	0.264	23	0.288	23	0.635	15	0.313	0.301	N	0.45	SignalP-noTM
EFX00714	0.112	66	0.104	66	0.108	45	0.094	0.099	N	0.45	SignalP-noTM
EFX00507	0.177	36	0.206	18	0.409	8	0.33	0.255	N	0.5	SignalP-TM
EFX00600	0.121	23	0.109	11	0.123	1	0.102	0.105	N	0.45	SignalP-noTM
EFX00218	0.166	22	0.157	22	0.26	1	0.143	0.149	N	0.45	SignalP-noTM
EFX00516	0.161	23	0.139	23	0.244	2	0.121	0.129	N	0.45	SignalP-noTM
EFX00579	0.16	46	0.145	46	0.22	10	0.147	0.146	N	0.45	SignalP-noTM
EFX00720	0.23	20	0.267	20	0.379	2	0.319	0.287	N	0.5	SignalP-TM
EFX00669	0.109	19	0.107	19	0.131	11	0.1	0.104	N	0.5	SignalP-TM
EFX00187	0.149	38	0.125	38	0.168	35	0.102	0.112	N	0.45	SignalP-noTM
EFX00046	0.111	12	0.109	12	0.113	1	0.102	0.105	N	0.45	SignalP-noTM
EFX00372	0.11	38	0.111	17	0.137	3	0.113	0.112	N	0.45	SignalP-noTM
EFX00272	0.112	64	0.108	11	0.134	3	0.106	0.107	N	0.45	SignalP-noTM
EFX00170	0.112	46	0.107	46	0.114	44	0.098	0.102	N	0.45	SignalP-noTM
EFX00390	0.116	29	0.119	45	0.191	36	0.114	0.117	N	0.45	SignalP-noTM
EFX00499	0.24	20	0.181	20	0.267	32	0.135	0.156	N	0.45	SignalP-noTM
EFX00527	0.111	24	0.107	49	0.122	44	0.102	0.104	N	0.45	SignalP-noTM
EFX00444	0.11	15	0.111	48	0.125	35	0.104	0.107	N	0.45	SignalP-noTM
EFX00404	0.112	53	0.112	53	0.132	46	0.104	0.108	N	0.45	SignalP-noTM
EFX00294	0.126	18	0.113	18	0.117	17	0.097	0.104	N	0.45	SignalP-noTM
EFX00588	0.125	31	0.109	31	0.137	42	0.096	0.102	N	0.45	SignalP-noTM
EFX00511	0.127	19	0.13	12	0.2	1	0.131	0.131	N	0.45	SignalP-noTM
EFX00524	0.111	29	0.133	14	0.196	10	0.165	0.15	N	0.45	SignalP-noTM
EFX00237	0.115	50	0.119	12	0.166	7	0.127	0.123	N	0.45	SignalP-noTM
EFX00250	0.343	16	0.567	16	0.963	11	0.946	0.771	Y	0.45	SignalP-noTM
EFX00468	0.108	23	0.105	68	0.118	23	0.099	0.102	N	0.45	SignalP-noTM
EFX00532	0.725	21	0.787	21	0.933	5	0.855	0.824	Y	0.45	SignalP-noTM
EFX00441	0.184	26	0.208	26	0.435	7	0.234	0.222	N	0.45	SignalP-noTM
EFX00693	0.438	26	0.44	26	0.714	9	0.452	0.446	N	0.45	SignalP-noTM
EFX00623	0.131	53	0.148	21	0.244	8	0.187	0.169	N	0.45	SignalP-noTM
EFX00710	0.114	67	0.116	12	0.148	2	0.127	0.122	N	0.45	SignalP-noTM
EFX00280	0.14	50	0.116	50	0.13	49	0.094	0.104	N	0.45	SignalP-noTM
EFX00585	0.159	56	0.128	56	0.166	11	0.11	0.118	N	0.45	SignalP-noTM
EFX00538	0.11	64	0.11	64	0.118	49	0.104	0.107	N	0.45	SignalP-noTM
EFX00285	0.117	64	0.11	25	0.141	1	0.11	0.11	N	0.5	SignalP-TM
EFX00366	0.109	36	0.108	36	0.157	28	0.102	0.105	N	0.45	SignalP-noTM
EFX00682	0.141	24	0.147	24	0.224	4	0.155	0.151	N	0.45	SignalP-noTM
EFX00274	0.145	25	0.243	20	0.664	14	0.449	0.354	N	0.45	SignalP-noTM
EFX00103	0.158	19	0.194	19	0.29	14	0.231	0.214	N	0.45	SignalP-noTM
EFX00694	0.15	19	0.124	19	0.11	1	0.101	0.112	N	0.45	SignalP-noTM
EFX00530	0.108	45	0.109	17	0.162	13	0.118	0.114	N	0.45	SignalP-noTM
EFX00357	0.221	34	0.149	34	0.21	5	0.122	0.138	N	0.5	SignalP-TM
EFX00399	0.115	38	0.134	22	0.206	16	0.158	0.143	N	0.5	SignalP-TM
EFX00462	0.684	21	0.786	21	0.964	12	0.902	0.849	Y	0.45	SignalP-noTM
EFX00536	0.122	27	0.112	27	0.144	40	0.104	0.107	N	0.45	SignalP-noTM
EFX00699	0.165	19	0.148	19	0.164	4	0.134	0.14	N	0.45	SignalP-noTM
EFX00260	0.224	31	0.208	11	0.514	6	0.418	0.292	N	0.5	SignalP-TM
EFX00320	0.143	29	0.216	12	0.589	1	0.413	0.295	N	0.5	SignalP-TM
EFX00134	0.163	35	0.135	35	0.149	5	0.116	0.125	N	0.45	SignalP-noTM
EFX00609	0.272	27	0.26	27	0.34	24	0.231	0.248	N	0.5	SignalP-TM
EFX00252	0.114	51	0.11	51	0.135	45	0.099	0.104	N	0.45	SignalP-noTM
EFX00355	0.147	39	0.121	39	0.125	9	0.105	0.113	N	0.45	SignalP-noTM
EFX00162	0.112	34	0.125	11	0.167	1	0.115	0.12	N	0.45	SignalP-noTM
EFX00192	0.123	17	0.114	17	0.162	4	0.11	0.112	N	0.45	SignalP-noTM
EFX00096	0.124	25	0.11	50	0.154	46	0.1	0.105	N	0.45	SignalP-noTM
EFX00408	0.702	22	0.787	22	0.947	8	0.881	0.838	Y	0.45	SignalP-noTM
EFX00534	0.765	25	0.855	25	0.985	6	0.954	0.908	Y	0.45	SignalP-noTM
EFX00353	0.141	48	0.162	48	0.3	45	0.169	0.165	N	0.5	SignalP-TM
EFX00651	0.157	23	0.194	23	0.415	4	0.24	0.219	N	0.45	SignalP-noTM
EFX00316	0.111	39	0.12	12	0.156	4	0.137	0.129	N	0.45	SignalP-noTM
EFX00554	0.379	25	0.589	25	0.984	12	0.918	0.767	Y	0.45	SignalP-noTM
EFX00703	0.115	70	0.119	70	0.188	66	0.097	0.11	N	0.5	SignalP-TM
EFX00297	0.125	18	0.128	18	0.175	16	0.13	0.129	N	0.45	SignalP-noTM
EFX00540	0.109	66	0.107	56	0.117	50	0.101	0.104	N	0.45	SignalP-noTM
EFX00062	0.129	31	0.12	17	0.134	14	0.116	0.118	N	0.45	SignalP-noTM
EFX00212	0.111	37	0.112	13	0.133	2	0.114	0.113	N	0.45	SignalP-noTM
EFX00601	0.723	23	0.835	23	0.992	15	0.964	0.905	Y	0.45	SignalP-noTM
EFX00398	0.15	19	0.125	19	0.141	2	0.098	0.11	N	0.45	SignalP-noTM
EFX00422	0.11	54	0.11	62	0.141	50	0.101	0.105	N	0.45	SignalP-noTM
EFX00384	0.112	45	0.107	45	0.11	33	0.1	0.103	N	0.45	SignalP-noTM
EFX00553	0.241	49	0.187	49	0.208	45	0.124	0.153	N	0.45	SignalP-noTM
EFX00338	0.177	49	0.17	25	0.308	18	0.202	0.183	N	0.5	SignalP-TM
EFX00295	0.117	22	0.107	55	0.12	53	0.1	0.103	N	0.45	SignalP-noTM
EFX00282	0.161	25	0.137	25	0.175	1	0.12	0.128	N	0.45	SignalP-noTM
EFX00086	0.169	29	0.144	29	0.172	3	0.13	0.138	N	0.5	SignalP-TM
EFX00063	0.774	29	0.643	29	0.9	3	0.602	0.621	Y	0.45	SignalP-noTM
EFX00200	0.117	54	0.14	11	0.219	1	0.151	0.146	N	0.45	SignalP-noTM
EFX00744	0.178	39	0.126	39	0.11	56	0.088	0.111	N	0.5	SignalP-TM
EFX00471	0.34	18	0.214	18	0.198	15	0.135	0.171	N	0.45	SignalP-noTM
EFX00190	0.196	32	0.162	32	0.484	31	0.125	0.142	N	0.45	SignalP-noTM
EFX00290	0.122	48	0.114	12	0.14	8	0.121	0.118	N	0.45	SignalP-noTM
EFX00377	0.149	43	0.133	25	0.17	41	0.13	0.131	N	0.45	SignalP-noTM
EFX00636	0.109	36	0.107	36	0.118	23	0.103	0.105	N	0.45	SignalP-noTM
EFX00680	0.214	32	0.198	32	0.253	6	0.193	0.196	N	0.5	SignalP-TM
EFX00363	0.121	32	0.117	53	0.15	38	0.115	0.116	N	0.45	SignalP-noTM
EFX00456	0.112	57	0.106	13	0.14	16	0.099	0.102	N	0.45	SignalP-noTM
EFX00616	0.108	39	0.108	39	0.127	20	0.104	0.105	N	0.45	SignalP-noTM
EFX00152	0.149	38	0.126	38	0.158	3	0.114	0.119	N	0.45	SignalP-noTM
EFX00168	0.112	29	0.105	44	0.119	42	0.099	0.102	N	0.45	SignalP-noTM
EFX00247	0.109	67	0.105	36	0.111	22	0.099	0.102	N	0.45	SignalP-noTM
EFX00729	0.113	23	0.125	11	0.172	2	0.127	0.126	N	0.45	SignalP-noTM
EFX00114	0.536	20	0.693	20	0.935	4	0.895	0.802	Y	0.45	SignalP-noTM
EFX00275	0.108	54	0.108	12	0.123	24	0.107	0.107	N	0.45	SignalP-noTM
EFX00364	0.112	68	0.119	11	0.207	2	0.128	0.124	N	0.45	SignalP-noTM
EFX00513	0.217	16	0.343	16	0.6	1	0.517	0.437	N	0.45	SignalP-noTM
EFX00291	0.113	27	0.106	13	0.124	1	0.094	0.099	N	0.45	SignalP-noTM
EFX00033	0.111	70	0.107	40	0.115	31	0.103	0.105	N	0.45	SignalP-noTM
EFX00488	0.13	40	0.12	40	0.174	22	0.107	0.113	N	0.45	SignalP-noTM
EFX00088	0.133	22	0.172	22	0.325	19	0.22	0.198	N	0.45	SignalP-noTM
EFX00418	0.118	58	0.108	11	0.163	3	0.114	0.111	N	0.45	SignalP-noTM
EFX00664	0.157	33	0.169	33	0.465	29	0.188	0.179	N	0.45	SignalP-noTM
EFX00453	0.119	23	0.177	11	0.383	1	0.221	0.201	N	0.45	SignalP-noTM
EFX00307	0.14	29	0.122	29	0.161	5	0.112	0.117	N	0.45	SignalP-noTM
EFX00176	0.109	52	0.109	34	0.119	14	0.105	0.107	N	0.45	SignalP-noTM
EFX00217	0.116	28	0.116	11	0.144	27	0.116	0.116	N	0.45	SignalP-noTM
EFX00445	0.125	28	0.109	64	0.15	48	0.101	0.105	N	0.45	SignalP-noTM
EFX00288	0.116	38	0.107	38	0.118	34	0.096	0.101	N	0.45	SignalP-noTM
EFX00342	0.173	39	0.201	39	0.522	35	0.214	0.208	N	0.45	SignalP-noTM
EFX00059	0.141	44	0.213	30	0.525	7	0.393	0.31	N	0.45	SignalP-noTM
EFX00650	0.116	9	0.12	21	0.166	3	0.124	0.123	N	0.45	SignalP-noTM
EFX00567	0.326	25	0.192	25	0.361	1	0.159	0.179	N	0.5	SignalP-TM
EFX00745	0.15	19	0.125	19	0.134	1	0.098	0.111	N	0.45	SignalP-noTM
EFX00321	0.122	62	0.117	58	0.161	46	0.102	0.111	N	0.5	SignalP-TM
EFX00485	0.441	48	0.426	23	0.769	15	0.626	0.534	Y	0.45	SignalP-noTM
EFX00593	0.113	40	0.129	11	0.19	1	0.127	0.128	N	0.45	SignalP-noTM
EFX00089	0.112	22	0.11	22	0.172	6	0.108	0.109	N	0.45	SignalP-noTM
EFX00550	0.171	22	0.158	22	0.208	2	0.145	0.151	N	0.45	SignalP-noTM
EFX00159	0.222	20	0.163	20	0.14	33	0.119	0.139	N	0.45	SignalP-noTM
EFX00035	0.111	56	0.107	67	0.117	49	0.097	0.102	N	0.45	SignalP-noTM
EFX00137	0.11	24	0.109	24	0.145	4	0.108	0.108	N	0.45	SignalP-noTM
EFX00726	0.119	53	0.112	16	0.157	12	0.119	0.116	N	0.45	SignalP-noTM
EFX00140	0.138	17	0.125	17	0.145	16	0.112	0.118	N	0.45	SignalP-noTM
EFX00469	0.211	41	0.158	54	0.202	58	0.127	0.145	N	0.5	SignalP-TM
EFX00186	0.112	17	0.106	38	0.12	22	0.099	0.102	N	0.45	SignalP-noTM
EFX00240	0.195	34	0.149	34	0.162	7	0.121	0.134	N	0.45	SignalP-noTM
EFX00508	0.115	36	0.109	12	0.124	4	0.106	0.107	N	0.45	SignalP-noTM
EFX00266	0.111	56	0.109	68	0.146	50	0.099	0.103	N	0.45	SignalP-noTM
EFX00393	0.109	22	0.108	12	0.12	48	0.11	0.109	N	0.45	SignalP-noTM
EFX00350	0.131	30	0.113	30	0.156	29	0.1	0.106	N	0.45	SignalP-noTM
EFX00455	0.107	62	0.103	62	0.112	54	0.095	0.098	N	0.45	SignalP-noTM
EFX00473	0.107	26	0.104	39	0.111	32	0.098	0.101	N	0.45	SignalP-noTM
EFX00141	0.214	40	0.118	18	0.165	8	0.13	0.123	N	0.5	SignalP-TM
EFX00358	0.111	60	0.115	60	0.145	53	0.105	0.11	N	0.45	SignalP-noTM
EFX00113	0.111	49	0.109	27	0.129	23	0.109	0.109	N	0.45	SignalP-noTM
EFX00328	0.111	35	0.111	11	0.124	1	0.105	0.108	N	0.45	SignalP-noTM
EFX00270	0.195	18	0.151	18	0.146	17	0.111	0.13	N	0.45	SignalP-noTM
EFX00226	0.275	49	0.21	49	0.211	13	0.154	0.188	N	0.5	SignalP-TM
EFX00198	0.122	42	0.111	56	0.143	15	0.096	0.105	N	0.5	SignalP-TM
EFX00486	0.11	18	0.135	12	0.216	2	0.138	0.136	N	0.45	SignalP-noTM
EFX00128	0.119	13	0.126	44	0.228	12	0.124	0.125	N	0.5	SignalP-TM
EFX00580	0.117	41	0.107	41	0.107	49	0.096	0.101	N	0.45	SignalP-noTM
EFX00652	0.126	18	0.108	18	0.106	26	0.09	0.098	N	0.45	SignalP-noTM
EFX00076	0.111	28	0.113	11	0.157	12	0.113	0.113	N	0.45	SignalP-noTM
EFX00424	0.136	52	0.15	12	0.308	2	0.201	0.177	N	0.45	SignalP-noTM
EFX00672	0.123	32	0.125	11	0.179	1	0.122	0.124	N	0.45	SignalP-noTM
EFX00387	0.252	18	0.28	18	0.465	10	0.294	0.286	N	0.5	SignalP-TM
EFX00106	0.135	24	0.144	24	0.257	23	0.153	0.149	N	0.45	SignalP-noTM
EFX00308	0.113	17	0.114	17	0.133	1	0.107	0.11	N	0.45	SignalP-noTM
EFX00402	0.138	44	0.119	44	0.157	65	0.105	0.113	N	0.5	SignalP-TM
EFX00318	0.141	35	0.181	35	0.337	30	0.204	0.19	N	0.5	SignalP-TM
EFX00639	0.109	27	0.107	12	0.145	5	0.11	0.109	N	0.45	SignalP-noTM
EFX00432	0.253	21	0.402	17	0.719	9	0.636	0.528	Y	0.45	SignalP-noTM
EFX00587	0.126	50	0.119	11	0.149	5	0.128	0.124	N	0.45	SignalP-noTM
EFX00129	0.15	22	0.22	22	0.451	4	0.318	0.273	N	0.45	SignalP-noTM
EFX00172	0.145	61	0.122	61	0.18	29	0.118	0.12	N	0.45	SignalP-noTM
EFX00562	0.178	19	0.206	19	0.352	1	0.214	0.211	N	0.45	SignalP-noTM
EFX00201	0.111	24	0.115	11	0.143	41	0.114	0.114	N	0.45	SignalP-noTM
EFX00241	0.157	23	0.135	23	0.132	1	0.116	0.124	N	0.45	SignalP-noTM
EFX00617	0.205	43	0.179	21	0.465	14	0.266	0.213	N	0.5	SignalP-TM
EFX00379	0.113	41	0.112	12	0.137	2	0.113	0.113	N	0.45	SignalP-noTM
EFX00124	0.119	19	0.11	19	0.139	24	0.101	0.105	N	0.45	SignalP-noTM
EFX00292	0.109	14	0.105	31	0.131	48	0.099	0.102	N	0.45	SignalP-noTM
EFX00523	0.137	41	0.119	41	0.127	5	0.105	0.111	N	0.45	SignalP-noTM
EFX00336	0.189	29	0.181	29	0.303	28	0.172	0.176	N	0.45	SignalP-noTM
EFX00238	0.191	31	0.232	31	0.401	19	0.241	0.237	N	0.45	SignalP-noTM
EFX00658	0.113	68	0.114	15	0.137	1	0.115	0.115	N	0.45	SignalP-noTM
EFX00100	0.127	24	0.163	11	0.31	1	0.194	0.18	N	0.45	SignalP-noTM
EFX00747	0.111	28	0.127	11	0.166	1	0.134	0.131	N	0.45	SignalP-noTM
EFX00656	0.122	21	0.124	21	0.157	40	0.126	0.125	N	0.45	SignalP-noTM
EFX00734	0.113	34	0.115	12	0.175	2	0.128	0.122	N	0.45	SignalP-noTM
EFX00367	0.333	31	0.292	31	0.387	26	0.219	0.263	N	0.5	SignalP-TM
EFX00045	0.163	18	0.268	18	0.55	1	0.409	0.344	N	0.45	SignalP-noTM
EFX00487	0.13	42	0.119	11	0.146	1	0.109	0.114	N	0.45	SignalP-noTM
EFX00208	0.158	21	0.242	19	0.5	16	0.373	0.313	N	0.45	SignalP-noTM
EFX00552	0.126	44	0.158	24	0.306	39	0.189	0.17	N	0.5	SignalP-TM
EFX00156	0.138	24	0.219	11	0.561	1	0.339	0.284	N	0.45	SignalP-noTM
EFX00721	0.111	56	0.121	11	0.154	2	0.122	0.122	N	0.45	SignalP-noTM
EFX00608	0.11	32	0.115	11	0.134	1	0.11	0.112	N	0.45	SignalP-noTM
EFX00414	0.11	61	0.109	61	0.128	43	0.101	0.104	N	0.45	SignalP-noTM
EFX00289	0.111	59	0.108	45	0.116	27	0.104	0.106	N	0.45	SignalP-noTM
EFX00531	0.127	33	0.162	33	0.244	25	0.188	0.172	N	0.5	SignalP-TM
EFX00391	0.111	27	0.106	65	0.117	43	0.097	0.101	N	0.45	SignalP-noTM
EFX00440	0.112	24	0.11	11	0.128	1	0.104	0.107	N	0.45	SignalP-noTM
EFX00037	0.27	21	0.488	21	0.943	4	0.88	0.7	Y	0.45	SignalP-noTM
EFX00228	0.11	24	0.105	58	0.115	48	0.098	0.101	N	0.45	SignalP-noTM
EFX00165	0.113	69	0.108	69	0.116	6	0.102	0.105	N	0.45	SignalP-noTM
EFX00563	0.202	20	0.43	20	0.958	15	0.915	0.692	Y	0.45	SignalP-noTM
EFX00505	0.111	32	0.109	32	0.124	25	0.103	0.106	N	0.45	SignalP-noTM
EFX00221	0.123	30	0.108	45	0.117	64	0.096	0.102	N	0.45	SignalP-noTM
EFX00102	0.115	51	0.126	11	0.18	1	0.114	0.12	N	0.45	SignalP-noTM
EFX00425	0.122	70	0.11	70	0.117	25	0.099	0.104	N	0.45	SignalP-noTM
EFX00371	0.122	45	0.122	45	0.233	42	0.109	0.115	N	0.45	SignalP-noTM
EFX00631	0.158	54	0.13	54	0.242	47	0.107	0.117	N	0.45	SignalP-noTM
EFX00279	0.153	40	0.185	40	0.345	39	0.213	0.196	N	0.5	SignalP-TM
EFX00542	0.146	35	0.166	16	0.269	13	0.232	0.192	N	0.5	SignalP-TM
EFX00313	0.12	65	0.116	65	0.162	50	0.106	0.11	N	0.45	SignalP-noTM
EFX00239	0.182	19	0.239	19	0.454	6	0.309	0.276	N	0.45	SignalP-noTM
EFX00146	0.111	26	0.111	38	0.128	30	0.104	0.107	N	0.45	SignalP-noTM
EFX00034	0.108	18	0.107	32	0.117	22	0.105	0.106	N	0.45	SignalP-noTM
EFX00725	0.122	27	0.132	11	0.192	2	0.157	0.145	N	0.45	SignalP-noTM
EFX00606	0.421	36	0.29	36	0.351	34	0.192	0.237	N	0.45	SignalP-noTM
EFX00517	0.123	50	0.113	50	0.146	49	0.1	0.106	N	0.45	SignalP-noTM
EFX00426	0.118	33	0.121	33	0.199	28	0.123	0.123	N	0.45	SignalP-noTM
EFX00281	0.109	44	0.106	41	0.121	15	0.1	0.103	N	0.45	SignalP-noTM
EFX00396	0.131	22	0.116	22	0.119	2	0.101	0.108	N	0.45	SignalP-noTM
EFX00179	0.133	36	0.23	16	0.674	6	0.533	0.394	N	0.45	SignalP-noTM
EFX00483	0.13	16	0.241	16	0.591	12	0.445	0.323	N	0.5	SignalP-TM
EFX00610	0.108	36	0.115	12	0.173	11	0.117	0.116	N	0.45	SignalP-noTM
EFX00501	0.298	51	0.261	51	0.355	49	0.135	0.211	N	0.5	SignalP-TM
EFX00091	0.111	64	0.107	39	0.119	24	0.102	0.105	N	0.45	SignalP-noTM
EFX00733	0.108	29	0.106	57	0.117	47	0.1	0.103	N	0.45	SignalP-noTM
EFX00115	0.114	18	0.121	11	0.149	1	0.123	0.122	N	0.45	SignalP-noTM
EFX00559	0.12	51	0.113	51	0.15	50	0.102	0.107	N	0.45	SignalP-noTM
EFX00472	0.124	31	0.13	31	0.182	29	0.128	0.129	N	0.45	SignalP-noTM
EFX00189	0.122	50	0.138	34	0.221	17	0.164	0.152	N	0.45	SignalP-noTM
EFX00654	0.167	26	0.147	26	0.221	22	0.135	0.142	N	0.5	SignalP-TM
EFX00628	0.194	54	0.149	22	0.275	18	0.176	0.163	N	0.45	SignalP-noTM
EFX00728	0.144	39	0.187	39	0.493	32	0.221	0.206	N	0.45	SignalP-noTM
EFX00083	0.117	45	0.116	12	0.145	1	0.109	0.112	N	0.45	SignalP-noTM
EFX00178	0.84	23	0.788	23	0.883	19	0.758	0.776	Y	0.5	SignalP-TM
EFX00331	0.297	24	0.205	24	0.201	1	0.144	0.172	N	0.45	SignalP-noTM
EFX00666	0.128	21	0.138	21	0.198	3	0.147	0.142	N	0.45	SignalP-noTM
EFX00245	0.113	21	0.113	11	0.133	1	0.112	0.113	N	0.45	SignalP-noTM
EFX00202	0.11	42	0.105	42	0.109	58	0.098	0.101	N	0.45	SignalP-noTM
EFX00111	0.142	42	0.121	13	0.159	12	0.127	0.124	N	0.45	SignalP-noTM
EFX00713	0.142	45	0.137	45	0.211	19	0.133	0.135	N	0.45	SignalP-noTM
EFX00098	0.208	25	0.14	25	0.133	55	0.093	0.115	N	0.45	SignalP-noTM
EFX00349	0.111	37	0.11	37	0.157	23	0.105	0.107	N	0.45	SignalP-noTM
EFX00265	0.141	55	0.121	55	0.118	55	0.099	0.109	N	0.45	SignalP-noTM
EFX00619	0.153	24	0.122	24	0.16	1	0.101	0.111	N	0.45	SignalP-noTM
EFX00498	0.113	68	0.107	68	0.117	1	0.099	0.102	N	0.45	SignalP-noTM
EFX00438	0.776	30	0.695	30	0.884	1	0.663	0.678	Y	0.45	SignalP-noTM
EFX00571	0.109	58	0.104	70	0.108	47	0.096	0.099	N	0.45	SignalP-noTM
EFX00143	0.113	31	0.118	12	0.151	1	0.109	0.113	N	0.45	SignalP-noTM
EFX00394	0.11	58	0.106	29	0.129	12	0.103	0.104	N	0.45	SignalP-noTM
EFX00163	0.109	49	0.106	62	0.12	25	0.099	0.103	N	0.45	SignalP-noTM
EFX00612	0.114	67	0.116	67	0.193	46	0.104	0.11	N	0.45	SignalP-noTM
EFX00419	0.113	43	0.108	43	0.127	42	0.098	0.102	N	0.45	SignalP-noTM
EFX00736	0.3	27	0.235	27	0.236	11	0.188	0.209	N	0.45	SignalP-noTM
EFX00494	0.115	17	0.15	11	0.272	1	0.166	0.159	N	0.45	SignalP-noTM
EFX00461	0.12	27	0.136	11	0.221	6	0.178	0.159	N	0.45	SignalP-noTM
EFX00093	0.146	24	0.117	45	0.165	44	0.103	0.109	N	0.45	SignalP-noTM
EFX00166	0.109	67	0.106	67	0.118	22	0.099	0.102	N	0.45	SignalP-noTM
EFX00724	0.171	65	0.131	65	0.125	1	0.101	0.115	N	0.45	SignalP-noTM
EFX00702	0.341	22	0.249	22	0.318	3	0.179	0.211	N	0.45	SignalP-noTM
EFX00415	0.132	42	0.12	42	0.152	39	0.113	0.116	N	0.45	SignalP-noTM
EFX00451	0.108	61	0.103	27	0.117	7	0.1	0.101	N	0.45	SignalP-noTM
EFX00548	0.122	62	0.118	62	0.157	28	0.113	0.116	N	0.45	SignalP-noTM
EFX00348	0.11	36	0.104	12	0.121	54	0.097	0.1	N	0.45	SignalP-noTM
EFX00670	0.134	38	0.125	38	0.169	13	0.12	0.122	N	0.45	SignalP-noTM
EFX00604	0.143	26	0.117	26	0.12	25	0.097	0.106	N	0.45	SignalP-noTM
EFX00161	0.122	30	0.16	17	0.277	16	0.228	0.196	N	0.45	SignalP-noTM
EFX00528	0.131	17	0.187	17	0.336	4	0.262	0.228	N	0.45	SignalP-noTM
EFX00048	0.143	20	0.196	20	0.328	4	0.262	0.232	N	0.45	SignalP-noTM
EFX00268	0.112	46	0.107	67	0.131	53	0.101	0.104	N	0.45	SignalP-noTM
EFX00389	0.17	42	0.133	42	0.138	41	0.102	0.116	N	0.45	SignalP-noTM
EFX00304	0.245	19	0.324	19	0.594	15	0.43	0.381	N	0.45	SignalP-noTM
EFX00339	0.118	44	0.142	17	0.227	2	0.162	0.153	N	0.45	SignalP-noTM
EFX00073	0.115	18	0.108	32	0.12	23	0.103	0.105	N	0.45	SignalP-noTM
EFX00052	0.12	22	0.117	22	0.158	18	0.114	0.115	N	0.45	SignalP-noTM
EFX00049	0.155	63	0.125	63	0.14	2	0.102	0.112	N	0.45	SignalP-noTM
EFX00300	0.113	66	0.111	26	0.12	9	0.11	0.11	N	0.45	SignalP-noTM
EFX00139	0.21	26	0.167	34	0.359	2	0.134	0.154	N	0.5	SignalP-TM
EFX00718	0.112	28	0.12	11	0.144	7	0.126	0.124	N	0.45	SignalP-noTM
EFX00686	0.134	20	0.107	44	0.121	20	0.096	0.101	N	0.45	SignalP-noTM
EFX00627	0.11	22	0.111	12	0.126	1	0.107	0.109	N	0.45	SignalP-noTM
EFX00053	0.108	36	0.107	36	0.135	3	0.107	0.107	N	0.45	SignalP-noTM
EFX00459	0.109	28	0.106	15	0.124	39	0.106	0.106	N	0.45	SignalP-noTM
EFX00740	0.115	58	0.11	41	0.122	29	0.102	0.106	N	0.45	SignalP-noTM
EFX00739	0.11	24	0.104	58	0.112	1	0.097	0.1	N	0.45	SignalP-noTM
EFX00484	0.119	21	0.184	15	0.416	2	0.3	0.231	N	0.5	SignalP-TM
EFX00434	0.145	22	0.122	22	0.114	43	0.102	0.111	N	0.45	SignalP-noTM
EFX00480	0.162	23	0.146	23	0.169	22	0.131	0.138	N	0.45	SignalP-noTM
EFX00382	0.124	37	0.114	17	0.135	14	0.119	0.116	N	0.45	SignalP-noTM
EFX00503	0.118	22	0.122	19	0.158	9	0.127	0.125	N	0.45	SignalP-noTM
EFX00429	0.136	47	0.126	17	0.146	16	0.119	0.122	N	0.45	SignalP-noTM
EFX00700	0.151	32	0.124	32	0.121	2	0.105	0.114	N	0.45	SignalP-noTM
EFX00383	0.109	55	0.104	55	0.11	45	0.094	0.099	N	0.45	SignalP-noTM
EFX00235	0.112	44	0.127	12	0.171	1	0.135	0.131	N	0.45	SignalP-noTM
EFX00668	0.109	51	0.11	11	0.13	6	0.111	0.111	N	0.45	SignalP-noTM
EFX00309	0.163	28	0.169	28	0.259	10	0.18	0.175	N	0.45	SignalP-noTM
EFX00047	0.11	52	0.122	59	0.315	47	0.119	0.12	N	0.45	SignalP-noTM
EFX00043	0.112	55	0.109	22	0.116	14	0.107	0.108	N	0.45	SignalP-noTM
EFX00149	0.135	40	0.127	11	0.17	1	0.131	0.129	N	0.45	SignalP-noTM
EFX00142	0.112	44	0.11	44	0.12	26	0.1	0.105	N	0.45	SignalP-noTM
EFX00750	0.116	25	0.142	13	0.266	12	0.201	0.174	N	0.45	SignalP-noTM
EFX00592	0.11	28	0.115	12	0.175	4	0.133	0.125	N	0.45	SignalP-noTM
EFX00632	0.107	46	0.106	46	0.109	41	0.099	0.103	N	0.5	SignalP-TM
EFX00543	0.108	65	0.105	34	0.117	32	0.099	0.102	N	0.45	SignalP-noTM
EFX00427	0.188	19	0.145	19	0.132	30	0.112	0.127	N	0.45	SignalP-noTM
EFX00751	0.111	38	0.128	46	0.227	41	0.137	0.133	N	0.45	SignalP-noTM
EFX00169	0.113	70	0.118	12	0.142	6	0.126	0.122	N	0.45	SignalP-noTM
EFX00123	0.11	66	0.106	26	0.123	14	0.102	0.104	N	0.45	SignalP-noTM
EFX00273	0.115	36	0.111	36	0.147	34	0.109	0.11	N	0.45	SignalP-noTM
EFX00216	0.164	46	0.167	46	0.377	44	0.135	0.15	N	0.45	SignalP-noTM
EFX00333	0.134	25	0.119	25	0.131	1	0.107	0.113	N	0.45	SignalP-noTM
EFX00551	0.111	65	0.105	42	0.115	40	0.097	0.101	N	0.45	SignalP-noTM
EFX00698	0.164	59	0.128	59	0.11	53	0.098	0.112	N	0.45	SignalP-noTM
EFX00607	0.447	21	0.438	21	0.758	1	0.396	0.415	N	0.45	SignalP-noTM
EFX00305	0.112	29	0.111	48	0.137	35	0.107	0.108	N	0.45	SignalP-noTM
EFX00395	0.108	29	0.105	55	0.113	48	0.098	0.101	N	0.45	SignalP-noTM
EFX00173	0.111	31	0.109	15	0.12	1	0.111	0.11	N	0.45	SignalP-noTM
EFX00475	0.342	20	0.522	18	0.904	8	0.809	0.677	Y	0.45	SignalP-noTM
EFX00674	0.124	42	0.111	42	0.128	1	0.1	0.105	N	0.45	SignalP-noTM
EFX00643	0.152	32	0.117	32	0.109	25	0.093	0.104	N	0.45	SignalP-noTM
EFX00116	0.141	20	0.159	20	0.216	1	0.172	0.166	N	0.45	SignalP-noTM
EFX00215	0.44	18	0.38	18	0.411	6	0.341	0.359	N	0.45	SignalP-noTM
EFX00066	0.111	46	0.104	66	0.118	32	0.099	0.101	N	0.45	SignalP-noTM
EFX00325	0.117	52	0.111	34	0.14	15	0.107	0.109	N	0.45	SignalP-noTM
EFX00117	0.112	70	0.108	70	0.112	67	0.101	0.104	N	0.45	SignalP-noTM
EFX00466	0.184	46	0.153	46	0.204	37	0.119	0.134	N	0.45	SignalP-noTM
EFX00257	0.488	17	0.638	17	0.87	2	0.836	0.745	Y	0.45	SignalP-noTM
EFX00370	0.164	34	0.18	11	0.406	1	0.284	0.221	N	0.5	SignalP-TM
EFX00502	0.122	32	0.121	22	0.221	4	0.131	0.126	N	0.45	SignalP-noTM
EFX00175	0.19	18	0.369	18	0.85	2	0.683	0.539	Y	0.45	SignalP-noTM
EFX00347	0.109	61	0.105	61	0.114	49	0.099	0.102	N	0.45	SignalP-noTM
EFX00722	0.132	40	0.115	40	0.146	6	0.108	0.111	N	0.45	SignalP-noTM
EFX00079	0.119	22	0.117	22	0.151	13	0.115	0.116	N	0.45	SignalP-noTM
EFX00706	0.114	36	0.112	36	0.125	27	0.105	0.108	N	0.45	SignalP-noTM
EFX00127	0.113	43	0.105	70	0.111	68	0.093	0.098	N	0.45	SignalP-noTM
EFX00164	0.174	20	0.231	20	0.419	2	0.328	0.27	N	0.5	SignalP-TM
EFX00659	0.181	22	0.128	22	0.149	40	0.095	0.115	N	0.5	SignalP-TM
EFX00244	0.128	29	0.126	12	0.185	6	0.153	0.137	N	0.5	SignalP-TM
EFX00727	0.111	26	0.106	14	0.118	12	0.107	0.106	N	0.45	SignalP-noTM
EFX00381	0.11	44	0.109	44	0.12	34	0.102	0.105	N	0.45	SignalP-noTM
EFX00369	0.128	31	0.152	44	0.277	36	0.163	0.157	N	0.5	SignalP-TM
EFX00039	0.112	44	0.117	57	0.139	48	0.112	0.114	N	0.45	SignalP-noTM
EFX00477	0.112	42	0.108	42	0.114	24	0.101	0.104	N	0.45	SignalP-noTM
EFX00446	0.113	32	0.108	11	0.122	5	0.111	0.11	N	0.45	SignalP-noTM
EFX00067	0.421	25	0.294	25	0.38	1	0.219	0.254	N	0.45	SignalP-noTM
EFX00253	0.111	37	0.105	37	0.127	55	0.094	0.099	N	0.45	SignalP-noTM
EFX00196	0.12	26	0.143	11	0.229	1	0.171	0.158	N	0.45	SignalP-noTM
EFX00400	0.435	16	0.568	16	0.813	15	0.728	0.654	Y	0.45	SignalP-noTM
EFX00386	0.112	28	0.113	28	0.139	12	0.112	0.112	N	0.45	SignalP-noTM
EFX00662	0.109	53	0.11	51	0.129	25	0.103	0.106	N	0.45	SignalP-noTM
EFX00741	0.118	62	0.115	14	0.194	32	0.12	0.118	N	0.45	SignalP-noTM
EFX00454	0.11	50	0.126	12	0.165	3	0.136	0.131	N	0.45	SignalP-noTM
EFX00723	0.111	57	0.106	57	0.112	19	0.097	0.101	N	0.45	SignalP-noTM
EFX00055	0.124	18	0.13	18	0.165	6	0.135	0.133	N	0.45	SignalP-noTM
EFX00147	0.123	21	0.141	21	0.193	1	0.159	0.151	N	0.45	SignalP-noTM
EFX00195	0.14	48	0.195	15	0.447	12	0.305	0.239	N	0.5	SignalP-TM
EFX00343	0.111	36	0.105	36	0.111	27	0.097	0.101	N	0.45	SignalP-noTM
EFX00293	0.114	40	0.108	40	0.133	12	0.102	0.105	N	0.45	SignalP-noTM
EFX00044	0.118	33	0.124	11	0.203	2	0.151	0.139	N	0.45	SignalP-noTM
EFX00153	0.152	47	0.136	47	0.152	45	0.117	0.126	N	0.45	SignalP-noTM
EFX00334	0.123	33	0.134	11	0.256	3	0.196	0.168	N	0.45	SignalP-noTM
EFX00171	0.142	47	0.118	47	0.124	46	0.098	0.107	N	0.45	SignalP-noTM
EFX00144	0.109	60	0.104	40	0.115	32	0.095	0.099	N	0.45	SignalP-noTM
EFX00649	0.112	60	0.11	60	0.123	38	0.102	0.106	N	0.45	SignalP-noTM
EFX00620	0.107	17	0.125	63	0.179	54	0.112	0.12	N	0.5	SignalP-TM
EFX00177	0.144	20	0.124	20	0.131	36	0.106	0.114	N	0.45	SignalP-noTM
EFX00360	0.132	24	0.172	11	0.342	1	0.231	0.204	N	0.45	SignalP-noTM
EFX00705	0.173	32	0.147	32	0.205	31	0.129	0.137	N	0.45	SignalP-noTM
EFX00436	0.145	19	0.114	19	0.12	45	0.091	0.102	N	0.45	SignalP-noTM
EFX00470	0.204	50	0.175	50	0.251	47	0.125	0.148	N	0.45	SignalP-noTM
EFX00679	0.109	22	0.103	56	0.106	50	0.095	0.098	N	0.45	SignalP-noTM
EFX00749	0.145	22	0.127	22	0.129	2	0.111	0.118	N	0.45	SignalP-noTM
EFX00095	0.169	21	0.216	21	0.375	1	0.265	0.242	N	0.45	SignalP-noTM
EFX00586	0.112	21	0.116	21	0.161	4	0.12	0.118	N	0.45	SignalP-noTM
EFX00683	0.109	48	0.105	53	0.136	47	0.102	0.103	N	0.45	SignalP-noTM
EFX00457	0.131	34	0.112	34	0.121	7	0.098	0.105	N	0.45	SignalP-noTM
EFX00489	0.512	24	0.455	24	0.671	21	0.396	0.423	N	0.45	SignalP-noTM
EFX00224	0.163	26	0.254	26	0.599	7	0.429	0.324	N	0.5	SignalP-TM
EFX00520	0.116	16	0.133	16	0.188	11	0.143	0.138	N	0.45	SignalP-noTM
EFX00060	0.204	31	0.171	31	0.282	4	0.168	0.169	N	0.45	SignalP-noTM
EFX00687	0.115	28	0.108	57	0.114	44	0.098	0.103	N	0.45	SignalP-noTM
EFX00732	0.114	23	0.126	23	0.172	21	0.14	0.133	N	0.45	SignalP-noTM
EFX00625	0.137	18	0.243	18	0.692	1	0.467	0.332	N	0.5	SignalP-TM
EFX00254	0.548	20	0.698	20	0.953	11	0.882	0.798	Y	0.45	SignalP-noTM
EFX00537	0.191	19	0.239	19	0.473	1	0.325	0.273	N	0.5	SignalP-TM
EFX00525	0.109	12	0.105	12	0.115	22	0.098	0.101	N	0.45	SignalP-noTM
EFX00205	0.11	57	0.106	57	0.119	38	0.098	0.102	N	0.45	SignalP-noTM
EFX00482	0.108	43	0.106	43	0.112	25	0.098	0.101	N	0.45	SignalP-noTM
EFX00392	0.144	31	0.152	31	0.243	27	0.16	0.156	N	0.45	SignalP-noTM
EFX00298	0.116	21	0.128	11	0.184	1	0.133	0.131	N	0.45	SignalP-noTM
EFX00271	0.118	64	0.108	64	0.126	20	0.098	0.103	N	0.45	SignalP-noTM
EFX00220	0.139	18	0.216	18	0.435	17	0.341	0.283	N	0.45	SignalP-noTM
EFX00131	0.153	33	0.174	16	0.432	3	0.284	0.234	N	0.45	SignalP-noTM
EFX00214	0.108	45	0.129	17	0.241	5	0.163	0.147	N	0.45	SignalP-noTM
EFX00070	0.114	29	0.11	46	0.144	42	0.097	0.105	N	0.5	SignalP-TM
EFX00080	0.151	29	0.121	29	0.145	28	0.095	0.107	N	0.45	SignalP-noTM
EFX00476	0.113	70	0.11	32	0.134	13	0.105	0.107	N	0.45	SignalP-noTM
EFX00596	0.111	13	0.143	13	0.241	1	0.137	0.14	N	0.45	SignalP-noTM
EFX00435	0.123	46	0.118	46	0.253	45	0.102	0.11	N	0.45	SignalP-noTM
EFX00719	0.113	25	0.114	53	0.132	47	0.106	0.109	N	0.45	SignalP-noTM
EFX00232	0.134	15	0.149	15	0.203	3	0.16	0.155	N	0.45	SignalP-noTM
EFX00351	0.18	16	0.284	16	0.659	3	0.391	0.342	N	0.45	SignalP-noTM
EFX00715	0.116	45	0.107	45	0.11	44	0.093	0.1	N	0.45	SignalP-noTM
EFX00135	0.131	24	0.112	24	0.119	25	0.096	0.103	N	0.45	SignalP-noTM
EFX00576	0.135	55	0.151	12	0.32	46	0.141	0.146	N	0.45	SignalP-noTM
EFX00303	0.119	27	0.128	11	0.183	1	0.124	0.126	N	0.45	SignalP-noTM
EFX00743	0.115	28	0.117	12	0.16	6	0.131	0.124	N	0.45	SignalP-noTM
EFX00681	0.116	20	0.105	40	0.12	35	0.096	0.1	N	0.45	SignalP-noTM
EFX00583	0.18	21	0.266	21	0.562	17	0.386	0.331	N	0.45	SignalP-noTM
EFX00407	0.12	50	0.115	28	0.161	27	0.116	0.115	N	0.5	SignalP-TM
EFX00158	0.389	19	0.531	19	0.831	14	0.712	0.629	Y	0.45	SignalP-noTM
EFX00081	0.165	38	0.152	38	0.251	37	0.145	0.149	N	0.45	SignalP-noTM
EFX00068	0.11	27	0.117	27	0.169	13	0.119	0.118	N	0.45	SignalP-noTM
EFX00077	0.336	53	0.232	22	0.524	11	0.367	0.286	N	0.5	SignalP-TM
EFX00378	0.117	38	0.11	38	0.12	40	0.099	0.104	N	0.45	SignalP-noTM
EFX00521	0.169	29	0.128	29	0.182	44	0.105	0.116	N	0.45	SignalP-noTM
EFX00233	0.109	35	0.105	35	0.113	64	0.101	0.103	N	0.45	SignalP-noTM
EFX00689	0.122	58	0.111	14	0.127	1	0.105	0.108	N	0.45	SignalP-noTM
EFX00535	0.113	22	0.153	12	0.366	2	0.208	0.183	N	0.45	SignalP-noTM
EFX00420	0.109	70	0.108	49	0.118	38	0.097	0.102	N	0.45	SignalP-noTM
EFX00568	0.208	17	0.217	17	0.292	14	0.223	0.22	N	0.45	SignalP-noTM
EFX00314	0.128	35	0.13	11	0.194	1	0.13	0.13	N	0.45	SignalP-noTM
EFX00712	0.191	16	0.177	34	0.272	20	0.169	0.173	N	0.45	SignalP-noTM
EFX00356	0.114	67	0.11	67	0.134	50	0.098	0.104	N	0.45	SignalP-noTM
EFX00661	0.107	51	0.104	66	0.113	29	0.099	0.101	N	0.45	SignalP-noTM
EFX00110	0.113	23	0.127	12	0.185	1	0.135	0.132	N	0.45	SignalP-noTM
EFX00151	0.111	69	0.106	69	0.11	32	0.097	0.101	N	0.45	SignalP-noTM
EFX00611	0.11	54	0.114	12	0.141	1	0.103	0.108	N	0.45	SignalP-noTM
EFX00442	0.128	17	0.128	17	0.152	1	0.119	0.123	N	0.45	SignalP-noTM
EFX00497	0.11	48	0.116	12	0.149	1	0.119	0.118	N	0.45	SignalP-noTM
EFX00675	0.119	24	0.106	24	0.117	1	0.095	0.1	N	0.45	SignalP-noTM
EFX00634	0.109	30	0.104	52	0.115	3	0.097	0.1	N	0.45	SignalP-noTM
EFX00684	0.143	18	0.119	18	0.134	17	0.1	0.109	N	0.45	SignalP-noTM
EFX00561	0.109	60	0.102	63	0.107	62	0.095	0.098	N	0.45	SignalP-noTM
EFX00155	0.109	55	0.104	55	0.115	23	0.097	0.1	N	0.45	SignalP-noTM
EFX00362	0.108	64	0.103	64	0.111	60	0.095	0.099	N	0.45	SignalP-noTM
EFX00518	0.166	33	0.14	33	0.165	31	0.116	0.127	N	0.45	SignalP-noTM
EFX00326	0.135	40	0.129	40	0.17	9	0.121	0.125	N	0.45	SignalP-noTM
EFX00410	0.168	24	0.141	24	0.176	21	0.119	0.13	N	0.45	SignalP-noTM
EFX00368	0.246	19	0.188	19	0.176	1	0.136	0.16	N	0.45	SignalP-noTM
EFX00685	0.796	21	0.791	21	0.898	2	0.776	0.783	Y	0.45	SignalP-noTM
EFX00692	0.393	23	0.592	23	0.945	16	0.892	0.754	Y	0.45	SignalP-noTM
EFX00594	0.129	36	0.115	36	0.132	34	0.104	0.109	N	0.45	SignalP-noTM
EFX00448	0.11	56	0.123	12	0.176	2	0.121	0.122	N	0.45	SignalP-noTM
EFX00301	0.124	40	0.113	40	0.121	21	0.1	0.106	N	0.45	SignalP-noTM
EFX00529	0.128	23	0.12	23	0.139	3	0.113	0.116	N	0.45	SignalP-noTM
EFX00051	0.118	34	0.112	56	0.179	40	0.104	0.108	N	0.45	SignalP-noTM
EFX00346	0.127	29	0.146	29	0.208	18	0.165	0.153	N	0.5	SignalP-TM
EFX00630	0.125	48	0.116	48	0.128	46	0.107	0.111	N	0.45	SignalP-noTM
EFX00691	0.121	34	0.124	18	0.213	5	0.134	0.129	N	0.45	SignalP-noTM
EFX00148	0.286	35	0.225	35	0.361	34	0.184	0.203	N	0.45	SignalP-noTM
EFX00085	0.122	29	0.122	48	0.194	47	0.108	0.115	N	0.45	SignalP-noTM
EFX00219	0.171	26	0.148	26	0.206	5	0.135	0.141	N	0.45	SignalP-noTM
EFX00644	0.113	16	0.104	51	0.116	35	0.097	0.1	N	0.45	SignalP-noTM
EFX00731	0.118	21	0.122	21	0.16	1	0.123	0.123	N	0.45	SignalP-noTM
EFX00717	0.11	63	0.109	50	0.124	33	0.103	0.106	N	0.45	SignalP-noTM
EFX00231	0.236	56	0.157	56	0.142	54	0.101	0.127	N	0.45	SignalP-noTM
EFX00500	0.111	35	0.106	45	0.116	34	0.099	0.102	N	0.45	SignalP-noTM
EFX00312	0.137	18	0.154	18	0.287	16	0.176	0.166	N	0.45	SignalP-noTM
EFX00431	0.124	21	0.111	21	0.125	28	0.099	0.105	N	0.45	SignalP-noTM
EFX00056	0.107	70	0.107	28	0.132	15	0.107	0.107	N	0.45	SignalP-noTM
EFX00317	0.581	19	0.713	19	0.909	13	0.885	0.806	Y	0.45	SignalP-noTM
EFX00549	0.361	19	0.503	19	0.818	5	0.7	0.609	Y	0.45	SignalP-noTM
EFX00296	0.111	59	0.112	13	0.13	1	0.108	0.11	N	0.45	SignalP-noTM
EFX00065	0.108	29	0.109	45	0.138	4	0.108	0.108	N	0.45	SignalP-noTM
EFX00624	0.158	32	0.155	32	0.247	28	0.147	0.151	N	0.45	SignalP-noTM
EFX00256	0.22	21	0.342	21	0.678	3	0.525	0.441	N	0.45	SignalP-noTM
EFX00385	0.113	31	0.114	31	0.149	4	0.113	0.113	N	0.5	SignalP-TM
EFX00337	0.229	35	0.175	35	0.21	33	0.129	0.15	N	0.45	SignalP-noTM
EFX00464	0.112	60	0.108	16	0.125	36	0.103	0.105	N	0.45	SignalP-noTM
EFX00154	0.144	16	0.143	16	0.205	32	0.146	0.145	N	0.45	SignalP-noTM
EFX00405	0.451	17	0.615	17	0.874	9	0.828	0.73	Y	0.45	SignalP-noTM
EFX00194	0.112	50	0.123	50	0.269	42	0.115	0.119	N	0.45	SignalP-noTM
EFX00071	0.137	49	0.124	12	0.157	7	0.138	0.132	N	0.45	SignalP-noTM
EFX00504	0.111	33	0.11	54	0.126	48	0.103	0.106	N	0.45	SignalP-noTM
EFX00097	0.147	50	0.138	19	0.221	15	0.176	0.153	N	0.5	SignalP-TM
EFX00622	0.235	43	0.162	43	0.238	42	0.104	0.131	N	0.45	SignalP-noTM
EFX00112	0.109	63	0.105	66	0.114	4	0.098	0.101	N	0.45	SignalP-noTM
EFX00546	0.125	19	0.11	19	0.13	4	0.098	0.103	N	0.45	SignalP-noTM
EFX00417	0.118	18	0.109	18	0.118	1	0.096	0.102	N	0.45	SignalP-noTM
EFX00340	0.237	58	0.295	20	0.731	11	0.606	0.419	N	0.5	SignalP-TM
EFX00184	0.114	37	0.115	11	0.144	5	0.121	0.118	N	0.45	SignalP-noTM
EFX00667	0.127	29	0.122	29	0.141	38	0.106	0.116	N	0.5	SignalP-TM
EFX00413	0.154	18	0.28	18	0.664	1	0.462	0.378	N	0.45	SignalP-noTM
EFX00677	0.12	28	0.108	46	0.12	27	0.1	0.104	N	0.45	SignalP-noTM
EFX00491	0.153	43	0.138	43	0.189	34	0.117	0.13	N	0.5	SignalP-TM
EFX00374	0.125	44	0.113	44	0.174	43	0.101	0.107	N	0.45	SignalP-noTM
EFX00406	0.18	28	0.143	28	0.189	2	0.121	0.131	N	0.45	SignalP-noTM
EFX00332	0.11	51	0.106	66	0.114	52	0.096	0.101	N	0.45	SignalP-noTM
EFX00492	0.484	19	0.582	19	0.817	18	0.681	0.635	Y	0.45	SignalP-noTM
EFX00603	0.117	49	0.102	70	0.136	3	0.088	0.097	N	0.5	SignalP-TM
EFX00108	0.231	28	0.178	28	0.279	27	0.147	0.161	N	0.45	SignalP-noTM
EFX00064	0.11	58	0.102	58	0.108	21	0.094	0.098	N	0.45	SignalP-noTM
EFX00160	0.178	38	0.152	38	0.219	35	0.125	0.137	N	0.45	SignalP-noTM
EFX00174	0.276	34	0.263	34	0.338	7	0.248	0.255	N	0.45	SignalP-noTM
EFX00284	0.195	14	0.15	14	0.137	1	0.099	0.122	N	0.45	SignalP-noTM
EFX00354	0.867	25	0.81	25	0.925	5	0.763	0.784	Y	0.45	SignalP-noTM
EFX00373	0.115	19	0.107	19	0.113	56	0.099	0.103	N	0.45	SignalP-noTM
EFX00157	0.113	34	0.114	45	0.172	42	0.111	0.112	N	0.45	SignalP-noTM
EFX00138	0.138	27	0.126	27	0.138	13	0.113	0.119	N	0.45	SignalP-noTM
EFX00605	0.123	25	0.141	25	0.258	20	0.164	0.154	N	0.45	SignalP-noTM
EFX00449	0.117	23	0.116	12	0.146	5	0.125	0.121	N	0.45	SignalP-noTM
EFX00539	0.55	26	0.67	26	0.9	13	0.813	0.747	Y	0.45	SignalP-noTM
EFX00737	0.343	17	0.55	17	0.925	3	0.882	0.729	Y	0.45	SignalP-noTM
EFX00515	0.141	40	0.125	40	0.145	37	0.107	0.115	N	0.45	SignalP-noTM
EFX00626	0.11	44	0.106	45	0.123	43	0.096	0.101	N	0.45	SignalP-noTM
EFX00465	0.118	31	0.128	14	0.236	12	0.148	0.139	N	0.45	SignalP-noTM
EFX00657	0.112	58	0.118	11	0.145	1	0.123	0.121	N	0.45	SignalP-noTM
EFX00248	0.119	34	0.214	11	0.535	1	0.415	0.294	N	0.5	SignalP-TM
EFX00211	0.109	57	0.106	57	0.121	53	0.098	0.101	N	0.45	SignalP-noTM
EFX00315	0.415	20	0.533	20	0.834	13	0.697	0.622	Y	0.45	SignalP-noTM
EFX00122	0.11	68	0.103	68	0.109	8	0.095	0.099	N	0.45	SignalP-noTM
EFX00230	0.173	25	0.152	25	0.182	3	0.134	0.143	N	0.45	SignalP-noTM
EFX00061	0.118	27	0.173	17	0.309	2	0.267	0.224	N	0.45	SignalP-noTM
EFX00526	0.108	62	0.105	62	0.114	52	0.097	0.1	N	0.45	SignalP-noTM
EFX00495	0.151	58	0.142	12	0.273	23	0.188	0.166	N	0.45	SignalP-noTM
EFX00072	0.197	32	0.158	32	0.201	4	0.137	0.147	N	0.45	SignalP-noTM
EFX00545	0.106	68	0.104	68	0.116	65	0.1	0.102	N	0.45	SignalP-noTM
EFX00602	0.109	48	0.12	11	0.161	2	0.128	0.124	N	0.45	SignalP-noTM
EFX00269	0.113	24	0.118	45	0.161	34	0.121	0.119	N	0.45	SignalP-noTM
EFX00555	0.157	25	0.206	12	0.502	1	0.298	0.255	N	0.45	SignalP-noTM
EFX00433	0.115	36	0.105	36	0.118	54	0.092	0.098	N	0.45	SignalP-noTM
EFX00690	0.112	68	0.106	51	0.114	35	0.1	0.103	N	0.45	SignalP-noTM
EFX00653	0.108	65	0.114	11	0.138	1	0.111	0.112	N	0.45	SignalP-noTM
EFX00742	0.108	58	0.111	29	0.149	12	0.111	0.111	N	0.45	SignalP-noTM
EFX00573	0.192	49	0.16	23	0.217	45	0.135	0.147	N	0.45	SignalP-noTM
EFX00584	0.19	20	0.139	20	0.179	40	0.102	0.119	N	0.45	SignalP-noTM
EFX00084	0.134	20	0.136	20	0.188	19	0.145	0.14	N	0.5	SignalP-TM
EFX00614	0.226	18	0.173	18	0.183	25	0.125	0.147	N	0.45	SignalP-noTM
EFX00210	0.112	33	0.105	53	0.121	41	0.098	0.101	N	0.45	SignalP-noTM
EFX00479	0.261	20	0.441	20	0.885	3	0.726	0.595	Y	0.45	SignalP-noTM
EFX00648	0.11	68	0.108	12	0.122	1	0.101	0.104	N	0.45	SignalP-noTM
EFX00569	0.126	35	0.115	35	0.128	33	0.106	0.11	N	0.45	SignalP-noTM
EFX00380	0.159	24	0.15	24	0.22	6	0.155	0.152	N	0.5	SignalP-TM
EFX00036	0.111	55	0.108	55	0.12	9	0.101	0.104	N	0.45	SignalP-noTM
EFX00695	0.125	30	0.213	11	0.491	1	0.36	0.292	N	0.45	SignalP-noTM
EFX00229	0.117	10	0.108	39	0.117	23	0.099	0.104	N	0.45	SignalP-noTM
EFX00207	0.277	20	0.234	20	0.349	17	0.191	0.211	N	0.45	SignalP-noTM
EFX00311	0.231	25	0.161	25	0.208	23	0.112	0.135	N	0.45	SignalP-noTM
EFX00259	0.232	28	0.159	28	0.218	1	0.12	0.138	N	0.45	SignalP-noTM
EFX00082	0.11	52	0.109	65	0.126	1	0.1	0.104	N	0.45	SignalP-noTM
EFX00709	0.298	21	0.316	21	0.55	5	0.328	0.322	N	0.45	SignalP-noTM
EFX00655	0.111	31	0.111	38	0.123	27	0.103	0.106	N	0.45	SignalP-noTM
EFX00560	0.134	29	0.141	29	0.212	11	0.15	0.146	N	0.45	SignalP-noTM
EFX00589	0.11	58	0.107	58	0.125	28	0.103	0.105	N	0.45	SignalP-noTM
EFX00375	0.111	54	0.109	12	0.137	4	0.118	0.114	N	0.45	SignalP-noTM
EFX00203	0.16	48	0.145	11	0.244	1	0.149	0.147	N	0.45	SignalP-noTM
EFX00120	0.11	30	0.108	44	0.12	37	0.103	0.105	N	0.45	SignalP-noTM
EFX00401	0.109	17	0.104	46	0.108	25	0.096	0.1	N	0.45	SignalP-noTM
EFX00302	0.116	68	0.112	11	0.131	1	0.106	0.109	N	0.45	SignalP-noTM
EFX00058	0.111	60	0.118	11	0.146	6	0.13	0.124	N	0.45	SignalP-noTM
EFX00359	0.11	31	0.104	14	0.12	2	0.096	0.1	N	0.45	SignalP-noTM
EFX00613	0.135	30	0.122	12	0.171	1	0.116	0.119	N	0.45	SignalP-noTM
EFX00038	0.108	28	0.104	61	0.121	5	0.098	0.101	N	0.45	SignalP-noTM
EFX00136	0.112	59	0.107	59	0.111	27	0.098	0.102	N	0.45	SignalP-noTM
EFX00041	0.112	54	0.114	15	0.154	10	0.12	0.118	N	0.45	SignalP-noTM
EFX00101	0.109	68	0.104	68	0.11	21	0.096	0.1	N	0.45	SignalP-noTM
EFX00541	0.154	47	0.17	47	0.328	37	0.177	0.174	N	0.45	SignalP-noTM
EFX00637	0.161	24	0.217	24	0.496	4	0.298	0.261	N	0.45	SignalP-noTM
EFX00646	0.116	16	0.181	47	0.378	38	0.23	0.2	N	0.5	SignalP-TM
EFX00329	0.108	43	0.105	11	0.115	3	0.104	0.104	N	0.45	SignalP-noTM
EFX00746	0.171	41	0.215	41	0.513	35	0.27	0.244	N	0.45	SignalP-noTM
EFX00437	0.12	18	0.108	18	0.113	54	0.094	0.1	N	0.45	SignalP-noTM
EFX00496	0.15	18	0.16	18	0.353	16	0.179	0.17	N	0.45	SignalP-noTM
EFX00510	0.111	68	0.11	68	0.128	53	0.1	0.105	N	0.45	SignalP-noTM
EFX00182	0.111	68	0.104	68	0.11	22	0.098	0.101	N	0.45	SignalP-noTM
EFX00522	0.13	46	0.152	46	0.391	43	0.144	0.148	N	0.45	SignalP-noTM
EFX00246	0.122	31	0.108	31	0.11	41	0.094	0.101	N	0.45	SignalP-noTM
EFX00352	0.111	21	0.107	21	0.116	1	0.1	0.103	N	0.45	SignalP-noTM
EFX00621	0.171	48	0.155	23	0.236	22	0.166	0.161	N	0.45	SignalP-noTM
EFX00324	0.195	32	0.153	32	0.223	4	0.131	0.141	N	0.45	SignalP-noTM
EFX00564	0.218	50	0.158	50	0.246	48	0.098	0.134	N	0.5	SignalP-TM
EFX00557	0.11	39	0.103	39	0.11	2	0.095	0.099	N	0.45	SignalP-noTM
EFX00327	0.119	40	0.109	40	0.12	38	0.097	0.103	N	0.45	SignalP-noTM
EFX00460	0.121	64	0.146	12	0.241	1	0.166	0.157	N	0.45	SignalP-noTM
EFX00262	0.11	51	0.11	14	0.126	13	0.113	0.112	N	0.45	SignalP-noTM
EFX00299	0.157	48	0.124	48	0.116	42	0.094	0.108	N	0.45	SignalP-noTM
EFX00599	0.69	30	0.755	30	0.897	13	0.812	0.786	Y	0.45	SignalP-noTM
EFX00322	0.112	47	0.109	47	0.119	32	0.099	0.103	N	0.45	SignalP-noTM
EFX00678	0.136	21	0.13	21	0.157	20	0.124	0.127	N	0.45	SignalP-noTM
EFX00578	0.171	41	0.15	16	0.199	1	0.162	0.156	N	0.45	SignalP-noTM
EFX00556	0.109	22	0.125	12	0.169	1	0.128	0.127	N	0.45	SignalP-noTM
EFX00663	0.109	54	0.107	13	0.14	12	0.109	0.108	N	0.45	SignalP-noTM
EFX00447	0.172	22	0.135	22	0.14	20	0.106	0.119	N	0.45	SignalP-noTM
EFX00738	0.114	32	0.159	11	0.312	4	0.216	0.19	N	0.45	SignalP-noTM
EFX00126	0.158	17	0.169	17	0.295	15	0.185	0.177	N	0.45	SignalP-noTM
EFX00638	0.129	41	0.116	41	0.141	38	0.105	0.11	N	0.45	SignalP-noTM
EFX00133	0.107	54	0.108	14	0.118	5	0.11	0.109	N	0.45	SignalP-noTM
EFX00423	0.339	21	0.465	21	0.84	1	0.616	0.546	Y	0.45	SignalP-noTM
EFX00040	0.108	44	0.104	68	0.108	61	0.096	0.099	N	0.45	SignalP-noTM
EFX00707	0.11	70	0.105	70	0.111	51	0.096	0.1	N	0.45	SignalP-noTM
EFX00125	0.14	30	0.126	30	0.158	38	0.118	0.121	N	0.45	SignalP-noTM
EFX00261	0.128	67	0.113	67	0.133	44	0.105	0.108	N	0.45	SignalP-noTM
EFX00575	0.125	59	0.109	59	0.116	64	0.096	0.102	N	0.45	SignalP-noTM
EFX00463	0.111	59	0.107	59	0.126	42	0.1	0.104	N	0.45	SignalP-noTM
EFX00376	0.111	66	0.107	12	0.137	3	0.115	0.111	N	0.45	SignalP-noTM
EFX00512	0.252	25	0.195	25	0.408	1	0.169	0.181	N	0.45	SignalP-noTM
EFX00197	0.11	11	0.128	11	0.174	1	0.117	0.122	N	0.45	SignalP-noTM
EFX00090	0.109	46	0.11	21	0.133	13	0.111	0.111	N	0.45	SignalP-noTM
EFX00287	0.117	49	0.105	49	0.113	3	0.094	0.099	N	0.45	SignalP-noTM
EFX00397	0.171	19	0.26	19	0.505	1	0.371	0.32	N	0.45	SignalP-noTM
EFX00223	0.16	18	0.186	18	0.372	26	0.211	0.199	N	0.45	SignalP-noTM
EFX00481	0.112	59	0.109	49	0.12	43	0.105	0.107	N	0.45	SignalP-noTM
EFX00591	0.118	52	0.112	52	0.133	48	0.104	0.108	N	0.45	SignalP-noTM
EFX00676	0.146	45	0.119	12	0.165	5	0.129	0.124	N	0.45	SignalP-noTM
EFX00509	0.116	53	0.11	53	0.116	56	0.096	0.103	N	0.45	SignalP-noTM
EFX00183	0.122	42	0.112	42	0.116	13	0.1	0.105	N	0.45	SignalP-noTM
EFX00716	0.12	38	0.108	38	0.124	36	0.098	0.102	N	0.45	SignalP-noTM
EFX00306	0.111	54	0.107	11	0.117	1	0.103	0.105	N	0.45	SignalP-noTM
EFX00565	0.113	17	0.113	52	0.127	40	0.105	0.109	N	0.45	SignalP-noTM
EFX00078	0.116	50	0.108	50	0.131	44	0.098	0.102	N	0.45	SignalP-noTM
EFX01688	0.549	24	0.65	24	0.893	23	0.77	0.715	Y	0.45	SignalP-noTM
EFX01839	0.227	38	0.226	38	0.361	35	0.211	0.218	N	0.45	SignalP-noTM
EFX01567	0.158	25	0.137	25	0.175	24	0.118	0.126	N	0.45	SignalP-noTM
EFX01755	0.113	43	0.109	60	0.14	44	0.1	0.104	N	0.45	SignalP-noTM
EFX01754	0.106	68	0.112	68	0.138	60	0.101	0.108	N	0.5	SignalP-TM
EFX01844	0.495	23	0.568	23	0.83	16	0.65	0.612	Y	0.45	SignalP-noTM
EFX01782	0.617	20	0.759	20	0.969	10	0.929	0.851	Y	0.45	SignalP-noTM
EFX01581	0.113	40	0.102	69	0.113	24	0.086	0.095	N	0.5	SignalP-TM
EFX01570	0.142	25	0.154	25	0.275	20	0.169	0.162	N	0.45	SignalP-noTM
EFX01572	0.116	18	0.121	18	0.173	16	0.128	0.125	N	0.45	SignalP-noTM
EFX01691	0.114	26	0.111	69	0.152	59	0.09	0.102	N	0.5	SignalP-TM
EFX01657	0.189	47	0.209	16	0.318	9	0.252	0.226	N	0.5	SignalP-TM
EFX01700	0.137	17	0.117	17	0.136	33	0.1	0.108	N	0.45	SignalP-noTM
EFX01801	0.181	42	0.138	42	0.158	39	0.107	0.121	N	0.45	SignalP-noTM
EFX01774	0.137	44	0.117	44	0.123	48	0.1	0.108	N	0.45	SignalP-noTM
EFX01720	0.115	23	0.111	40	0.126	30	0.1	0.105	N	0.45	SignalP-noTM
EFX01566	0.116	21	0.121	21	0.18	5	0.124	0.123	N	0.45	SignalP-noTM
EFX01840	0.637	21	0.739	21	0.926	15	0.86	0.804	Y	0.45	SignalP-noTM
EFX01624	0.112	47	0.104	64	0.112	50	0.095	0.1	N	0.45	SignalP-noTM
EFX01646	0.115	25	0.114	12	0.151	2	0.111	0.112	N	0.45	SignalP-noTM
EFX01637	0.396	25	0.35	25	0.531	4	0.359	0.354	N	0.5	SignalP-TM
EFX01819	0.112	33	0.108	48	0.118	1	0.101	0.104	N	0.45	SignalP-noTM
EFX01582	0.15	29	0.121	29	0.172	42	0.101	0.11	N	0.45	SignalP-noTM
EFX01615	0.125	35	0.113	35	0.126	3	0.104	0.108	N	0.45	SignalP-noTM
EFX01652	0.111	57	0.106	57	0.113	38	0.096	0.1	N	0.45	SignalP-noTM
EFX01834	0.152	38	0.174	38	0.315	35	0.188	0.182	N	0.45	SignalP-noTM
EFX01771	0.109	29	0.106	29	0.122	11	0.101	0.103	N	0.45	SignalP-noTM
EFX01790	0.295	23	0.252	23	0.337	19	0.24	0.247	N	0.5	SignalP-TM
EFX01803	0.162	30	0.118	15	0.192	9	0.131	0.123	N	0.5	SignalP-TM
EFX01669	0.131	64	0.117	12	0.161	13	0.117	0.117	N	0.45	SignalP-noTM
EFX01765	0.173	20	0.221	20	0.457	15	0.288	0.257	N	0.45	SignalP-noTM
EFX01725	0.109	11	0.146	11	0.221	4	0.174	0.161	N	0.45	SignalP-noTM
EFX01705	0.137	23	0.228	11	0.588	3	0.438	0.341	N	0.45	SignalP-noTM
EFX01583	0.125	25	0.111	13	0.129	29	0.108	0.11	N	0.45	SignalP-noTM
EFX01785	0.214	25	0.202	25	0.299	23	0.19	0.195	N	0.45	SignalP-noTM
EFX01600	0.727	19	0.826	19	0.967	14	0.937	0.886	Y	0.45	SignalP-noTM
EFX01831	0.134	19	0.136	46	0.284	41	0.14	0.138	N	0.45	SignalP-noTM
EFX01772	0.107	23	0.112	40	0.148	38	0.108	0.11	N	0.5	SignalP-TM
EFX01697	0.114	30	0.104	67	0.111	53	0.097	0.1	N	0.45	SignalP-noTM
EFX01597	0.111	61	0.106	12	0.113	38	0.105	0.105	N	0.45	SignalP-noTM
EFX01792	0.223	28	0.165	28	0.165	26	0.124	0.143	N	0.45	SignalP-noTM
EFX01588	0.146	56	0.127	56	0.179	42	0.108	0.12	N	0.5	SignalP-TM
EFX01690	0.11	19	0.106	16	0.128	2	0.097	0.101	N	0.45	SignalP-noTM
EFX01746	0.11	46	0.108	26	0.125	7	0.107	0.108	N	0.45	SignalP-noTM
EFX01843	0.12	58	0.111	58	0.127	49	0.103	0.106	N	0.45	SignalP-noTM
EFX01632	0.176	44	0.199	44	0.41	40	0.144	0.177	N	0.5	SignalP-TM
EFX01648	0.131	50	0.119	50	0.18	49	0.103	0.11	N	0.45	SignalP-noTM
EFX01721	0.11	20	0.115	56	0.135	45	0.107	0.11	N	0.45	SignalP-noTM
EFX01625	0.11	46	0.106	38	0.114	63	0.1	0.103	N	0.45	SignalP-noTM
EFX01681	0.148	20	0.116	20	0.113	28	0.091	0.103	N	0.45	SignalP-noTM
EFX01830	0.672	43	0.751	43	0.965	35	0.586	0.662	Y	0.45	SignalP-noTM
EFX01748	0.125	36	0.126	36	0.208	32	0.121	0.123	N	0.45	SignalP-noTM
EFX01692	0.111	39	0.161	11	0.369	2	0.216	0.19	N	0.45	SignalP-noTM
EFX01592	0.207	23	0.166	23	0.218	19	0.133	0.148	N	0.45	SignalP-noTM
EFX01636	0.111	14	0.115	27	0.176	12	0.118	0.116	N	0.45	SignalP-noTM
EFX01805	0.147	21	0.119	21	0.112	25	0.096	0.107	N	0.45	SignalP-noTM
EFX01623	0.258	20	0.188	20	0.216	2	0.127	0.155	N	0.45	SignalP-noTM
EFX01800	0.14	23	0.149	21	0.201	2	0.158	0.154	N	0.45	SignalP-noTM
EFX01734	0.244	33	0.181	33	0.201	31	0.126	0.159	N	0.5	SignalP-TM
EFX01828	0.11	64	0.105	30	0.108	14	0.1	0.102	N	0.45	SignalP-noTM
EFX01619	0.112	68	0.115	16	0.146	16	0.125	0.121	N	0.45	SignalP-noTM
EFX01722	0.113	54	0.112	11	0.135	1	0.1	0.106	N	0.45	SignalP-noTM
EFX01751	0.211	37	0.194	37	0.461	35	0.174	0.183	N	0.45	SignalP-noTM
EFX01685	0.109	21	0.112	21	0.13	16	0.115	0.114	N	0.45	SignalP-noTM
EFX01667	0.109	49	0.109	51	0.134	30	0.105	0.107	N	0.45	SignalP-noTM
EFX01596	0.177	45	0.181	45	0.258	41	0.161	0.17	N	0.45	SignalP-noTM
EFX01629	0.135	28	0.227	11	0.686	2	0.438	0.341	N	0.45	SignalP-noTM
EFX01820	0.108	57	0.109	51	0.119	48	0.102	0.105	N	0.45	SignalP-noTM
EFX01614	0.143	31	0.188	11	0.463	15	0.268	0.231	N	0.45	SignalP-noTM
EFX01841	0.112	42	0.105	11	0.114	55	0.103	0.104	N	0.45	SignalP-noTM
EFX01758	0.11	60	0.105	45	0.113	56	0.097	0.101	N	0.45	SignalP-noTM
EFX01737	0.111	68	0.105	68	0.117	22	0.097	0.101	N	0.45	SignalP-noTM
EFX01687	0.111	66	0.12	16	0.152	3	0.135	0.128	N	0.45	SignalP-noTM
EFX01620	0.129	23	0.154	11	0.266	1	0.196	0.177	N	0.45	SignalP-noTM
EFX01595	0.112	19	0.105	47	0.12	26	0.098	0.101	N	0.45	SignalP-noTM
EFX01680	0.124	18	0.142	11	0.227	3	0.149	0.146	N	0.45	SignalP-noTM
EFX01763	0.173	36	0.155	36	0.277	33	0.142	0.148	N	0.45	SignalP-noTM
EFX01659	0.109	55	0.105	42	0.114	25	0.097	0.101	N	0.45	SignalP-noTM
EFX01679	0.122	26	0.113	46	0.14	44	0.106	0.109	N	0.45	SignalP-noTM
EFX01813	0.533	18	0.522	18	0.803	16	0.541	0.532	Y	0.45	SignalP-noTM
EFX01799	0.11	37	0.111	37	0.129	19	0.109	0.11	N	0.45	SignalP-noTM
EFX01818	0.135	40	0.118	40	0.136	16	0.102	0.109	N	0.45	SignalP-noTM
EFX01719	0.112	7	0.105	70	0.115	10	0.098	0.101	N	0.45	SignalP-noTM
EFX01787	0.111	65	0.109	29	0.125	44	0.109	0.109	N	0.45	SignalP-noTM
EFX01661	0.119	29	0.137	11	0.231	2	0.152	0.145	N	0.45	SignalP-noTM
EFX01696	0.11	27	0.131	12	0.193	1	0.129	0.13	N	0.45	SignalP-noTM
EFX01633	0.112	61	0.106	46	0.115	13	0.103	0.104	N	0.45	SignalP-noTM
EFX01694	0.121	17	0.121	17	0.15	6	0.124	0.123	N	0.45	SignalP-noTM
EFX01780	0.142	17	0.11	17	0.117	42	0.089	0.099	N	0.45	SignalP-noTM
EFX01761	0.136	32	0.162	32	0.313	15	0.186	0.175	N	0.45	SignalP-noTM
EFX01749	0.147	29	0.192	29	0.318	28	0.222	0.204	N	0.5	SignalP-TM
EFX01708	0.472	20	0.676	20	0.99	11	0.967	0.833	Y	0.45	SignalP-noTM
EFX01594	0.137	23	0.165	12	0.331	2	0.192	0.179	N	0.45	SignalP-noTM
EFX01723	0.109	21	0.114	12	0.167	4	0.126	0.12	N	0.45	SignalP-noTM
EFX01711	0.166	32	0.211	32	0.55	26	0.287	0.252	N	0.45	SignalP-noTM
EFX01642	0.777	31	0.398	31	0.407	29	0.212	0.324	N	0.5	SignalP-TM
EFX01836	0.808	22	0.866	22	0.969	4	0.928	0.899	Y	0.45	SignalP-noTM
EFX01731	0.111	31	0.119	18	0.168	2	0.13	0.125	N	0.45	SignalP-noTM
EFX01662	0.124	19	0.111	19	0.116	1	0.095	0.102	N	0.45	SignalP-noTM
EFX01665	0.111	15	0.104	70	0.115	24	0.1	0.102	N	0.45	SignalP-noTM
EFX01638	0.131	40	0.137	23	0.201	6	0.15	0.144	N	0.45	SignalP-noTM
EFX01617	0.208	41	0.201	19	0.371	5	0.258	0.224	N	0.5	SignalP-TM
EFX01574	0.11	63	0.106	63	0.113	39	0.097	0.101	N	0.45	SignalP-noTM
EFX01580	0.126	47	0.114	12	0.152	11	0.12	0.116	N	0.5	SignalP-TM
EFX01641	0.113	31	0.111	31	0.131	13	0.107	0.109	N	0.45	SignalP-noTM
EFX01756	0.119	52	0.108	21	0.122	13	0.107	0.108	N	0.45	SignalP-noTM
EFX01810	0.109	34	0.106	70	0.116	24	0.1	0.103	N	0.45	SignalP-noTM
EFX01640	0.288	20	0.518	17	0.971	12	0.94	0.746	Y	0.45	SignalP-noTM
EFX01814	0.122	20	0.112	20	0.141	28	0.099	0.105	N	0.45	SignalP-noTM
EFX01571	0.11	53	0.11	14	0.148	12	0.113	0.112	N	0.45	SignalP-noTM
EFX01808	0.495	18	0.665	18	0.939	1	0.88	0.782	Y	0.45	SignalP-noTM
EFX01728	0.142	66	0.12	66	0.205	37	0.111	0.115	N	0.45	SignalP-noTM
EFX01783	0.114	30	0.103	63	0.117	1	0.095	0.099	N	0.45	SignalP-noTM
EFX01760	0.124	19	0.14	19	0.187	16	0.151	0.146	N	0.45	SignalP-noTM
EFX01598	0.116	24	0.118	11	0.155	1	0.107	0.112	N	0.45	SignalP-noTM
EFX01778	0.128	40	0.116	40	0.125	13	0.105	0.11	N	0.45	SignalP-noTM
EFX01791	0.109	49	0.106	25	0.116	3	0.103	0.104	N	0.45	SignalP-noTM
EFX01578	0.11	62	0.104	38	0.112	28	0.096	0.1	N	0.45	SignalP-noTM
EFX01741	0.109	65	0.105	65	0.112	49	0.096	0.1	N	0.45	SignalP-noTM
EFX01707	0.113	20	0.12	20	0.151	7	0.126	0.123	N	0.45	SignalP-noTM
EFX01776	0.137	52	0.154	24	0.256	11	0.188	0.168	N	0.5	SignalP-TM
EFX01795	0.123	18	0.123	18	0.163	1	0.11	0.116	N	0.45	SignalP-noTM
EFX01710	0.11	39	0.115	12	0.14	1	0.116	0.116	N	0.45	SignalP-noTM
EFX01699	0.109	47	0.126	13	0.181	9	0.149	0.135	N	0.5	SignalP-TM
EFX01712	0.739	24	0.81	24	0.936	9	0.889	0.852	Y	0.45	SignalP-noTM
EFX01630	0.121	21	0.11	48	0.118	30	0.104	0.107	N	0.45	SignalP-noTM
EFX01702	0.107	58	0.106	70	0.113	57	0.1	0.103	N	0.45	SignalP-noTM
EFX01835	0.323	23	0.458	23	0.875	1	0.649	0.561	Y	0.45	SignalP-noTM
EFX01575	0.223	20	0.153	20	0.144	17	0.108	0.128	N	0.45	SignalP-noTM
EFX01769	0.144	38	0.161	38	0.364	34	0.157	0.159	N	0.45	SignalP-noTM
EFX01670	0.112	27	0.106	69	0.119	51	0.098	0.102	N	0.45	SignalP-noTM
EFX01743	0.111	65	0.107	48	0.126	28	0.098	0.102	N	0.45	SignalP-noTM
EFX01826	0.111	31	0.113	17	0.139	12	0.122	0.118	N	0.45	SignalP-noTM
EFX01608	0.129	21	0.111	21	0.116	2	0.094	0.102	N	0.45	SignalP-noTM
EFX01812	0.199	28	0.14	28	0.151	1	0.105	0.121	N	0.45	SignalP-noTM
EFX01802	0.143	31	0.121	31	0.141	4	0.107	0.114	N	0.45	SignalP-noTM
EFX01744	0.181	30	0.199	30	0.344	25	0.218	0.209	N	0.45	SignalP-noTM
EFX01727	0.11	22	0.106	38	0.114	24	0.099	0.102	N	0.45	SignalP-noTM
EFX01753	0.162	38	0.228	34	0.524	20	0.31	0.261	N	0.5	SignalP-TM
EFX01757	0.11	45	0.127	11	0.171	1	0.127	0.127	N	0.45	SignalP-noTM
EFX01651	0.111	32	0.106	32	0.115	1	0.1	0.103	N	0.45	SignalP-noTM
EFX01709	0.114	39	0.111	57	0.135	52	0.102	0.106	N	0.45	SignalP-noTM
EFX01573	0.131	21	0.12	21	0.127	55	0.109	0.114	N	0.45	SignalP-noTM
EFX01584	0.268	21	0.166	21	0.125	36	0.102	0.131	N	0.45	SignalP-noTM
EFX01786	0.139	20	0.119	59	0.194	47	0.115	0.117	N	0.45	SignalP-noTM
EFX01759	0.185	18	0.136	18	0.135	17	0.1	0.117	N	0.45	SignalP-noTM
EFX01682	0.123	22	0.114	22	0.121	22	0.105	0.109	N	0.45	SignalP-noTM
EFX01770	0.134	18	0.122	18	0.149	16	0.111	0.116	N	0.45	SignalP-noTM
EFX01605	0.229	43	0.154	43	0.161	39	0.104	0.127	N	0.45	SignalP-noTM
EFX01698	0.228	18	0.303	18	0.509	2	0.401	0.356	N	0.45	SignalP-noTM
EFX01565	0.163	29	0.13	29	0.143	32	0.109	0.119	N	0.45	SignalP-noTM
EFX01704	0.118	19	0.149	17	0.268	9	0.196	0.175	N	0.45	SignalP-noTM
EFX01576	0.113	64	0.11	64	0.127	27	0.102	0.106	N	0.45	SignalP-noTM
EFX01821	0.127	37	0.136	48	0.228	45	0.153	0.145	N	0.45	SignalP-noTM
EFX01806	0.317	20	0.51	20	0.893	12	0.817	0.675	Y	0.45	SignalP-noTM
EFX01672	0.106	52	0.104	66	0.13	5	0.098	0.101	N	0.45	SignalP-noTM
EFX01610	0.16	43	0.137	43	0.146	31	0.111	0.126	N	0.5	SignalP-TM
EFX01653	0.112	39	0.103	67	0.106	33	0.094	0.098	N	0.45	SignalP-noTM
EFX01599	0.129	17	0.141	17	0.186	15	0.151	0.146	N	0.45	SignalP-noTM
EFX01613	0.253	41	0.173	41	0.251	40	0.107	0.138	N	0.45	SignalP-noTM
EFX01794	0.129	25	0.174	11	0.38	1	0.229	0.204	N	0.45	SignalP-noTM
EFX01845	0.11	34	0.11	11	0.127	10	0.111	0.11	N	0.45	SignalP-noTM
EFX01689	0.121	40	0.114	40	0.15	34	0.108	0.111	N	0.45	SignalP-noTM
EFX01764	0.544	22	0.512	22	0.804	15	0.482	0.495	Y	0.45	SignalP-noTM
EFX01750	0.111	36	0.107	36	0.121	32	0.096	0.101	N	0.45	SignalP-noTM
EFX01701	0.123	31	0.115	11	0.134	1	0.119	0.117	N	0.45	SignalP-noTM
EFX01815	0.115	25	0.104	40	0.106	60	0.094	0.099	N	0.45	SignalP-noTM
EFX01593	0.161	17	0.15	17	0.229	2	0.133	0.141	N	0.45	SignalP-noTM
EFX01686	0.248	22	0.276	22	0.413	17	0.304	0.291	N	0.45	SignalP-noTM
EFX01784	0.11	51	0.105	30	0.115	24	0.102	0.104	N	0.45	SignalP-noTM
EFX01627	0.111	33	0.112	16	0.146	13	0.12	0.116	N	0.45	SignalP-noTM
EFX01634	0.113	55	0.109	55	0.123	44	0.099	0.104	N	0.45	SignalP-noTM
EFX01832	0.125	17	0.121	17	0.144	27	0.12	0.121	N	0.5	SignalP-TM
EFX01713	0.191	16	0.193	16	0.242	1	0.172	0.182	N	0.45	SignalP-noTM
EFX01824	0.168	32	0.13	32	0.136	6	0.104	0.116	N	0.45	SignalP-noTM
EFX01779	0.128	41	0.124	11	0.164	14	0.136	0.131	N	0.45	SignalP-noTM
EFX01718	0.108	25	0.102	59	0.107	39	0.094	0.098	N	0.45	SignalP-noTM
EFX01644	0.109	34	0.105	34	0.116	1	0.101	0.103	N	0.45	SignalP-noTM
EFX01706	0.184	46	0.133	46	0.149	45	0.098	0.114	N	0.45	SignalP-noTM
EFX01602	0.109	35	0.107	64	0.125	25	0.1	0.103	N	0.45	SignalP-noTM
EFX01671	0.113	24	0.119	11	0.155	1	0.119	0.119	N	0.45	SignalP-noTM
EFX01649	0.116	32	0.117	17	0.184	31	0.118	0.118	N	0.45	SignalP-noTM
EFX01589	0.11	22	0.105	36	0.124	31	0.098	0.101	N	0.45	SignalP-noTM
EFX01714	0.118	38	0.114	59	0.17	39	0.105	0.109	N	0.45	SignalP-noTM
EFX01747	0.109	29	0.118	49	0.357	43	0.115	0.116	N	0.45	SignalP-noTM
EFX01606	0.138	16	0.191	16	0.383	14	0.268	0.233	N	0.45	SignalP-noTM
EFX01639	0.125	23	0.113	23	0.16	20	0.103	0.108	N	0.45	SignalP-noTM
EFX01603	0.183	20	0.138	20	0.165	47	0.107	0.121	N	0.45	SignalP-noTM
EFX01822	0.112	52	0.109	52	0.124	56	0.102	0.105	N	0.45	SignalP-noTM
EFX01838	0.113	29	0.103	13	0.113	3	0.096	0.099	N	0.45	SignalP-noTM
EFX01775	0.15	55	0.189	55	0.34	50	0.15	0.173	N	0.5	SignalP-TM
EFX01781	0.126	21	0.116	21	0.125	1	0.104	0.109	N	0.45	SignalP-noTM
EFX01675	0.109	58	0.107	24	0.135	2	0.107	0.107	N	0.45	SignalP-noTM
EFX01568	0.124	50	0.112	50	0.17	48	0.101	0.106	N	0.45	SignalP-noTM
EFX01762	0.68	22	0.767	22	0.944	4	0.861	0.818	Y	0.45	SignalP-noTM
EFX01738	0.109	41	0.111	15	0.127	3	0.111	0.111	N	0.45	SignalP-noTM
EFX01666	0.136	45	0.106	30	0.153	2	0.101	0.104	N	0.5	SignalP-TM
EFX01715	0.242	41	0.179	41	0.189	40	0.123	0.149	N	0.45	SignalP-noTM
EFX01587	0.107	49	0.104	63	0.115	56	0.097	0.1	N	0.45	SignalP-noTM
EFX01732	0.115	36	0.108	12	0.151	40	0.109	0.108	N	0.45	SignalP-noTM
EFX01658	0.111	59	0.105	70	0.112	23	0.097	0.101	N	0.45	SignalP-noTM
EFX01618	0.11	41	0.125	41	0.221	21	0.134	0.13	N	0.45	SignalP-noTM
EFX01797	0.122	44	0.111	44	0.128	40	0.096	0.103	N	0.45	SignalP-noTM
EFX01726	0.123	21	0.128	21	0.289	49	0.135	0.132	N	0.45	SignalP-noTM
EFX01664	0.118	18	0.11	18	0.123	6	0.099	0.104	N	0.45	SignalP-noTM
EFX01693	0.152	19	0.17	19	0.264	1	0.175	0.173	N	0.45	SignalP-noTM
EFX01817	0.144	33	0.13	11	0.217	2	0.14	0.136	N	0.45	SignalP-noTM
EFX01730	0.108	11	0.105	46	0.109	27	0.095	0.099	N	0.45	SignalP-noTM
EFX01591	0.357	26	0.545	26	0.952	5	0.832	0.7	Y	0.45	SignalP-noTM
EFX01643	0.11	42	0.107	67	0.117	64	0.097	0.101	N	0.45	SignalP-noTM
EFX01724	0.11	42	0.132	25	0.245	3	0.164	0.149	N	0.45	SignalP-noTM
EFX01716	0.123	48	0.182	21	0.44	15	0.296	0.243	N	0.45	SignalP-noTM
EFX01621	0.111	34	0.111	12	0.133	5	0.114	0.113	N	0.45	SignalP-noTM
EFX01809	0.176	39	0.173	22	0.411	14	0.242	0.201	N	0.5	SignalP-TM
EFX01586	0.597	20	0.599	20	0.706	5	0.598	0.599	Y	0.45	SignalP-noTM
EFX01611	0.119	46	0.154	46	0.346	43	0.176	0.166	N	0.45	SignalP-noTM
EFX01569	0.114	28	0.104	28	0.109	57	0.096	0.1	N	0.45	SignalP-noTM
EFX01777	0.166	22	0.135	22	0.157	35	0.111	0.122	N	0.45	SignalP-noTM
EFX01656	0.115	26	0.149	11	0.252	1	0.159	0.154	N	0.45	SignalP-noTM
EFX01645	0.241	18	0.178	18	0.178	2	0.122	0.148	N	0.45	SignalP-noTM
EFX01622	0.16	29	0.133	29	0.148	6	0.116	0.123	N	0.45	SignalP-noTM
EFX01745	0.114	26	0.125	16	0.227	13	0.134	0.13	N	0.45	SignalP-noTM
EFX01837	0.129	58	0.106	30	0.141	42	0.092	0.101	N	0.5	SignalP-TM
EFX01816	0.196	21	0.135	21	0.129	48	0.094	0.113	N	0.45	SignalP-noTM
EFX01655	0.109	26	0.106	41	0.117	36	0.099	0.102	N	0.45	SignalP-noTM
EFX01683	0.112	17	0.108	53	0.123	38	0.097	0.102	N	0.45	SignalP-noTM
EFX01577	0.116	26	0.108	26	0.131	50	0.099	0.104	N	0.45	SignalP-noTM
EFX01676	0.37	22	0.442	22	0.766	1	0.517	0.483	Y	0.45	SignalP-noTM
EFX01752	0.137	37	0.17	37	0.314	19	0.195	0.184	N	0.45	SignalP-noTM
EFX01674	0.131	19	0.114	19	0.146	49	0.099	0.106	N	0.45	SignalP-noTM
EFX01585	0.114	70	0.112	70	0.139	50	0.101	0.106	N	0.45	SignalP-noTM
EFX01601	0.115	17	0.108	57	0.12	53	0.099	0.103	N	0.45	SignalP-noTM
EFX01766	0.318	26	0.207	26	0.398	1	0.209	0.208	N	0.5	SignalP-TM
EFX01703	0.11	12	0.109	54	0.152	37	0.099	0.104	N	0.45	SignalP-noTM
EFX01807	0.113	40	0.106	40	0.121	45	0.096	0.101	N	0.45	SignalP-noTM
EFX01825	0.141	40	0.133	40	0.221	34	0.125	0.129	N	0.45	SignalP-noTM
EFX01804	0.11	65	0.148	12	0.256	2	0.165	0.157	N	0.45	SignalP-noTM
EFX01796	0.108	18	0.105	18	0.109	3	0.103	0.104	N	0.45	SignalP-noTM
EFX01650	0.116	55	0.162	55	0.291	45	0.141	0.153	N	0.5	SignalP-TM
EFX01829	0.114	27	0.113	27	0.142	3	0.114	0.113	N	0.45	SignalP-noTM
EFX01607	0.111	23	0.108	53	0.127	52	0.1	0.103	N	0.45	SignalP-noTM
EFX01612	0.354	41	0.344	41	0.487	37	0.264	0.301	N	0.45	SignalP-noTM
EFX01736	0.426	18	0.591	18	0.888	3	0.822	0.716	Y	0.45	SignalP-noTM
EFX01695	0.161	35	0.134	11	0.21	1	0.134	0.134	N	0.45	SignalP-noTM
EFX01604	0.158	22	0.166	22	0.552	30	0.173	0.17	N	0.45	SignalP-noTM
EFX01823	0.115	69	0.127	11	0.173	1	0.119	0.123	N	0.45	SignalP-noTM
EFX01742	0.144	66	0.125	43	0.153	21	0.115	0.12	N	0.45	SignalP-noTM
EFX01654	0.109	54	0.107	36	0.119	21	0.1	0.103	N	0.45	SignalP-noTM
EFX01767	0.175	21	0.202	21	0.396	1	0.216	0.209	N	0.45	SignalP-noTM
EFX01678	0.109	41	0.115	55	0.193	35	0.109	0.111	N	0.45	SignalP-noTM
EFX01626	0.125	21	0.13	21	0.181	16	0.136	0.133	N	0.45	SignalP-noTM
EFX01735	0.167	41	0.126	41	0.116	14	0.097	0.111	N	0.45	SignalP-noTM
EFX01663	0.139	35	0.135	20	0.24	2	0.144	0.14	N	0.45	SignalP-noTM
EFX01788	0.108	37	0.108	12	0.122	1	0.105	0.106	N	0.45	SignalP-noTM
EFX01590	0.122	28	0.174	11	0.335	1	0.2	0.188	N	0.45	SignalP-noTM
EFX01668	0.112	21	0.208	21	0.511	4	0.393	0.308	N	0.45	SignalP-noTM
EFX01773	0.131	31	0.116	31	0.121	22	0.103	0.109	N	0.45	SignalP-noTM
EFX01842	0.126	17	0.122	17	0.143	3	0.111	0.116	N	0.45	SignalP-noTM
EFX01673	0.118	17	0.108	63	0.134	44	0.098	0.102	N	0.45	SignalP-noTM
EFX01635	0.109	56	0.107	11	0.119	2	0.099	0.103	N	0.45	SignalP-noTM
EFX01684	0.108	34	0.106	12	0.117	1	0.099	0.102	N	0.45	SignalP-noTM
EFX01631	0.133	33	0.176	27	0.406	25	0.244	0.213	N	0.45	SignalP-noTM
EFX01789	0.11	67	0.138	11	0.286	41	0.165	0.152	N	0.45	SignalP-noTM
EFX01729	0.2	39	0.166	39	0.221	30	0.14	0.152	N	0.45	SignalP-noTM
EFX01717	0.107	23	0.101	70	0.109	55	0.093	0.097	N	0.45	SignalP-noTM
EFX01827	0.107	54	0.107	37	0.12	33	0.101	0.104	N	0.45	SignalP-noTM
EFX01609	0.251	69	0.161	69	0.16	12	0.117	0.137	N	0.45	SignalP-noTM
EFX01647	0.159	23	0.248	23	0.479	10	0.387	0.323	N	0.45	SignalP-noTM
EFX01811	0.169	18	0.137	18	0.138	5	0.111	0.123	N	0.45	SignalP-noTM
EFX01798	0.114	22	0.116	22	0.142	2	0.118	0.117	N	0.45	SignalP-noTM
EFX01733	0.131	18	0.173	18	0.327	2	0.22	0.198	N	0.45	SignalP-noTM
EFX01660	0.109	53	0.109	36	0.121	14	0.107	0.108	N	0.45	SignalP-noTM
EFX01768	0.111	36	0.105	36	0.114	47	0.093	0.098	N	0.45	SignalP-noTM
EFX01579	0.17	27	0.219	27	0.364	24	0.266	0.244	N	0.45	SignalP-noTM
EFX01833	0.142	34	0.12	34	0.154	5	0.108	0.114	N	0.45	SignalP-noTM
EFX01628	0.418	21	0.409	21	0.661	2	0.377	0.392	N	0.45	SignalP-noTM
EFX01616	0.114	55	0.113	66	0.157	19	0.093	0.105	N	0.5	SignalP-TM
EFX01740	0.273	53	0.248	53	0.349	47	0.15	0.195	N	0.45	SignalP-noTM
EFX01677	0.11	35	0.105	35	0.111	24	0.097	0.101	N	0.45	SignalP-noTM
EFX01793	0.183	49	0.15	49	0.167	48	0.111	0.129	N	0.45	SignalP-noTM
EFX01739	0.116	35	0.109	12	0.137	47	0.106	0.108	N	0.45	SignalP-noTM
EFW99666	0.149	15	0.312	15	0.842	13	0.68	0.511	Y	0.45	SignalP-noTM
EFW99670	0.112	28	0.13	11	0.18	1	0.126	0.128	N	0.45	SignalP-noTM
EFW99665	0.108	19	0.11	19	0.15	5	0.112	0.111	N	0.45	SignalP-noTM
EFW99659	0.135	37	0.133	12	0.199	2	0.131	0.132	N	0.45	SignalP-noTM
EFW99662	0.119	44	0.116	12	0.186	6	0.137	0.128	N	0.45	SignalP-noTM
EFW99664	0.11	30	0.109	42	0.12	26	0.101	0.104	N	0.45	SignalP-noTM
EFW99671	0.173	49	0.13	12	0.19	1	0.132	0.131	N	0.45	SignalP-noTM
EFW99667	0.111	26	0.183	20	0.524	5	0.33	0.262	N	0.45	SignalP-noTM
EFW99669	0.169	26	0.128	26	0.134	1	0.1	0.113	N	0.45	SignalP-noTM
EFW99663	0.186	22	0.146	22	0.183	1	0.111	0.127	N	0.45	SignalP-noTM
EFW99660	0.119	51	0.111	70	0.157	58	0.097	0.105	N	0.5	SignalP-TM
EFW99658	0.109	23	0.108	45	0.121	30	0.103	0.105	N	0.45	SignalP-noTM
EFW99668	0.111	46	0.107	63	0.136	48	0.1	0.103	N	0.45	SignalP-noTM
EFW99657	0.139	33	0.116	33	0.137	32	0.099	0.107	N	0.45	SignalP-noTM
EFW99661	0.108	52	0.108	52	0.122	40	0.099	0.103	N	0.45	SignalP-noTM
EFW99673	0.14	18	0.203	17	0.381	12	0.289	0.237	N	0.5	SignalP-TM
EFX03383	0.138	61	0.135	61	0.209	46	0.112	0.123	N	0.45	SignalP-noTM
EFX03338	0.148	46	0.128	46	0.156	7	0.121	0.124	N	0.45	SignalP-noTM
EFX03405	0.121	24	0.122	24	0.151	23	0.122	0.122	N	0.45	SignalP-noTM
EFX03414	0.11	68	0.106	68	0.112	64	0.094	0.1	N	0.45	SignalP-noTM
EFX03351	0.111	40	0.112	40	0.141	29	0.11	0.111	N	0.45	SignalP-noTM
EFX03394	0.109	38	0.103	38	0.114	25	0.095	0.099	N	0.45	SignalP-noTM
EFX03417	0.151	20	0.159	20	0.273	1	0.149	0.154	N	0.45	SignalP-noTM
EFX03402	0.115	25	0.124	12	0.183	24	0.131	0.128	N	0.45	SignalP-noTM
EFX03400	0.11	47	0.107	64	0.123	25	0.098	0.102	N	0.45	SignalP-noTM
EFX03377	0.181	31	0.145	31	0.233	5	0.128	0.136	N	0.45	SignalP-noTM
EFX03374	0.149	37	0.121	37	0.146	36	0.095	0.107	N	0.45	SignalP-noTM
EFX03352	0.114	20	0.114	20	0.132	6	0.115	0.115	N	0.45	SignalP-noTM
EFX03369	0.205	23	0.346	23	0.755	17	0.583	0.474	Y	0.45	SignalP-noTM
EFX03344	0.118	22	0.105	70	0.115	55	0.097	0.101	N	0.45	SignalP-noTM
EFX03380	0.115	35	0.116	30	0.255	28	0.123	0.12	N	0.45	SignalP-noTM
EFX03403	0.142	31	0.114	31	0.137	1	0.095	0.103	N	0.45	SignalP-noTM
EFX03356	0.308	20	0.526	20	0.929	14	0.897	0.726	Y	0.45	SignalP-noTM
EFX03347	0.132	26	0.126	11	0.169	1	0.133	0.13	N	0.45	SignalP-noTM
EFX03397	0.354	49	0.191	11	0.432	3	0.367	0.261	N	0.5	SignalP-TM
EFX03363	0.199	16	0.223	16	0.504	13	0.271	0.249	N	0.45	SignalP-noTM
EFX03358	0.167	17	0.126	17	0.116	43	0.095	0.109	N	0.45	SignalP-noTM
EFX03360	0.111	31	0.112	38	0.127	27	0.107	0.11	N	0.45	SignalP-noTM
EFX03384	0.17	18	0.167	18	0.192	1	0.155	0.16	N	0.45	SignalP-noTM
EFX03393	0.112	66	0.107	58	0.119	41	0.099	0.103	N	0.45	SignalP-noTM
EFX03354	0.124	51	0.113	13	0.131	1	0.115	0.114	N	0.45	SignalP-noTM
EFX03355	0.177	30	0.225	19	0.487	1	0.331	0.283	N	0.45	SignalP-noTM
EFX03404	0.12	22	0.122	22	0.201	13	0.126	0.124	N	0.45	SignalP-noTM
EFX03366	0.109	26	0.108	15	0.138	11	0.108	0.108	N	0.45	SignalP-noTM
EFX03373	0.111	37	0.116	13	0.195	5	0.135	0.126	N	0.45	SignalP-noTM
EFX03372	0.115	28	0.13	12	0.197	1	0.132	0.131	N	0.45	SignalP-noTM
EFX03411	0.109	41	0.107	59	0.153	43	0.101	0.104	N	0.45	SignalP-noTM
EFX03391	0.109	21	0.109	16	0.126	1	0.104	0.106	N	0.45	SignalP-noTM
EFX03395	0.11	45	0.108	11	0.119	2	0.108	0.108	N	0.45	SignalP-noTM
EFX03399	0.128	47	0.151	22	0.452	15	0.194	0.174	N	0.45	SignalP-noTM
EFX03353	0.132	19	0.114	19	0.117	12	0.098	0.105	N	0.45	SignalP-noTM
EFX03390	0.139	23	0.121	23	0.133	44	0.106	0.113	N	0.45	SignalP-noTM
EFX03340	0.137	46	0.116	46	0.129	45	0.098	0.106	N	0.45	SignalP-noTM
EFX03343	0.111	41	0.128	12	0.177	2	0.142	0.136	N	0.45	SignalP-noTM
EFX03379	0.114	34	0.108	47	0.125	13	0.103	0.105	N	0.45	SignalP-noTM
EFX03398	0.155	17	0.115	17	0.125	16	0.09	0.105	N	0.5	SignalP-TM
EFX03371	0.155	51	0.125	12	0.161	1	0.127	0.126	N	0.45	SignalP-noTM
EFX03361	0.109	36	0.11	12	0.121	1	0.1	0.105	N	0.45	SignalP-noTM
EFX03357	0.113	53	0.106	53	0.118	24	0.099	0.102	N	0.45	SignalP-noTM
EFX03365	0.137	19	0.14	21	0.187	18	0.146	0.143	N	0.45	SignalP-noTM
EFX03413	0.111	43	0.108	43	0.116	35	0.096	0.102	N	0.45	SignalP-noTM
EFX03416	0.109	34	0.107	47	0.123	40	0.104	0.105	N	0.45	SignalP-noTM
EFX03367	0.123	20	0.121	20	0.16	6	0.116	0.118	N	0.45	SignalP-noTM
EFX03378	0.125	16	0.154	16	0.256	6	0.192	0.175	N	0.45	SignalP-noTM
EFX03408	0.124	45	0.11	67	0.121	55	0.096	0.102	N	0.45	SignalP-noTM
EFX03359	0.124	37	0.131	16	0.171	1	0.132	0.131	N	0.45	SignalP-noTM
EFX03382	0.114	52	0.117	52	0.232	48	0.103	0.11	N	0.45	SignalP-noTM
EFX03364	0.112	47	0.114	14	0.143	3	0.109	0.111	N	0.45	SignalP-noTM
EFX03385	0.132	20	0.139	20	0.336	18	0.152	0.146	N	0.45	SignalP-noTM
EFX03342	0.542	25	0.656	25	0.932	15	0.797	0.732	Y	0.45	SignalP-noTM
EFX03348	0.112	38	0.13	12	0.178	2	0.153	0.143	N	0.45	SignalP-noTM
EFX03350	0.136	53	0.126	53	0.198	50	0.106	0.115	N	0.45	SignalP-noTM
EFX03345	0.402	31	0.275	31	0.446	1	0.234	0.253	N	0.45	SignalP-noTM
EFX03337	0.108	32	0.104	45	0.112	29	0.095	0.099	N	0.45	SignalP-noTM
EFX03410	0.732	23	0.807	23	0.948	14	0.889	0.851	Y	0.45	SignalP-noTM
EFX03339	0.107	57	0.107	29	0.118	21	0.096	0.103	N	0.5	SignalP-TM
EFX03349	0.116	21	0.109	39	0.146	33	0.105	0.107	N	0.45	SignalP-noTM
EFX03406	0.153	46	0.131	46	0.147	42	0.105	0.117	N	0.45	SignalP-noTM
EFX03407	0.163	16	0.175	16	0.248	3	0.184	0.18	N	0.45	SignalP-noTM
[truncated: 6,314 more rows]
