# Supplementary material for: De novo genome assembly of Geosmithia morbida, the causal agent of thousand cankers disease
Source: PeerJ. 2016 May 2;4:e1952. doi: 10.7717/peerj.1952 (PMC4860301; doi:10.7717/peerj.1952)
Supplement: Supplemental Information 6 [file peerj-04-1952-s006.xlsx]

## Sheet: Sheet1
# SignalP-4.1 euk predictions
name Cmax pos Ymax pos Smax pos Smean D ? Dmaxcut Networks-used
NechaP56807	0.632	19	0.751	19	0.929	10	0.892	0.827	Y	0.45	SignalP-noTM
NechaP56811	0.132	59	0.237	19	0.646	1	0.48	0.334	N	0.5	SignalP-TM
NechaP89554	0.115	42	0.106	69	0.116	52	0.096	0.101	N	0.45	SignalP-noTM
NechaP56797	0.113	58	0.109	52	0.12	33	0.101	0.105	N	0.45	SignalP-noTM
NechaP89556	0.108	52	0.109	47	0.124	28	0.101	0.105	N	0.45	SignalP-noTM
NechaP89557	0.118	38	0.112	38	0.128	35	0.101	0.106	N	0.45	SignalP-noTM
NechaP65036	0.119	35	0.118	11	0.143	33	0.13	0.125	N	0.45	SignalP-noTM
NechaP89559	0.197	33	0.157	44	0.274	38	0.176	0.165	N	0.5	SignalP-TM
NechaP56801	0.153	33	0.138	33	0.244	31	0.116	0.126	N	0.45	SignalP-noTM
NechaP89560	0.108	48	0.112	11	0.136	22	0.119	0.116	N	0.45	SignalP-noTM
NechaP56804	0.162	25	0.139	25	0.174	2	0.123	0.131	N	0.45	SignalP-noTM
NechaP56796	0.11	60	0.108	25	0.119	9	0.109	0.109	N	0.45	SignalP-noTM
NechaP11453	0.146	21	0.128	42	0.279	36	0.136	0.132	N	0.45	SignalP-noTM
NechaP89548	0.111	38	0.11	38	0.118	32	0.103	0.106	N	0.45	SignalP-noTM
NechaP89549	0.108	62	0.131	13	0.184	1	0.152	0.142	N	0.45	SignalP-noTM
NechaP89550	0.161	19	0.143	19	0.193	18	0.126	0.134	N	0.45	SignalP-noTM
NechaP89551	0.12	35	0.138	35	0.221	30	0.153	0.144	N	0.5	SignalP-TM
NechaP19974	0.216	48	0.152	48	0.161	47	0.098	0.123	N	0.45	SignalP-noTM
NechaP89546	0.111	21	0.104	21	0.118	8	0.097	0.1	N	0.45	SignalP-noTM
NechaP98486	0.128	50	0.118	68	0.162	66	0.085	0.105	N	0.5	SignalP-TM
NechaP89545	0.589	20	0.735	20	0.963	12	0.916	0.833	Y	0.45	SignalP-noTM
NechaP89542	0.122	18	0.109	25	0.121	17	0.098	0.103	N	0.45	SignalP-noTM
NechaP89543	0.124	56	0.115	56	0.151	50	0.098	0.106	N	0.45	SignalP-noTM
NechaP89544	0.217	24	0.237	24	0.366	21	0.262	0.25	N	0.45	SignalP-noTM
NechaP89538	0.109	32	0.105	69	0.108	63	0.098	0.101	N	0.45	SignalP-noTM
NechaP89539	0.11	33	0.107	51	0.131	32	0.099	0.103	N	0.45	SignalP-noTM
NechaP56771	0.107	27	0.104	29	0.121	13	0.099	0.101	N	0.45	SignalP-noTM
NechaP56770	0.117	22	0.114	39	0.146	30	0.111	0.112	N	0.45	SignalP-noTM
NechaP89541	0.123	16	0.108	25	0.13	15	0.096	0.103	N	0.5	SignalP-TM
NechaP89537	0.117	20	0.111	20	0.127	1	0.102	0.106	N	0.45	SignalP-noTM
NechaP56763	0.117	17	0.117	17	0.145	3	0.115	0.116	N	0.45	SignalP-noTM
NechaP73318	0.113	49	0.106	64	0.116	55	0.099	0.102	N	0.45	SignalP-noTM
NechaP89534	0.192	23	0.175	23	0.312	3	0.189	0.181	N	0.5	SignalP-TM
NechaP89533	0.111	53	0.108	53	0.12	5	0.1	0.104	N	0.45	SignalP-noTM
NechaP98482	0.113	59	0.114	12	0.194	2	0.13	0.123	N	0.45	SignalP-noTM
NechaP89528	0.119	56	0.113	11	0.126	7	0.112	0.112	N	0.45	SignalP-noTM
NechaP89529	0.133	44	0.113	44	0.118	43	0.098	0.105	N	0.45	SignalP-noTM
NechaP56747	0.115	14	0.136	14	0.172	1	0.154	0.145	N	0.45	SignalP-noTM
NechaP89527	0.702	20	0.649	20	0.68	19	0.597	0.621	Y	0.45	SignalP-noTM
NechaP56739	0.525	28	0.582	28	0.867	1	0.666	0.627	Y	0.45	SignalP-noTM
NechaP89525	0.618	17	0.74	17	0.916	12	0.886	0.798	Y	0.5	SignalP-TM
NechaP19581	0.115	16	0.108	16	0.12	15	0.1	0.104	N	0.45	SignalP-noTM
NechaP56740	0.117	63	0.109	63	0.12	1	0.099	0.104	N	0.45	SignalP-noTM
NechaP123060	0.857	19	0.898	19	0.969	11	0.937	0.919	Y	0.45	SignalP-noTM
NechaP89520	0.124	46	0.122	21	0.164	9	0.126	0.124	N	0.45	SignalP-noTM
NechaP56730	0.108	48	0.123	11	0.198	2	0.137	0.131	N	0.45	SignalP-noTM
NechaP89522	0.133	50	0.146	44	0.247	12	0.144	0.145	N	0.5	SignalP-TM
NechaP9946	0.217	25	0.145	25	0.131	24	0.098	0.119	N	0.45	SignalP-noTM
NechaP56726	0.575	25	0.711	25	0.93	16	0.872	0.798	Y	0.45	SignalP-noTM
NechaP56718	0.122	24	0.144	12	0.251	1	0.167	0.157	N	0.45	SignalP-noTM
NechaP89517	0.125	36	0.111	13	0.137	6	0.115	0.113	N	0.45	SignalP-noTM
NechaP73313	0.122	60	0.112	60	0.145	4	0.105	0.108	N	0.45	SignalP-noTM
NechaP56714	0.111	69	0.107	49	0.12	22	0.104	0.105	N	0.45	SignalP-noTM
NechaP56711	0.122	9	0.126	12	0.185	2	0.117	0.121	N	0.45	SignalP-noTM
NechaP89515	0.114	40	0.129	12	0.191	1	0.131	0.13	N	0.45	SignalP-noTM
NechaP89510	0.153	50	0.125	50	0.155	1	0.102	0.112	N	0.45	SignalP-noTM
NechaP89511	0.22	35	0.211	35	0.533	6	0.235	0.224	N	0.45	SignalP-noTM
NechaP89512	0.153	32	0.19	32	0.302	31	0.197	0.192	N	0.5	SignalP-TM
NechaP56709	0.113	17	0.112	17	0.122	1	0.106	0.109	N	0.45	SignalP-noTM
NechaP89508	0.112	32	0.107	13	0.158	5	0.116	0.112	N	0.45	SignalP-noTM
NechaP56710	0.129	34	0.112	34	0.114	4	0.097	0.104	N	0.45	SignalP-noTM
NechaP56701	0.287	36	0.23	36	0.467	35	0.13	0.19	N	0.5	SignalP-TM
NechaP89503	0.108	44	0.107	14	0.115	4	0.107	0.107	N	0.45	SignalP-noTM
NechaP4538	0.11	11	0.118	11	0.184	4	0.124	0.121	N	0.45	SignalP-noTM
NechaP56707	0.294	26	0.207	26	0.338	25	0.149	0.176	N	0.45	SignalP-noTM
NechaP56698	0.116	30	0.107	65	0.12	1	0.097	0.101	N	0.45	SignalP-noTM
NechaP89499	0.128	30	0.112	51	0.126	45	0.1	0.105	N	0.45	SignalP-noTM
NechaP89500	0.168	21	0.213	11	0.651	2	0.4	0.288	N	0.5	SignalP-TM
NechaP56692	0.112	32	0.11	32	0.143	12	0.105	0.107	N	0.45	SignalP-noTM
NechaP56685	0.118	68	0.129	68	0.182	65	0.111	0.122	N	0.5	SignalP-TM
NechaP98469	0.138	33	0.13	21	0.2	38	0.125	0.128	N	0.45	SignalP-noTM
NechaP106625	0.132	45	0.125	45	0.164	36	0.114	0.119	N	0.45	SignalP-noTM
NechaP89495	0.749	21	0.833	21	0.97	15	0.929	0.885	Y	0.45	SignalP-noTM
NechaP65025	0.136	36	0.166	36	0.312	20	0.208	0.183	N	0.5	SignalP-TM
NechaP102316	0.109	62	0.107	62	0.122	50	0.098	0.103	N	0.45	SignalP-noTM
NechaP98465	0.11	40	0.11	40	0.126	27	0.106	0.108	N	0.45	SignalP-noTM
NechaP98466	0.132	24	0.22	19	0.454	3	0.386	0.287	N	0.5	SignalP-TM
NechaP56680	0.107	22	0.12	12	0.156	13	0.138	0.13	N	0.45	SignalP-noTM
NechaP56667	0.111	26	0.131	11	0.192	1	0.146	0.139	N	0.45	SignalP-noTM
NechaP56668	0.115	45	0.116	34	0.207	12	0.12	0.118	N	0.45	SignalP-noTM
NechaP89486	0.13	18	0.136	18	0.163	12	0.137	0.137	N	0.45	SignalP-noTM
NechaP89487	0.692	19	0.747	19	0.892	2	0.788	0.769	Y	0.45	SignalP-noTM
NechaP56660	0.476	22	0.387	22	0.449	2	0.308	0.344	N	0.45	SignalP-noTM
NechaP56664	0.124	19	0.119	19	0.187	50	0.11	0.114	N	0.45	SignalP-noTM
NechaP98463	0.109	65	0.107	65	0.115	48	0.098	0.102	N	0.45	SignalP-noTM
NechaP89483	0.233	22	0.214	22	0.562	19	0.198	0.205	N	0.45	SignalP-noTM
NechaP89476	0.147	25	0.122	25	0.151	50	0.103	0.112	N	0.45	SignalP-noTM
NechaP98461	0.115	31	0.112	31	0.168	9	0.112	0.112	N	0.45	SignalP-noTM
NechaP9125	0.116	26	0.115	58	0.174	46	0.108	0.111	N	0.45	SignalP-noTM
NechaP89479	0.115	28	0.107	12	0.125	27	0.101	0.104	N	0.45	SignalP-noTM
NechaP56650	0.108	69	0.102	69	0.101	1	0.094	0.098	N	0.45	SignalP-noTM
NechaP56645	0.118	20	0.124	11	0.17	2	0.137	0.131	N	0.45	SignalP-noTM
NechaP89474	0.112	55	0.126	12	0.186	1	0.116	0.12	N	0.45	SignalP-noTM
NechaP56640	0.465	18	0.646	18	0.957	7	0.884	0.775	Y	0.45	SignalP-noTM
NechaP89470	0.421	31	0.542	31	0.886	12	0.725	0.641	Y	0.45	SignalP-noTM
NechaP89471	0.111	62	0.112	54	0.125	35	0.107	0.109	N	0.45	SignalP-noTM
NechaP89472	0.107	25	0.109	11	0.12	1	0.107	0.108	N	0.45	SignalP-noTM
NechaP89473	0.13	19	0.12	19	0.146	12	0.112	0.115	N	0.45	SignalP-noTM
NechaP56638	0.122	21	0.113	21	0.143	47	0.103	0.108	N	0.45	SignalP-noTM
NechaP89467	0.112	36	0.109	20	0.142	52	0.107	0.108	N	0.5	SignalP-TM
NechaP89468	0.131	13	0.236	13	0.523	1	0.347	0.296	N	0.45	SignalP-noTM
NechaP73308	0.109	14	0.11	57	0.149	53	0.1	0.106	N	0.5	SignalP-TM
NechaP89465	0.144	21	0.121	21	0.13	11	0.103	0.111	N	0.45	SignalP-noTM
NechaP98456	0.161	58	0.143	58	0.207	50	0.123	0.132	N	0.45	SignalP-noTM
NechaP56630	0.275	19	0.235	19	0.271	10	0.196	0.22	N	0.5	SignalP-TM
NechaP89464	0.145	28	0.125	28	0.116	27	0.104	0.114	N	0.45	SignalP-noTM
NechaP89462	0.107	50	0.116	62	0.193	57	0.103	0.111	N	0.5	SignalP-TM
NechaP89463	0.108	65	0.108	11	0.122	1	0.106	0.107	N	0.45	SignalP-noTM
NechaP56620	0.829	19	0.883	19	0.968	15	0.943	0.915	Y	0.45	SignalP-noTM
NechaP56618	0.153	25	0.344	20	0.93	14	0.831	0.607	Y	0.45	SignalP-noTM
NechaP89460	0.107	65	0.103	45	0.113	3	0.1	0.102	N	0.45	SignalP-noTM
NechaP56621	0.134	43	0.142	25	0.233	7	0.169	0.157	N	0.45	SignalP-noTM
NechaP56607	0.28	30	0.199	12	0.529	1	0.33	0.251	N	0.5	SignalP-TM
NechaP89453	0.138	59	0.112	11	0.16	1	0.11	0.111	N	0.5	SignalP-TM
NechaP56600	0.126	29	0.18	15	0.352	6	0.265	0.226	N	0.45	SignalP-noTM
NechaP98450	0.216	20	0.324	20	0.693	19	0.467	0.401	N	0.45	SignalP-noTM
NechaP89456	0.123	22	0.109	22	0.115	27	0.097	0.103	N	0.45	SignalP-noTM
NechaP56594	0.12	35	0.132	35	0.184	30	0.139	0.135	N	0.5	SignalP-TM
NechaP102313	0.161	19	0.143	19	0.193	18	0.126	0.134	N	0.45	SignalP-noTM
NechaP89452	0.136	17	0.173	17	0.434	14	0.227	0.202	N	0.45	SignalP-noTM
NechaP89447	0.114	58	0.108	37	0.125	48	0.102	0.105	N	0.45	SignalP-noTM
NechaP89448	0.115	27	0.109	27	0.118	25	0.103	0.106	N	0.45	SignalP-noTM
NechaP56589	0.129	18	0.117	18	0.126	6	0.108	0.112	N	0.45	SignalP-noTM
NechaP89442	0.107	47	0.105	47	0.117	64	0.098	0.101	N	0.45	SignalP-noTM
NechaP89443	0.126	22	0.136	55	0.25	50	0.139	0.138	N	0.45	SignalP-noTM
NechaP89445	0.113	35	0.107	35	0.118	44	0.1	0.103	N	0.45	SignalP-noTM
NechaP89446	0.108	51	0.106	38	0.138	30	0.1	0.102	N	0.45	SignalP-noTM
NechaP98443	0.177	37	0.146	37	0.263	9	0.135	0.14	N	0.45	SignalP-noTM
NechaP56579	0.107	47	0.125	47	0.196	39	0.126	0.125	N	0.5	SignalP-TM
NechaP98445	0.108	22	0.124	11	0.198	2	0.143	0.134	N	0.45	SignalP-noTM
NechaP56578	0.113	17	0.107	59	0.115	16	0.101	0.104	N	0.45	SignalP-noTM
NechaP89440	0.139	20	0.184	20	0.31	15	0.234	0.211	N	0.45	SignalP-noTM
NechaP98447	0.11	16	0.108	43	0.137	32	0.099	0.103	N	0.45	SignalP-noTM
NechaP19921	0.275	28	0.223	28	0.582	2	0.224	0.224	N	0.45	SignalP-noTM
NechaP89432	0.193	17	0.148	17	0.129	16	0.11	0.128	N	0.45	SignalP-noTM
NechaP89433	0.109	50	0.112	12	0.137	2	0.115	0.114	N	0.45	SignalP-noTM
NechaP89434	0.136	54	0.149	39	0.39	37	0.168	0.159	N	0.45	SignalP-noTM
NechaP89435	0.158	17	0.251	17	0.572	3	0.362	0.311	N	0.45	SignalP-noTM
NechaP56571	0.109	27	0.104	39	0.116	21	0.096	0.1	N	0.45	SignalP-noTM
NechaP89430	0.11	67	0.107	41	0.113	26	0.101	0.103	N	0.45	SignalP-noTM
NechaP56568	0.109	36	0.108	17	0.131	4	0.106	0.107	N	0.45	SignalP-noTM
NechaP89424	0.251	25	0.158	25	0.122	44	0.1	0.127	N	0.45	SignalP-noTM
NechaP12611	0.108	60	0.105	37	0.111	26	0.098	0.101	N	0.45	SignalP-noTM
NechaP89426	0.131	24	0.219	24	0.569	3	0.368	0.299	N	0.45	SignalP-noTM
NechaP56558	0.114	28	0.156	28	0.309	8	0.207	0.184	N	0.45	SignalP-noTM
NechaP89428	0.129	68	0.112	68	0.109	51	0.097	0.104	N	0.45	SignalP-noTM
NechaP56564	0.107	69	0.106	15	0.138	11	0.11	0.108	N	0.45	SignalP-noTM
NechaP89423	0.111	51	0.109	12	0.123	1	0.096	0.102	N	0.45	SignalP-noTM
NechaP89420	0.165	52	0.165	18	0.321	17	0.225	0.197	N	0.45	SignalP-noTM
NechaP56552	0.12	22	0.103	49	0.137	1	0.07	0.09	N	0.5	SignalP-TM
NechaP89421	0.118	50	0.111	50	0.14	59	0.099	0.106	N	0.5	SignalP-TM
NechaP56548	0.146	38	0.117	38	0.133	32	0.097	0.109	N	0.5	SignalP-TM
NechaP89418	0.109	57	0.107	57	0.116	44	0.1	0.103	N	0.45	SignalP-noTM
NechaP89419	0.111	53	0.108	53	0.12	5	0.1	0.104	N	0.45	SignalP-noTM
NechaP89412	0.111	61	0.107	61	0.125	5	0.102	0.104	N	0.45	SignalP-noTM
NechaP102310	0.188	58	0.238	58	0.597	40	0.315	0.279	N	0.45	SignalP-noTM
NechaP16010	0.138	23	0.152	23	0.247	10	0.168	0.161	N	0.45	SignalP-noTM
NechaP56547	0.111	31	0.124	12	0.205	4	0.151	0.139	N	0.45	SignalP-noTM
NechaP89415	0.13	70	0.114	70	0.142	13	0.102	0.108	N	0.45	SignalP-noTM
NechaP89407	0.111	22	0.117	13	0.149	7	0.123	0.12	N	0.45	SignalP-noTM
NechaP89408	0.109	34	0.123	12	0.159	1	0.135	0.13	N	0.45	SignalP-noTM
NechaP89409	0.108	27	0.11	14	0.131	8	0.109	0.11	N	0.45	SignalP-noTM
NechaP89410	0.22	42	0.177	18	0.513	11	0.263	0.211	N	0.5	SignalP-TM
NechaP89411	0.111	38	0.11	69	0.132	55	0.104	0.107	N	0.45	SignalP-noTM
NechaP56544	0.113	19	0.103	19	0.106	28	0.092	0.097	N	0.45	SignalP-noTM
NechaP89402	0.145	20	0.156	35	0.336	34	0.161	0.159	N	0.45	SignalP-noTM
NechaP18445	0.142	37	0.129	37	0.167	7	0.123	0.126	N	0.45	SignalP-noTM
NechaP89404	0.175	23	0.214	23	0.321	19	0.239	0.224	N	0.5	SignalP-TM
NechaP89405	0.131	33	0.112	33	0.124	50	0.098	0.104	N	0.45	SignalP-noTM
NechaP98437	0.131	30	0.112	30	0.119	1	0.099	0.105	N	0.45	SignalP-noTM
NechaP89400	0.112	17	0.111	17	0.126	16	0.105	0.108	N	0.45	SignalP-noTM
NechaP89401	0.121	25	0.116	14	0.18	5	0.122	0.119	N	0.45	SignalP-noTM
NechaP89397	0.111	24	0.105	40	0.115	28	0.097	0.101	N	0.45	SignalP-noTM
NechaP56536	0.138	32	0.133	32	0.193	12	0.133	0.133	N	0.45	SignalP-noTM
NechaP89399	0.108	69	0.118	11	0.14	1	0.119	0.119	N	0.45	SignalP-noTM
NechaP89391	0.125	22	0.112	22	0.131	1	0.099	0.105	N	0.45	SignalP-noTM
NechaP56534	0.109	50	0.106	19	0.115	3	0.104	0.105	N	0.45	SignalP-noTM
NechaP105769	0.364	16	0.566	16	0.934	2	0.864	0.727	Y	0.45	SignalP-noTM
NechaP89394	0.109	57	0.111	12	0.14	2	0.109	0.11	N	0.45	SignalP-noTM
NechaP89395	0.11	39	0.111	39	0.132	33	0.106	0.108	N	0.45	SignalP-noTM
NechaP73300	0.122	17	0.117	17	0.137	12	0.115	0.116	N	0.45	SignalP-noTM
NechaP89390	0.11	65	0.107	11	0.126	27	0.103	0.105	N	0.45	SignalP-noTM
NechaP89383	0.195	30	0.232	30	0.391	15	0.279	0.251	N	0.5	SignalP-TM
NechaP102921	0.113	31	0.103	31	0.107	41	0.094	0.098	N	0.45	SignalP-noTM
NechaP105766	0.115	27	0.114	17	0.133	4	0.109	0.111	N	0.45	SignalP-noTM
NechaP89386	0.118	56	0.109	56	0.127	6	0.102	0.105	N	0.45	SignalP-noTM
NechaP89387	0.265	23	0.201	23	0.189	1	0.152	0.174	N	0.45	SignalP-noTM
NechaP89388	0.167	17	0.131	17	0.126	14	0.105	0.117	N	0.45	SignalP-noTM
NechaP73296	0.11	34	0.126	13	0.206	3	0.149	0.139	N	0.45	SignalP-noTM
NechaP105768	0.132	63	0.117	63	0.152	5	0.113	0.115	N	0.45	SignalP-noTM
NechaP56510	0.116	32	0.134	11	0.257	30	0.14	0.137	N	0.45	SignalP-noTM
NechaP102300	0.111	26	0.114	26	0.14	22	0.116	0.115	N	0.45	SignalP-noTM
NechaP105764	0.118	70	0.131	16	0.172	1	0.14	0.136	N	0.45	SignalP-noTM
NechaP102302	0.268	18	0.468	18	0.885	14	0.815	0.655	Y	0.45	SignalP-noTM
NechaP15792	0.169	21	0.18	21	0.268	17	0.19	0.185	N	0.45	SignalP-noTM
NechaP98426	0.186	29	0.15	29	0.215	1	0.126	0.137	N	0.45	SignalP-noTM
NechaP56504	0.26	28	0.239	28	0.486	1	0.249	0.243	N	0.5	SignalP-TM
NechaP56509	0.46	31	0.232	31	0.207	13	0.135	0.193	N	0.5	SignalP-TM
NechaP105765	0.321	18	0.283	18	0.404	15	0.221	0.249	N	0.45	SignalP-noTM
NechaP89364	0.151	31	0.178	11	0.421	1	0.19	0.185	N	0.45	SignalP-noTM
NechaP89365	0.11	34	0.11	36	0.125	25	0.104	0.107	N	0.45	SignalP-noTM
NechaP89366	0.149	22	0.163	22	0.262	1	0.174	0.169	N	0.45	SignalP-noTM
NechaP102299	0.11	45	0.112	19	0.158	10	0.118	0.115	N	0.45	SignalP-noTM
NechaP56499	0.15	23	0.122	23	0.112	55	0.099	0.11	N	0.45	SignalP-noTM
NechaP89369	0.136	57	0.119	57	0.119	36	0.099	0.108	N	0.45	SignalP-noTM
NechaP19590	0.123	24	0.126	40	0.17	37	0.114	0.121	N	0.5	SignalP-TM
NechaP56498	0.119	17	0.107	45	0.111	4	0.098	0.102	N	0.45	SignalP-noTM
NechaP89372	0.121	21	0.128	21	0.257	15	0.136	0.132	N	0.45	SignalP-noTM
NechaP106616	0.674	19	0.779	19	0.93	8	0.894	0.841	Y	0.45	SignalP-noTM
NechaP106617	0.86	19	0.834	19	0.861	15	0.818	0.826	Y	0.45	SignalP-noTM
NechaP89348	0.153	57	0.12	57	0.116	20	0.097	0.108	N	0.45	SignalP-noTM
NechaP56471	0.142	19	0.114	19	0.16	50	0.092	0.102	N	0.45	SignalP-noTM
NechaP56483	0.12	35	0.126	25	0.187	4	0.138	0.132	N	0.45	SignalP-noTM
NechaP89351	0.109	46	0.115	13	0.154	2	0.117	0.116	N	0.45	SignalP-noTM
NechaP98418	0.125	30	0.112	30	0.125	28	0.101	0.106	N	0.45	SignalP-noTM
NechaP98419	0.13	35	0.111	35	0.11	57	0.097	0.103	N	0.45	SignalP-noTM
NechaP89354	0.163	30	0.206	11	0.632	3	0.388	0.279	N	0.5	SignalP-TM
NechaP98420	0.11	40	0.113	13	0.155	7	0.13	0.122	N	0.45	SignalP-noTM
NechaP89356	0.163	21	0.149	21	0.209	5	0.136	0.142	N	0.45	SignalP-noTM
NechaP89357	0.115	28	0.111	28	0.122	56	0.105	0.108	N	0.45	SignalP-noTM
NechaP56474	0.127	31	0.111	31	0.124	1	0.101	0.106	N	0.45	SignalP-noTM
NechaP56470	0.161	17	0.224	17	0.447	16	0.285	0.257	N	0.45	SignalP-noTM
NechaP98423	0.241	26	0.248	26	0.365	20	0.238	0.244	N	0.5	SignalP-TM
NechaP89344	0.111	60	0.121	11	0.169	2	0.116	0.119	N	0.45	SignalP-noTM
NechaP89345	0.131	28	0.139	12	0.212	1	0.148	0.144	N	0.45	SignalP-noTM
NechaP64999	0.122	41	0.113	41	0.135	24	0.104	0.108	N	0.45	SignalP-noTM
NechaP89347	0.155	60	0.124	60	0.191	2	0.108	0.115	N	0.45	SignalP-noTM
NechaP64996	0.122	18	0.111	18	0.152	46	0.101	0.105	N	0.45	SignalP-noTM
NechaP89343	0.11	37	0.114	12	0.144	1	0.104	0.109	N	0.45	SignalP-noTM
NechaP19975	0.161	19	0.126	19	0.12	13	0.099	0.112	N	0.45	SignalP-noTM
NechaP73279	0.11	41	0.105	41	0.113	2	0.096	0.1	N	0.45	SignalP-noTM
NechaP56444	0.119	58	0.135	11	0.188	2	0.166	0.152	N	0.45	SignalP-noTM
NechaP89337	0.111	65	0.107	11	0.121	25	0.103	0.105	N	0.45	SignalP-noTM
NechaP56446	0.109	43	0.103	65	0.109	20	0.094	0.098	N	0.45	SignalP-noTM
NechaP89339	0.117	18	0.176	11	0.328	1	0.262	0.223	N	0.45	SignalP-noTM
NechaP56442	0.169	25	0.262	17	0.606	9	0.448	0.363	N	0.45	SignalP-noTM
NechaP89328	0.185	26	0.161	20	0.219	1	0.14	0.15	N	0.45	SignalP-noTM
NechaP89329	0.124	28	0.116	11	0.15	1	0.114	0.115	N	0.45	SignalP-noTM
NechaP89330	0.216	47	0.16	47	0.215	1	0.136	0.147	N	0.45	SignalP-noTM
NechaP56431	0.123	18	0.113	18	0.147	5	0.107	0.11	N	0.45	SignalP-noTM
NechaP19475	0.112	16	0.131	11	0.188	1	0.138	0.135	N	0.45	SignalP-noTM
NechaP89333	0.108	51	0.106	38	0.138	30	0.1	0.102	N	0.45	SignalP-noTM
NechaP9815	0.11	29	0.101	60	0.109	8	0.093	0.097	N	0.45	SignalP-noTM
NechaP89335	0.111	56	0.111	56	0.121	43	0.101	0.105	N	0.45	SignalP-noTM
NechaP89327	0.147	24	0.134	44	0.274	43	0.111	0.121	N	0.45	SignalP-noTM
NechaP98409	0.86	21	0.867	21	0.96	12	0.87	0.868	Y	0.45	SignalP-noTM
NechaP73270	0.308	19	0.182	19	0.135	3	0.11	0.143	N	0.45	SignalP-noTM
NechaP89325	0.11	63	0.116	11	0.138	1	0.113	0.115	N	0.45	SignalP-noTM
NechaP17739	0.112	22	0.113	16	0.138	15	0.113	0.113	N	0.45	SignalP-noTM
NechaP89312	0.131	58	0.119	58	0.132	5	0.106	0.112	N	0.45	SignalP-noTM
NechaP56408	0.137	19	0.109	19	0.135	66	0.084	0.099	N	0.5	SignalP-TM
NechaP10996	0.111	54	0.107	37	0.119	22	0.102	0.104	N	0.45	SignalP-noTM
NechaP98403	0.123	25	0.169	11	0.323	2	0.256	0.216	N	0.45	SignalP-noTM
NechaP56406	0.141	33	0.146	18	0.214	14	0.164	0.153	N	0.5	SignalP-TM
NechaP98405	0.196	19	0.167	19	0.182	1	0.134	0.149	N	0.45	SignalP-noTM
NechaP15955	0.132	32	0.175	32	0.343	21	0.231	0.198	N	0.5	SignalP-TM
NechaP73269	0.111	30	0.122	11	0.206	6	0.159	0.142	N	0.45	SignalP-noTM
NechaP98408	0.121	49	0.112	49	0.137	45	0.107	0.109	N	0.45	SignalP-noTM
NechaP18163	0.111	32	0.129	12	0.203	1	0.128	0.128	N	0.45	SignalP-noTM
NechaP56385	0.124	61	0.14	22	0.245	17	0.166	0.15	N	0.5	SignalP-TM
NechaP14093	0.266	20	0.341	20	0.532	10	0.425	0.375	N	0.5	SignalP-TM
NechaP98391	0.147	53	0.132	53	0.15	50	0.109	0.12	N	0.45	SignalP-noTM
NechaP56371	0.16	25	0.145	25	0.172	9	0.132	0.138	N	0.45	SignalP-noTM
NechaP56373	0.129	23	0.122	23	0.166	1	0.116	0.119	N	0.45	SignalP-noTM
NechaP9911	0.134	17	0.141	17	0.201	7	0.147	0.144	N	0.45	SignalP-noTM
NechaP56363	0.298	23	0.31	23	0.578	2	0.322	0.316	N	0.45	SignalP-noTM
NechaP56381	0.153	43	0.14	20	0.304	3	0.166	0.154	N	0.45	SignalP-noTM
NechaP56358	0.124	65	0.118	14	0.173	5	0.144	0.132	N	0.45	SignalP-noTM
NechaP89306	0.115	35	0.106	35	0.12	7	0.1	0.103	N	0.45	SignalP-noTM
NechaP89307	0.115	25	0.154	11	0.282	2	0.168	0.162	N	0.45	SignalP-noTM
NechaP56368	0.135	29	0.152	29	0.274	12	0.174	0.164	N	0.45	SignalP-noTM
NechaP56375	0.143	24	0.167	24	0.355	15	0.2	0.185	N	0.45	SignalP-noTM
NechaP18057	0.121	20	0.113	20	0.128	32	0.102	0.107	N	0.45	SignalP-noTM
NechaP73264	0.115	34	0.122	34	0.199	31	0.13	0.126	N	0.45	SignalP-noTM
NechaP19117	0.211	21	0.314	21	0.817	1	0.434	0.379	N	0.45	SignalP-noTM
NechaP98389	0.133	38	0.129	18	0.199	10	0.152	0.138	N	0.5	SignalP-TM
NechaP19942	0.116	25	0.113	11	0.138	2	0.115	0.114	N	0.45	SignalP-noTM
NechaP89295	0.112	49	0.112	49	0.119	42	0.101	0.106	N	0.45	SignalP-noTM
NechaP56352	0.115	24	0.111	70	0.186	67	0.103	0.108	N	0.5	SignalP-TM
NechaP56350	0.116	19	0.13	19	0.215	35	0.146	0.139	N	0.45	SignalP-noTM
NechaP89298	0.13	21	0.116	21	0.12	10	0.104	0.109	N	0.45	SignalP-noTM
NechaP9993	0.186	24	0.268	24	0.639	4	0.384	0.331	N	0.45	SignalP-noTM
NechaP89288	0.118	45	0.116	11	0.151	1	0.105	0.11	N	0.45	SignalP-noTM
NechaP89282	0.129	54	0.129	54	0.202	41	0.118	0.123	N	0.45	SignalP-noTM
NechaP56323	0.109	64	0.103	33	0.111	20	0.098	0.101	N	0.45	SignalP-noTM
NechaP56330	0.15	52	0.136	24	0.201	7	0.153	0.145	N	0.45	SignalP-noTM
NechaP89285	0.154	47	0.121	47	0.122	1	0.101	0.11	N	0.45	SignalP-noTM
NechaP89286	0.117	26	0.109	52	0.139	32	0.102	0.105	N	0.45	SignalP-noTM
NechaP89277	0.112	58	0.118	58	0.161	51	0.105	0.111	N	0.45	SignalP-noTM
NechaP18712	0.112	28	0.111	11	0.163	23	0.108	0.11	N	0.45	SignalP-noTM
NechaP56319	0.109	44	0.104	57	0.118	51	0.093	0.098	N	0.45	SignalP-noTM
NechaP56321	0.197	38	0.182	38	0.219	43	0.137	0.164	N	0.5	SignalP-TM
NechaP89280	0.116	19	0.111	12	0.129	1	0.104	0.108	N	0.45	SignalP-noTM
NechaP56320	0.142	31	0.203	18	0.555	11	0.361	0.266	N	0.5	SignalP-TM
NechaP56317	0.239	20	0.316	20	0.553	2	0.408	0.366	N	0.45	SignalP-noTM
NechaP89276	0.109	59	0.106	59	0.119	45	0.096	0.101	N	0.45	SignalP-noTM
NechaP89261	0.116	38	0.115	27	0.166	12	0.121	0.118	N	0.45	SignalP-noTM
NechaP56307	0.11	58	0.111	11	0.136	7	0.115	0.114	N	0.45	SignalP-noTM
NechaP56314	0.129	34	0.115	12	0.145	9	0.116	0.115	N	0.45	SignalP-noTM
NechaP56302	0.115	27	0.111	11	0.151	4	0.116	0.114	N	0.45	SignalP-noTM
NechaP89264	0.116	20	0.118	20	0.157	19	0.12	0.119	N	0.45	SignalP-noTM
NechaP56284	0.208	24	0.209	24	0.276	6	0.217	0.212	N	0.5	SignalP-TM
NechaP56283	0.208	19	0.146	52	0.239	42	0.138	0.143	N	0.5	SignalP-TM
NechaP56308	0.108	64	0.117	12	0.149	1	0.106	0.111	N	0.45	SignalP-noTM
NechaP89268	0.118	28	0.142	11	0.223	1	0.148	0.145	N	0.45	SignalP-noTM
NechaP89269	0.224	17	0.176	17	0.25	16	0.138	0.161	N	0.5	SignalP-TM
NechaP56310	0.153	26	0.126	11	0.235	1	0.123	0.125	N	0.5	SignalP-TM
NechaP89271	0.131	33	0.118	11	0.15	12	0.123	0.121	N	0.45	SignalP-noTM
NechaP89272	0.556	17	0.661	17	0.859	15	0.778	0.724	Y	0.45	SignalP-noTM
NechaP89273	0.116	21	0.126	21	0.178	19	0.134	0.13	N	0.45	SignalP-noTM
NechaP56315	0.122	17	0.117	17	0.142	21	0.109	0.113	N	0.45	SignalP-noTM
NechaP18304	0.113	29	0.12	11	0.171	1	0.104	0.111	N	0.45	SignalP-noTM
NechaP56288	0.111	22	0.108	49	0.142	35	0.082	0.098	N	0.5	SignalP-TM
NechaP89252	0.124	56	0.115	56	0.151	50	0.097	0.105	N	0.45	SignalP-noTM
NechaP89254	0.106	47	0.125	54	0.198	46	0.113	0.12	N	0.5	SignalP-TM
NechaP56269	0.112	38	0.107	14	0.122	8	0.108	0.108	N	0.45	SignalP-noTM
NechaP14897	0.107	25	0.119	34	0.222	22	0.114	0.117	N	0.5	SignalP-TM
NechaP56268	0.135	58	0.106	69	0.132	67	0.092	0.101	N	0.5	SignalP-TM
NechaP15869	0.272	31	0.192	31	0.238	25	0.135	0.161	N	0.45	SignalP-noTM
NechaP98377	0.133	26	0.116	26	0.152	24	0.102	0.109	N	0.45	SignalP-noTM
NechaP98378	0.136	34	0.128	34	0.166	32	0.106	0.119	N	0.5	SignalP-TM
NechaP56277	0.118	29	0.119	29	0.147	7	0.122	0.121	N	0.45	SignalP-noTM
NechaP56263	0.108	63	0.107	41	0.122	23	0.104	0.105	N	0.45	SignalP-noTM
NechaP56259	0.133	20	0.162	20	0.254	5	0.192	0.178	N	0.45	SignalP-noTM
NechaP56258	0.118	21	0.115	21	0.13	1	0.11	0.112	N	0.45	SignalP-noTM
NechaP89251	0.111	46	0.108	49	0.126	13	0.104	0.106	N	0.45	SignalP-noTM
NechaP4204	0.542	25	0.34	25	0.33	4	0.232	0.297	N	0.5	SignalP-TM
NechaP98371	0.113	31	0.104	31	0.123	14	0.098	0.101	N	0.45	SignalP-noTM
NechaP56257	0.111	62	0.108	62	0.128	2	0.097	0.102	N	0.45	SignalP-noTM
NechaP56248	0.419	21	0.585	21	0.885	11	0.811	0.707	Y	0.45	SignalP-noTM
NechaP89247	0.155	48	0.128	48	0.123	41	0.106	0.116	N	0.45	SignalP-noTM
NechaP56255	0.112	23	0.173	11	0.411	3	0.245	0.202	N	0.5	SignalP-TM
NechaP56243	0.198	18	0.373	18	0.797	3	0.716	0.51	Y	0.5	SignalP-TM
NechaP56237	0.111	70	0.111	35	0.143	18	0.11	0.11	N	0.45	SignalP-noTM
NechaP89231	0.368	24	0.21	24	0.152	10	0.12	0.161	N	0.45	SignalP-noTM
NechaP89232	0.117	17	0.103	17	0.111	50	0.092	0.097	N	0.45	SignalP-noTM
NechaP56227	0.113	30	0.121	22	0.202	13	0.132	0.127	N	0.45	SignalP-noTM
NechaP56228	0.184	46	0.151	46	0.221	45	0.111	0.129	N	0.45	SignalP-noTM
NechaP56229	0.58	21	0.72	21	0.943	15	0.895	0.815	Y	0.45	SignalP-noTM
NechaP98368	0.108	23	0.111	67	0.157	58	0.098	0.106	N	0.5	SignalP-TM
NechaP89238	0.173	38	0.135	38	0.143	8	0.109	0.121	N	0.45	SignalP-noTM
NechaP56225	0.105	3	0.09	11	0.091	19	0.077	0.085	N	0.5	SignalP-TM
NechaP56198	0.204	22	0.152	22	0.156	2	0.112	0.13	N	0.45	SignalP-noTM
NechaP89216	0.209	47	0.149	47	0.215	2	0.119	0.133	N	0.45	SignalP-noTM
NechaP56211	0.403	17	0.598	17	0.934	2	0.883	0.752	Y	0.45	SignalP-noTM
NechaP102290	0.382	18	0.541	18	0.84	8	0.76	0.659	Y	0.45	SignalP-noTM
NechaP56203	0.109	41	0.109	11	0.143	5	0.121	0.115	N	0.45	SignalP-noTM
NechaP89220	0.728	25	0.827	25	0.971	9	0.94	0.888	Y	0.45	SignalP-noTM
NechaP18435	0.122	48	0.116	15	0.145	10	0.12	0.118	N	0.45	SignalP-noTM
NechaP98359	0.701	22	0.787	22	0.947	4	0.884	0.84	Y	0.45	SignalP-noTM
NechaP89223	0.126	26	0.117	26	0.172	2	0.112	0.114	N	0.45	SignalP-noTM
NechaP56209	0.428	18	0.441	18	0.585	2	0.431	0.435	N	0.45	SignalP-noTM
NechaP89225	0.186	27	0.168	12	0.349	5	0.286	0.215	N	0.5	SignalP-TM
NechaP102292	0.112	22	0.13	11	0.2	1	0.151	0.138	N	0.5	SignalP-TM
NechaP98362	0.137	51	0.112	51	0.128	1	0.095	0.103	N	0.45	SignalP-noTM
NechaP89228	0.239	50	0.158	50	0.145	1	0.104	0.129	N	0.45	SignalP-noTM
NechaP56215	0.448	20	0.626	20	0.923	12	0.875	0.76	Y	0.45	SignalP-noTM
NechaP56206	0.316	16	0.473	16	0.78	11	0.717	0.605	Y	0.45	SignalP-noTM
NechaP56199	0.166	36	0.12	23	0.178	10	0.123	0.121	N	0.5	SignalP-TM
NechaP89206	0.109	25	0.102	36	0.107	22	0.094	0.098	N	0.45	SignalP-noTM
NechaP89207	0.115	27	0.108	27	0.131	26	0.102	0.104	N	0.45	SignalP-noTM
NechaP56194	0.207	22	0.182	22	0.261	1	0.156	0.168	N	0.45	SignalP-noTM
NechaP89209	0.129	41	0.113	41	0.128	9	0.104	0.109	N	0.45	SignalP-noTM
NechaP89210	0.109	25	0.107	37	0.126	24	0.104	0.106	N	0.45	SignalP-noTM
NechaP89211	0.152	34	0.119	34	0.114	41	0.094	0.105	N	0.45	SignalP-noTM
NechaP56190	0.112	70	0.109	11	0.136	2	0.107	0.108	N	0.45	SignalP-noTM
NechaP89213	0.114	46	0.103	70	0.111	67	0.097	0.1	N	0.45	SignalP-noTM
NechaP89214	0.114	23	0.11	23	0.114	10	0.106	0.108	N	0.45	SignalP-noTM
NechaP89201	0.138	37	0.117	37	0.131	5	0.102	0.109	N	0.45	SignalP-noTM
NechaP89203	0.119	18	0.188	11	0.437	2	0.296	0.247	N	0.45	SignalP-noTM
NechaP56187	0.122	18	0.214	12	0.581	1	0.312	0.267	N	0.45	SignalP-noTM
NechaP89204	0.171	20	0.159	20	0.216	1	0.137	0.147	N	0.45	SignalP-noTM
NechaP89205	0.109	34	0.109	11	0.13	6	0.115	0.112	N	0.45	SignalP-noTM
NechaP56178	0.115	16	0.142	43	0.227	38	0.163	0.151	N	0.5	SignalP-TM
NechaP56184	0.12	54	0.11	11	0.133	4	0.107	0.108	N	0.45	SignalP-noTM
NechaP89195	0.11	31	0.132	11	0.207	1	0.144	0.138	N	0.45	SignalP-noTM
NechaP56170	0.114	18	0.107	18	0.124	7	0.102	0.104	N	0.45	SignalP-noTM
NechaP56169	0.109	34	0.106	24	0.141	11	0.107	0.107	N	0.45	SignalP-noTM
NechaP89196	0.125	55	0.109	11	0.137	1	0.099	0.103	N	0.45	SignalP-noTM
NechaP89188	0.109	48	0.109	44	0.118	27	0.101	0.105	N	0.45	SignalP-noTM
NechaP89190	0.11	64	0.107	11	0.115	1	0.102	0.104	N	0.45	SignalP-noTM
NechaP89191	0.108	43	0.109	70	0.132	53	0.103	0.106	N	0.45	SignalP-noTM
NechaP56165	0.127	47	0.132	11	0.198	1	0.125	0.129	N	0.45	SignalP-noTM
NechaP89192	0.125	55	0.109	11	0.137	1	0.099	0.103	N	0.45	SignalP-noTM
NechaP56159	0.112	52	0.11	52	0.136	31	0.101	0.105	N	0.45	SignalP-noTM
NechaP56158	0.125	36	0.117	36	0.128	26	0.107	0.111	N	0.45	SignalP-noTM
NechaP89186	0.139	69	0.118	69	0.146	45	0.105	0.111	N	0.45	SignalP-noTM
NechaP89187	0.114	34	0.108	59	0.119	48	0.102	0.105	N	0.45	SignalP-noTM
NechaP56145	0.152	22	0.121	22	0.133	1	0.095	0.107	N	0.45	SignalP-noTM
NechaP64974	0.126	35	0.162	17	0.287	2	0.212	0.189	N	0.45	SignalP-noTM
NechaP89179	0.112	52	0.11	52	0.136	31	0.101	0.105	N	0.45	SignalP-noTM
NechaP56146	0.125	36	0.117	36	0.128	26	0.107	0.111	N	0.45	SignalP-noTM
NechaP56150	0.113	47	0.11	47	0.171	44	0.097	0.103	N	0.45	SignalP-noTM
NechaP89182	0.108	24	0.108	40	0.12	4	0.101	0.104	N	0.45	SignalP-noTM
NechaP102289	0.118	33	0.11	33	0.118	21	0.1	0.104	N	0.45	SignalP-noTM
NechaP56132	0.277	39	0.197	39	0.237	26	0.143	0.168	N	0.45	SignalP-noTM
NechaP56140	0.217	34	0.163	34	0.166	32	0.126	0.143	N	0.45	SignalP-noTM
NechaP102287	0.144	20	0.132	20	0.174	16	0.119	0.125	N	0.45	SignalP-noTM
NechaP89173	0.111	32	0.111	38	0.149	5	0.11	0.111	N	0.45	SignalP-noTM
NechaP17424	0.21	42	0.183	42	0.294	38	0.136	0.164	N	0.5	SignalP-TM
NechaP19696	0.28	29	0.401	29	0.823	16	0.615	0.517	Y	0.45	SignalP-noTM
NechaP89162	0.169	62	0.14	11	0.216	1	0.132	0.135	N	0.45	SignalP-noTM
NechaP89163	0.117	70	0.113	24	0.151	11	0.112	0.113	N	0.45	SignalP-noTM
NechaP89164	0.108	64	0.12	11	0.155	1	0.117	0.118	N	0.45	SignalP-noTM
NechaP56121	0.11	59	0.127	11	0.21	2	0.143	0.136	N	0.45	SignalP-noTM
NechaP98341	0.128	32	0.131	32	0.176	11	0.136	0.134	N	0.45	SignalP-noTM
NechaP56127	0.106	21	0.152	11	0.306	3	0.181	0.168	N	0.45	SignalP-noTM
NechaP56119	0.124	19	0.122	19	0.165	14	0.121	0.122	N	0.45	SignalP-noTM
NechaP56120	0.145	25	0.116	25	0.142	37	0.092	0.103	N	0.45	SignalP-noTM
NechaP98344	0.13	22	0.147	22	0.246	4	0.168	0.158	N	0.45	SignalP-noTM
NechaP18964	0.188	37	0.197	37	0.402	6	0.236	0.218	N	0.45	SignalP-noTM
NechaP56114	0.145	32	0.137	32	0.243	3	0.138	0.138	N	0.45	SignalP-noTM
NechaP19784	0.109	65	0.112	40	0.145	2	0.111	0.111	N	0.45	SignalP-noTM
NechaP89157	0.172	35	0.132	35	0.18	34	0.1	0.114	N	0.45	SignalP-noTM
NechaP89158	0.226	24	0.261	24	0.486	3	0.346	0.295	N	0.5	SignalP-TM
NechaP98338	0.123	61	0.143	61	0.245	58	0.116	0.132	N	0.5	SignalP-TM
NechaP98339	0.109	67	0.117	67	0.165	59	0.107	0.113	N	0.5	SignalP-TM
NechaP89161	0.108	22	0.118	11	0.21	5	0.14	0.13	N	0.45	SignalP-noTM
NechaP56078	0.751	22	0.782	22	0.88	10	0.814	0.799	Y	0.45	SignalP-noTM
NechaP56085	0.138	29	0.13	29	0.184	12	0.125	0.127	N	0.45	SignalP-noTM
NechaP89142	0.128	51	0.164	24	0.417	9	0.226	0.197	N	0.45	SignalP-noTM
NechaP56081	0.404	18	0.607	18	0.94	13	0.914	0.773	Y	0.45	SignalP-noTM
NechaP56071	0.144	45	0.117	45	0.13	43	0.097	0.106	N	0.45	SignalP-noTM
NechaP17307	0.118	21	0.123	21	0.148	12	0.126	0.125	N	0.45	SignalP-noTM
NechaP89146	0.189	22	0.153	22	0.156	18	0.123	0.137	N	0.45	SignalP-noTM
NechaP98332	0.109	62	0.112	11	0.145	1	0.098	0.105	N	0.45	SignalP-noTM
NechaP89148	0.167	18	0.208	18	0.327	3	0.246	0.228	N	0.45	SignalP-noTM
NechaP89149	0.128	18	0.118	18	0.13	2	0.111	0.114	N	0.45	SignalP-noTM
NechaP56106	0.111	68	0.107	12	0.127	10	0.109	0.108	N	0.45	SignalP-noTM
NechaP56097	0.161	43	0.117	23	0.198	42	0.118	0.117	N	0.5	SignalP-TM
NechaP56076	0.111	59	0.104	59	0.108	24	0.095	0.099	N	0.45	SignalP-noTM
NechaP89153	0.113	61	0.105	61	0.12	22	0.101	0.103	N	0.45	SignalP-noTM
NechaP56083	0.194	32	0.147	32	0.181	1	0.122	0.134	N	0.45	SignalP-noTM
NechaP56107	0.164	55	0.175	55	0.316	38	0.145	0.163	N	0.5	SignalP-TM
NechaP89123	0.16	45	0.164	45	0.27	43	0.158	0.161	N	0.45	SignalP-noTM
NechaP89124	0.38	19	0.566	19	0.909	4	0.841	0.715	Y	0.45	SignalP-noTM
NechaP18644	0.11	16	0.104	32	0.117	61	0.093	0.099	N	0.5	SignalP-TM
NechaP89126	0.111	31	0.107	69	0.117	11	0.102	0.104	N	0.45	SignalP-noTM
NechaP106608	0.107	28	0.11	15	0.142	4	0.12	0.115	N	0.45	SignalP-noTM
NechaP56065	0.111	48	0.112	55	0.168	47	0.106	0.109	N	0.45	SignalP-noTM
NechaP89129	0.155	39	0.128	39	0.126	37	0.106	0.116	N	0.45	SignalP-noTM
NechaP56041	0.12	66	0.104	66	0.141	63	0.089	0.098	N	0.5	SignalP-TM
NechaP56037	0.145	24	0.14	24	0.19	44	0.123	0.133	N	0.5	SignalP-TM
NechaP56035	0.26	21	0.202	21	0.207	4	0.153	0.176	N	0.45	SignalP-noTM
NechaP56055	0.142	48	0.114	48	0.168	12	0.093	0.106	N	0.5	SignalP-TM
NechaP106609	0.823	22	0.752	22	0.828	15	0.683	0.715	Y	0.45	SignalP-noTM
NechaP89135	0.671	18	0.777	18	0.937	1	0.891	0.838	Y	0.45	SignalP-noTM
NechaP89136	0.565	25	0.663	25	0.902	13	0.779	0.725	Y	0.45	SignalP-noTM
NechaP56051	0.116	20	0.112	20	0.126	21	0.108	0.11	N	0.45	SignalP-noTM
NechaP89138	0.108	64	0.138	52	0.299	46	0.122	0.131	N	0.5	SignalP-TM
NechaP56032	0.109	67	0.103	43	0.108	20	0.097	0.1	N	0.45	SignalP-noTM
NechaP89113	0.133	17	0.113	17	0.118	33	0.096	0.104	N	0.45	SignalP-noTM
NechaP89114	0.111	24	0.106	45	0.122	23	0.098	0.101	N	0.45	SignalP-noTM
NechaP89116	0.106	44	0.106	15	0.123	7	0.112	0.11	N	0.45	SignalP-noTM
NechaP89117	0.126	26	0.158	26	0.324	17	0.202	0.182	N	0.45	SignalP-noTM
NechaP89118	0.115	23	0.133	11	0.213	2	0.149	0.142	N	0.45	SignalP-noTM
NechaP56027	0.11	52	0.103	52	0.106	1	0.094	0.098	N	0.45	SignalP-noTM
NechaP89120	0.122	37	0.117	20	0.196	11	0.123	0.119	N	0.5	SignalP-TM
NechaP89121	0.109	43	0.139	11	0.22	1	0.133	0.136	N	0.45	SignalP-noTM
NechaP89122	0.11	35	0.106	70	0.114	22	0.098	0.102	N	0.45	SignalP-noTM
NechaP102284	0.11	46	0.114	15	0.136	2	0.115	0.115	N	0.45	SignalP-noTM
NechaP56014	0.278	27	0.181	11	0.403	3	0.299	0.228	N	0.5	SignalP-TM
NechaP105757	0.108	36	0.127	70	0.181	61	0.112	0.121	N	0.5	SignalP-TM
NechaP98311	0.23	37	0.163	37	0.142	31	0.115	0.137	N	0.45	SignalP-noTM
NechaP17059	0.116	31	0.123	11	0.167	2	0.133	0.128	N	0.45	SignalP-noTM
NechaP55991	0.53	23	0.687	23	0.956	14	0.892	0.798	Y	0.45	SignalP-noTM
NechaP89104	0.417	16	0.606	16	0.925	2	0.862	0.744	Y	0.45	SignalP-noTM
NechaP56005	0.111	46	0.11	11	0.153	12	0.105	0.107	N	0.45	SignalP-noTM
NechaP89106	0.128	40	0.112	40	0.118	12	0.099	0.105	N	0.45	SignalP-noTM
NechaP55997	0.121	17	0.12	17	0.143	1	0.109	0.114	N	0.45	SignalP-noTM
NechaP55992	0.138	34	0.123	34	0.186	33	0.107	0.114	N	0.45	SignalP-noTM
NechaP56002	0.406	21	0.271	21	0.289	3	0.175	0.219	N	0.45	SignalP-noTM
NechaP89110	0.111	49	0.108	43	0.117	26	0.107	0.108	N	0.45	SignalP-noTM
NechaP89111	0.622	22	0.652	22	0.781	2	0.679	0.667	Y	0.45	SignalP-noTM
NechaP55989	0.117	36	0.111	12	0.127	1	0.101	0.105	N	0.45	SignalP-noTM
NechaP55996	0.108	32	0.143	11	0.253	1	0.143	0.143	N	0.45	SignalP-noTM
NechaP89082	0.135	28	0.121	28	0.143	27	0.107	0.114	N	0.45	SignalP-noTM
NechaP55953	0.127	51	0.136	51	0.197	47	0.106	0.124	N	0.5	SignalP-TM
NechaP2320	0.115	13	0.121	13	0.14	2	0.116	0.118	N	0.45	SignalP-noTM
NechaP89085	0.113	25	0.107	25	0.122	2	0.102	0.105	N	0.45	SignalP-noTM
NechaP55961	0.134	28	0.17	12	0.393	2	0.227	0.2	N	0.45	SignalP-noTM
NechaP89087	0.108	42	0.112	42	0.125	36	0.101	0.108	N	0.5	SignalP-TM
NechaP89088	0.164	20	0.262	20	0.526	6	0.412	0.343	N	0.45	SignalP-noTM
NechaP15531	0.108	55	0.116	11	0.146	1	0.11	0.113	N	0.45	SignalP-noTM
NechaP55962	0.119	25	0.112	25	0.132	12	0.105	0.108	N	0.45	SignalP-noTM
NechaP89091	0.111	23	0.109	37	0.132	22	0.105	0.107	N	0.45	SignalP-noTM
NechaP55985	0.106	62	0.102	41	0.118	52	0.093	0.098	N	0.5	SignalP-TM
NechaP15651	0.108	28	0.104	41	0.118	55	0.098	0.101	N	0.45	SignalP-noTM
NechaP55959	0.126	33	0.125	13	0.15	1	0.13	0.128	N	0.45	SignalP-noTM
NechaP89094	0.11	40	0.108	24	0.139	39	0.107	0.108	N	0.45	SignalP-noTM
NechaP55976	0.109	55	0.108	50	0.131	33	0.103	0.106	N	0.45	SignalP-noTM
NechaP18397	0.112	32	0.107	12	0.121	2	0.107	0.107	N	0.45	SignalP-noTM
NechaP55960	0.326	20	0.55	20	0.97	12	0.934	0.758	Y	0.45	SignalP-noTM
NechaP89098	0.147	26	0.127	11	0.195	1	0.121	0.124	N	0.45	SignalP-noTM
NechaP98292	0.232	24	0.232	24	0.362	3	0.235	0.234	N	0.45	SignalP-noTM
NechaP55945	0.134	26	0.126	26	0.139	5	0.118	0.122	N	0.45	SignalP-noTM
NechaP64964	0.11	68	0.11	56	0.142	41	0.105	0.107	N	0.45	SignalP-noTM
NechaP55951	0.18	45	0.216	45	0.372	42	0.177	0.2	N	0.5	SignalP-TM
NechaP55935	0.113	11	0.11	31	0.128	11	0.106	0.108	N	0.45	SignalP-noTM
NechaP55924	0.159	34	0.18	34	0.357	20	0.186	0.183	N	0.45	SignalP-noTM
NechaP55927	0.143	23	0.145	39	0.265	35	0.151	0.148	N	0.5	SignalP-TM
NechaP55920	0.128	26	0.137	26	0.221	2	0.152	0.145	N	0.45	SignalP-noTM
NechaP98298	0.233	44	0.144	44	0.167	49	0.086	0.121	N	0.5	SignalP-TM
NechaP105756	0.144	22	0.139	22	0.165	19	0.133	0.136	N	0.45	SignalP-noTM
NechaP89079	0.148	27	0.217	27	0.42	14	0.319	0.258	N	0.5	SignalP-TM
NechaP55923	0.698	20	0.752	20	0.845	9	0.811	0.784	Y	0.45	SignalP-noTM
NechaP55950	0.154	43	0.128	43	0.134	42	0.106	0.116	N	0.45	SignalP-noTM
NechaP55948	0.107	21	0.104	25	0.125	15	0.1	0.102	N	0.45	SignalP-noTM
NechaP89066	0.123	22	0.12	22	0.154	17	0.117	0.118	N	0.45	SignalP-noTM
NechaP55916	0.108	28	0.105	28	0.115	13	0.102	0.103	N	0.45	SignalP-noTM
NechaP123039	0.685	19	0.753	19	0.892	13	0.814	0.786	Y	0.45	SignalP-noTM
NechaP19779	0.126	36	0.163	26	0.322	1	0.22	0.186	N	0.5	SignalP-TM
NechaP89070	0.215	28	0.172	28	0.278	1	0.144	0.157	N	0.45	SignalP-noTM
NechaP89060	0.12	37	0.111	37	0.134	7	0.104	0.107	N	0.45	SignalP-noTM
NechaP89063	0.743	20	0.833	20	0.977	11	0.934	0.888	Y	0.45	SignalP-noTM
NechaP55911	0.129	33	0.117	33	0.136	32	0.104	0.11	N	0.45	SignalP-noTM
NechaP89065	0.116	43	0.107	43	0.119	17	0.099	0.103	N	0.45	SignalP-noTM
NechaP55896	0.538	19	0.694	19	0.96	12	0.89	0.799	Y	0.45	SignalP-noTM
NechaP55898	0.152	36	0.144	36	0.242	5	0.149	0.146	N	0.45	SignalP-noTM
NechaP98289	0.739	21	0.704	21	0.773	7	0.662	0.681	Y	0.45	SignalP-noTM
NechaP102281	0.11	53	0.132	22	0.26	18	0.16	0.147	N	0.45	SignalP-noTM
NechaP89057	0.113	64	0.109	38	0.143	20	0.106	0.107	N	0.45	SignalP-noTM
NechaP89050	0.136	43	0.171	12	0.319	1	0.272	0.211	N	0.5	SignalP-TM
NechaP89051	0.128	28	0.113	28	0.118	7	0.101	0.106	N	0.45	SignalP-noTM
NechaP89052	0.116	19	0.134	19	0.178	8	0.152	0.144	N	0.45	SignalP-noTM
NechaP89036	0.109	54	0.108	54	0.12	22	0.105	0.107	N	0.45	SignalP-noTM
NechaP89037	0.358	21	0.555	21	0.943	12	0.854	0.717	Y	0.45	SignalP-noTM
NechaP89038	0.108	46	0.109	12	0.124	2	0.111	0.11	N	0.45	SignalP-noTM
NechaP89039	0.112	34	0.107	11	0.117	1	0.106	0.107	N	0.45	SignalP-noTM
NechaP89040	0.159	26	0.15	26	0.187	2	0.146	0.148	N	0.45	SignalP-noTM
NechaP89041	0.108	15	0.109	47	0.124	38	0.106	0.107	N	0.45	SignalP-noTM
NechaP89042	0.14	34	0.121	11	0.161	1	0.114	0.117	N	0.45	SignalP-noTM
NechaP89043	0.12	44	0.112	44	0.127	42	0.103	0.107	N	0.45	SignalP-noTM
NechaP89044	0.114	51	0.112	51	0.124	47	0.103	0.107	N	0.45	SignalP-noTM
NechaP89045	0.121	23	0.121	12	0.147	1	0.128	0.125	N	0.45	SignalP-noTM
NechaP89046	0.159	23	0.192	17	0.463	3	0.279	0.227	N	0.5	SignalP-TM
NechaP89048	0.112	38	0.107	38	0.125	16	0.101	0.104	N	0.45	SignalP-noTM
NechaP55889	0.112	29	0.116	52	0.192	50	0.116	0.116	N	0.45	SignalP-noTM
NechaP55879	0.109	33	0.104	67	0.126	5	0.1	0.102	N	0.45	SignalP-noTM
NechaP16483	0.159	36	0.192	23	0.372	2	0.268	0.222	N	0.5	SignalP-TM
NechaP55885	0.204	39	0.147	39	0.161	3	0.114	0.129	N	0.45	SignalP-noTM
NechaP89022	0.11	55	0.12	16	0.16	1	0.121	0.12	N	0.45	SignalP-noTM
NechaP89023	0.11	31	0.113	12	0.135	3	0.115	0.114	N	0.45	SignalP-noTM
NechaP98279	0.114	46	0.132	42	0.2	32	0.122	0.128	N	0.5	SignalP-TM
NechaP55883	0.11	56	0.111	65	0.175	52	0.092	0.103	N	0.5	SignalP-TM
NechaP55852	0.148	33	0.188	33	0.436	29	0.236	0.214	N	0.45	SignalP-noTM
NechaP55865	0.175	32	0.164	32	0.25	11	0.168	0.166	N	0.45	SignalP-noTM
NechaP12238	0.13	16	0.125	16	0.142	1	0.11	0.117	N	0.45	SignalP-noTM
NechaP98282	0.109	67	0.107	67	0.125	5	0.099	0.102	N	0.45	SignalP-noTM
NechaP89030	0.135	35	0.124	35	0.16	3	0.119	0.121	N	0.45	SignalP-noTM
NechaP89031	0.121	69	0.126	69	0.187	50	0.111	0.118	N	0.45	SignalP-noTM
NechaP55882	0.164	17	0.138	17	0.15	3	0.118	0.127	N	0.45	SignalP-noTM
NechaP98285	0.112	21	0.131	21	0.248	5	0.152	0.142	N	0.45	SignalP-noTM
NechaP98286	0.543	22	0.682	22	0.917	11	0.858	0.777	Y	0.45	SignalP-noTM
NechaP55867	0.134	24	0.116	24	0.127	35	0.1	0.107	N	0.45	SignalP-noTM
NechaP89035	0.456	20	0.625	20	0.897	2	0.857	0.75	Y	0.45	SignalP-noTM
NechaP55831	0.117	19	0.112	19	0.145	36	0.103	0.107	N	0.45	SignalP-noTM
NechaP55819	0.592	21	0.635	21	0.875	4	0.72	0.669	Y	0.5	SignalP-TM
NechaP55822	0.137	28	0.127	28	0.184	27	0.123	0.125	N	0.45	SignalP-noTM
NechaP55847	0.115	61	0.12	18	0.213	15	0.136	0.129	N	0.45	SignalP-noTM
NechaP55833	0.11	27	0.117	12	0.155	1	0.117	0.117	N	0.45	SignalP-noTM
NechaP55821	0.196	21	0.197	21	0.327	4	0.187	0.192	N	0.45	SignalP-noTM
NechaP55811	0.109	69	0.106	12	0.14	3	0.108	0.107	N	0.45	SignalP-noTM
NechaP89007	0.137	19	0.149	19	0.211	7	0.163	0.157	N	0.45	SignalP-noTM
NechaP73244	0.109	24	0.106	43	0.125	39	0.101	0.103	N	0.45	SignalP-noTM
NechaP55843	0.126	56	0.114	70	0.155	63	0.096	0.106	N	0.5	SignalP-TM
NechaP55834	0.336	23	0.275	23	0.287	7	0.236	0.259	N	0.5	SignalP-TM
NechaP102279	0.181	60	0.134	60	0.198	10	0.109	0.121	N	0.45	SignalP-noTM
NechaP73247	0.17	35	0.134	35	0.13	17	0.108	0.12	N	0.45	SignalP-noTM
NechaP55837	0.168	29	0.208	29	0.432	3	0.278	0.246	N	0.45	SignalP-noTM
NechaP89014	0.118	46	0.113	46	0.146	20	0.108	0.11	N	0.45	SignalP-noTM
NechaP89015	0.107	43	0.106	11	0.122	3	0.105	0.105	N	0.45	SignalP-noTM
NechaP89016	0.111	23	0.107	68	0.12	30	0.099	0.103	N	0.45	SignalP-noTM
NechaP98276	0.117	32	0.13	32	0.181	18	0.143	0.135	N	0.5	SignalP-TM
NechaP55814	0.12	23	0.153	11	0.254	1	0.185	0.17	N	0.45	SignalP-noTM
NechaP89019	0.562	20	0.642	20	0.819	14	0.732	0.691	Y	0.45	SignalP-noTM
NechaP88989	0.11	65	0.139	11	0.243	1	0.144	0.142	N	0.45	SignalP-noTM
NechaP88990	0.114	30	0.116	11	0.149	4	0.121	0.119	N	0.45	SignalP-noTM
NechaP88991	0.131	21	0.133	18	0.172	12	0.133	0.133	N	0.45	SignalP-noTM
NechaP88992	0.109	63	0.113	13	0.133	1	0.114	0.114	N	0.45	SignalP-noTM
NechaP98262	0.156	38	0.116	17	0.145	15	0.123	0.119	N	0.5	SignalP-TM
NechaP88994	0.163	38	0.177	38	0.282	20	0.202	0.187	N	0.5	SignalP-TM
NechaP55800	0.113	58	0.118	60	0.168	32	0.105	0.113	N	0.5	SignalP-TM
NechaP55806	0.341	32	0.297	32	0.367	20	0.234	0.272	N	0.5	SignalP-TM
NechaP55801	0.126	49	0.117	49	0.131	41	0.107	0.112	N	0.45	SignalP-noTM
NechaP88998	0.244	20	0.272	20	0.54	1	0.266	0.268	N	0.45	SignalP-noTM
NechaP55803	0.24	20	0.201	20	0.274	17	0.171	0.189	N	0.5	SignalP-TM
NechaP88967	0.108	46	0.104	46	0.11	22	0.098	0.101	N	0.45	SignalP-noTM
NechaP98255	0.175	54	0.192	54	0.324	50	0.136	0.17	N	0.5	SignalP-TM
NechaP88969	0.107	70	0.105	70	0.116	37	0.099	0.102	N	0.45	SignalP-noTM
NechaP1729	0.109	11	0.128	11	0.161	1	0.139	0.134	N	0.45	SignalP-noTM
NechaP98257	0.123	27	0.11	27	0.145	5	0.101	0.105	N	0.45	SignalP-noTM
NechaP55784	0.187	38	0.142	38	0.137	36	0.103	0.121	N	0.45	SignalP-noTM
NechaP88973	0.124	17	0.169	17	0.312	13	0.227	0.2	N	0.45	SignalP-noTM
NechaP102277	0.128	19	0.119	19	0.156	15	0.113	0.116	N	0.45	SignalP-noTM
NechaP88976	0.171	19	0.151	19	0.209	6	0.132	0.14	N	0.45	SignalP-noTM
NechaP19862	0.156	23	0.161	23	0.246	16	0.166	0.164	N	0.45	SignalP-noTM
NechaP88978	0.109	27	0.107	38	0.114	46	0.103	0.105	N	0.45	SignalP-noTM
NechaP88979	0.11	8	0.108	28	0.142	6	0.107	0.108	N	0.45	SignalP-noTM
NechaP19302	0.324	16	0.52	16	0.882	2	0.821	0.682	Y	0.45	SignalP-noTM
NechaP88981	0.761	20	0.336	20	0.182	13	0.146	0.234	N	0.45	SignalP-noTM
NechaP88982	0.866	25	0.907	25	0.983	15	0.947	0.929	Y	0.45	SignalP-noTM
NechaP55795	0.13	19	0.179	11	0.369	1	0.23	0.207	N	0.45	SignalP-noTM
NechaP88984	0.185	37	0.152	37	0.189	8	0.134	0.142	N	0.45	SignalP-noTM
NechaP88985	0.238	30	0.235	30	0.407	8	0.254	0.245	N	0.45	SignalP-noTM
NechaP88986	0.242	62	0.155	62	0.113	42	0.098	0.124	N	0.45	SignalP-noTM
NechaP88987	0.108	14	0.106	62	0.128	50	0.1	0.103	N	0.45	SignalP-noTM
NechaP55774	0.11	26	0.114	67	0.179	51	0.11	0.112	N	0.45	SignalP-noTM
NechaP88965	0.249	50	0.179	50	0.24	8	0.133	0.154	N	0.45	SignalP-noTM
NechaP88966	0.129	16	0.118	56	0.199	44	0.115	0.116	N	0.45	SignalP-noTM
NechaP88953	0.116	41	0.125	41	0.159	34	0.116	0.121	N	0.5	SignalP-TM
NechaP55758	0.13	35	0.115	12	0.149	5	0.121	0.118	N	0.45	SignalP-noTM
NechaP88957	0.12	29	0.142	29	0.267	13	0.171	0.157	N	0.45	SignalP-noTM
NechaP98253	0.143	24	0.211	11	0.593	5	0.455	0.308	N	0.5	SignalP-TM
NechaP55741	0.108	50	0.142	11	0.246	1	0.172	0.154	N	0.5	SignalP-TM
NechaP88959	0.18	24	0.208	11	0.533	4	0.414	0.29	N	0.5	SignalP-TM
NechaP64958	0.335	18	0.516	18	0.839	2	0.791	0.664	Y	0.45	SignalP-noTM
NechaP88961	0.118	27	0.121	27	0.181	55	0.112	0.118	N	0.5	SignalP-TM
NechaP88962	0.112	52	0.121	11	0.168	1	0.122	0.122	N	0.45	SignalP-noTM
NechaP55739	0.11	27	0.116	20	0.149	7	0.123	0.12	N	0.45	SignalP-noTM
NechaP55738	0.162	54	0.132	42	0.224	36	0.132	0.132	N	0.5	SignalP-TM
NechaP88923	0.62	28	0.743	28	0.988	15	0.901	0.828	Y	0.45	SignalP-noTM
NechaP55718	0.145	57	0.123	36	0.17	34	0.124	0.124	N	0.45	SignalP-noTM
NechaP88925	0.338	19	0.219	12	0.482	1	0.29	0.247	N	0.5	SignalP-TM
NechaP55713	0.111	22	0.14	11	0.25	4	0.169	0.156	N	0.45	SignalP-noTM
NechaP55705	0.129	35	0.114	35	0.137	12	0.106	0.11	N	0.45	SignalP-noTM
NechaP19679	0.25	58	0.244	11	0.704	3	0.483	0.373	N	0.45	SignalP-noTM
NechaP19938	0.108	58	0.104	58	0.117	12	0.098	0.101	N	0.45	SignalP-noTM
NechaP55702	0.14	43	0.158	43	0.273	16	0.176	0.168	N	0.45	SignalP-noTM
NechaP55699	0.171	21	0.149	21	0.214	20	0.126	0.137	N	0.45	SignalP-noTM
NechaP88930	0.151	18	0.119	18	0.131	23	0.093	0.105	N	0.45	SignalP-noTM
NechaP55696	0.112	36	0.108	68	0.145	48	0.097	0.102	N	0.45	SignalP-noTM
NechaP55715	0.139	19	0.15	11	0.265	1	0.15	0.15	N	0.45	SignalP-noTM
NechaP88932	0.163	19	0.355	19	0.842	1	0.758	0.573	Y	0.45	SignalP-noTM
NechaP98244	0.108	35	0.102	35	0.112	22	0.095	0.098	N	0.45	SignalP-noTM
NechaP55706	0.11	66	0.105	66	0.114	35	0.096	0.1	N	0.45	SignalP-noTM
NechaP98245	0.122	42	0.14	11	0.229	3	0.161	0.152	N	0.45	SignalP-noTM
NechaP88936	0.197	32	0.146	47	0.299	43	0.118	0.135	N	0.5	SignalP-TM
NechaP98246	0.173	22	0.181	22	0.269	3	0.206	0.191	N	0.5	SignalP-TM
NechaP55724	0.143	50	0.12	50	0.119	55	0.095	0.107	N	0.45	SignalP-noTM
NechaP88939	0.11	24	0.104	51	0.114	38	0.095	0.099	N	0.45	SignalP-noTM
NechaP88940	0.168	28	0.295	20	0.659	4	0.547	0.396	N	0.5	SignalP-TM
NechaP88941	0.258	16	0.167	16	0.144	20	0.106	0.134	N	0.45	SignalP-noTM
NechaP55729	0.165	36	0.131	36	0.14	35	0.108	0.119	N	0.45	SignalP-noTM
NechaP55732	0.122	29	0.118	15	0.164	3	0.12	0.119	N	0.45	SignalP-noTM
NechaP98248	0.111	69	0.113	11	0.143	5	0.117	0.115	N	0.45	SignalP-noTM
NechaP88944	0.108	12	0.112	12	0.133	3	0.11	0.111	N	0.45	SignalP-noTM
NechaP88946	0.11	52	0.112	11	0.126	1	0.108	0.11	N	0.45	SignalP-noTM
NechaP88947	0.446	21	0.547	21	0.78	9	0.667	0.611	Y	0.45	SignalP-noTM
NechaP88948	0.11	36	0.114	58	0.154	50	0.107	0.11	N	0.45	SignalP-noTM
NechaP88949	0.111	45	0.109	45	0.125	31	0.099	0.104	N	0.45	SignalP-noTM
NechaP88950	0.111	21	0.114	27	0.163	27	0.117	0.116	N	0.45	SignalP-noTM
NechaP88951	0.113	27	0.106	11	0.116	1	0.105	0.106	N	0.45	SignalP-noTM
NechaP88894	0.143	28	0.138	28	0.194	9	0.139	0.138	N	0.45	SignalP-noTM
NechaP55651	0.121	30	0.127	38	0.26	35	0.136	0.132	N	0.45	SignalP-noTM
NechaP55675	0.11	70	0.105	70	0.11	20	0.096	0.1	N	0.45	SignalP-noTM
NechaP98227	0.15	18	0.127	18	0.175	13	0.113	0.119	N	0.45	SignalP-noTM
NechaP55674	0.11	19	0.102	68	0.112	18	0.095	0.099	N	0.45	SignalP-noTM
NechaP88899	0.151	32	0.251	11	0.736	3	0.59	0.386	N	0.5	SignalP-TM
NechaP88900	0.138	27	0.155	27	0.273	36	0.178	0.167	N	0.45	SignalP-noTM
NechaP55688	0.13	24	0.146	12	0.235	1	0.159	0.153	N	0.45	SignalP-noTM
NechaP88902	0.135	46	0.119	46	0.135	40	0.1	0.109	N	0.45	SignalP-noTM
NechaP55653	0.195	35	0.144	35	0.124	4	0.109	0.125	N	0.45	SignalP-noTM
NechaP88904	0.117	68	0.108	68	0.13	12	0.102	0.105	N	0.45	SignalP-noTM
NechaP88905	0.249	35	0.276	35	0.651	12	0.359	0.321	N	0.45	SignalP-noTM
NechaP98229	0.152	16	0.209	16	0.429	2	0.258	0.236	N	0.45	SignalP-noTM
NechaP55691	0.112	26	0.117	13	0.148	9	0.124	0.12	N	0.45	SignalP-noTM
NechaP55648	0.151	53	0.125	53	0.169	1	0.103	0.113	N	0.45	SignalP-noTM
NechaP55673	0.109	30	0.109	44	0.132	40	0.106	0.107	N	0.45	SignalP-noTM
NechaP55679	0.128	32	0.138	18	0.172	10	0.153	0.146	N	0.45	SignalP-noTM
NechaP55664	0.119	37	0.109	14	0.12	8	0.111	0.11	N	0.45	SignalP-noTM
NechaP88912	0.108	23	0.121	11	0.152	1	0.125	0.123	N	0.45	SignalP-noTM
NechaP88913	0.814	20	0.71	20	0.75	13	0.607	0.655	Y	0.45	SignalP-noTM
NechaP106595	0.138	19	0.12	19	0.117	2	0.103	0.111	N	0.45	SignalP-noTM
NechaP88916	0.815	19	0.872	19	0.976	10	0.926	0.901	Y	0.45	SignalP-noTM
NechaP55652	0.114	55	0.11	55	0.12	3	0.103	0.106	N	0.45	SignalP-noTM
NechaP55683	0.141	35	0.117	35	0.113	7	0.098	0.107	N	0.45	SignalP-noTM
NechaP55695	0.113	51	0.126	14	0.174	1	0.131	0.128	N	0.45	SignalP-noTM
NechaP88920	0.113	19	0.12	19	0.139	8	0.127	0.124	N	0.45	SignalP-noTM
NechaP73240	0.111	39	0.112	12	0.136	6	0.113	0.113	N	0.45	SignalP-noTM
NechaP98240	0.641	21	0.404	21	0.448	1	0.236	0.313	N	0.45	SignalP-noTM
NechaP106594	0.225	25	0.29	25	0.595	9	0.38	0.339	N	0.45	SignalP-noTM
NechaP55638	0.141	30	0.212	16	0.699	3	0.389	0.308	N	0.45	SignalP-noTM
NechaP88889	0.816	28	0.844	28	0.943	18	0.87	0.858	Y	0.45	SignalP-noTM
NechaP88890	0.807	22	0.85	22	0.956	4	0.896	0.875	Y	0.45	SignalP-noTM
NechaP55641	0.185	23	0.273	23	0.584	14	0.403	0.343	N	0.45	SignalP-noTM
NechaP98226	0.12	21	0.118	11	0.17	1	0.125	0.121	N	0.5	SignalP-TM
NechaP88893	0.15	20	0.141	20	0.214	48	0.132	0.136	N	0.45	SignalP-noTM
NechaP64954	0.125	45	0.121	59	0.183	49	0.113	0.117	N	0.45	SignalP-noTM
NechaP88879	0.109	48	0.109	44	0.118	27	0.101	0.105	N	0.45	SignalP-noTM
NechaP88881	0.11	64	0.107	11	0.115	1	0.102	0.104	N	0.45	SignalP-noTM
NechaP88882	0.108	43	0.109	70	0.132	53	0.103	0.106	N	0.45	SignalP-noTM
NechaP55625	0.127	47	0.132	11	0.198	1	0.125	0.129	N	0.45	SignalP-noTM
NechaP88884	0.118	19	0.125	19	0.197	14	0.133	0.129	N	0.45	SignalP-noTM
NechaP88886	0.116	45	0.126	58	0.196	48	0.112	0.121	N	0.5	SignalP-TM
NechaP88877	0.112	57	0.112	57	0.14	43	0.108	0.11	N	0.45	SignalP-noTM
NechaP88878	0.136	53	0.131	53	0.158	47	0.122	0.126	N	0.45	SignalP-noTM
NechaP55623	0.108	21	0.102	56	0.109	51	0.096	0.099	N	0.45	SignalP-noTM
NechaP88874	0.125	55	0.109	11	0.137	1	0.099	0.103	N	0.45	SignalP-noTM
NechaP55615	0.109	34	0.106	24	0.141	11	0.107	0.107	N	0.45	SignalP-noTM
NechaP55617	0.114	18	0.107	18	0.124	7	0.102	0.104	N	0.45	SignalP-noTM
NechaP88875	0.11	31	0.132	11	0.207	1	0.144	0.138	N	0.45	SignalP-noTM
NechaP88811	0.125	55	0.109	11	0.14	1	0.1	0.104	N	0.45	SignalP-noTM
NechaP55600	0.111	61	0.107	61	0.12	28	0.1	0.104	N	0.45	SignalP-noTM
NechaP88814	0.119	43	0.106	43	0.12	55	0.095	0.1	N	0.45	SignalP-noTM
NechaP88815	0.113	64	0.105	64	0.12	36	0.098	0.101	N	0.45	SignalP-noTM
NechaP55610	0.12	22	0.11	50	0.123	31	0.102	0.106	N	0.45	SignalP-noTM
NechaP88817	0.112	40	0.109	23	0.139	5	0.112	0.11	N	0.45	SignalP-noTM
NechaP88818	0.109	67	0.105	13	0.116	3	0.103	0.104	N	0.45	SignalP-noTM
NechaP88819	0.109	34	0.107	34	0.121	28	0.102	0.104	N	0.45	SignalP-noTM
NechaP88820	0.109	55	0.107	55	0.143	44	0.103	0.105	N	0.45	SignalP-noTM
NechaP55608	0.127	22	0.117	22	0.144	2	0.107	0.111	N	0.45	SignalP-noTM
NechaP88822	0.162	32	0.143	32	0.224	37	0.132	0.137	N	0.45	SignalP-noTM
NechaP88823	0.127	47	0.118	47	0.197	46	0.104	0.11	N	0.45	SignalP-noTM
NechaP88824	0.108	30	0.105	29	0.116	11	0.101	0.103	N	0.45	SignalP-noTM
NechaP88825	0.316	32	0.32	32	0.543	6	0.35	0.336	N	0.45	SignalP-noTM
NechaP88826	0.129	35	0.138	11	0.246	7	0.183	0.162	N	0.45	SignalP-noTM
NechaP88827	0.272	27	0.174	27	0.145	54	0.115	0.142	N	0.45	SignalP-noTM
NechaP88828	0.109	59	0.109	12	0.136	4	0.111	0.11	N	0.45	SignalP-noTM
NechaP88829	0.107	24	0.101	38	0.106	55	0.094	0.097	N	0.45	SignalP-noTM
NechaP88830	0.13	50	0.147	50	0.369	47	0.132	0.139	N	0.45	SignalP-noTM
NechaP88831	0.179	34	0.134	34	0.152	2	0.104	0.118	N	0.45	SignalP-noTM
NechaP88832	0.109	64	0.104	64	0.11	32	0.095	0.099	N	0.45	SignalP-noTM
NechaP55614	0.148	21	0.133	21	0.207	19	0.119	0.125	N	0.45	SignalP-noTM
NechaP88834	0.112	30	0.108	30	0.114	15	0.103	0.105	N	0.45	SignalP-noTM
NechaP88837	0.109	45	0.117	12	0.147	5	0.126	0.122	N	0.45	SignalP-noTM
NechaP88838	0.16	41	0.128	41	0.154	36	0.103	0.115	N	0.45	SignalP-noTM
NechaP88839	0.109	61	0.105	61	0.122	40	0.099	0.101	N	0.45	SignalP-noTM
NechaP88840	0.318	19	0.293	19	0.442	1	0.285	0.29	N	0.5	SignalP-TM
NechaP88841	0.107	52	0.107	52	0.128	40	0.1	0.103	N	0.45	SignalP-noTM
NechaP88842	0.107	49	0.109	23	0.13	41	0.106	0.108	N	0.5	SignalP-TM
NechaP88843	0.157	20	0.283	16	0.729	3	0.591	0.406	N	0.5	SignalP-TM
NechaP88844	0.165	55	0.141	55	0.138	53	0.109	0.124	N	0.45	SignalP-noTM
NechaP88845	0.351	25	0.398	25	0.614	3	0.46	0.432	N	0.45	SignalP-noTM
NechaP88846	0.199	50	0.221	50	0.428	41	0.178	0.198	N	0.45	SignalP-noTM
NechaP88847	0.11	46	0.121	11	0.152	1	0.127	0.124	N	0.45	SignalP-noTM
NechaP88848	0.108	60	0.117	11	0.155	1	0.111	0.114	N	0.45	SignalP-noTM
NechaP102273	0.119	19	0.112	31	0.142	27	0.114	0.113	N	0.45	SignalP-noTM
NechaP88850	0.121	22	0.105	22	0.111	60	0.091	0.098	N	0.45	SignalP-noTM
NechaP88852	0.111	30	0.117	11	0.147	1	0.13	0.124	N	0.45	SignalP-noTM
NechaP88853	0.181	24	0.258	24	0.536	14	0.371	0.319	N	0.45	SignalP-noTM
NechaP88854	0.118	35	0.107	35	0.125	45	0.096	0.101	N	0.45	SignalP-noTM
NechaP88855	0.14	47	0.238	47	0.696	43	0.249	0.244	N	0.45	SignalP-noTM
NechaP88856	0.109	70	0.105	70	0.116	23	0.097	0.101	N	0.45	SignalP-noTM
NechaP88857	0.324	21	0.212	21	0.247	18	0.135	0.171	N	0.45	SignalP-noTM
NechaP88858	0.112	23	0.111	42	0.139	3	0.107	0.109	N	0.45	SignalP-noTM
NechaP88859	0.11	62	0.11	49	0.129	5	0.106	0.109	N	0.5	SignalP-TM
NechaP88860	0.112	66	0.11	66	0.112	47	0.099	0.104	N	0.45	SignalP-noTM
NechaP88861	0.117	62	0.106	62	0.112	29	0.094	0.099	N	0.45	SignalP-noTM
NechaP88862	0.147	36	0.132	36	0.168	5	0.12	0.126	N	0.45	SignalP-noTM
NechaP88863	0.127	33	0.114	33	0.166	32	0.103	0.108	N	0.45	SignalP-noTM
NechaP88864	0.154	19	0.12	19	0.113	39	0.091	0.105	N	0.45	SignalP-noTM
NechaP88865	0.116	57	0.107	57	0.116	54	0.098	0.102	N	0.45	SignalP-noTM
NechaP88866	0.108	60	0.101	60	0.105	34	0.093	0.097	N	0.45	SignalP-noTM
NechaP88867	0.126	38	0.113	38	0.121	45	0.099	0.105	N	0.45	SignalP-noTM
NechaP88868	0.11	25	0.103	61	0.114	55	0.095	0.099	N	0.45	SignalP-noTM
NechaP88869	0.113	36	0.113	11	0.14	1	0.101	0.107	N	0.45	SignalP-noTM
NechaP88870	0.143	22	0.159	22	0.292	1	0.172	0.166	N	0.45	SignalP-noTM
NechaP88871	0.288	20	0.276	20	0.571	18	0.26	0.267	N	0.45	SignalP-noTM
NechaP88735	0.534	19	0.684	19	0.95	11	0.88	0.79	Y	0.45	SignalP-noTM
NechaP55529	0.116	18	0.106	18	0.116	41	0.096	0.101	N	0.45	SignalP-noTM
NechaP106589	0.126	36	0.113	36	0.125	2	0.102	0.107	N	0.45	SignalP-noTM
NechaP88738	0.631	22	0.71	22	0.893	1	0.795	0.756	Y	0.45	SignalP-noTM
NechaP88739	0.142	50	0.128	50	0.181	48	0.104	0.115	N	0.45	SignalP-noTM
NechaP106590	0.466	24	0.644	24	0.96	13	0.888	0.776	Y	0.45	SignalP-noTM
NechaP106591	0.373	20	0.576	20	0.945	3	0.89	0.746	Y	0.45	SignalP-noTM
NechaP55494	0.265	16	0.416	16	0.734	15	0.655	0.545	Y	0.45	SignalP-noTM
NechaP88743	0.284	66	0.164	66	0.111	8	0.097	0.128	N	0.45	SignalP-noTM
NechaP55547	0.196	30	0.15	30	0.236	26	0.109	0.128	N	0.45	SignalP-noTM
NechaP98192	0.207	41	0.255	41	0.452	33	0.213	0.238	N	0.5	SignalP-TM
NechaP14316	0.176	28	0.156	28	0.212	4	0.145	0.15	N	0.45	SignalP-noTM
NechaP55546	0.128	16	0.108	16	0.129	40	0.095	0.101	N	0.45	SignalP-noTM
NechaP55588	0.149	20	0.143	20	0.21	1	0.126	0.134	N	0.45	SignalP-noTM
NechaP55517	0.148	29	0.123	29	0.158	1	0.107	0.114	N	0.45	SignalP-noTM
NechaP55503	0.179	33	0.151	33	0.172	24	0.134	0.142	N	0.45	SignalP-noTM
NechaP88750	0.182	17	0.181	17	0.219	3	0.173	0.177	N	0.45	SignalP-noTM
NechaP55545	0.111	31	0.121	11	0.152	1	0.12	0.12	N	0.45	SignalP-noTM
NechaP98197	0.113	36	0.109	28	0.141	9	0.107	0.108	N	0.45	SignalP-noTM
NechaP55491	0.108	7	0.106	16	0.13	7	0.107	0.107	N	0.45	SignalP-noTM
NechaP18539	0.15	11	0.18	11	0.429	10	0.257	0.221	N	0.45	SignalP-noTM
NechaP98200	0.118	42	0.114	23	0.13	40	0.113	0.113	N	0.45	SignalP-noTM
NechaP88757	0.108	34	0.102	34	0.111	49	0.093	0.097	N	0.45	SignalP-noTM
NechaP55490	0.123	34	0.101	23	0.113	14	0.091	0.097	N	0.5	SignalP-TM
NechaP55532	0.128	29	0.112	29	0.121	34	0.101	0.106	N	0.45	SignalP-noTM
NechaP98203	0.129	60	0.112	60	0.119	33	0.102	0.107	N	0.45	SignalP-noTM
NechaP55481	0.217	68	0.149	68	0.152	67	0.095	0.128	N	0.5	SignalP-TM
NechaP88762	0.142	33	0.132	13	0.188	6	0.164	0.149	N	0.45	SignalP-noTM
NechaP88763	0.193	17	0.344	17	0.698	1	0.58	0.471	Y	0.45	SignalP-noTM
NechaP55523	0.11	38	0.104	66	0.113	1	0.096	0.1	N	0.45	SignalP-noTM
NechaP55539	0.121	26	0.111	26	0.124	3	0.103	0.107	N	0.45	SignalP-noTM
NechaP88767	0.134	20	0.128	20	0.149	11	0.122	0.125	N	0.45	SignalP-noTM
NechaP19236	0.192	36	0.142	36	0.145	35	0.103	0.121	N	0.45	SignalP-noTM
NechaP88769	0.152	22	0.157	22	0.22	12	0.161	0.159	N	0.45	SignalP-noTM
NechaP88770	0.158	20	0.13	20	0.146	3	0.103	0.115	N	0.45	SignalP-noTM
NechaP88771	0.136	18	0.149	18	0.226	1	0.144	0.146	N	0.45	SignalP-noTM
NechaP88772	0.112	52	0.104	70	0.113	62	0.099	0.101	N	0.45	SignalP-noTM
NechaP102270	0.114	24	0.118	24	0.138	12	0.122	0.12	N	0.45	SignalP-noTM
NechaP55526	0.115	10	0.106	40	0.116	3	0.097	0.101	N	0.45	SignalP-noTM
NechaP98210	0.11	12	0.109	12	0.129	11	0.109	0.109	N	0.45	SignalP-noTM
NechaP55522	0.115	35	0.106	35	0.113	32	0.097	0.102	N	0.45	SignalP-noTM
NechaP98211	0.15	27	0.139	12	0.248	1	0.133	0.136	N	0.45	SignalP-noTM
NechaP55510	0.166	23	0.134	23	0.147	2	0.108	0.12	N	0.45	SignalP-noTM
NechaP88779	0.197	33	0.16	33	0.31	31	0.154	0.158	N	0.5	SignalP-TM
NechaP88780	0.168	25	0.137	25	0.237	43	0.117	0.126	N	0.45	SignalP-noTM
NechaP55495	0.117	38	0.12	13	0.234	34	0.126	0.123	N	0.45	SignalP-noTM
NechaP88782	0.126	47	0.118	11	0.146	1	0.118	0.118	N	0.45	SignalP-noTM
NechaP88783	0.164	30	0.162	11	0.298	7	0.242	0.194	N	0.5	SignalP-TM
NechaP55493	0.105	48	0.125	65	0.174	43	0.117	0.122	N	0.5	SignalP-TM
NechaP55576	0.109	58	0.107	51	0.126	46	0.101	0.104	N	0.45	SignalP-noTM
NechaP88786	0.226	22	0.196	22	0.249	20	0.169	0.182	N	0.45	SignalP-noTM
NechaP98215	0.382	30	0.378	30	0.559	13	0.416	0.393	N	0.5	SignalP-TM
NechaP55518	0.107	31	0.111	14	0.142	13	0.113	0.112	N	0.45	SignalP-noTM
NechaP88789	0.137	29	0.128	11	0.192	2	0.145	0.137	N	0.45	SignalP-noTM
NechaP98216	0.142	18	0.124	18	0.129	17	0.106	0.114	N	0.45	SignalP-noTM
NechaP98217	0.121	24	0.143	11	0.225	1	0.172	0.159	N	0.45	SignalP-noTM
NechaP55556	0.183	36	0.133	36	0.131	3	0.102	0.116	N	0.45	SignalP-noTM
NechaP55574	0.144	20	0.151	20	0.284	13	0.158	0.155	N	0.45	SignalP-noTM
NechaP88793	0.277	20	0.428	20	0.852	11	0.64	0.542	Y	0.45	SignalP-noTM
NechaP88794	0.11	30	0.106	70	0.115	63	0.1	0.103	N	0.45	SignalP-noTM
NechaP106593	0.114	26	0.109	11	0.128	1	0.105	0.107	N	0.45	SignalP-noTM
NechaP55554	0.11	69	0.116	69	0.177	55	0.105	0.111	N	0.5	SignalP-TM
NechaP55541	0.158	37	0.127	37	0.15	36	0.098	0.111	N	0.45	SignalP-noTM
NechaP88798	0.113	33	0.113	12	0.126	3	0.115	0.114	N	0.45	SignalP-noTM
NechaP55537	0.146	39	0.165	11	0.315	1	0.192	0.179	N	0.45	SignalP-noTM
NechaP55504	0.327	20	0.326	20	0.593	16	0.324	0.325	N	0.45	SignalP-noTM
NechaP88801	0.11	66	0.107	66	0.116	22	0.103	0.105	N	0.45	SignalP-noTM
NechaP88802	0.127	55	0.134	55	0.225	48	0.123	0.128	N	0.45	SignalP-noTM
NechaP88803	0.11	40	0.109	42	0.115	38	0.103	0.106	N	0.45	SignalP-noTM
NechaP88804	0.118	19	0.104	42	0.114	56	0.094	0.099	N	0.45	SignalP-noTM
NechaP88805	0.112	21	0.116	21	0.156	12	0.122	0.119	N	0.45	SignalP-noTM
NechaP88806	0.113	57	0.111	12	0.144	2	0.111	0.111	N	0.45	SignalP-noTM
NechaP88807	0.212	23	0.289	23	0.519	1	0.401	0.334	N	0.5	SignalP-TM
NechaP88808	0.11	11	0.13	11	0.182	1	0.119	0.124	N	0.45	SignalP-noTM
NechaP9732	0.143	23	0.124	23	0.131	12	0.108	0.116	N	0.45	SignalP-noTM
NechaP88663	0.162	31	0.149	31	0.187	20	0.142	0.145	N	0.45	SignalP-noTM
NechaP55411	0.107	16	0.104	26	0.111	4	0.1	0.102	N	0.45	SignalP-noTM
NechaP55410	0.556	27	0.698	27	0.974	16	0.88	0.796	Y	0.45	SignalP-noTM
NechaP88666	0.368	23	0.481	23	0.797	20	0.629	0.561	Y	0.45	SignalP-noTM
NechaP88667	0.164	24	0.153	24	0.184	12	0.143	0.148	N	0.45	SignalP-noTM
NechaP55414	0.113	63	0.122	11	0.208	3	0.158	0.141	N	0.45	SignalP-noTM
NechaP15991	0.207	21	0.214	21	0.423	1	0.201	0.207	N	0.45	SignalP-noTM
NechaP55419	0.116	43	0.136	43	0.249	39	0.134	0.135	N	0.5	SignalP-TM
NechaP55434	0.161	19	0.183	19	0.327	18	0.203	0.194	N	0.45	SignalP-noTM
NechaP5061	0.163	15	0.193	15	0.315	14	0.217	0.206	N	0.45	SignalP-noTM
NechaP88673	0.114	28	0.129	11	0.257	5	0.184	0.158	N	0.45	SignalP-noTM
NechaP88674	0.113	20	0.111	30	0.157	16	0.099	0.106	N	0.5	SignalP-TM
NechaP88675	0.202	18	0.278	18	0.497	1	0.35	0.317	N	0.45	SignalP-noTM
NechaP88676	0.123	64	0.136	21	0.255	11	0.166	0.152	N	0.45	SignalP-noTM
NechaP88677	0.111	49	0.115	21	0.179	13	0.126	0.121	N	0.45	SignalP-noTM
NechaP88678	0.136	60	0.116	60	0.125	31	0.102	0.108	N	0.45	SignalP-noTM
NechaP16163	0.12	49	0.136	11	0.195	1	0.156	0.147	N	0.45	SignalP-noTM
NechaP55406	0.135	35	0.163	35	0.318	29	0.154	0.159	N	0.5	SignalP-TM
NechaP88680	0.138	22	0.135	11	0.199	1	0.136	0.136	N	0.45	SignalP-noTM
NechaP55433	0.17	26	0.181	26	0.292	5	0.189	0.185	N	0.45	SignalP-noTM
NechaP19041	0.124	27	0.168	11	0.297	4	0.251	0.213	N	0.45	SignalP-noTM
NechaP19119	0.109	28	0.103	28	0.118	11	0.098	0.101	N	0.45	SignalP-noTM
NechaP88683	0.108	24	0.109	24	0.129	12	0.109	0.109	N	0.45	SignalP-noTM
NechaP88684	0.486	36	0.496	36	0.734	27	0.438	0.473	N	0.5	SignalP-TM
NechaP88685	0.112	45	0.106	37	0.113	24	0.098	0.102	N	0.45	SignalP-noTM
NechaP88686	0.13	51	0.116	51	0.139	47	0.099	0.107	N	0.45	SignalP-noTM
NechaP88687	0.185	25	0.171	53	0.56	43	0.175	0.173	N	0.45	SignalP-noTM
NechaP88688	0.159	47	0.162	23	0.325	11	0.205	0.179	N	0.5	SignalP-TM
NechaP88689	0.108	64	0.104	39	0.11	34	0.098	0.1	N	0.45	SignalP-noTM
NechaP88690	0.137	54	0.142	38	0.257	35	0.126	0.136	N	0.5	SignalP-TM
NechaP88691	0.306	28	0.183	28	0.212	50	0.118	0.148	N	0.45	SignalP-noTM
NechaP88692	0.116	34	0.148	34	0.232	21	0.172	0.158	N	0.5	SignalP-TM
NechaP88694	0.121	34	0.168	34	0.355	8	0.244	0.209	N	0.45	SignalP-noTM
NechaP88695	0.206	23	0.242	23	0.481	2	0.286	0.266	N	0.45	SignalP-noTM
NechaP88696	0.134	49	0.118	49	0.127	48	0.105	0.111	N	0.45	SignalP-noTM
NechaP88697	0.115	23	0.108	23	0.123	13	0.101	0.104	N	0.45	SignalP-noTM
NechaP88698	0.107	70	0.103	70	0.116	59	0.088	0.097	N	0.5	SignalP-TM
NechaP88699	0.139	17	0.122	17	0.129	12	0.108	0.114	N	0.45	SignalP-noTM
NechaP102268	0.128	36	0.112	36	0.12	1	0.099	0.105	N	0.45	SignalP-noTM
NechaP9612	0.356	41	0.254	41	0.364	33	0.156	0.201	N	0.45	SignalP-noTM
NechaP88702	0.186	66	0.137	66	0.152	1	0.101	0.117	N	0.45	SignalP-noTM
NechaP55441	0.11	68	0.116	11	0.141	1	0.118	0.117	N	0.45	SignalP-noTM
NechaP102269	0.492	45	0.573	20	0.835	6	0.751	0.669	Y	0.45	SignalP-noTM
NechaP88705	0.113	17	0.112	29	0.149	15	0.112	0.112	N	0.45	SignalP-noTM
NechaP88706	0.281	22	0.494	22	0.95	4	0.865	0.694	Y	0.45	SignalP-noTM
NechaP88707	0.111	59	0.115	11	0.16	3	0.128	0.122	N	0.45	SignalP-noTM
NechaP88708	0.134	18	0.114	45	0.143	33	0.111	0.112	N	0.5	SignalP-TM
NechaP88709	0.125	40	0.114	40	0.134	41	0.101	0.107	N	0.45	SignalP-noTM
NechaP88710	0.11	45	0.107	23	0.132	7	0.104	0.105	N	0.45	SignalP-noTM
NechaP98184	0.134	23	0.172	23	0.305	1	0.222	0.199	N	0.45	SignalP-noTM
NechaP55444	0.126	21	0.133	21	0.183	16	0.14	0.137	N	0.45	SignalP-noTM
NechaP88713	0.11	56	0.105	19	0.125	12	0.102	0.103	N	0.45	SignalP-noTM
NechaP88714	0.176	20	0.368	20	0.851	17	0.761	0.58	Y	0.45	SignalP-noTM
NechaP55446	0.109	56	0.112	13	0.127	3	0.114	0.113	N	0.45	SignalP-noTM
NechaP88716	0.27	21	0.379	21	0.669	18	0.533	0.462	Y	0.45	SignalP-noTM
NechaP88717	0.693	21	0.804	21	0.979	14	0.933	0.874	Y	0.45	SignalP-noTM
NechaP55443	0.157	17	0.124	17	0.107	38	0.094	0.108	N	0.45	SignalP-noTM
NechaP55449	0.107	27	0.108	53	0.131	11	0.105	0.106	N	0.45	SignalP-noTM
NechaP55457	0.14	55	0.128	66	0.226	54	0.106	0.12	N	0.5	SignalP-TM
NechaP55460	0.632	19	0.751	19	0.929	10	0.892	0.827	Y	0.45	SignalP-noTM
NechaP55464	0.132	59	0.237	19	0.646	1	0.48	0.334	N	0.5	SignalP-TM
NechaP55462	0.119	48	0.152	11	0.314	4	0.185	0.17	N	0.45	SignalP-noTM
NechaP55455	0.118	33	0.153	33	0.221	34	0.156	0.155	N	0.5	SignalP-TM
NechaP88725	0.117	50	0.122	50	0.172	39	0.115	0.118	N	0.45	SignalP-noTM
NechaP106586	0.112	27	0.141	27	0.239	13	0.176	0.16	N	0.45	SignalP-noTM
NechaP106587	0.823	19	0.884	19	0.977	2	0.944	0.916	Y	0.45	SignalP-noTM
NechaP88727	0.132	55	0.154	12	0.274	2	0.181	0.168	N	0.45	SignalP-noTM
NechaP55459	0.131	38	0.122	12	0.171	3	0.138	0.13	N	0.45	SignalP-noTM
NechaP88729	0.108	48	0.105	62	0.131	41	0.099	0.102	N	0.45	SignalP-noTM
NechaP88731	0.111	46	0.114	12	0.137	1	0.108	0.11	N	0.45	SignalP-noTM
NechaP19452	0.143	33	0.125	33	0.144	5	0.111	0.117	N	0.45	SignalP-noTM
NechaP88347	0.133	25	0.115	25	0.174	32	0.101	0.108	N	0.45	SignalP-noTM
NechaP88348	0.111	46	0.114	12	0.137	1	0.108	0.11	N	0.45	SignalP-noTM
NechaP88350	0.108	48	0.105	62	0.131	41	0.099	0.102	N	0.45	SignalP-noTM
NechaP55044	0.131	38	0.122	12	0.171	3	0.138	0.13	N	0.45	SignalP-noTM
NechaP55089	0.44	43	0.214	43	0.149	37	0.098	0.151	N	0.45	SignalP-noTM
NechaP88354	0.111	49	0.104	49	0.121	6	0.097	0.1	N	0.45	SignalP-noTM
NechaP102241	0.116	37	0.105	37	0.11	60	0.093	0.098	N	0.45	SignalP-noTM
NechaP98095	0.384	37	0.213	37	0.288	7	0.171	0.196	N	0.5	SignalP-TM
NechaP55048	0.474	26	0.302	26	0.359	2	0.199	0.261	N	0.5	SignalP-TM
NechaP22487	0.111	58	0.123	11	0.163	1	0.125	0.124	N	0.45	SignalP-noTM
NechaP55049	0.109	36	0.106	36	0.139	4	0.103	0.104	N	0.45	SignalP-noTM
NechaP98098	0.108	38	0.121	13	0.175	1	0.122	0.122	N	0.45	SignalP-noTM
NechaP98099	0.115	18	0.109	37	0.125	28	0.103	0.106	N	0.45	SignalP-noTM
NechaP18985	0.175	26	0.155	26	0.212	2	0.143	0.149	N	0.45	SignalP-noTM
NechaP88365	0.109	63	0.124	11	0.154	1	0.133	0.129	N	0.45	SignalP-noTM
NechaP88366	0.108	18	0.107	36	0.131	26	0.102	0.104	N	0.45	SignalP-noTM
NechaP102243	0.144	26	0.117	26	0.149	1	0.098	0.107	N	0.45	SignalP-noTM
NechaP88368	0.155	26	0.147	26	0.2	1	0.147	0.147	N	0.45	SignalP-noTM
NechaP88369	0.13	25	0.145	11	0.257	1	0.159	0.152	N	0.45	SignalP-noTM
NechaP88370	0.111	53	0.107	53	0.115	47	0.099	0.103	N	0.45	SignalP-noTM
NechaP88372	0.154	52	0.127	52	0.159	11	0.109	0.117	N	0.45	SignalP-noTM
NechaP88373	0.114	50	0.108	18	0.119	3	0.107	0.108	N	0.45	SignalP-noTM
NechaP88376	0.113	23	0.107	23	0.119	21	0.101	0.104	N	0.45	SignalP-noTM
NechaP88377	0.154	33	0.121	33	0.159	8	0.101	0.11	N	0.45	SignalP-noTM
NechaP88378	0.107	42	0.107	55	0.117	52	0.101	0.104	N	0.45	SignalP-noTM
NechaP55084	0.122	36	0.235	12	0.619	2	0.457	0.355	N	0.45	SignalP-noTM
NechaP88380	0.11	67	0.108	67	0.116	56	0.098	0.103	N	0.45	SignalP-noTM
NechaP55092	0.118	49	0.112	49	0.13	47	0.101	0.106	N	0.45	SignalP-noTM
NechaP88386	0.11	66	0.109	11	0.123	1	0.1	0.104	N	0.45	SignalP-noTM
NechaP88388	0.107	67	0.104	67	0.114	10	0.097	0.1	N	0.45	SignalP-noTM
NechaP88389	0.143	28	0.122	13	0.191	2	0.118	0.12	N	0.45	SignalP-noTM
NechaP88390	0.11	65	0.108	27	0.144	8	0.106	0.107	N	0.45	SignalP-noTM
NechaP98103	0.217	28	0.213	28	0.383	7	0.205	0.209	N	0.45	SignalP-noTM
NechaP55064	0.109	60	0.106	47	0.124	29	0.1	0.103	N	0.45	SignalP-noTM
NechaP55090	0.17	18	0.221	18	0.398	21	0.287	0.247	N	0.5	SignalP-TM
NechaP55059	0.109	58	0.105	70	0.107	65	0.094	0.099	N	0.45	SignalP-noTM
NechaP55045	0.173	46	0.16	21	0.309	13	0.226	0.196	N	0.45	SignalP-noTM
NechaP55065	0.281	22	0.171	22	0.241	43	0.095	0.141	N	0.5	SignalP-TM
NechaP64914	0.147	22	0.198	22	0.351	17	0.265	0.234	N	0.45	SignalP-noTM
NechaP88398	0.107	62	0.105	62	0.114	49	0.098	0.102	N	0.45	SignalP-noTM
NechaP73198	0.11	11	0.111	18	0.149	13	0.114	0.113	N	0.45	SignalP-noTM
NechaP102246	0.441	18	0.636	18	0.955	2	0.91	0.784	Y	0.45	SignalP-noTM
NechaP88401	0.119	21	0.118	45	0.204	39	0.118	0.118	N	0.45	SignalP-noTM
NechaP9735	0.134	45	0.123	45	0.133	36	0.114	0.118	N	0.45	SignalP-noTM
NechaP55098	0.116	22	0.108	49	0.158	37	0.075	0.095	N	0.5	SignalP-TM
NechaP55099	0.111	70	0.108	35	0.137	19	0.105	0.106	N	0.45	SignalP-noTM
NechaP88404	0.111	27	0.104	41	0.113	23	0.097	0.1	N	0.45	SignalP-noTM
NechaP88405	0.173	57	0.131	57	0.162	14	0.107	0.118	N	0.45	SignalP-noTM
NechaP88406	0.113	27	0.109	27	0.12	3	0.105	0.107	N	0.45	SignalP-noTM
NechaP88407	0.128	18	0.139	18	0.176	14	0.144	0.141	N	0.45	SignalP-noTM
NechaP88408	0.162	20	0.197	20	0.308	18	0.235	0.218	N	0.45	SignalP-noTM
NechaP88409	0.3	20	0.425	20	0.814	19	0.605	0.523	Y	0.45	SignalP-noTM
NechaP18507	0.111	46	0.106	16	0.128	11	0.106	0.106	N	0.45	SignalP-noTM
NechaP88411	0.142	33	0.14	15	0.248	5	0.164	0.153	N	0.45	SignalP-noTM
NechaP88412	0.131	58	0.145	11	0.256	1	0.145	0.145	N	0.45	SignalP-noTM
NechaP55115	0.125	16	0.116	16	0.128	15	0.105	0.11	N	0.45	SignalP-noTM
NechaP55103	0.111	33	0.103	12	0.113	5	0.1	0.101	N	0.45	SignalP-noTM
NechaP88415	0.348	23	0.37	23	0.703	2	0.394	0.383	N	0.45	SignalP-noTM
NechaP593	0.111	43	0.113	61	0.164	52	0.11	0.112	N	0.45	SignalP-noTM
NechaP55114	0.113	26	0.128	26	0.282	23	0.146	0.138	N	0.45	SignalP-noTM
NechaP102248	0.109	62	0.106	43	0.116	27	0.1	0.103	N	0.45	SignalP-noTM
NechaP19726	0.116	34	0.108	34	0.127	25	0.096	0.102	N	0.45	SignalP-noTM
NechaP73201	0.125	69	0.111	69	0.138	3	0.103	0.107	N	0.45	SignalP-noTM
NechaP98109	0.109	63	0.108	55	0.124	40	0.102	0.105	N	0.45	SignalP-noTM
NechaP88422	0.159	28	0.172	28	0.299	15	0.196	0.185	N	0.45	SignalP-noTM
NechaP88423	0.114	43	0.131	43	0.179	30	0.125	0.129	N	0.5	SignalP-TM
NechaP88424	0.228	24	0.167	24	0.158	1	0.123	0.143	N	0.45	SignalP-noTM
NechaP88425	0.111	24	0.111	11	0.136	1	0.111	0.111	N	0.45	SignalP-noTM
NechaP102250	0.124	39	0.12	39	0.212	32	0.117	0.119	N	0.45	SignalP-noTM
NechaP88427	0.109	34	0.104	47	0.114	30	0.094	0.099	N	0.45	SignalP-noTM
NechaP88428	0.118	31	0.106	31	0.124	29	0.094	0.1	N	0.45	SignalP-noTM
NechaP88429	0.11	64	0.116	12	0.147	1	0.119	0.118	N	0.45	SignalP-noTM
NechaP25866	0.148	23	0.124	23	0.149	2	0.104	0.113	N	0.45	SignalP-noTM
NechaP55110	0.117	28	0.181	12	0.394	1	0.229	0.207	N	0.45	SignalP-noTM
NechaP98111	0.125	34	0.111	34	0.111	16	0.095	0.102	N	0.45	SignalP-noTM
NechaP106579	0.111	66	0.105	11	0.112	7	0.103	0.104	N	0.45	SignalP-noTM
NechaP55105	0.11	55	0.108	55	0.122	42	0.1	0.104	N	0.45	SignalP-noTM
NechaP98112	0.125	46	0.123	46	0.165	40	0.108	0.115	N	0.45	SignalP-noTM
NechaP98113	0.115	49	0.11	11	0.127	2	0.113	0.111	N	0.45	SignalP-noTM
NechaP88435	0.367	55	0.268	55	0.306	50	0.139	0.198	N	0.45	SignalP-noTM
NechaP88436	0.111	66	0.106	66	0.111	52	0.098	0.102	N	0.45	SignalP-noTM
NechaP88437	0.133	20	0.142	20	0.191	13	0.148	0.145	N	0.45	SignalP-noTM
NechaP102251	0.109	38	0.132	11	0.194	1	0.13	0.131	N	0.45	SignalP-noTM
NechaP102252	0.166	22	0.192	22	0.326	1	0.216	0.205	N	0.45	SignalP-noTM
NechaP88440	0.117	28	0.118	11	0.147	1	0.126	0.122	N	0.45	SignalP-noTM
NechaP88441	0.166	20	0.206	20	0.367	19	0.246	0.227	N	0.45	SignalP-noTM
NechaP88442	0.128	18	0.167	18	0.321	1	0.23	0.192	N	0.5	SignalP-TM
NechaP55194	0.802	25	0.764	25	0.88	1	0.738	0.75	Y	0.45	SignalP-noTM
NechaP55184	0.184	46	0.159	46	0.189	45	0.129	0.143	N	0.45	SignalP-noTM
NechaP55159	0.121	37	0.107	37	0.105	47	0.093	0.1	N	0.45	SignalP-noTM
NechaP98115	0.119	43	0.111	43	0.116	25	0.1	0.105	N	0.45	SignalP-noTM
NechaP88445	0.11	63	0.151	11	0.331	10	0.209	0.182	N	0.45	SignalP-noTM
NechaP64925	0.115	35	0.123	36	0.262	29	0.127	0.125	N	0.45	SignalP-noTM
NechaP88447	0.133	33	0.112	33	0.113	52	0.097	0.104	N	0.45	SignalP-noTM
NechaP88448	0.132	32	0.215	24	0.56	4	0.382	0.305	N	0.45	SignalP-noTM
NechaP88449	0.109	25	0.109	12	0.136	2	0.115	0.112	N	0.45	SignalP-noTM
NechaP88450	0.362	36	0.231	36	0.36	34	0.141	0.183	N	0.45	SignalP-noTM
NechaP88451	0.188	33	0.171	33	0.27	6	0.176	0.174	N	0.45	SignalP-noTM
NechaP88452	0.582	30	0.29	30	0.334	4	0.165	0.223	N	0.45	SignalP-noTM
NechaP88453	0.18	43	0.144	43	0.19	41	0.109	0.125	N	0.45	SignalP-noTM
NechaP88454	0.133	17	0.152	11	0.335	2	0.185	0.165	N	0.5	SignalP-TM
NechaP88455	0.17	26	0.136	26	0.234	43	0.11	0.122	N	0.45	SignalP-noTM
NechaP88456	0.213	39	0.142	39	0.189	11	0.104	0.122	N	0.45	SignalP-noTM
NechaP88457	0.107	64	0.103	69	0.116	57	0.096	0.099	N	0.45	SignalP-noTM
NechaP88458	0.127	57	0.142	11	0.228	2	0.161	0.152	N	0.45	SignalP-noTM
NechaP88459	0.109	31	0.106	70	0.11	60	0.097	0.101	N	0.45	SignalP-noTM
NechaP88461	0.12	36	0.114	36	0.13	1	0.11	0.112	N	0.45	SignalP-noTM
NechaP88462	0.11	42	0.108	11	0.122	41	0.107	0.107	N	0.45	SignalP-noTM
NechaP55142	0.108	37	0.102	12	0.124	35	0.099	0.101	N	0.45	SignalP-noTM
NechaP88463	0.11	70	0.114	11	0.139	2	0.115	0.114	N	0.45	SignalP-noTM
NechaP88464	0.14	22	0.16	22	0.259	15	0.181	0.171	N	0.45	SignalP-noTM
NechaP88466	0.14	35	0.116	35	0.109	16	0.095	0.105	N	0.45	SignalP-noTM
NechaP88467	0.109	36	0.114	11	0.131	1	0.118	0.117	N	0.45	SignalP-noTM
NechaP88468	0.179	39	0.148	21	0.179	10	0.124	0.135	N	0.45	SignalP-noTM
NechaP88469	0.118	17	0.158	12	0.309	3	0.198	0.18	N	0.45	SignalP-noTM
NechaP9396	0.11	17	0.125	11	0.174	2	0.13	0.128	N	0.45	SignalP-noTM
NechaP88471	0.142	33	0.132	33	0.205	13	0.124	0.127	N	0.45	SignalP-noTM
NechaP88472	0.114	21	0.134	11	0.222	1	0.136	0.135	N	0.45	SignalP-noTM
NechaP9124	0.109	45	0.125	11	0.176	3	0.142	0.134	N	0.45	SignalP-noTM
NechaP88473	0.111	39	0.151	24	0.345	13	0.21	0.183	N	0.45	SignalP-noTM
NechaP88474	0.111	28	0.106	43	0.117	39	0.097	0.101	N	0.45	SignalP-noTM
NechaP25351	0.184	27	0.177	11	0.444	1	0.256	0.209	N	0.5	SignalP-TM
NechaP55169	0.461	30	0.19	30	0.412	4	0.148	0.173	N	0.5	SignalP-TM
NechaP88477	0.108	15	0.109	15	0.123	1	0.103	0.106	N	0.45	SignalP-noTM
NechaP88478	0.122	35	0.115	35	0.148	15	0.113	0.114	N	0.45	SignalP-noTM
NechaP88479	0.11	40	0.12	13	0.21	2	0.123	0.121	N	0.45	SignalP-noTM
NechaP88480	0.339	22	0.384	22	0.57	7	0.468	0.417	N	0.5	SignalP-TM
NechaP88481	0.124	31	0.106	31	0.118	44	0.09	0.097	N	0.45	SignalP-noTM
NechaP88482	0.111	19	0.111	19	0.124	12	0.109	0.11	N	0.45	SignalP-noTM
NechaP88483	0.109	53	0.105	61	0.117	55	0.097	0.101	N	0.45	SignalP-noTM
NechaP88484	0.183	60	0.165	60	0.236	40	0.121	0.141	N	0.45	SignalP-noTM
NechaP88485	0.129	24	0.11	24	0.123	36	0.095	0.102	N	0.45	SignalP-noTM
NechaP6600	0.127	28	0.121	28	0.194	27	0.114	0.117	N	0.45	SignalP-noTM
NechaP88487	0.217	32	0.253	11	0.777	3	0.593	0.389	N	0.5	SignalP-TM
NechaP88488	0.111	46	0.116	12	0.136	6	0.127	0.122	N	0.45	SignalP-noTM
NechaP88489	0.656	23	0.334	23	0.28	20	0.17	0.246	N	0.45	SignalP-noTM
NechaP88490	0.112	57	0.108	19	0.147	11	0.107	0.108	N	0.45	SignalP-noTM
NechaP88491	0.116	68	0.109	68	0.123	1	0.099	0.103	N	0.45	SignalP-noTM
NechaP55166	0.153	29	0.159	29	0.271	25	0.155	0.158	N	0.5	SignalP-TM
NechaP88493	0.217	35	0.209	35	0.378	29	0.175	0.191	N	0.45	SignalP-noTM
NechaP55157	0.119	34	0.108	34	0.112	20	0.094	0.1	N	0.45	SignalP-noTM
NechaP88494	0.118	31	0.11	31	0.143	6	0.108	0.109	N	0.45	SignalP-noTM
NechaP88495	0.247	19	0.339	19	0.606	6	0.452	0.4	N	0.45	SignalP-noTM
NechaP88496	0.316	16	0.531	16	0.934	11	0.902	0.731	Y	0.45	SignalP-noTM
NechaP88497	0.13	30	0.199	12	0.46	5	0.367	0.29	N	0.45	SignalP-noTM
NechaP88498	0.137	20	0.119	20	0.136	19	0.104	0.111	N	0.45	SignalP-noTM
NechaP55178	0.565	23	0.712	23	0.953	14	0.896	0.811	Y	0.45	SignalP-noTM
NechaP9836	0.111	27	0.111	17	0.136	5	0.109	0.11	N	0.45	SignalP-noTM
NechaP102253	0.109	39	0.117	12	0.149	38	0.125	0.121	N	0.45	SignalP-noTM
NechaP55136	0.11	67	0.105	67	0.114	60	0.098	0.101	N	0.45	SignalP-noTM
NechaP88503	0.108	47	0.105	21	0.119	16	0.104	0.104	N	0.45	SignalP-noTM
NechaP88504	0.123	21	0.115	21	0.144	1	0.104	0.109	N	0.45	SignalP-noTM
NechaP98121	0.168	53	0.126	53	0.126	10	0.096	0.11	N	0.45	SignalP-noTM
NechaP88506	0.109	17	0.103	39	0.116	24	0.097	0.1	N	0.45	SignalP-noTM
NechaP88507	0.111	59	0.112	11	0.134	1	0.106	0.109	N	0.45	SignalP-noTM
NechaP88508	0.208	46	0.142	46	0.119	2	0.097	0.118	N	0.45	SignalP-noTM
NechaP88509	0.411	39	0.331	39	0.523	10	0.284	0.306	N	0.45	SignalP-noTM
NechaP88510	0.115	58	0.116	11	0.142	1	0.114	0.115	N	0.45	SignalP-noTM
NechaP88511	0.11	30	0.11	40	0.12	23	0.101	0.105	N	0.45	SignalP-noTM
NechaP88512	0.116	20	0.152	20	0.282	4	0.196	0.176	N	0.45	SignalP-noTM
NechaP88513	0.108	34	0.104	37	0.114	23	0.096	0.1	N	0.45	SignalP-noTM
NechaP55186	0.111	44	0.108	12	0.144	13	0.099	0.103	N	0.45	SignalP-noTM
NechaP88515	0.131	28	0.161	18	0.336	48	0.216	0.183	N	0.5	SignalP-TM
NechaP98124	0.112	65	0.105	48	0.121	47	0.097	0.101	N	0.45	SignalP-noTM
NechaP88517	0.156	22	0.272	22	0.679	4	0.471	0.38	N	0.45	SignalP-noTM
NechaP88518	0.108	51	0.127	11	0.198	1	0.131	0.129	N	0.45	SignalP-noTM
NechaP98125	0.111	45	0.115	13	0.139	1	0.112	0.113	N	0.45	SignalP-noTM
NechaP88520	0.109	58	0.106	52	0.118	30	0.098	0.102	N	0.45	SignalP-noTM
NechaP88521	0.108	28	0.111	19	0.149	12	0.119	0.115	N	0.45	SignalP-noTM
NechaP88522	0.111	25	0.119	12	0.157	2	0.125	0.122	N	0.45	SignalP-noTM
NechaP55158	0.846	21	0.892	21	0.971	12	0.939	0.917	Y	0.45	SignalP-noTM
NechaP88525	0.109	25	0.109	25	0.126	11	0.11	0.109	N	0.45	SignalP-noTM
NechaP88526	0.155	35	0.208	18	0.562	6	0.39	0.306	N	0.45	SignalP-noTM
NechaP102254	0.108	19	0.107	47	0.118	35	0.099	0.102	N	0.45	SignalP-noTM
NechaP12141	0.111	30	0.112	30	0.145	12	0.111	0.111	N	0.45	SignalP-noTM
NechaP73211	0.111	17	0.106	63	0.116	50	0.098	0.102	N	0.45	SignalP-noTM
NechaP102256	0.124	25	0.124	12	0.16	1	0.14	0.132	N	0.45	SignalP-noTM
NechaP55197	0.122	53	0.11	11	0.143	4	0.106	0.108	N	0.45	SignalP-noTM
NechaP88533	0.114	28	0.108	56	0.141	53	0.094	0.102	N	0.5	SignalP-TM
NechaP88534	0.11	42	0.114	12	0.155	4	0.127	0.121	N	0.45	SignalP-noTM
NechaP88535	0.164	42	0.127	42	0.125	5	0.1	0.112	N	0.45	SignalP-noTM
NechaP88536	0.11	44	0.107	14	0.117	7	0.108	0.108	N	0.45	SignalP-noTM
NechaP88537	0.182	22	0.17	22	0.252	13	0.158	0.164	N	0.45	SignalP-noTM
NechaP88538	0.176	17	0.158	17	0.18	4	0.127	0.141	N	0.45	SignalP-noTM
NechaP88539	0.132	42	0.117	42	0.144	46	0.108	0.112	N	0.45	SignalP-noTM
NechaP88540	0.238	24	0.22	24	0.282	3	0.213	0.217	N	0.5	SignalP-TM
NechaP88541	0.146	28	0.126	28	0.117	27	0.105	0.115	N	0.45	SignalP-noTM
NechaP55320	0.11	42	0.117	46	0.138	24	0.108	0.112	N	0.45	SignalP-noTM
NechaP16652	0.266	22	0.283	22	0.426	8	0.299	0.292	N	0.45	SignalP-noTM
NechaP18681	0.12	19	0.107	19	0.119	38	0.096	0.101	N	0.45	SignalP-noTM
NechaP88548	0.109	62	0.11	18	0.132	10	0.112	0.111	N	0.45	SignalP-noTM
NechaP88549	0.133	39	0.12	39	0.153	34	0.105	0.112	N	0.45	SignalP-noTM
NechaP12678	0.11	67	0.11	16	0.154	35	0.112	0.111	N	0.45	SignalP-noTM
NechaP88551	0.262	29	0.185	29	0.188	26	0.13	0.155	N	0.45	SignalP-noTM
NechaP55300	0.152	24	0.18	24	0.273	3	0.212	0.198	N	0.45	SignalP-noTM
NechaP98134	0.171	37	0.133	37	0.154	1	0.107	0.119	N	0.45	SignalP-noTM
NechaP9940	0.242	29	0.193	11	0.413	1	0.281	0.241	N	0.45	SignalP-noTM
NechaP88555	0.108	66	0.104	34	0.114	49	0.099	0.101	N	0.45	SignalP-noTM
NechaP88556	0.114	27	0.115	27	0.144	24	0.115	0.115	N	0.45	SignalP-noTM
NechaP98136	0.126	41	0.117	41	0.127	23	0.107	0.111	N	0.45	SignalP-noTM
NechaP55359	0.239	30	0.109	30	0.13	69	0.07	0.093	N	0.5	SignalP-TM
NechaP88559	0.108	42	0.159	27	0.291	1	0.214	0.181	N	0.5	SignalP-TM
NechaP102257	0.197	28	0.387	28	0.948	16	0.777	0.598	Y	0.45	SignalP-noTM
NechaP55315	0.198	28	0.181	28	0.221	2	0.17	0.175	N	0.45	SignalP-noTM
NechaP88562	0.153	22	0.122	22	0.133	1	0.095	0.107	N	0.45	SignalP-noTM
NechaP88563	0.128	41	0.111	41	0.108	41	0.091	0.1	N	0.45	SignalP-noTM
NechaP88564	0.11	52	0.121	11	0.166	1	0.118	0.119	N	0.45	SignalP-noTM
NechaP88565	0.108	66	0.106	39	0.125	20	0.099	0.103	N	0.45	SignalP-noTM
NechaP88566	0.122	18	0.122	18	0.179	14	0.121	0.121	N	0.45	SignalP-noTM
NechaP55227	0.114	26	0.121	11	0.17	1	0.117	0.119	N	0.45	SignalP-noTM
NechaP88568	0.121	25	0.11	49	0.138	32	0.102	0.106	N	0.45	SignalP-noTM
NechaP88569	0.111	46	0.114	12	0.137	1	0.108	0.11	N	0.45	SignalP-noTM
NechaP88571	0.11	50	0.113	11	0.134	1	0.098	0.105	N	0.45	SignalP-noTM
NechaP55280	0.155	57	0.122	57	0.12	22	0.097	0.109	N	0.45	SignalP-noTM
NechaP98139	0.135	22	0.138	22	0.221	14	0.139	0.139	N	0.45	SignalP-noTM
NechaP88573	0.138	43	0.116	43	0.122	13	0.102	0.108	N	0.45	SignalP-noTM
NechaP15563	0.135	19	0.116	19	0.123	36	0.099	0.107	N	0.45	SignalP-noTM
NechaP55230	0.115	20	0.108	67	0.144	30	0.097	0.102	N	0.45	SignalP-noTM
NechaP105749	0.107	68	0.122	12	0.176	25	0.13	0.126	N	0.45	SignalP-noTM
NechaP55235	0.11	41	0.106	41	0.121	2	0.095	0.1	N	0.45	SignalP-noTM
NechaP55285	0.114	20	0.108	20	0.131	19	0.103	0.105	N	0.45	SignalP-noTM
NechaP55362	0.112	23	0.134	61	0.222	56	0.116	0.127	N	0.5	SignalP-TM
NechaP98146	0.114	19	0.107	19	0.115	30	0.099	0.103	N	0.45	SignalP-noTM
NechaP88583	0.15	18	0.111	18	0.137	43	0.082	0.095	N	0.45	SignalP-noTM
NechaP88584	0.191	27	0.171	27	0.318	3	0.173	0.172	N	0.45	SignalP-noTM
NechaP55340	0.148	19	0.119	19	0.117	3	0.096	0.107	N	0.45	SignalP-noTM
NechaP55265	0.117	35	0.131	12	0.2	4	0.164	0.149	N	0.45	SignalP-noTM
NechaP55236	0.115	32	0.12	12	0.155	1	0.128	0.124	N	0.45	SignalP-noTM
NechaP55379	0.141	30	0.119	30	0.122	1	0.102	0.11	N	0.45	SignalP-noTM
NechaP55318	0.11	35	0.106	64	0.107	55	0.097	0.101	N	0.45	SignalP-noTM
NechaP88588	0.111	15	0.104	68	0.108	30	0.097	0.101	N	0.45	SignalP-noTM
NechaP55330	0.114	40	0.11	21	0.16	12	0.11	0.11	N	0.45	SignalP-noTM
NechaP55328	0.123	26	0.105	26	0.113	57	0.09	0.097	N	0.45	SignalP-noTM
NechaP55397	0.112	28	0.108	28	0.117	56	0.101	0.104	N	0.45	SignalP-noTM
NechaP55392	0.127	31	0.111	31	0.124	1	0.101	0.106	N	0.45	SignalP-noTM
NechaP88592	0.154	20	0.192	20	0.344	19	0.23	0.213	N	0.45	SignalP-noTM
NechaP98155	0.417	19	0.545	19	0.815	16	0.692	0.624	Y	0.45	SignalP-noTM
NechaP88594	0.112	53	0.106	62	0.108	57	0.096	0.101	N	0.45	SignalP-noTM
NechaP55313	0.129	52	0.143	11	0.235	6	0.189	0.168	N	0.45	SignalP-noTM
NechaP55279	0.401	23	0.198	23	0.167	22	0.098	0.144	N	0.45	SignalP-noTM
NechaP98156	0.133	38	0.134	26	0.207	14	0.165	0.146	N	0.5	SignalP-TM
NechaP98157	0.134	53	0.148	11	0.246	3	0.177	0.164	N	0.45	SignalP-noTM
NechaP55268	0.123	22	0.123	12	0.158	1	0.125	0.124	N	0.45	SignalP-noTM
NechaP88599	0.114	16	0.11	38	0.136	15	0.105	0.108	N	0.45	SignalP-noTM
NechaP55344	0.115	26	0.113	11	0.143	1	0.107	0.109	N	0.45	SignalP-noTM
NechaP88601	0.113	43	0.105	43	0.115	47	0.096	0.1	N	0.45	SignalP-noTM
NechaP88603	0.231	21	0.167	21	0.137	12	0.119	0.141	N	0.45	SignalP-noTM
NechaP98159	0.154	22	0.153	22	0.225	1	0.149	0.151	N	0.45	SignalP-noTM
NechaP13000	0.187	48	0.139	48	0.165	47	0.103	0.12	N	0.45	SignalP-noTM
NechaP88606	0.109	58	0.108	37	0.119	29	0.104	0.106	N	0.45	SignalP-noTM
NechaP88607	0.109	53	0.104	39	0.112	20	0.096	0.1	N	0.45	SignalP-noTM
NechaP55211	0.112	31	0.11	31	0.124	23	0.106	0.108	N	0.45	SignalP-noTM
NechaP88609	0.117	46	0.108	69	0.114	52	0.096	0.102	N	0.45	SignalP-noTM
NechaP88613	0.108	22	0.105	59	0.12	3	0.099	0.101	N	0.45	SignalP-noTM
NechaP88614	0.109	21	0.109	13	0.121	1	0.103	0.106	N	0.45	SignalP-noTM
NechaP88616	0.287	20	0.498	20	0.914	14	0.871	0.699	Y	0.45	SignalP-noTM
NechaP98161	0.146	26	0.144	26	0.227	34	0.147	0.145	N	0.5	SignalP-TM
NechaP73218	0.136	21	0.115	21	0.124	1	0.095	0.104	N	0.45	SignalP-noTM
NechaP98163	0.152	42	0.146	42	0.293	41	0.124	0.134	N	0.45	SignalP-noTM
NechaP98164	0.112	41	0.122	12	0.158	1	0.125	0.123	N	0.45	SignalP-noTM
NechaP9925	0.321	30	0.216	30	0.333	3	0.172	0.193	N	0.45	SignalP-noTM
NechaP73960	0.754	18	0.704	18	0.75	2	0.665	0.688	Y	0.5	SignalP-TM
NechaP64937	0.16	21	0.165	16	0.259	4	0.203	0.18	N	0.5	SignalP-TM
NechaP73961	0.269	53	0.18	53	0.17	47	0.114	0.145	N	0.45	SignalP-noTM
NechaP73962	0.109	39	0.113	25	0.172	13	0.119	0.116	N	0.45	SignalP-noTM
NechaP88628	0.11	19	0.11	12	0.127	1	0.102	0.106	N	0.45	SignalP-noTM
NechaP73963	0.111	37	0.11	37	0.175	35	0.106	0.108	N	0.45	SignalP-noTM
NechaP55247	0.245	38	0.22	38	0.27	37	0.154	0.194	N	0.5	SignalP-TM
NechaP19176	0.11	27	0.164	12	0.318	1	0.175	0.17	N	0.45	SignalP-noTM
NechaP88631	0.108	68	0.108	31	0.126	22	0.102	0.105	N	0.45	SignalP-noTM
NechaP88634	0.165	30	0.132	30	0.198	3	0.118	0.124	N	0.45	SignalP-noTM
NechaP88640	0.122	25	0.112	25	0.118	5	0.103	0.107	N	0.45	SignalP-noTM
NechaP88641	0.16	20	0.144	20	0.156	18	0.128	0.136	N	0.45	SignalP-noTM
NechaP55214	0.109	54	0.108	54	0.141	13	0.107	0.107	N	0.45	SignalP-noTM
NechaP55271	0.106	27	0.109	55	0.121	43	0.101	0.106	N	0.5	SignalP-TM
NechaP88644	0.169	14	0.162	14	0.205	7	0.161	0.162	N	0.45	SignalP-noTM
NechaP73228	0.118	21	0.14	11	0.21	3	0.169	0.155	N	0.45	SignalP-noTM
NechaP73231	0.132	19	0.129	19	0.146	22	0.122	0.125	N	0.45	SignalP-noTM
NechaP73232	0.685	21	0.699	21	0.887	1	0.697	0.698	Y	0.45	SignalP-noTM
NechaP19766	0.107	8	0.122	11	0.162	1	0.13	0.126	N	0.45	SignalP-noTM
NechaP55208	0.276	20	0.222	20	0.229	4	0.175	0.196	N	0.45	SignalP-noTM
NechaP88651	0.133	30	0.123	30	0.149	1	0.116	0.119	N	0.45	SignalP-noTM
NechaP88655	0.113	27	0.106	11	0.116	1	0.105	0.106	N	0.45	SignalP-noTM
NechaP88656	0.111	21	0.114	27	0.163	27	0.117	0.116	N	0.45	SignalP-noTM
NechaP88657	0.111	45	0.109	45	0.125	31	0.099	0.104	N	0.45	SignalP-noTM
NechaP88658	0.11	36	0.114	58	0.154	50	0.107	0.11	N	0.45	SignalP-noTM
NechaP88659	0.446	21	0.547	21	0.78	9	0.667	0.611	Y	0.45	SignalP-noTM
NechaP88660	0.11	52	0.112	11	0.126	1	0.108	0.11	N	0.45	SignalP-noTM
NechaP88661	0.109	32	0.108	11	0.128	3	0.111	0.109	N	0.45	SignalP-noTM
NechaP88662	0.11	33	0.107	51	0.131	32	0.099	0.103	N	0.45	SignalP-noTM
NechaP54400	0.19	37	0.168	37	0.243	6	0.162	0.165	N	0.45	SignalP-noTM
NechaP87922	0.224	18	0.173	18	0.177	13	0.134	0.152	N	0.45	SignalP-noTM
NechaP87923	0.125	23	0.127	23	0.178	14	0.13	0.128	N	0.45	SignalP-noTM
NechaP87924	0.351	22	0.554	22	0.954	5	0.872	0.726	Y	0.45	SignalP-noTM
NechaP97887	0.223	32	0.175	32	0.206	31	0.142	0.157	N	0.45	SignalP-noTM
NechaP9447	0.188	19	0.141	19	0.133	1	0.1	0.119	N	0.45	SignalP-noTM
NechaP87927	0.513	22	0.686	22	0.959	12	0.918	0.811	Y	0.45	SignalP-noTM
NechaP87928	0.199	25	0.176	25	0.256	5	0.163	0.169	N	0.45	SignalP-noTM
NechaP54363	0.159	20	0.207	20	0.417	1	0.245	0.227	N	0.45	SignalP-noTM
NechaP97888	0.111	25	0.11	14	0.126	33	0.109	0.11	N	0.45	SignalP-noTM
NechaP54383	0.118	55	0.123	55	0.189	37	0.123	0.123	N	0.45	SignalP-noTM
NechaP54387	0.258	41	0.194	41	0.309	19	0.173	0.186	N	0.5	SignalP-TM
NechaP87934	0.136	27	0.135	11	0.228	1	0.166	0.148	N	0.5	SignalP-TM
NechaP87935	0.177	21	0.237	21	0.589	19	0.314	0.279	N	0.45	SignalP-noTM
NechaP54364	0.188	20	0.202	20	0.265	13	0.217	0.208	N	0.5	SignalP-TM
NechaP54398	0.121	22	0.12	22	0.169	21	0.118	0.119	N	0.45	SignalP-noTM
NechaP87938	0.122	67	0.109	67	0.122	1	0.097	0.102	N	0.45	SignalP-noTM
NechaP54419	0.538	26	0.629	26	0.893	6	0.748	0.694	Y	0.45	SignalP-noTM
NechaP87940	0.128	27	0.112	27	0.124	49	0.1	0.105	N	0.45	SignalP-noTM
NechaP97892	0.111	31	0.106	31	0.115	30	0.1	0.103	N	0.45	SignalP-noTM
NechaP87942	0.152	26	0.132	48	0.199	37	0.13	0.131	N	0.5	SignalP-TM
NechaP54350	0.166	27	0.134	27	0.163	26	0.11	0.121	N	0.45	SignalP-noTM
NechaP87944	0.23	39	0.162	39	0.257	11	0.131	0.145	N	0.45	SignalP-noTM
NechaP87945	0.185	37	0.22	37	0.563	36	0.227	0.224	N	0.45	SignalP-noTM
NechaP87946	0.152	27	0.136	27	0.185	3	0.129	0.132	N	0.45	SignalP-noTM
NechaP87947	0.133	38	0.12	38	0.161	10	0.115	0.118	N	0.45	SignalP-noTM
NechaP54353	0.12	70	0.132	70	0.204	65	0.097	0.118	N	0.5	SignalP-TM
NechaP54349	0.157	68	0.125	68	0.132	56	0.1	0.115	N	0.5	SignalP-TM
NechaP87950	0.162	21	0.141	21	0.175	1	0.119	0.129	N	0.45	SignalP-noTM
NechaP54423	0.166	32	0.151	32	0.272	4	0.166	0.157	N	0.5	SignalP-TM
NechaP87952	0.118	64	0.109	64	0.126	12	0.1	0.104	N	0.45	SignalP-noTM
NechaP87953	0.218	36	0.16	36	0.16	31	0.12	0.138	N	0.45	SignalP-noTM
NechaP106555	0.906	20	0.929	20	0.976	4	0.954	0.943	Y	0.45	SignalP-noTM
NechaP97897	0.121	20	0.27	15	0.695	1	0.6	0.448	N	0.45	SignalP-noTM
NechaP87956	0.117	52	0.109	52	0.116	2	0.101	0.105	N	0.45	SignalP-noTM
NechaP87957	0.11	21	0.113	21	0.164	10	0.117	0.115	N	0.45	SignalP-noTM
NechaP87958	0.11	53	0.124	11	0.182	5	0.145	0.135	N	0.45	SignalP-noTM
NechaP87959	0.263	28	0.461	28	0.974	4	0.833	0.662	Y	0.45	SignalP-noTM
NechaP87960	0.297	20	0.379	20	0.637	1	0.502	0.428	N	0.5	SignalP-TM
NechaP87961	0.144	22	0.171	48	0.361	40	0.17	0.171	N	0.45	SignalP-noTM
NechaP97898	0.643	16	0.771	16	0.948	10	0.922	0.852	Y	0.45	SignalP-noTM
NechaP87963	0.121	48	0.109	48	0.118	25	0.098	0.103	N	0.45	SignalP-noTM
NechaP87964	0.146	21	0.176	21	0.347	15	0.213	0.196	N	0.45	SignalP-noTM
NechaP87965	0.761	17	0.835	17	0.954	10	0.914	0.877	Y	0.45	SignalP-noTM
NechaP54333	0.302	20	0.528	20	0.976	12	0.923	0.742	Y	0.45	SignalP-noTM
NechaP54408	0.432	20	0.397	20	0.465	2	0.375	0.388	N	0.5	SignalP-TM
NechaP54418	0.126	35	0.118	35	0.16	5	0.112	0.115	N	0.45	SignalP-noTM
NechaP97899	0.153	43	0.157	43	0.384	41	0.133	0.144	N	0.45	SignalP-noTM
NechaP54370	0.182	61	0.194	11	0.531	4	0.332	0.268	N	0.45	SignalP-noTM
NechaP97901	0.344	19	0.265	19	0.353	2	0.176	0.217	N	0.45	SignalP-noTM
NechaP106557	0.44	26	0.554	19	0.894	16	0.825	0.7	Y	0.45	SignalP-noTM
NechaP87973	0.109	60	0.106	60	0.123	22	0.099	0.102	N	0.45	SignalP-noTM
NechaP97902	0.11	53	0.107	27	0.131	12	0.104	0.106	N	0.45	SignalP-noTM
NechaP87975	0.183	42	0.104	17	0.138	13	0.101	0.103	N	0.5	SignalP-TM
NechaP87976	0.11	29	0.106	35	0.121	31	0.104	0.105	N	0.45	SignalP-noTM
NechaP87977	0.11	35	0.108	11	0.117	1	0.103	0.105	N	0.45	SignalP-noTM
NechaP102183	0.145	36	0.12	36	0.132	1	0.104	0.111	N	0.45	SignalP-noTM
NechaP87979	0.872	26	0.896	26	0.978	16	0.912	0.905	Y	0.45	SignalP-noTM
NechaP64789	0.226	24	0.172	24	0.221	23	0.131	0.15	N	0.45	SignalP-noTM
NechaP87982	0.149	28	0.203	16	0.482	2	0.24	0.223	N	0.45	SignalP-noTM
NechaP18558	0.14	21	0.139	21	0.195	1	0.132	0.135	N	0.45	SignalP-noTM
NechaP87984	0.137	45	0.118	45	0.13	39	0.1	0.109	N	0.45	SignalP-noTM
NechaP87985	0.11	46	0.105	70	0.115	3	0.099	0.102	N	0.45	SignalP-noTM
NechaP87986	0.195	34	0.139	34	0.126	28	0.096	0.116	N	0.45	SignalP-noTM
NechaP87987	0.109	12	0.136	12	0.216	1	0.123	0.129	N	0.45	SignalP-noTM
NechaP87988	0.116	52	0.121	11	0.165	1	0.126	0.124	N	0.45	SignalP-noTM
NechaP97906	0.112	29	0.109	14	0.125	11	0.11	0.109	N	0.45	SignalP-noTM
NechaP97907	0.109	35	0.107	48	0.133	34	0.097	0.102	N	0.45	SignalP-noTM
NechaP54362	0.121	47	0.129	47	0.206	35	0.123	0.127	N	0.5	SignalP-TM
NechaP87992	0.12	28	0.151	11	0.249	2	0.19	0.172	N	0.45	SignalP-noTM
NechaP87993	0.362	22	0.449	22	0.847	16	0.547	0.502	Y	0.45	SignalP-noTM
NechaP764	0.119	51	0.135	51	0.481	45	0.121	0.128	N	0.45	SignalP-noTM
NechaP54342	0.161	20	0.331	17	0.806	12	0.692	0.476	N	0.5	SignalP-TM
NechaP87996	0.178	24	0.158	24	0.225	1	0.143	0.15	N	0.45	SignalP-noTM
NechaP87997	0.123	53	0.109	29	0.125	8	0.107	0.108	N	0.45	SignalP-noTM
NechaP19718	0.11	60	0.109	60	0.133	46	0.104	0.106	N	0.45	SignalP-noTM
NechaP54365	0.11	59	0.104	59	0.113	41	0.097	0.1	N	0.45	SignalP-noTM
NechaP54394	0.355	24	0.465	24	0.731	11	0.611	0.544	Y	0.45	SignalP-noTM
NechaP88001	0.151	22	0.202	22	0.313	12	0.266	0.227	N	0.5	SignalP-TM
NechaP54339	0.212	24	0.227	14	0.336	1	0.241	0.235	N	0.45	SignalP-noTM
NechaP64790	0.715	20	0.787	20	0.922	2	0.862	0.828	Y	0.45	SignalP-noTM
NechaP88004	0.124	35	0.109	35	0.126	3	0.099	0.104	N	0.45	SignalP-noTM
NechaP102186	0.111	22	0.13	22	0.272	16	0.152	0.142	N	0.45	SignalP-noTM
NechaP97913	0.201	30	0.152	30	0.181	1	0.117	0.133	N	0.45	SignalP-noTM
NechaP88008	0.135	59	0.115	59	0.146	23	0.103	0.109	N	0.45	SignalP-noTM
NechaP102187	0.629	20	0.702	20	0.846	1	0.773	0.74	Y	0.45	SignalP-noTM
NechaP54454	0.823	26	0.878	26	0.979	16	0.934	0.908	Y	0.45	SignalP-noTM
NechaP54440	0.603	21	0.654	21	0.79	10	0.701	0.679	Y	0.45	SignalP-noTM
NechaP9404	0.11	63	0.113	11	0.151	45	0.104	0.108	N	0.45	SignalP-noTM
NechaP54441	0.192	36	0.18	36	0.28	35	0.128	0.159	N	0.5	SignalP-TM
NechaP54457	0.114	23	0.159	23	0.345	3	0.222	0.193	N	0.45	SignalP-noTM
NechaP88015	0.108	69	0.104	41	0.107	31	0.096	0.1	N	0.45	SignalP-noTM
NechaP102188	0.126	48	0.11	48	0.107	58	0.093	0.101	N	0.45	SignalP-noTM
NechaP88017	0.11	39	0.114	12	0.139	1	0.115	0.115	N	0.45	SignalP-noTM
NechaP88018	0.827	21	0.74	21	0.764	17	0.654	0.693	Y	0.45	SignalP-noTM
NechaP102189	0.11	42	0.107	33	0.127	42	0.095	0.102	N	0.5	SignalP-TM
NechaP54453	0.125	22	0.113	22	0.155	30	0.103	0.107	N	0.45	SignalP-noTM
NechaP88021	0.115	30	0.107	30	0.117	13	0.1	0.103	N	0.45	SignalP-noTM
NechaP88022	0.308	19	0.409	19	0.703	7	0.536	0.477	Y	0.45	SignalP-noTM
NechaP88023	0.111	40	0.111	11	0.159	3	0.118	0.115	N	0.45	SignalP-noTM
NechaP15701	0.675	39	0.364	39	0.344	38	0.151	0.279	N	0.5	SignalP-TM
NechaP97919	0.818	21	0.854	21	0.95	12	0.893	0.875	Y	0.45	SignalP-noTM
NechaP54444	0.115	18	0.105	25	0.119	22	0.098	0.101	N	0.45	SignalP-noTM
NechaP88027	0.116	58	0.107	27	0.131	67	0.098	0.103	N	0.5	SignalP-TM
NechaP88028	0.389	23	0.487	23	0.84	2	0.611	0.554	Y	0.45	SignalP-noTM
NechaP88029	0.11	30	0.107	30	0.115	22	0.103	0.105	N	0.45	SignalP-noTM
NechaP88030	0.11	36	0.117	11	0.178	37	0.114	0.115	N	0.45	SignalP-noTM
NechaP54475	0.236	38	0.149	12	0.268	8	0.208	0.172	N	0.5	SignalP-TM
NechaP88032	0.187	24	0.16	24	0.156	19	0.137	0.148	N	0.45	SignalP-noTM
NechaP54469	0.122	28	0.116	14	0.146	2	0.119	0.118	N	0.45	SignalP-noTM
NechaP88034	0.11	35	0.104	67	0.108	51	0.098	0.101	N	0.45	SignalP-noTM
NechaP97923	0.252	29	0.211	36	0.481	2	0.219	0.214	N	0.5	SignalP-TM
NechaP54470	0.281	28	0.463	28	0.975	13	0.798	0.644	Y	0.45	SignalP-noTM
NechaP54486	0.711	19	0.766	19	0.862	1	0.817	0.794	Y	0.45	SignalP-noTM
NechaP88038	0.109	16	0.107	42	0.133	9	0.107	0.107	N	0.45	SignalP-noTM
NechaP54481	0.153	39	0.167	39	0.28	15	0.175	0.17	N	0.5	SignalP-TM
NechaP88039	0.288	25	0.219	25	0.297	4	0.197	0.21	N	0.5	SignalP-TM
NechaP88040	0.747	17	0.792	17	0.898	6	0.837	0.816	Y	0.45	SignalP-noTM
NechaP54479	0.143	20	0.122	20	0.167	66	0.111	0.117	N	0.5	SignalP-TM
NechaP54482	0.149	41	0.142	39	0.229	36	0.127	0.136	N	0.5	SignalP-TM
NechaP102190	0.133	38	0.116	11	0.144	1	0.117	0.116	N	0.45	SignalP-noTM
NechaP54493	0.107	35	0.108	12	0.116	1	0.107	0.107	N	0.45	SignalP-noTM
NechaP88045	0.123	50	0.119	14	0.149	13	0.127	0.123	N	0.45	SignalP-noTM
NechaP54540	0.11	56	0.103	56	0.115	22	0.096	0.099	N	0.45	SignalP-noTM
NechaP88047	0.155	26	0.136	26	0.197	6	0.126	0.131	N	0.45	SignalP-noTM
NechaP54512	0.109	18	0.12	64	0.169	59	0.106	0.115	N	0.5	SignalP-TM
NechaP73077	0.13	38	0.117	16	0.139	9	0.121	0.119	N	0.45	SignalP-noTM
NechaP54507	0.124	18	0.128	18	0.206	2	0.125	0.127	N	0.45	SignalP-noTM
NechaP54591	0.609	17	0.745	17	0.938	1	0.9	0.829	Y	0.45	SignalP-noTM
NechaP88053	0.343	33	0.315	33	0.616	32	0.259	0.285	N	0.45	SignalP-noTM
NechaP88054	0.799	22	0.85	22	0.966	5	0.903	0.879	Y	0.45	SignalP-noTM
NechaP97933	0.11	51	0.105	58	0.113	55	0.095	0.1	N	0.45	SignalP-noTM
NechaP54508	0.108	51	0.102	69	0.105	45	0.095	0.098	N	0.45	SignalP-noTM
NechaP73080	0.115	25	0.119	25	0.166	13	0.121	0.12	N	0.45	SignalP-noTM
NechaP54524	0.123	19	0.112	19	0.119	35	0.1	0.106	N	0.45	SignalP-noTM
NechaP97937	0.145	21	0.14	21	0.16	21	0.134	0.137	N	0.45	SignalP-noTM
NechaP54515	0.123	32	0.117	14	0.192	5	0.141	0.13	N	0.45	SignalP-noTM
NechaP73084	0.112	33	0.122	12	0.171	11	0.124	0.123	N	0.45	SignalP-noTM
NechaP105709	0.15	41	0.119	41	0.124	1	0.097	0.107	N	0.45	SignalP-noTM
NechaP97941	0.126	37	0.121	37	0.151	7	0.12	0.121	N	0.45	SignalP-noTM
NechaP88064	0.108	52	0.111	59	0.149	69	0.096	0.105	N	0.5	SignalP-TM
NechaP54538	0.121	42	0.147	42	0.358	36	0.152	0.15	N	0.45	SignalP-noTM
NechaP88066	0.235	37	0.27	19	0.608	1	0.461	0.373	N	0.45	SignalP-noTM
NechaP97942	0.129	60	0.118	51	0.162	48	0.096	0.109	N	0.5	SignalP-TM
NechaP88068	0.11	29	0.107	42	0.114	28	0.099	0.102	N	0.45	SignalP-noTM
NechaP88069	0.11	56	0.106	12	0.114	3	0.105	0.105	N	0.45	SignalP-noTM
NechaP19162	0.112	48	0.112	11	0.146	2	0.114	0.113	N	0.45	SignalP-noTM
NechaP102195	0.11	16	0.116	11	0.133	1	0.12	0.118	N	0.45	SignalP-noTM
NechaP54574	0.183	56	0.196	56	0.328	43	0.148	0.17	N	0.45	SignalP-noTM
NechaP97943	0.12	26	0.129	13	0.185	3	0.141	0.135	N	0.45	SignalP-noTM
NechaP54505	0.553	20	0.669	20	0.874	12	0.806	0.743	Y	0.45	SignalP-noTM
NechaP97945	0.112	47	0.104	68	0.111	55	0.097	0.1	N	0.45	SignalP-noTM
NechaP54522	0.137	45	0.146	45	0.21	42	0.127	0.139	N	0.5	SignalP-TM
NechaP88077	0.13	22	0.218	11	0.584	4	0.422	0.299	N	0.5	SignalP-TM
NechaP88078	0.149	32	0.171	32	0.459	29	0.187	0.18	N	0.45	SignalP-noTM
NechaP19025	0.172	29	0.289	16	0.701	12	0.633	0.475	Y	0.45	SignalP-noTM
NechaP54509	0.122	23	0.155	13	0.282	2	0.199	0.179	N	0.45	SignalP-noTM
NechaP54550	0.197	36	0.197	36	0.291	30	0.181	0.188	N	0.45	SignalP-noTM
NechaP122999	0.696	17	0.753	17	0.884	13	0.811	0.785	Y	0.45	SignalP-noTM
NechaP54511	0.151	48	0.141	30	0.263	47	0.145	0.143	N	0.45	SignalP-noTM
NechaP88084	0.131	30	0.136	11	0.262	4	0.183	0.161	N	0.45	SignalP-noTM
NechaP16360	0.288	27	0.236	27	0.292	7	0.2	0.217	N	0.45	SignalP-noTM
NechaP88086	0.574	23	0.708	23	0.945	14	0.874	0.798	Y	0.45	SignalP-noTM
NechaP88087	0.111	30	0.107	30	0.119	18	0.102	0.104	N	0.45	SignalP-noTM
NechaP54589	0.109	48	0.115	12	0.144	1	0.109	0.112	N	0.45	SignalP-noTM
NechaP88089	0.121	64	0.11	64	0.132	1	0.099	0.104	N	0.45	SignalP-noTM
NechaP88090	0.145	38	0.128	38	0.177	29	0.119	0.123	N	0.45	SignalP-noTM
NechaP54587	0.11	67	0.105	44	0.11	22	0.095	0.1	N	0.45	SignalP-noTM
NechaP73949	0.187	19	0.321	19	0.802	15	0.569	0.455	Y	0.45	SignalP-noTM
NechaP102196	0.461	20	0.648	20	0.958	3	0.911	0.79	Y	0.45	SignalP-noTM
NechaP88093	0.115	48	0.124	36	0.188	32	0.111	0.119	N	0.5	SignalP-TM
NechaP88094	0.115	30	0.128	11	0.336	47	0.136	0.133	N	0.45	SignalP-noTM
NechaP88095	0.111	35	0.114	11	0.147	1	0.105	0.109	N	0.45	SignalP-noTM
NechaP54513	0.12	46	0.112	46	0.119	42	0.1	0.105	N	0.45	SignalP-noTM
NechaP54518	0.148	32	0.145	32	0.271	31	0.145	0.145	N	0.45	SignalP-noTM
NechaP54501	0.184	24	0.22	11	0.624	3	0.454	0.314	N	0.5	SignalP-TM
NechaP88099	0.112	66	0.159	21	0.488	6	0.235	0.2	N	0.45	SignalP-noTM
NechaP88100	0.182	18	0.233	18	0.388	3	0.288	0.263	N	0.45	SignalP-noTM
NechaP88101	0.109	57	0.116	67	0.16	52	0.105	0.11	N	0.45	SignalP-noTM
NechaP54705	0.111	62	0.108	62	0.125	50	0.1	0.104	N	0.45	SignalP-noTM
NechaP88103	0.109	51	0.127	11	0.182	1	0.112	0.119	N	0.45	SignalP-noTM
NechaP102197	0.133	30	0.123	30	0.147	2	0.116	0.119	N	0.45	SignalP-noTM
NechaP88105	0.762	21	0.837	21	0.976	11	0.919	0.881	Y	0.45	SignalP-noTM
NechaP54849	0.11	66	0.106	66	0.112	31	0.097	0.101	N	0.45	SignalP-noTM
NechaP64813	0.122	64	0.125	21	0.162	19	0.131	0.128	N	0.45	SignalP-noTM
NechaP88108	0.299	32	0.191	32	0.145	42	0.122	0.154	N	0.45	SignalP-noTM
NechaP88109	0.262	18	0.303	18	0.54	1	0.294	0.298	N	0.45	SignalP-noTM
NechaP88110	0.639	22	0.74	22	0.946	12	0.858	0.804	Y	0.45	SignalP-noTM
NechaP54993	0.239	22	0.383	22	0.807	15	0.609	0.505	Y	0.45	SignalP-noTM
NechaP54666	0.139	25	0.181	25	0.348	1	0.232	0.202	N	0.5	SignalP-TM
NechaP102200	0.109	21	0.149	13	0.335	2	0.197	0.175	N	0.45	SignalP-noTM
NechaP88114	0.803	19	0.831	19	0.892	8	0.861	0.847	Y	0.45	SignalP-noTM
NechaP88115	0.11	62	0.109	62	0.135	12	0.107	0.108	N	0.45	SignalP-noTM
NechaP97964	0.123	32	0.136	11	0.221	1	0.134	0.135	N	0.45	SignalP-noTM
NechaP97965	0.176	17	0.16	17	0.184	3	0.138	0.148	N	0.45	SignalP-noTM
NechaP88118	0.11	16	0.113	22	0.138	12	0.118	0.116	N	0.45	SignalP-noTM
NechaP88119	0.173	23	0.161	23	0.245	3	0.15	0.155	N	0.45	SignalP-noTM
NechaP97966	0.11	49	0.131	12	0.196	1	0.118	0.124	N	0.45	SignalP-noTM
NechaP54968	0.158	19	0.149	19	0.187	3	0.135	0.141	N	0.45	SignalP-noTM
NechaP54889	0.127	20	0.106	20	0.116	25	0.089	0.097	N	0.45	SignalP-noTM
NechaP54624	0.108	16	0.113	11	0.137	3	0.125	0.12	N	0.45	SignalP-noTM
NechaP88124	0.118	23	0.206	13	0.484	2	0.338	0.277	N	0.45	SignalP-noTM
NechaP88125	0.417	22	0.24	22	0.2	21	0.139	0.199	N	0.5	SignalP-TM
NechaP88126	0.11	68	0.109	42	0.118	34	0.103	0.106	N	0.45	SignalP-noTM
NechaP88127	0.2	17	0.22	17	0.384	7	0.241	0.231	N	0.45	SignalP-noTM
NechaP54731	0.194	30	0.151	30	0.151	1	0.123	0.136	N	0.45	SignalP-noTM
NechaP4173	0.116	30	0.115	30	0.165	25	0.111	0.112	N	0.45	SignalP-noTM
NechaP106564	0.111	43	0.113	11	0.159	4	0.121	0.117	N	0.45	SignalP-noTM
NechaP88131	0.108	31	0.105	11	0.115	26	0.104	0.104	N	0.45	SignalP-noTM
NechaP64817	0.115	32	0.124	52	0.232	50	0.12	0.122	N	0.45	SignalP-noTM
NechaP88133	0.194	41	0.138	41	0.138	38	0.098	0.117	N	0.45	SignalP-noTM
NechaP88134	0.199	19	0.293	19	0.576	2	0.402	0.352	N	0.45	SignalP-noTM
NechaP88135	0.843	20	0.881	20	0.962	16	0.925	0.905	Y	0.45	SignalP-noTM
NechaP88136	0.153	34	0.236	34	0.521	33	0.341	0.278	N	0.5	SignalP-TM
NechaP88137	0.705	19	0.644	19	0.832	18	0.56	0.598	Y	0.45	SignalP-noTM
NechaP54716	0.158	18	0.181	18	0.248	3	0.198	0.19	N	0.45	SignalP-noTM
NechaP54805	0.114	66	0.128	11	0.193	1	0.125	0.126	N	0.45	SignalP-noTM
NechaP102202	0.112	70	0.129	70	0.188	59	0.112	0.122	N	0.5	SignalP-TM
NechaP73104	0.107	55	0.108	55	0.124	34	0.101	0.104	N	0.45	SignalP-noTM
NechaP123252	0.333	22	0.409	22	0.677	1	0.507	0.448	N	0.5	SignalP-TM
NechaP88143	0.12	32	0.107	32	0.113	1	0.099	0.103	N	0.45	SignalP-noTM
NechaP54715	0.144	35	0.169	35	0.234	28	0.149	0.161	N	0.5	SignalP-TM
NechaP54781	0.108	17	0.111	57	0.165	45	0.099	0.106	N	0.5	SignalP-TM
NechaP64827	0.116	44	0.112	44	0.125	38	0.1	0.106	N	0.45	SignalP-noTM
NechaP9659	0.114	33	0.11	33	0.133	3	0.11	0.11	N	0.45	SignalP-noTM
NechaP97980	0.184	32	0.145	32	0.253	2	0.128	0.136	N	0.45	SignalP-noTM
NechaP64833	0.164	23	0.12	23	0.115	30	0.089	0.103	N	0.45	SignalP-noTM
NechaP88150	0.116	67	0.112	51	0.127	38	0.102	0.107	N	0.45	SignalP-noTM
NechaP64834	0.366	22	0.273	22	0.272	2	0.202	0.235	N	0.45	SignalP-noTM
NechaP88152	0.11	65	0.112	11	0.14	1	0.104	0.108	N	0.45	SignalP-noTM
NechaP88153	0.108	61	0.104	65	0.122	4	0.098	0.101	N	0.45	SignalP-noTM
NechaP88154	0.133	20	0.116	20	0.13	19	0.103	0.109	N	0.45	SignalP-noTM
NechaP88155	0.121	32	0.125	11	0.172	1	0.133	0.129	N	0.45	SignalP-noTM
NechaP16903	0.129	66	0.121	11	0.154	3	0.142	0.132	N	0.45	SignalP-noTM
NechaP88157	0.114	21	0.111	21	0.14	11	0.108	0.109	N	0.45	SignalP-noTM
NechaP88158	0.109	34	0.141	13	0.235	1	0.142	0.141	N	0.45	SignalP-noTM
NechaP54871	0.134	50	0.114	11	0.152	6	0.133	0.124	N	0.45	SignalP-noTM
NechaP88161	0.335	24	0.401	24	0.647	1	0.488	0.448	N	0.45	SignalP-noTM
NechaP88162	0.622	17	0.748	17	0.936	12	0.909	0.835	Y	0.45	SignalP-noTM
NechaP88163	0.111	65	0.113	12	0.175	4	0.126	0.12	N	0.45	SignalP-noTM
NechaP88164	0.21	17	0.351	17	0.757	16	0.577	0.473	Y	0.45	SignalP-noTM
NechaP54869	0.144	53	0.132	70	0.195	2	0.12	0.127	N	0.5	SignalP-TM
NechaP11038	0.291	21	0.196	21	0.158	1	0.135	0.172	N	0.5	SignalP-TM
NechaP97987	0.145	37	0.182	27	0.383	25	0.219	0.197	N	0.5	SignalP-TM
NechaP88168	0.162	62	0.126	62	0.126	3	0.101	0.112	N	0.45	SignalP-noTM
NechaP105719	0.109	19	0.105	11	0.113	1	0.098	0.102	N	0.45	SignalP-noTM
NechaP88170	0.111	46	0.107	46	0.122	15	0.101	0.104	N	0.45	SignalP-noTM
NechaP73120	0.112	18	0.105	46	0.111	31	0.096	0.1	N	0.45	SignalP-noTM
NechaP88172	0.125	52	0.159	52	0.318	45	0.151	0.155	N	0.45	SignalP-noTM
NechaP54853	0.138	42	0.121	50	0.197	43	0.086	0.107	N	0.5	SignalP-TM
NechaP54988	0.108	24	0.104	11	0.115	47	0.1	0.102	N	0.45	SignalP-noTM
NechaP97992	0.138	19	0.119	19	0.144	18	0.104	0.111	N	0.45	SignalP-noTM
NechaP54685	0.259	27	0.222	27	0.241	1	0.194	0.207	N	0.45	SignalP-noTM
NechaP54897	0.111	30	0.112	30	0.151	11	0.11	0.111	N	0.45	SignalP-noTM
NechaP54819	0.192	23	0.212	12	0.537	1	0.399	0.287	N	0.5	SignalP-TM
NechaP54795	0.215	31	0.139	11	0.278	6	0.195	0.161	N	0.5	SignalP-TM
NechaP88179	0.116	46	0.153	11	0.263	6	0.226	0.182	N	0.5	SignalP-TM
NechaP88180	0.11	37	0.106	41	0.109	23	0.095	0.1	N	0.45	SignalP-noTM
NechaP88181	0.132	29	0.2	12	0.53	2	0.38	0.297	N	0.45	SignalP-noTM
NechaP97996	0.127	70	0.112	70	0.114	28	0.099	0.105	N	0.45	SignalP-noTM
NechaP54723	0.227	28	0.152	28	0.141	3	0.106	0.127	N	0.45	SignalP-noTM
NechaP88184	0.111	27	0.147	11	0.253	1	0.149	0.148	N	0.45	SignalP-noTM
NechaP88185	0.11	30	0.112	22	0.138	13	0.115	0.114	N	0.45	SignalP-noTM
NechaP88186	0.116	19	0.113	31	0.143	15	0.114	0.114	N	0.45	SignalP-noTM
NechaP88187	0.249	26	0.335	17	0.663	5	0.53	0.44	N	0.45	SignalP-noTM
NechaP88188	0.13	26	0.202	13	0.464	5	0.356	0.285	N	0.45	SignalP-noTM
NechaP88189	0.145	44	0.127	44	0.12	45	0.106	0.116	N	0.45	SignalP-noTM
NechaP97999	0.108	66	0.107	43	0.127	37	0.1	0.104	N	0.5	SignalP-TM
NechaP88191	0.35	20	0.504	20	0.842	1	0.709	0.615	Y	0.45	SignalP-noTM
NechaP54848	0.126	28	0.121	28	0.167	2	0.12	0.121	N	0.45	SignalP-noTM
NechaP98002	0.141	19	0.116	19	0.115	1	0.09	0.102	N	0.45	SignalP-noTM
NechaP102212	0.138	45	0.125	45	0.198	43	0.104	0.114	N	0.45	SignalP-noTM
NechaP106567	0.581	17	0.711	17	0.911	1	0.855	0.789	Y	0.45	SignalP-noTM
NechaP98004	0.109	34	0.133	11	0.199	2	0.136	0.135	N	0.45	SignalP-noTM
NechaP73127	0.11	45	0.133	11	0.278	2	0.159	0.147	N	0.45	SignalP-noTM
NechaP88197	0.108	21	0.102	39	0.108	23	0.094	0.098	N	0.45	SignalP-noTM
NechaP54713	0.127	18	0.112	18	0.174	49	0.099	0.105	N	0.45	SignalP-noTM
NechaP88199	0.113	40	0.108	17	0.137	11	0.113	0.11	N	0.45	SignalP-noTM
NechaP54913	0.106	52	0.109	66	0.161	59	0.104	0.107	N	0.5	SignalP-TM
NechaP54646	0.144	26	0.137	26	0.203	24	0.129	0.132	N	0.45	SignalP-noTM
NechaP73130	0.136	31	0.125	31	0.141	10	0.116	0.12	N	0.45	SignalP-noTM
NechaP54997	0.111	43	0.107	43	0.116	2	0.098	0.102	N	0.45	SignalP-noTM
NechaP88204	0.121	36	0.105	36	0.13	41	0.095	0.1	N	0.45	SignalP-noTM
NechaP88205	0.107	60	0.101	63	0.11	56	0.093	0.097	N	0.45	SignalP-noTM
NechaP54623	0.114	38	0.114	15	0.148	9	0.124	0.119	N	0.45	SignalP-noTM
NechaP73952	0.136	34	0.121	34	0.153	2	0.108	0.114	N	0.45	SignalP-noTM
NechaP73139	0.11	55	0.106	59	0.119	55	0.1	0.103	N	0.45	SignalP-noTM
NechaP73140	0.108	34	0.125	14	0.205	4	0.151	0.139	N	0.45	SignalP-noTM
NechaP88210	0.711	21	0.801	21	0.931	12	0.904	0.857	Y	0.45	SignalP-noTM
NechaP123442	0.758	20	0.851	20	0.975	4	0.956	0.907	Y	0.45	SignalP-noTM
NechaP64862	0.124	29	0.192	17	0.368	5	0.296	0.248	N	0.45	SignalP-noTM
NechaP105729	0.139	24	0.12	24	0.135	1	0.105	0.112	N	0.45	SignalP-noTM
NechaP88214	0.109	12	0.112	12	0.144	24	0.112	0.112	N	0.45	SignalP-noTM
NechaP73954	0.209	28	0.285	28	0.716	21	0.4	0.347	N	0.45	SignalP-noTM
NechaP98018	0.126	20	0.318	19	0.909	3	0.79	0.572	Y	0.45	SignalP-noTM
NechaP102223	0.209	35	0.202	35	0.361	1	0.223	0.213	N	0.45	SignalP-noTM
NechaP12933	0.11	47	0.109	43	0.124	24	0.105	0.107	N	0.45	SignalP-noTM
NechaP88219	0.109	52	0.117	11	0.147	1	0.11	0.113	N	0.45	SignalP-noTM
NechaP102224	0.119	27	0.125	27	0.171	12	0.132	0.128	N	0.45	SignalP-noTM
NechaP54756	0.109	40	0.109	40	0.138	25	0.105	0.107	N	0.45	SignalP-noTM
NechaP64874	0.515	19	0.633	19	0.898	15	0.778	0.711	Y	0.45	SignalP-noTM
NechaP88223	0.15	27	0.141	21	0.269	11	0.153	0.146	N	0.5	SignalP-TM
NechaP88224	0.109	40	0.109	40	0.15	23	0.099	0.104	N	0.45	SignalP-noTM
NechaP54742	0.107	36	0.101	62	0.113	29	0.091	0.096	N	0.45	SignalP-noTM
NechaP73956	0.112	39	0.104	39	0.108	2	0.095	0.099	N	0.45	SignalP-noTM
NechaP4143	0.108	39	0.111	47	0.124	34	0.102	0.106	N	0.45	SignalP-noTM
NechaP64883	0.125	28	0.112	28	0.123	1	0.102	0.106	N	0.45	SignalP-noTM
NechaP54936	0.118	29	0.113	12	0.169	2	0.11	0.111	N	0.45	SignalP-noTM
NechaP54708	0.128	34	0.11	34	0.116	39	0.096	0.102	N	0.45	SignalP-noTM
NechaP102228	0.124	40	0.109	24	0.14	14	0.108	0.109	N	0.5	SignalP-TM
NechaP88231	0.111	55	0.116	12	0.173	4	0.12	0.118	N	0.45	SignalP-noTM
NechaP88232	0.244	55	0.15	55	0.11	54	0.091	0.118	N	0.45	SignalP-noTM
NechaP88233	0.588	24	0.437	24	0.527	6	0.333	0.38	N	0.45	SignalP-noTM
NechaP88234	0.355	28	0.316	28	0.386	25	0.251	0.29	N	0.5	SignalP-TM
NechaP54810	0.119	8	0.104	12	0.113	51	0.093	0.098	N	0.45	SignalP-noTM
NechaP88236	0.115	41	0.112	54	0.136	34	0.109	0.11	N	0.45	SignalP-noTM
NechaP73168	0.129	21	0.148	21	0.278	8	0.17	0.16	N	0.45	SignalP-noTM
NechaP88238	0.141	31	0.157	31	0.245	11	0.182	0.17	N	0.45	SignalP-noTM
NechaP54967	0.134	19	0.123	19	0.186	2	0.107	0.114	N	0.45	SignalP-noTM
NechaP54603	0.136	19	0.115	19	0.138	52	0.095	0.104	N	0.45	SignalP-noTM
NechaP98034	0.138	30	0.164	30	0.29	13	0.19	0.178	N	0.45	SignalP-noTM
NechaP88243	0.759	26	0.795	26	0.957	5	0.844	0.822	Y	0.45	SignalP-noTM
NechaP54776	0.182	31	0.153	22	0.209	1	0.162	0.157	N	0.5	SignalP-TM
NechaP73170	0.124	34	0.154	14	0.381	28	0.247	0.204	N	0.45	SignalP-noTM
NechaP102232	0.116	19	0.126	19	0.192	12	0.135	0.131	N	0.45	SignalP-noTM
NechaP54697	0.122	40	0.122	40	0.169	16	0.122	0.122	N	0.45	SignalP-noTM
NechaP54791	0.111	42	0.111	11	0.135	35	0.119	0.115	N	0.45	SignalP-noTM
NechaP88249	0.125	22	0.109	22	0.124	1	0.094	0.101	N	0.45	SignalP-noTM
NechaP105739	0.112	20	0.109	50	0.138	4	0.107	0.108	N	0.45	SignalP-noTM
NechaP105740	0.11	38	0.106	38	0.113	31	0.098	0.102	N	0.45	SignalP-noTM
NechaP73178	0.108	59	0.107	11	0.114	1	0.105	0.106	N	0.45	SignalP-noTM
NechaP106572	0.579	20	0.734	20	0.958	12	0.932	0.841	Y	0.45	SignalP-noTM
NechaP88254	0.155	32	0.129	32	0.195	9	0.124	0.126	N	0.45	SignalP-noTM
NechaP64899	0.11	17	0.14	66	0.281	57	0.115	0.13	N	0.5	SignalP-TM
NechaP88256	0.11	28	0.107	39	0.13	19	0.103	0.105	N	0.45	SignalP-noTM
NechaP98044	0.186	22	0.324	22	0.765	2	0.556	0.449	N	0.45	SignalP-noTM
NechaP88258	0.465	20	0.673	20	0.992	12	0.974	0.836	Y	0.45	SignalP-noTM
NechaP88259	0.12	17	0.125	17	0.157	2	0.122	0.124	N	0.45	SignalP-noTM
NechaP54669	0.111	46	0.108	11	0.123	1	0.106	0.107	N	0.45	SignalP-noTM
NechaP54774	0.123	29	0.122	29	0.163	26	0.118	0.12	N	0.45	SignalP-noTM
NechaP54879	0.121	21	0.161	21	0.408	13	0.216	0.191	N	0.45	SignalP-noTM
NechaP54933	0.147	59	0.119	59	0.142	57	0.1	0.111	N	0.5	SignalP-TM
NechaP17466	0.175	34	0.165	16	0.307	3	0.213	0.191	N	0.45	SignalP-noTM
NechaP54784	0.118	19	0.108	11	0.16	1	0.095	0.103	N	0.5	SignalP-TM
NechaP54753	0.212	25	0.206	11	0.643	1	0.336	0.258	N	0.5	SignalP-TM
NechaP88267	0.109	59	0.11	11	0.118	8	0.111	0.11	N	0.45	SignalP-noTM
NechaP54865	0.108	62	0.117	70	0.178	63	0.098	0.109	N	0.5	SignalP-TM
NechaP54673	0.108	20	0.105	11	0.125	4	0.104	0.104	N	0.45	SignalP-noTM
NechaP88270	0.676	19	0.797	19	0.972	10	0.939	0.874	Y	0.45	SignalP-noTM
NechaP98052	0.107	37	0.126	69	0.186	64	0.109	0.119	N	0.5	SignalP-TM
NechaP88272	0.865	22	0.893	22	0.977	12	0.921	0.908	Y	0.45	SignalP-noTM
NechaP88273	0.11	32	0.109	32	0.126	19	0.102	0.105	N	0.45	SignalP-noTM
NechaP88274	0.149	42	0.123	42	0.202	14	0.118	0.12	N	0.45	SignalP-noTM
NechaP54874	0.145	57	0.13	57	0.162	42	0.113	0.121	N	0.45	SignalP-noTM
NechaP106573	0.353	17	0.502	17	0.78	2	0.691	0.604	Y	0.45	SignalP-noTM
NechaP54681	0.119	27	0.135	11	0.187	1	0.156	0.146	N	0.45	SignalP-noTM
NechaP88278	0.121	18	0.12	18	0.142	7	0.114	0.117	N	0.45	SignalP-noTM
NechaP54712	0.186	22	0.165	22	0.214	4	0.146	0.155	N	0.45	SignalP-noTM
NechaP54903	0.215	42	0.153	42	0.163	59	0.104	0.133	N	0.5	SignalP-TM
NechaP88281	0.369	40	0.3	40	0.446	1	0.222	0.269	N	0.5	SignalP-TM
NechaP88282	0.216	24	0.302	24	0.721	2	0.43	0.371	N	0.45	SignalP-noTM
NechaP88283	0.14	28	0.167	12	0.313	2	0.231	0.201	N	0.45	SignalP-noTM
NechaP8754	0.11	26	0.109	26	0.125	22	0.107	0.108	N	0.45	SignalP-noTM
NechaP88285	0.136	22	0.145	22	0.215	1	0.152	0.149	N	0.45	SignalP-noTM
NechaP88286	0.206	29	0.138	29	0.141	41	0.089	0.118	N	0.5	SignalP-TM
NechaP15726	0.455	25	0.194	30	0.336	6	0.141	0.173	N	0.5	SignalP-TM
NechaP88288	0.577	21	0.665	21	0.88	12	0.777	0.725	Y	0.45	SignalP-noTM
NechaP54703	0.109	35	0.108	58	0.151	40	0.103	0.105	N	0.45	SignalP-noTM
NechaP54718	0.134	40	0.116	40	0.172	10	0.106	0.111	N	0.45	SignalP-noTM
NechaP88291	0.265	24	0.306	24	0.478	13	0.358	0.334	N	0.45	SignalP-noTM
NechaP54709	0.267	23	0.215	23	0.535	1	0.229	0.221	N	0.5	SignalP-TM
NechaP88293	0.123	26	0.122	26	0.143	8	0.119	0.12	N	0.45	SignalP-noTM
NechaP54751	0.137	49	0.125	49	0.146	13	0.119	0.122	N	0.45	SignalP-noTM
NechaP1812	0.109	28	0.11	12	0.125	1	0.105	0.107	N	0.45	SignalP-noTM
NechaP54651	0.126	48	0.112	48	0.132	43	0.103	0.107	N	0.45	SignalP-noTM
NechaP54614	0.109	29	0.112	20	0.175	13	0.118	0.115	N	0.45	SignalP-noTM
NechaP98065	0.155	32	0.18	13	0.469	2	0.328	0.26	N	0.45	SignalP-noTM
NechaP54750	0.109	55	0.106	55	0.124	9	0.101	0.103	N	0.45	SignalP-noTM
NechaP54864	0.127	51	0.118	51	0.168	47	0.105	0.111	N	0.45	SignalP-noTM
NechaP98068	0.109	38	0.105	28	0.131	12	0.105	0.105	N	0.45	SignalP-noTM
NechaP88302	0.615	22	0.744	22	0.963	4	0.899	0.828	Y	0.45	SignalP-noTM
NechaP73183	0.291	21	0.447	21	0.821	4	0.682	0.574	Y	0.45	SignalP-noTM
NechaP88304	0.766	19	0.829	19	0.934	12	0.902	0.869	Y	0.45	SignalP-noTM
NechaP98069	0.137	17	0.14	17	0.169	14	0.141	0.14	N	0.45	SignalP-noTM
NechaP54743	0.149	32	0.16	12	0.297	16	0.224	0.195	N	0.45	SignalP-noTM
NechaP88307	0.115	38	0.109	38	0.123	11	0.1	0.104	N	0.45	SignalP-noTM
NechaP7231	0.195	20	0.209	20	0.417	10	0.229	0.219	N	0.45	SignalP-noTM
NechaP73184	0.112	60	0.106	70	0.115	57	0.099	0.102	N	0.45	SignalP-noTM
NechaP54608	0.111	55	0.104	55	0.112	51	0.095	0.099	N	0.45	SignalP-noTM
NechaP98072	0.111	35	0.106	40	0.117	37	0.101	0.104	N	0.45	SignalP-noTM
NechaP88312	0.115	50	0.123	11	0.191	7	0.146	0.135	N	0.45	SignalP-noTM
NechaP98073	0.128	23	0.139	12	0.228	1	0.138	0.138	N	0.45	SignalP-noTM
NechaP88314	0.117	18	0.126	18	0.204	14	0.137	0.132	N	0.45	SignalP-noTM
NechaP88315	0.108	62	0.105	36	0.122	27	0.097	0.1	N	0.45	SignalP-noTM
NechaP88316	0.109	45	0.126	12	0.195	5	0.152	0.141	N	0.45	SignalP-noTM
NechaP98075	0.127	50	0.113	50	0.155	48	0.101	0.107	N	0.45	SignalP-noTM
NechaP88318	0.115	66	0.127	29	0.233	18	0.144	0.134	N	0.5	SignalP-TM
NechaP88319	0.137	22	0.149	22	0.26	40	0.162	0.156	N	0.45	SignalP-noTM
NechaP54877	0.122	19	0.113	19	0.128	12	0.104	0.108	N	0.45	SignalP-noTM
NechaP54845	0.12	28	0.163	42	0.283	31	0.174	0.168	N	0.5	SignalP-TM
NechaP88322	0.481	24	0.628	24	0.918	11	0.82	0.732	Y	0.45	SignalP-noTM
NechaP88323	0.426	23	0.609	23	0.949	14	0.871	0.751	Y	0.45	SignalP-noTM
NechaP54635	0.917	25	0.918	25	0.972	4	0.921	0.92	Y	0.45	SignalP-noTM
NechaP88325	0.121	49	0.155	11	0.378	2	0.204	0.175	N	0.5	SignalP-TM
NechaP54660	0.117	39	0.107	39	0.107	57	0.093	0.099	N	0.45	SignalP-noTM
NechaP54734	0.156	26	0.143	26	0.186	27	0.132	0.137	N	0.45	SignalP-noTM
NechaP13089	0.11	59	0.104	49	0.116	27	0.095	0.099	N	0.45	SignalP-noTM
NechaP54748	0.149	31	0.14	31	0.236	39	0.123	0.133	N	0.5	SignalP-TM
NechaP106576	0.576	20	0.679	20	0.859	16	0.794	0.741	Y	0.45	SignalP-noTM
NechaP98082	0.109	52	0.106	40	0.114	29	0.1	0.103	N	0.45	SignalP-noTM
NechaP102239	0.143	22	0.19	14	0.32	3	0.251	0.223	N	0.45	SignalP-noTM
NechaP55031	0.155	53	0.175	53	0.356	36	0.164	0.171	N	0.5	SignalP-TM
NechaP19503	0.125	68	0.175	12	0.355	1	0.239	0.21	N	0.45	SignalP-noTM
NechaP55037	0.114	21	0.129	12	0.187	1	0.125	0.127	N	0.45	SignalP-noTM
NechaP55027	0.13	30	0.12	30	0.128	29	0.111	0.115	N	0.45	SignalP-noTM
NechaP106577	0.297	21	0.508	21	0.922	14	0.872	0.704	Y	0.45	SignalP-noTM
NechaP55017	0.114	44	0.103	44	0.104	20	0.091	0.097	N	0.45	SignalP-noTM
NechaP73192	0.12	28	0.229	11	0.708	2	0.4	0.322	N	0.45	SignalP-noTM
NechaP55036	0.744	22	0.781	22	0.921	2	0.818	0.801	Y	0.45	SignalP-noTM
NechaP88337	0.108	56	0.103	12	0.107	18	0.098	0.1	N	0.45	SignalP-noTM
NechaP98088	0.249	20	0.208	20	0.222	1	0.166	0.185	N	0.45	SignalP-noTM
NechaP55035	0.158	22	0.131	22	0.126	1	0.108	0.118	N	0.45	SignalP-noTM
NechaP55022	0.146	31	0.138	31	0.22	2	0.146	0.143	N	0.45	SignalP-noTM
NechaP64912	0.61	32	0.464	32	0.492	27	0.315	0.405	N	0.5	SignalP-TM
NechaP88341	0.11	38	0.106	57	0.119	51	0.101	0.103	N	0.45	SignalP-noTM
NechaP55015	0.136	24	0.197	24	0.423	5	0.289	0.247	N	0.45	SignalP-noTM
NechaP88342	0.312	60	0.184	60	0.334	3	0.124	0.152	N	0.45	SignalP-noTM
NechaP4238	0.117	39	0.111	20	0.139	36	0.11	0.111	N	0.45	SignalP-noTM
NechaP55040	0.548	17	0.695	17	0.927	3	0.873	0.791	Y	0.45	SignalP-noTM
NechaP88345	0.185	26	0.161	20	0.219	1	0.14	0.15	N	0.45	SignalP-noTM
NechaP5039	0.268	19	0.164	19	0.119	51	0.1	0.129	N	0.45	SignalP-noTM
NechaP52893	0.11	34	0.164	11	0.296	1	0.227	0.198	N	0.45	SignalP-noTM
NechaP52827	0.123	39	0.119	28	0.161	13	0.118	0.119	N	0.45	SignalP-noTM
NechaP52845	0.129	38	0.117	38	0.125	30	0.108	0.112	N	0.45	SignalP-noTM
NechaP87060	0.109	68	0.109	56	0.132	45	0.102	0.105	N	0.45	SignalP-noTM
NechaP97478	0.109	45	0.116	14	0.135	1	0.125	0.121	N	0.45	SignalP-noTM
NechaP97479	0.173	51	0.139	51	0.232	50	0.129	0.134	N	0.45	SignalP-noTM
NechaP52856	0.108	63	0.107	70	0.125	55	0.101	0.104	N	0.45	SignalP-noTM
NechaP9795	0.109	33	0.118	46	0.166	35	0.115	0.117	N	0.45	SignalP-noTM
NechaP102069	0.109	48	0.109	11	0.133	1	0.1	0.104	N	0.45	SignalP-noTM
NechaP52943	0.704	20	0.751	20	0.929	19	0.803	0.779	Y	0.45	SignalP-noTM
NechaP122939	0.11	68	0.106	68	0.12	50	0.099	0.102	N	0.45	SignalP-noTM
NechaP52965	0.11	26	0.107	13	0.13	2	0.1	0.103	N	0.45	SignalP-noTM
NechaP97483	0.123	34	0.127	20	0.209	8	0.145	0.137	N	0.45	SignalP-noTM
NechaP52988	0.109	12	0.118	12	0.177	2	0.123	0.121	N	0.45	SignalP-noTM
NechaP52968	0.185	37	0.179	37	0.28	26	0.184	0.182	N	0.45	SignalP-noTM
NechaP52835	0.109	55	0.115	11	0.143	1	0.102	0.108	N	0.45	SignalP-noTM
NechaP87071	0.185	42	0.173	15	0.33	4	0.259	0.219	N	0.45	SignalP-noTM
NechaP87072	0.14	51	0.145	51	0.314	48	0.126	0.135	N	0.45	SignalP-noTM
NechaP87073	0.15	29	0.218	15	0.512	1	0.31	0.268	N	0.45	SignalP-noTM
NechaP52952	0.263	41	0.21	41	0.351	34	0.183	0.199	N	0.5	SignalP-TM
NechaP18750	0.135	23	0.2	12	0.456	1	0.313	0.261	N	0.45	SignalP-noTM
NechaP87075	0.203	44	0.159	44	0.163	2	0.123	0.139	N	0.45	SignalP-noTM
NechaP52950	0.505	19	0.576	19	0.751	6	0.642	0.612	Y	0.45	SignalP-noTM
NechaP87077	0.173	22	0.154	22	0.204	2	0.135	0.144	N	0.45	SignalP-noTM
NechaP97489	0.118	23	0.136	20	0.192	7	0.162	0.147	N	0.5	SignalP-TM
NechaP52948	0.115	18	0.112	18	0.134	5	0.104	0.108	N	0.45	SignalP-noTM
NechaP52825	0.127	34	0.117	34	0.174	33	0.108	0.112	N	0.45	SignalP-noTM
NechaP52972	0.116	56	0.108	38	0.117	29	0.102	0.104	N	0.45	SignalP-noTM
NechaP52911	0.112	44	0.109	44	0.117	32	0.097	0.102	N	0.45	SignalP-noTM
NechaP87081	0.55	20	0.574	20	0.667	5	0.595	0.585	Y	0.45	SignalP-noTM
NechaP52832	0.521	22	0.328	22	0.31	17	0.208	0.263	N	0.45	SignalP-noTM
NechaP87083	0.11	37	0.105	66	0.122	45	0.098	0.101	N	0.45	SignalP-noTM
NechaP87084	0.143	42	0.134	21	0.165	12	0.131	0.133	N	0.45	SignalP-noTM
NechaP97493	0.134	23	0.14	12	0.224	1	0.149	0.145	N	0.45	SignalP-noTM
NechaP52885	0.113	38	0.107	14	0.136	4	0.107	0.107	N	0.45	SignalP-noTM
NechaP87087	0.109	53	0.107	43	0.121	2	0.1	0.103	N	0.45	SignalP-noTM
NechaP87088	0.437	22	0.55	22	0.808	5	0.691	0.626	Y	0.45	SignalP-noTM
NechaP87089	0.13	18	0.138	18	0.18	17	0.139	0.138	N	0.45	SignalP-noTM
NechaP87090	0.411	20	0.62	20	0.98	11	0.931	0.788	Y	0.45	SignalP-noTM
NechaP72838	0.111	53	0.111	53	0.131	41	0.104	0.107	N	0.45	SignalP-noTM
NechaP97495	0.622	20	0.398	20	0.331	2	0.25	0.318	N	0.45	SignalP-noTM
NechaP52860	0.165	23	0.193	11	0.402	4	0.323	0.245	N	0.5	SignalP-TM
NechaP87094	0.138	59	0.17	11	0.304	1	0.228	0.201	N	0.45	SignalP-noTM
NechaP18294	0.257	31	0.164	31	0.189	3	0.117	0.139	N	0.45	SignalP-noTM
NechaP52915	0.112	28	0.109	11	0.126	22	0.108	0.108	N	0.45	SignalP-noTM
NechaP87097	0.644	23	0.668	23	0.845	3	0.694	0.682	Y	0.45	SignalP-noTM
NechaP52971	0.123	27	0.123	12	0.166	1	0.122	0.123	N	0.45	SignalP-noTM
NechaP52969	0.504	21	0.604	21	0.841	1	0.712	0.662	Y	0.45	SignalP-noTM
NechaP52901	0.199	23	0.151	23	0.143	20	0.114	0.131	N	0.45	SignalP-noTM
NechaP97500	0.142	42	0.125	42	0.175	49	0.11	0.117	N	0.45	SignalP-noTM
NechaP102073	0.107	17	0.107	17	0.127	22	0.105	0.106	N	0.45	SignalP-noTM
NechaP64565	0.131	34	0.159	12	0.339	6	0.235	0.189	N	0.5	SignalP-TM
NechaP97501	0.227	28	0.235	28	0.359	10	0.245	0.239	N	0.5	SignalP-TM
NechaP106500	0.708	19	0.767	19	0.9	15	0.825	0.798	Y	0.45	SignalP-noTM
NechaP87106	0.115	35	0.139	13	0.351	4	0.213	0.179	N	0.45	SignalP-noTM
NechaP52921	0.161	18	0.125	18	0.117	25	0.097	0.11	N	0.45	SignalP-noTM
NechaP52960	0.252	28	0.21	28	0.315	1	0.189	0.199	N	0.45	SignalP-noTM
NechaP97503	0.132	19	0.119	19	0.133	8	0.103	0.111	N	0.45	SignalP-noTM
NechaP122942	0.108	30	0.103	65	0.108	46	0.097	0.1	N	0.45	SignalP-noTM
NechaP87110	0.109	22	0.112	47	0.155	45	0.101	0.108	N	0.5	SignalP-TM
NechaP87111	0.247	24	0.142	24	0.2	1	0.113	0.13	N	0.5	SignalP-TM
NechaP87112	0.108	65	0.106	11	0.115	4	0.098	0.102	N	0.45	SignalP-noTM
NechaP87113	0.288	47	0.338	47	0.771	42	0.305	0.32	N	0.45	SignalP-noTM
NechaP52892	0.11	61	0.108	37	0.122	20	0.106	0.107	N	0.45	SignalP-noTM
NechaP97506	0.145	27	0.185	27	0.281	15	0.215	0.197	N	0.5	SignalP-TM
NechaP106502	0.115	26	0.119	12	0.164	1	0.114	0.116	N	0.45	SignalP-noTM
NechaP52907	0.136	33	0.115	33	0.115	5	0.098	0.106	N	0.45	SignalP-noTM
NechaP97507	0.12	24	0.114	24	0.153	3	0.108	0.111	N	0.45	SignalP-noTM
NechaP97508	0.119	43	0.161	12	0.295	1	0.204	0.184	N	0.45	SignalP-noTM
NechaP97509	0.116	46	0.108	63	0.127	46	0.101	0.104	N	0.45	SignalP-noTM
NechaP52876	0.11	11	0.111	11	0.12	51	0.107	0.109	N	0.45	SignalP-noTM
NechaP52990	0.528	18	0.69	18	0.942	2	0.892	0.799	Y	0.45	SignalP-noTM
NechaP87123	0.131	33	0.116	33	0.128	31	0.101	0.108	N	0.45	SignalP-noTM
NechaP87124	0.123	19	0.191	11	0.411	1	0.255	0.225	N	0.45	SignalP-noTM
NechaP87125	0.177	21	0.201	21	0.278	13	0.232	0.218	N	0.45	SignalP-noTM
NechaP87126	0.587	20	0.641	20	0.775	15	0.695	0.67	Y	0.45	SignalP-noTM
NechaP87127	0.113	36	0.106	24	0.14	7	0.101	0.103	N	0.45	SignalP-noTM
NechaP13130	0.117	16	0.115	16	0.154	9	0.107	0.111	N	0.45	SignalP-noTM
NechaP87129	0.107	60	0.115	69	0.201	64	0.092	0.106	N	0.5	SignalP-TM
NechaP87130	0.109	37	0.108	46	0.119	39	0.099	0.103	N	0.45	SignalP-noTM
NechaP97514	0.164	39	0.158	31	0.204	21	0.143	0.152	N	0.5	SignalP-TM
NechaP87132	0.108	63	0.103	63	0.114	47	0.095	0.099	N	0.45	SignalP-noTM
NechaP87133	0.345	28	0.543	28	0.96	13	0.841	0.704	Y	0.45	SignalP-noTM
NechaP52870	0.156	19	0.185	11	0.472	3	0.333	0.244	N	0.5	SignalP-TM
NechaP87135	0.112	65	0.109	12	0.122	10	0.11	0.11	N	0.45	SignalP-noTM
NechaP87136	0.191	30	0.143	30	0.14	12	0.111	0.126	N	0.45	SignalP-noTM
NechaP87137	0.114	27	0.106	12	0.12	3	0.104	0.105	N	0.45	SignalP-noTM
NechaP87138	0.111	26	0.12	11	0.152	1	0.111	0.115	N	0.45	SignalP-noTM
NechaP87139	0.231	61	0.15	61	0.137	14	0.103	0.125	N	0.45	SignalP-noTM
NechaP87140	0.119	26	0.128	26	0.175	10	0.139	0.134	N	0.45	SignalP-noTM
NechaP87141	0.112	20	0.107	43	0.121	16	0.105	0.106	N	0.45	SignalP-noTM
NechaP87142	0.122	25	0.167	11	0.323	1	0.207	0.188	N	0.45	SignalP-noTM
NechaP87143	0.11	22	0.112	35	0.122	22	0.111	0.112	N	0.45	SignalP-noTM
NechaP87144	0.141	18	0.278	18	0.64	5	0.536	0.417	N	0.45	SignalP-noTM
NechaP87145	0.127	24	0.131	11	0.186	1	0.133	0.132	N	0.45	SignalP-noTM
NechaP97517	0.204	22	0.141	22	0.113	17	0.098	0.118	N	0.45	SignalP-noTM
NechaP87147	0.292	20	0.413	20	0.712	12	0.594	0.511	Y	0.45	SignalP-noTM
NechaP52848	0.251	23	0.239	23	0.417	2	0.226	0.232	N	0.45	SignalP-noTM
NechaP87151	0.429	23	0.262	23	0.215	19	0.16	0.207	N	0.45	SignalP-noTM
NechaP87152	0.183	31	0.141	31	0.229	12	0.139	0.14	N	0.5	SignalP-TM
NechaP87153	0.109	28	0.105	11	0.116	3	0.103	0.104	N	0.45	SignalP-noTM
NechaP87154	0.135	41	0.131	23	0.226	17	0.159	0.142	N	0.5	SignalP-TM
NechaP97519	0.149	22	0.187	22	0.294	8	0.232	0.211	N	0.45	SignalP-noTM
NechaP87156	0.109	34	0.106	46	0.121	36	0.097	0.101	N	0.45	SignalP-noTM
NechaP87157	0.165	37	0.143	37	0.18	12	0.135	0.139	N	0.45	SignalP-noTM
NechaP87158	0.548	24	0.689	24	0.962	11	0.868	0.786	Y	0.45	SignalP-noTM
NechaP64568	0.16	18	0.122	18	0.14	23	0.094	0.107	N	0.45	SignalP-noTM
NechaP87160	0.814	21	0.852	21	0.955	11	0.892	0.874	Y	0.45	SignalP-noTM
NechaP87161	0.117	29	0.142	11	0.31	2	0.177	0.161	N	0.45	SignalP-noTM
NechaP6337	0.18	30	0.161	30	0.219	35	0.124	0.146	N	0.5	SignalP-TM
NechaP87163	0.108	42	0.107	57	0.154	39	0.096	0.101	N	0.45	SignalP-noTM
NechaP52941	0.119	24	0.118	24	0.16	22	0.115	0.116	N	0.45	SignalP-noTM
NechaP87165	0.74	20	0.744	20	0.879	4	0.735	0.739	Y	0.45	SignalP-noTM
NechaP87166	0.112	64	0.12	11	0.153	1	0.119	0.12	N	0.45	SignalP-noTM
NechaP87167	0.142	35	0.175	11	0.397	1	0.255	0.207	N	0.5	SignalP-TM
NechaP87168	0.128	38	0.122	20	0.188	13	0.117	0.12	N	0.5	SignalP-TM
NechaP53137	0.278	26	0.242	26	0.532	6	0.336	0.28	N	0.5	SignalP-TM
NechaP87170	0.109	42	0.107	31	0.141	12	0.105	0.106	N	0.45	SignalP-noTM
NechaP102077	0.501	22	0.678	22	0.967	5	0.916	0.807	Y	0.45	SignalP-noTM
NechaP53042	0.142	40	0.159	12	0.328	39	0.193	0.177	N	0.45	SignalP-noTM
NechaP106504	0.111	54	0.114	11	0.144	16	0.117	0.116	N	0.45	SignalP-noTM
NechaP53105	0.837	23	0.837	23	0.94	12	0.838	0.838	Y	0.45	SignalP-noTM
NechaP53203	0.465	26	0.59	26	0.948	13	0.76	0.682	Y	0.45	SignalP-noTM
NechaP87176	0.701	22	0.771	22	0.929	4	0.854	0.816	Y	0.45	SignalP-noTM
NechaP87177	0.11	22	0.111	12	0.126	1	0.107	0.109	N	0.45	SignalP-noTM
NechaP87178	0.118	29	0.115	11	0.148	1	0.114	0.115	N	0.45	SignalP-noTM
NechaP16945	0.168	26	0.127	26	0.118	56	0.096	0.11	N	0.45	SignalP-noTM
NechaP53067	0.205	40	0.15	40	0.241	21	0.147	0.149	N	0.5	SignalP-TM
NechaP87181	0.213	18	0.258	18	0.424	16	0.312	0.28	N	0.5	SignalP-TM
NechaP87182	0.161	60	0.147	60	0.179	57	0.109	0.132	N	0.5	SignalP-TM
NechaP72849	0.132	39	0.174	39	0.481	34	0.18	0.177	N	0.45	SignalP-noTM
NechaP53126	0.109	27	0.126	25	0.205	14	0.139	0.131	N	0.5	SignalP-TM
NechaP87185	0.457	20	0.65	20	0.967	11	0.922	0.797	Y	0.45	SignalP-noTM
NechaP53008	0.148	17	0.132	17	0.181	15	0.121	0.126	N	0.45	SignalP-noTM
NechaP87187	0.165	26	0.205	11	0.528	1	0.277	0.244	N	0.45	SignalP-noTM
NechaP87188	0.114	44	0.12	12	0.192	4	0.136	0.129	N	0.45	SignalP-noTM
NechaP87189	0.123	46	0.111	46	0.121	45	0.098	0.104	N	0.45	SignalP-noTM
NechaP87190	0.138	46	0.133	46	0.193	12	0.125	0.13	N	0.5	SignalP-TM
NechaP5078	0.216	53	0.157	53	0.204	11	0.137	0.149	N	0.5	SignalP-TM
NechaP87192	0.477	24	0.644	24	0.944	12	0.868	0.765	Y	0.45	SignalP-noTM
NechaP87193	0.115	22	0.114	22	0.132	14	0.112	0.113	N	0.45	SignalP-noTM
NechaP87194	0.109	61	0.123	12	0.158	11	0.132	0.128	N	0.45	SignalP-noTM
NechaP87195	0.113	38	0.133	38	0.37	33	0.149	0.142	N	0.45	SignalP-noTM
NechaP102079	0.111	18	0.111	69	0.165	49	0.103	0.107	N	0.45	SignalP-noTM
NechaP53170	0.107	27	0.155	11	0.294	1	0.167	0.161	N	0.45	SignalP-noTM
NechaP72854	0.239	19	0.461	19	0.932	2	0.881	0.688	Y	0.45	SignalP-noTM
NechaP87199	0.112	37	0.113	21	0.184	15	0.121	0.118	N	0.45	SignalP-noTM
NechaP19448	0.15	13	0.154	13	0.292	12	0.166	0.16	N	0.45	SignalP-noTM
NechaP87201	0.316	27	0.371	27	0.561	3	0.454	0.404	N	0.5	SignalP-TM
NechaP53068	0.107	59	0.106	67	0.115	52	0.099	0.103	N	0.45	SignalP-noTM
NechaP87203	0.112	37	0.112	23	0.136	22	0.116	0.114	N	0.45	SignalP-noTM
NechaP87204	0.127	35	0.116	35	0.187	34	0.103	0.109	N	0.45	SignalP-noTM
NechaP87205	0.109	53	0.125	14	0.164	1	0.133	0.129	N	0.45	SignalP-noTM
NechaP87206	0.162	50	0.129	50	0.172	49	0.103	0.115	N	0.45	SignalP-noTM
NechaP87207	0.139	39	0.134	16	0.162	15	0.129	0.132	N	0.45	SignalP-noTM
NechaP97537	0.236	28	0.219	11	0.573	1	0.327	0.277	N	0.45	SignalP-noTM
NechaP53101	0.112	10	0.113	65	0.143	47	0.105	0.109	N	0.45	SignalP-noTM
NechaP53111	0.821	22	0.794	22	0.894	1	0.762	0.777	Y	0.45	SignalP-noTM
NechaP87211	0.185	41	0.149	41	0.17	40	0.127	0.137	N	0.45	SignalP-noTM
NechaP53038	0.11	42	0.109	22	0.132	12	0.113	0.111	N	0.45	SignalP-noTM
NechaP87213	0.131	45	0.116	45	0.132	42	0.099	0.107	N	0.45	SignalP-noTM
NechaP53077	0.123	23	0.114	50	0.144	42	0.106	0.11	N	0.45	SignalP-noTM
NechaP87215	0.271	34	0.202	34	0.27	33	0.134	0.175	N	0.5	SignalP-TM
NechaP72858	0.111	28	0.104	67	0.112	3	0.097	0.1	N	0.45	SignalP-noTM
NechaP53168	0.125	54	0.141	54	0.302	51	0.113	0.129	N	0.5	SignalP-TM
NechaP87218	0.163	40	0.286	40	0.825	37	0.256	0.274	N	0.5	SignalP-TM
NechaP53052	0.171	16	0.228	16	0.48	2	0.283	0.258	N	0.45	SignalP-noTM
NechaP87220	0.127	20	0.138	20	0.242	12	0.149	0.144	N	0.45	SignalP-noTM
NechaP87221	0.126	35	0.121	48	0.191	45	0.111	0.115	N	0.45	SignalP-noTM
NechaP87222	0.12	27	0.126	22	0.163	3	0.139	0.133	N	0.45	SignalP-noTM
NechaP53044	0.178	33	0.139	33	0.142	32	0.109	0.123	N	0.45	SignalP-noTM
NechaP53005	0.209	20	0.175	20	0.18	18	0.148	0.16	N	0.45	SignalP-noTM
NechaP53166	0.135	23	0.122	23	0.132	35	0.111	0.116	N	0.45	SignalP-noTM
NechaP97545	0.241	19	0.407	19	0.805	3	0.666	0.547	Y	0.45	SignalP-noTM
NechaP53195	0.11	43	0.12	27	0.164	18	0.127	0.123	N	0.5	SignalP-TM
NechaP52994	0.246	19	0.469	19	0.941	4	0.893	0.698	Y	0.45	SignalP-noTM
NechaP53061	0.637	19	0.664	19	0.9	18	0.683	0.674	Y	0.45	SignalP-noTM
NechaP53109	0.163	21	0.148	21	0.169	19	0.131	0.138	N	0.45	SignalP-noTM
NechaP64583	0.173	25	0.153	25	0.176	20	0.135	0.143	N	0.45	SignalP-noTM
NechaP87232	0.144	27	0.119	27	0.113	6	0.098	0.108	N	0.45	SignalP-noTM
NechaP53144	0.138	41	0.118	41	0.135	54	0.097	0.106	N	0.45	SignalP-noTM
NechaP53012	0.189	36	0.149	36	0.21	31	0.116	0.131	N	0.45	SignalP-noTM
NechaP102084	0.109	64	0.135	11	0.219	1	0.118	0.126	N	0.45	SignalP-noTM
NechaP53134	0.109	44	0.108	28	0.134	11	0.108	0.108	N	0.45	SignalP-noTM
NechaP87237	0.11	70	0.108	41	0.12	30	0.102	0.105	N	0.45	SignalP-noTM
NechaP97551	0.116	67	0.124	67	0.181	26	0.118	0.122	N	0.5	SignalP-TM
NechaP97552	0.64	17	0.767	17	0.94	1	0.913	0.846	Y	0.45	SignalP-noTM
NechaP53107	0.126	16	0.107	41	0.122	55	0.096	0.101	N	0.45	SignalP-noTM
NechaP52997	0.113	28	0.104	70	0.109	3	0.098	0.101	N	0.45	SignalP-noTM
NechaP53159	0.109	62	0.112	12	0.142	2	0.113	0.113	N	0.45	SignalP-noTM
NechaP72861	0.112	47	0.11	47	0.136	26	0.101	0.105	N	0.45	SignalP-noTM
NechaP97553	0.331	25	0.466	25	0.831	15	0.668	0.575	Y	0.45	SignalP-noTM
NechaP87245	0.116	23	0.117	23	0.16	18	0.119	0.118	N	0.45	SignalP-noTM
NechaP14486	0.134	39	0.136	39	0.43	32	0.141	0.139	N	0.45	SignalP-noTM
NechaP87247	0.492	24	0.606	24	0.915	2	0.754	0.686	Y	0.45	SignalP-noTM
NechaP53037	0.132	66	0.108	33	0.152	67	0.092	0.101	N	0.5	SignalP-TM
NechaP87249	0.151	38	0.125	38	0.126	34	0.099	0.111	N	0.45	SignalP-noTM
NechaP87250	0.111	29	0.107	11	0.129	7	0.107	0.107	N	0.45	SignalP-noTM
NechaP53192	0.109	52	0.109	65	0.138	50	0.102	0.105	N	0.45	SignalP-noTM
NechaP28766	0.632	17	0.748	17	0.928	11	0.891	0.825	Y	0.45	SignalP-noTM
NechaP53204	0.109	66	0.107	66	0.125	43	0.097	0.101	N	0.45	SignalP-noTM
NechaP9629	0.139	43	0.117	43	0.123	22	0.099	0.107	N	0.45	SignalP-noTM
NechaP53003	0.118	32	0.115	11	0.179	40	0.118	0.117	N	0.45	SignalP-noTM
NechaP102087	0.11	68	0.109	14	0.122	10	0.108	0.108	N	0.45	SignalP-noTM
NechaP87258	0.108	23	0.108	13	0.16	2	0.109	0.109	N	0.45	SignalP-noTM
NechaP53179	0.299	17	0.52	17	0.951	11	0.905	0.728	Y	0.45	SignalP-noTM
NechaP26554	0.11	19	0.108	46	0.125	35	0.101	0.104	N	0.45	SignalP-noTM
NechaP64589	0.112	34	0.107	34	0.113	9	0.101	0.103	N	0.45	SignalP-noTM
NechaP87262	0.109	64	0.114	12	0.141	11	0.12	0.117	N	0.45	SignalP-noTM
NechaP53007	0.107	8	0.104	70	0.109	55	0.096	0.1	N	0.45	SignalP-noTM
NechaP87264	0.112	19	0.119	11	0.159	1	0.107	0.113	N	0.45	SignalP-noTM
NechaP53006	0.137	22	0.156	19	0.256	1	0.177	0.167	N	0.45	SignalP-noTM
NechaP87266	0.208	24	0.178	24	0.261	4	0.153	0.164	N	0.45	SignalP-noTM
NechaP53150	0.19	57	0.143	57	0.156	50	0.105	0.122	N	0.45	SignalP-noTM
NechaP87268	0.13	45	0.115	45	0.133	43	0.105	0.109	N	0.45	SignalP-noTM
NechaP105652	0.131	25	0.122	11	0.162	2	0.119	0.12	N	0.45	SignalP-noTM
NechaP53115	0.116	17	0.122	17	0.171	13	0.128	0.125	N	0.45	SignalP-noTM
NechaP87271	0.566	23	0.723	23	0.984	14	0.924	0.832	Y	0.45	SignalP-noTM
NechaP87272	0.394	21	0.365	21	0.666	18	0.33	0.346	N	0.45	SignalP-noTM
NechaP64595	0.164	24	0.172	24	0.275	1	0.184	0.178	N	0.45	SignalP-noTM
NechaP64597	0.624	18	0.727	18	0.902	8	0.849	0.793	Y	0.45	SignalP-noTM
NechaP72877	0.144	64	0.109	21	0.189	68	0.102	0.106	N	0.5	SignalP-TM
NechaP87276	0.257	33	0.212	33	0.306	4	0.168	0.194	N	0.5	SignalP-TM
NechaP97564	0.6	37	0.675	37	0.893	28	0.574	0.621	Y	0.45	SignalP-noTM
NechaP102094	0.141	69	0.12	69	0.118	52	0.1	0.109	N	0.45	SignalP-noTM
NechaP53081	0.138	24	0.117	24	0.156	23	0.099	0.107	N	0.45	SignalP-noTM
NechaP53169	0.109	61	0.123	11	0.167	1	0.133	0.128	N	0.45	SignalP-noTM
NechaP53048	0.113	50	0.108	12	0.121	1	0.105	0.106	N	0.45	SignalP-noTM
NechaP87282	0.122	32	0.112	32	0.136	2	0.105	0.108	N	0.45	SignalP-noTM
NechaP53114	0.113	49	0.109	49	0.134	16	0.103	0.106	N	0.45	SignalP-noTM
NechaP87284	0.265	50	0.177	50	0.184	43	0.106	0.138	N	0.45	SignalP-noTM
NechaP5106	0.225	29	0.15	29	0.144	2	0.106	0.126	N	0.45	SignalP-noTM
NechaP53054	0.121	18	0.116	18	0.171	22	0.112	0.114	N	0.45	SignalP-noTM
NechaP53102	0.111	22	0.104	62	0.11	58	0.096	0.1	N	0.45	SignalP-noTM
NechaP53189	0.465	19	0.598	19	0.867	13	0.752	0.681	Y	0.45	SignalP-noTM
NechaP87289	0.489	23	0.647	23	0.951	13	0.855	0.759	Y	0.45	SignalP-noTM
NechaP87290	0.703	18	0.759	18	0.911	3	0.808	0.786	Y	0.45	SignalP-noTM
NechaP102095	0.611	21	0.568	21	0.669	6	0.527	0.546	Y	0.45	SignalP-noTM
NechaP64607	0.379	23	0.517	23	0.865	19	0.707	0.62	Y	0.45	SignalP-noTM
NechaP87293	0.111	23	0.109	23	0.13	12	0.107	0.108	N	0.45	SignalP-noTM
NechaP87294	0.117	24	0.105	24	0.122	61	0.094	0.099	N	0.45	SignalP-noTM
NechaP87295	0.24	33	0.218	33	0.514	29	0.214	0.216	N	0.45	SignalP-noTM
NechaP87296	0.128	15	0.129	15	0.161	9	0.132	0.131	N	0.45	SignalP-noTM
NechaP53329	0.111	25	0.125	11	0.175	1	0.126	0.126	N	0.45	SignalP-noTM
NechaP53235	0.186	39	0.158	39	0.219	13	0.149	0.153	N	0.45	SignalP-noTM
NechaP87299	0.122	58	0.108	58	0.118	1	0.097	0.102	N	0.45	SignalP-noTM
NechaP53332	0.11	67	0.113	27	0.167	8	0.116	0.115	N	0.45	SignalP-noTM
NechaP105657	0.107	64	0.115	11	0.155	3	0.128	0.12	N	0.5	SignalP-TM
NechaP87302	0.126	43	0.123	43	0.24	38	0.109	0.115	N	0.45	SignalP-noTM
NechaP53260	0.145	22	0.142	22	0.182	4	0.139	0.141	N	0.45	SignalP-noTM
NechaP64609	0.538	21	0.687	21	0.931	4	0.878	0.79	Y	0.45	SignalP-noTM
NechaP97577	0.116	18	0.108	18	0.12	17	0.099	0.103	N	0.45	SignalP-noTM
NechaP53263	0.279	24	0.165	24	0.129	1	0.099	0.129	N	0.45	SignalP-noTM
NechaP105660	0.134	63	0.113	63	0.118	30	0.097	0.104	N	0.45	SignalP-noTM
NechaP72894	0.127	16	0.118	16	0.118	1	0.105	0.111	N	0.45	SignalP-noTM
NechaP72896	0.114	38	0.108	64	0.117	49	0.099	0.103	N	0.45	SignalP-noTM
NechaP53244	0.124	20	0.126	20	0.177	1	0.121	0.123	N	0.45	SignalP-noTM
NechaP53227	0.108	38	0.105	17	0.161	13	0.105	0.105	N	0.45	SignalP-noTM
NechaP97579	0.127	42	0.11	42	0.117	41	0.098	0.103	N	0.45	SignalP-noTM
NechaP53292	0.868	19	0.692	19	0.673	1	0.525	0.602	Y	0.45	SignalP-noTM
NechaP87312	0.108	36	0.11	36	0.121	22	0.106	0.108	N	0.45	SignalP-noTM
NechaP87313	0.136	65	0.145	21	0.268	34	0.178	0.163	N	0.45	SignalP-noTM
NechaP97581	0.568	17	0.649	17	0.85	10	0.77	0.714	Y	0.45	SignalP-noTM
NechaP87315	0.119	23	0.157	45	0.362	44	0.165	0.16	N	0.5	SignalP-TM
NechaP53281	0.108	27	0.115	11	0.148	1	0.105	0.109	N	0.45	SignalP-noTM
NechaP53291	0.162	22	0.127	22	0.128	1	0.099	0.112	N	0.45	SignalP-noTM
NechaP102898	0.748	19	0.837	19	0.971	13	0.941	0.894	Y	0.45	SignalP-noTM
NechaP53223	0.218	49	0.227	49	0.357	45	0.16	0.2	N	0.5	SignalP-TM
NechaP87321	0.224	54	0.122	68	0.173	59	0.108	0.117	N	0.5	SignalP-TM
NechaP97586	0.13	56	0.112	56	0.139	5	0.099	0.105	N	0.45	SignalP-noTM
NechaP53318	0.218	31	0.168	31	0.219	26	0.13	0.147	N	0.45	SignalP-noTM
NechaP105662	0.338	25	0.352	25	0.572	4	0.369	0.361	N	0.45	SignalP-noTM
NechaP97588	0.455	18	0.574	18	0.831	10	0.736	0.662	Y	0.45	SignalP-noTM
NechaP102105	0.108	29	0.103	65	0.111	64	0.091	0.097	N	0.45	SignalP-noTM
NechaP102106	0.111	34	0.105	34	0.116	33	0.097	0.1	N	0.45	SignalP-noTM
NechaP87328	0.353	22	0.51	22	0.853	15	0.738	0.633	Y	0.45	SignalP-noTM
NechaP53311	0.109	57	0.105	57	0.112	22	0.099	0.102	N	0.45	SignalP-noTM
NechaP106516	0.472	19	0.623	19	0.878	15	0.818	0.729	Y	0.45	SignalP-noTM
NechaP53239	0.592	18	0.743	18	0.96	9	0.926	0.842	Y	0.45	SignalP-noTM
NechaP87333	0.236	19	0.174	19	0.181	1	0.117	0.143	N	0.45	SignalP-noTM
NechaP72904	0.11	36	0.113	45	0.148	2	0.11	0.111	N	0.45	SignalP-noTM
NechaP87335	0.119	34	0.111	34	0.12	33	0.103	0.107	N	0.45	SignalP-noTM
NechaP53334	0.142	57	0.126	21	0.135	6	0.115	0.12	N	0.45	SignalP-noTM
NechaP102108	0.11	33	0.107	41	0.114	28	0.1	0.103	N	0.45	SignalP-noTM
NechaP87338	0.132	34	0.143	34	0.29	32	0.129	0.137	N	0.5	SignalP-TM
NechaP53219	0.115	29	0.132	12	0.221	5	0.168	0.152	N	0.45	SignalP-noTM
NechaP53231	0.211	35	0.143	35	0.113	23	0.092	0.116	N	0.45	SignalP-noTM
NechaP87341	0.113	43	0.125	43	0.235	50	0.114	0.121	N	0.5	SignalP-TM
NechaP53217	0.113	20	0.151	20	0.268	12	0.199	0.177	N	0.45	SignalP-noTM
NechaP64633	0.145	22	0.186	22	0.321	5	0.239	0.215	N	0.45	SignalP-noTM
NechaP87344	0.108	62	0.117	51	0.163	48	0.105	0.112	N	0.5	SignalP-TM
NechaP72912	0.118	17	0.112	17	0.126	16	0.106	0.109	N	0.45	SignalP-noTM
NechaP53347	0.11	64	0.131	11	0.203	1	0.121	0.126	N	0.45	SignalP-noTM
NechaP97598	0.109	16	0.123	11	0.171	1	0.121	0.122	N	0.45	SignalP-noTM
NechaP53266	0.189	29	0.16	29	0.166	24	0.136	0.147	N	0.45	SignalP-noTM
NechaP53351	0.129	26	0.125	12	0.176	1	0.151	0.136	N	0.5	SignalP-TM
NechaP53304	0.111	68	0.105	62	0.118	51	0.097	0.101	N	0.45	SignalP-noTM
NechaP53344	0.112	26	0.129	12	0.243	3	0.162	0.147	N	0.45	SignalP-noTM
NechaP53206	0.118	51	0.129	67	0.209	58	0.073	0.107	N	0.5	SignalP-TM
NechaP87353	0.663	19	0.708	19	0.83	1	0.739	0.724	Y	0.45	SignalP-noTM
NechaP53308	0.317	26	0.231	26	0.212	6	0.168	0.197	N	0.45	SignalP-noTM
NechaP97604	0.179	20	0.153	20	0.173	25	0.131	0.141	N	0.45	SignalP-noTM
NechaP53338	0.682	26	0.305	26	0.216	21	0.142	0.217	N	0.45	SignalP-noTM
NechaP53307	0.112	44	0.11	12	0.162	43	0.102	0.105	N	0.45	SignalP-noTM
NechaP27467	0.348	18	0.536	18	0.894	12	0.816	0.687	Y	0.45	SignalP-noTM
NechaP97607	0.107	27	0.103	59	0.11	40	0.093	0.097	N	0.45	SignalP-noTM
NechaP72915	0.122	62	0.119	11	0.158	1	0.116	0.117	N	0.45	SignalP-noTM
NechaP53241	0.109	55	0.108	24	0.117	22	0.108	0.108	N	0.45	SignalP-noTM
NechaP53268	0.11	68	0.108	11	0.126	8	0.115	0.111	N	0.45	SignalP-noTM
NechaP87362	0.491	20	0.621	20	0.843	13	0.786	0.71	Y	0.45	SignalP-noTM
NechaP53240	0.123	31	0.134	11	0.176	6	0.158	0.147	N	0.45	SignalP-noTM
NechaP53207	0.142	31	0.226	31	0.596	29	0.364	0.281	N	0.5	SignalP-TM
NechaP72919	0.243	22	0.179	22	0.247	17	0.131	0.153	N	0.45	SignalP-noTM
NechaP53430	0.109	67	0.105	67	0.122	2	0.099	0.102	N	0.45	SignalP-noTM
NechaP102113	0.328	25	0.451	25	0.811	8	0.623	0.544	Y	0.45	SignalP-noTM
NechaP26462	0.145	55	0.151	11	0.287	1	0.19	0.167	N	0.5	SignalP-TM
NechaP53484	0.223	31	0.249	31	0.45	1	0.301	0.27	N	0.5	SignalP-TM
NechaP87370	0.108	44	0.113	11	0.142	11	0.12	0.116	N	0.45	SignalP-noTM
NechaP87371	0.826	20	0.873	20	0.976	14	0.92	0.898	Y	0.45	SignalP-noTM
NechaP97613	0.127	21	0.143	21	0.247	5	0.161	0.153	N	0.45	SignalP-noTM
NechaP53663	0.26	31	0.164	31	0.186	30	0.1	0.129	N	0.45	SignalP-noTM
NechaP97614	0.114	8	0.111	27	0.13	19	0.112	0.112	N	0.45	SignalP-noTM
NechaP53398	0.15	33	0.198	39	0.389	36	0.212	0.204	N	0.5	SignalP-TM
NechaP87376	0.113	35	0.112	35	0.143	32	0.104	0.108	N	0.45	SignalP-noTM
NechaP53519	0.113	43	0.114	12	0.14	1	0.107	0.11	N	0.45	SignalP-noTM
NechaP87378	0.114	21	0.115	21	0.141	5	0.116	0.116	N	0.45	SignalP-noTM
NechaP87379	0.184	17	0.189	17	0.313	1	0.208	0.197	N	0.5	SignalP-TM
NechaP87380	0.112	24	0.148	12	0.286	2	0.164	0.157	N	0.45	SignalP-noTM
NechaP53596	0.536	19	0.552	19	0.681	10	0.556	0.554	Y	0.45	SignalP-noTM
NechaP53490	0.112	25	0.129	11	0.211	23	0.149	0.14	N	0.45	SignalP-noTM
NechaP53382	0.109	39	0.11	39	0.127	28	0.11	0.11	N	0.45	SignalP-noTM
NechaP97619	0.122	55	0.177	55	0.325	53	0.162	0.171	N	0.5	SignalP-TM
NechaP53654	0.109	19	0.114	45	0.193	41	0.109	0.112	N	0.5	SignalP-TM
NechaP87386	0.184	28	0.177	18	0.241	17	0.169	0.173	N	0.45	SignalP-noTM
NechaP53444	0.12	27	0.165	12	0.32	1	0.243	0.196	N	0.5	SignalP-TM
NechaP87388	0.543	20	0.702	20	0.963	13	0.914	0.816	Y	0.45	SignalP-noTM
NechaP97623	0.133	8	0.116	12	0.142	7	0.128	0.122	N	0.45	SignalP-noTM
NechaP53697	0.259	40	0.162	40	0.151	46	0.099	0.128	N	0.45	SignalP-noTM
NechaP105666	0.108	70	0.104	70	0.11	37	0.097	0.1	N	0.45	SignalP-noTM
NechaP53630	0.129	17	0.105	17	0.109	29	0.087	0.095	N	0.45	SignalP-noTM
NechaP64650	0.115	26	0.138	26	0.209	19	0.159	0.147	N	0.5	SignalP-TM
NechaP97628	0.123	22	0.186	12	0.437	7	0.317	0.257	N	0.45	SignalP-noTM
NechaP87396	0.201	32	0.205	23	0.333	19	0.235	0.217	N	0.5	SignalP-TM
NechaP87397	0.112	47	0.107	47	0.125	35	0.099	0.102	N	0.45	SignalP-noTM
NechaP53410	0.127	61	0.14	61	0.257	39	0.131	0.136	N	0.5	SignalP-TM
NechaP97630	0.11	29	0.104	42	0.111	29	0.095	0.099	N	0.45	SignalP-noTM
NechaP87400	0.115	14	0.127	14	0.172	1	0.118	0.122	N	0.45	SignalP-noTM
NechaP97632	0.165	38	0.121	38	0.139	64	0.088	0.103	N	0.45	SignalP-noTM
NechaP53539	0.112	70	0.109	70	0.132	11	0.101	0.105	N	0.45	SignalP-noTM
NechaP97633	0.143	70	0.135	70	0.18	61	0.097	0.119	N	0.5	SignalP-TM
NechaP87404	0.135	39	0.124	24	0.192	8	0.135	0.13	N	0.45	SignalP-noTM
NechaP53431	0.187	22	0.232	22	0.487	5	0.284	0.26	N	0.45	SignalP-noTM
NechaP87406	0.192	38	0.148	38	0.226	59	0.105	0.131	N	0.5	SignalP-TM
NechaP87407	0.12	24	0.11	19	0.126	28	0.098	0.103	N	0.45	SignalP-noTM
NechaP53385	0.115	18	0.106	45	0.113	3	0.096	0.101	N	0.45	SignalP-noTM
NechaP53442	0.273	23	0.252	23	0.323	20	0.233	0.244	N	0.5	SignalP-TM
NechaP87410	0.357	54	0.301	54	0.427	36	0.188	0.256	N	0.5	SignalP-TM
NechaP72931	0.156	27	0.235	19	0.659	17	0.382	0.314	N	0.45	SignalP-noTM
NechaP29076	0.166	29	0.19	34	0.433	30	0.173	0.183	N	0.5	SignalP-TM
NechaP64655	0.109	40	0.105	63	0.113	49	0.096	0.1	N	0.45	SignalP-noTM
NechaP53518	0.117	37	0.113	37	0.136	36	0.106	0.109	N	0.45	SignalP-noTM
NechaP87415	0.114	63	0.11	63	0.129	48	0.103	0.106	N	0.45	SignalP-noTM
NechaP53378	0.106	48	0.124	48	0.175	38	0.109	0.118	N	0.5	SignalP-TM
NechaP25103	0.152	32	0.212	32	0.529	3	0.313	0.266	N	0.45	SignalP-noTM
NechaP53661	0.11	40	0.104	69	0.109	34	0.097	0.1	N	0.45	SignalP-noTM
NechaP53620	0.197	27	0.276	27	0.588	17	0.439	0.341	N	0.5	SignalP-TM
NechaP87420	0.157	21	0.13	21	0.125	1	0.105	0.116	N	0.45	SignalP-noTM
NechaP87421	0.162	33	0.133	33	0.154	2	0.114	0.123	N	0.45	SignalP-noTM
NechaP87422	0.76	20	0.729	20	0.82	18	0.704	0.716	Y	0.45	SignalP-noTM
NechaP106522	0.755	20	0.84	20	0.963	3	0.937	0.892	Y	0.45	SignalP-noTM
NechaP102121	0.129	38	0.122	29	0.178	3	0.122	0.122	N	0.45	SignalP-noTM
NechaP87425	0.169	27	0.134	27	0.143	5	0.106	0.119	N	0.45	SignalP-noTM
[truncated: 13,707 more rows]
